# Supplementary material
Source: Elsevier journal article supplement (https://authors.library.caltech.edu/47494/7/mmc1.pdf)

**A Unified Strategy for the Synthesis of  
(–)-Maoecrystal Z, (–)-Trichorabdal A, and (–)-Longikaurin E**

John T. S. Yeoman, Jacob Y. Cha, Victor W. Mak, Sarah E. Reisman\*

*The Warren and Katharine Schlinger Laboratory of Chemistry and Chemical Engineering  
Division of Chemistry and Chemical Engineering, California Institute of Technology, Pasadena, California 91125  
reisman@caltech.edu*

**Supporting Information (NMR Spectra):**

jc-1-245-A

Sample Name:

jc-1-245-A

Data Collected on:

indy.caltech.edu-inova500

Archive directory:

/home/jcha/vnmrsys/data

Sample directory:

jc-1-245-A

FidFile: PROTON01

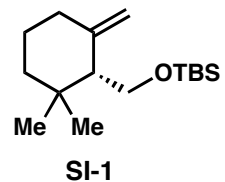

Pulse Sequence: PROTON (s2pul)

Solvent: cdc13

Data collected on: Mar 31 2011

Temp. 25.0 C / 298.1 K

Sample #27, Operator: jcha

Relax. delay 1.000 sec

Pulse 45.0 degrees

Acq. time 2.500 sec

Width 8000.0 Hz

32 repetitions

OBSERVE H1, 499.7290203 MHz

DATA PROCESSING

Line broadening 0.2 Hz

FT size 65536

Total time 1 min 52 sec

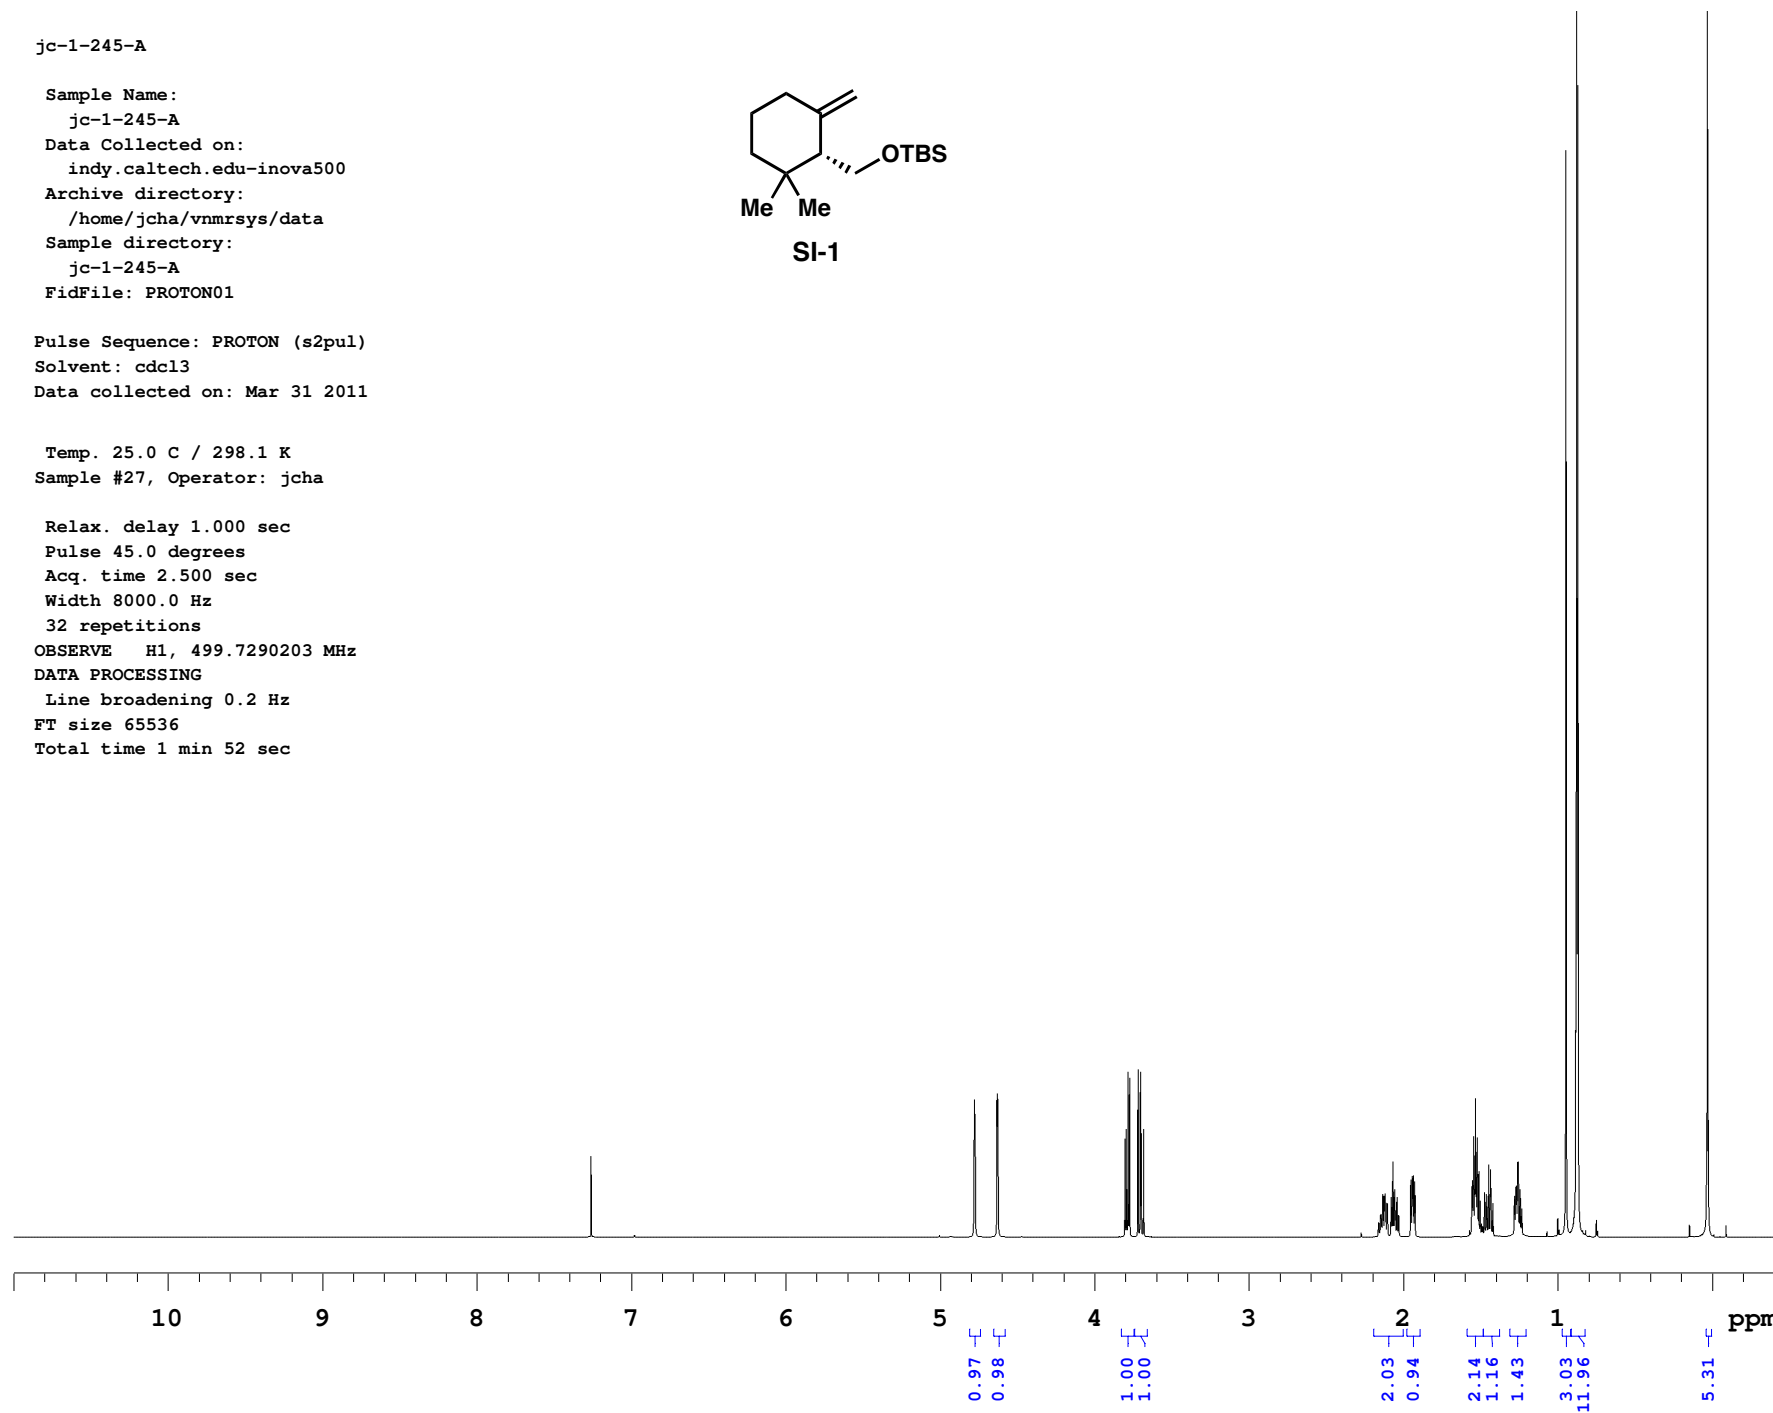

jc-1-245-A

Sample Name:

jc-1-245-A

Data Collected on:

indy.caltech.edu-inova500

Archive directory:

/home/jcha/vnmrsys/data

Sample directory:

jc-1-245-A

FidFile: CARBON01

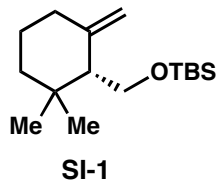

Pulse Sequence: CARBON (s2pul)

Solvent: cdcl3

Data collected on: Mar 31 2011

Temp. 25.0 C / 298.1 K

Sample #27, Operator: jcha

Relax. delay 1.000 sec

Pulse 45.0 degrees

Acq. time 1.042 sec

Width 31446.5 Hz

256 repetitions

OBSERVE C13, 125.6569604 MHz

DECOUPLE H1, 499.7315163 MHz

Power 39 dB

continuously on

WALTZ-16 modulated

DATA PROCESSING

Line broadening 0.5 Hz

FT size 65536

Total time 8 min 45 sec

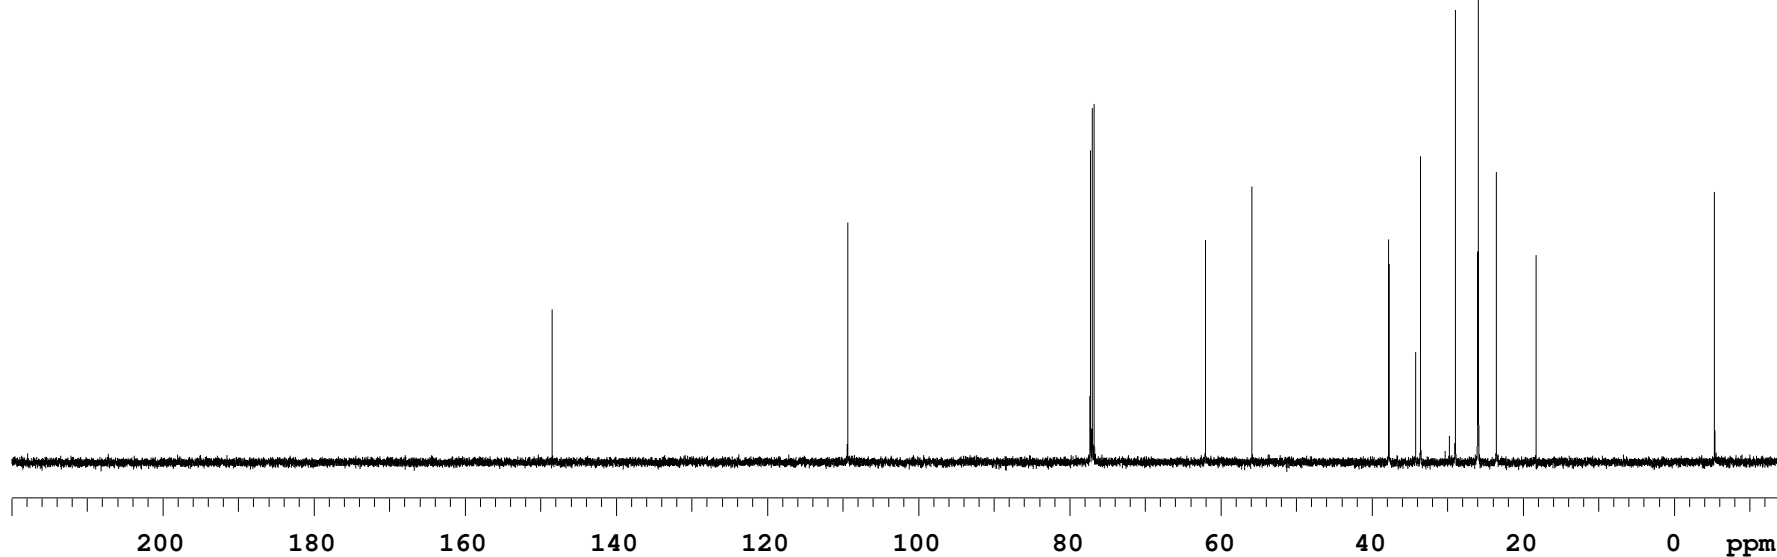

jc-1-246-B

Sample Name:

jc-1-246-B

Data Collected on:

indy.caltech.edu-inova500

Archive directory:

/home/jcha/vnmrsys/data

Sample directory:

jc-1-246-B

FidFile: PROTON01

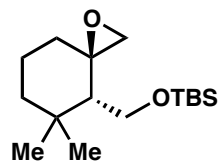

*anti*-23

major diastereomer

Pulse Sequence: PROTON (s2pul)

Solvent: cdc13

Data collected on: Apr 1 2011

Temp. 25.0 C / 298.1 K

Sample #46, Operator: jcha

Relax. delay 1.000 sec

Pulse 45.0 degrees

Acq. time 2.500 sec

Width 8000.0 Hz

64 repetitions

OBSERVE H1, 499.7290203 MHz

DATA PROCESSING

Line broadening 0.2 Hz

FT size 65536

Total time 3 min 45 sec

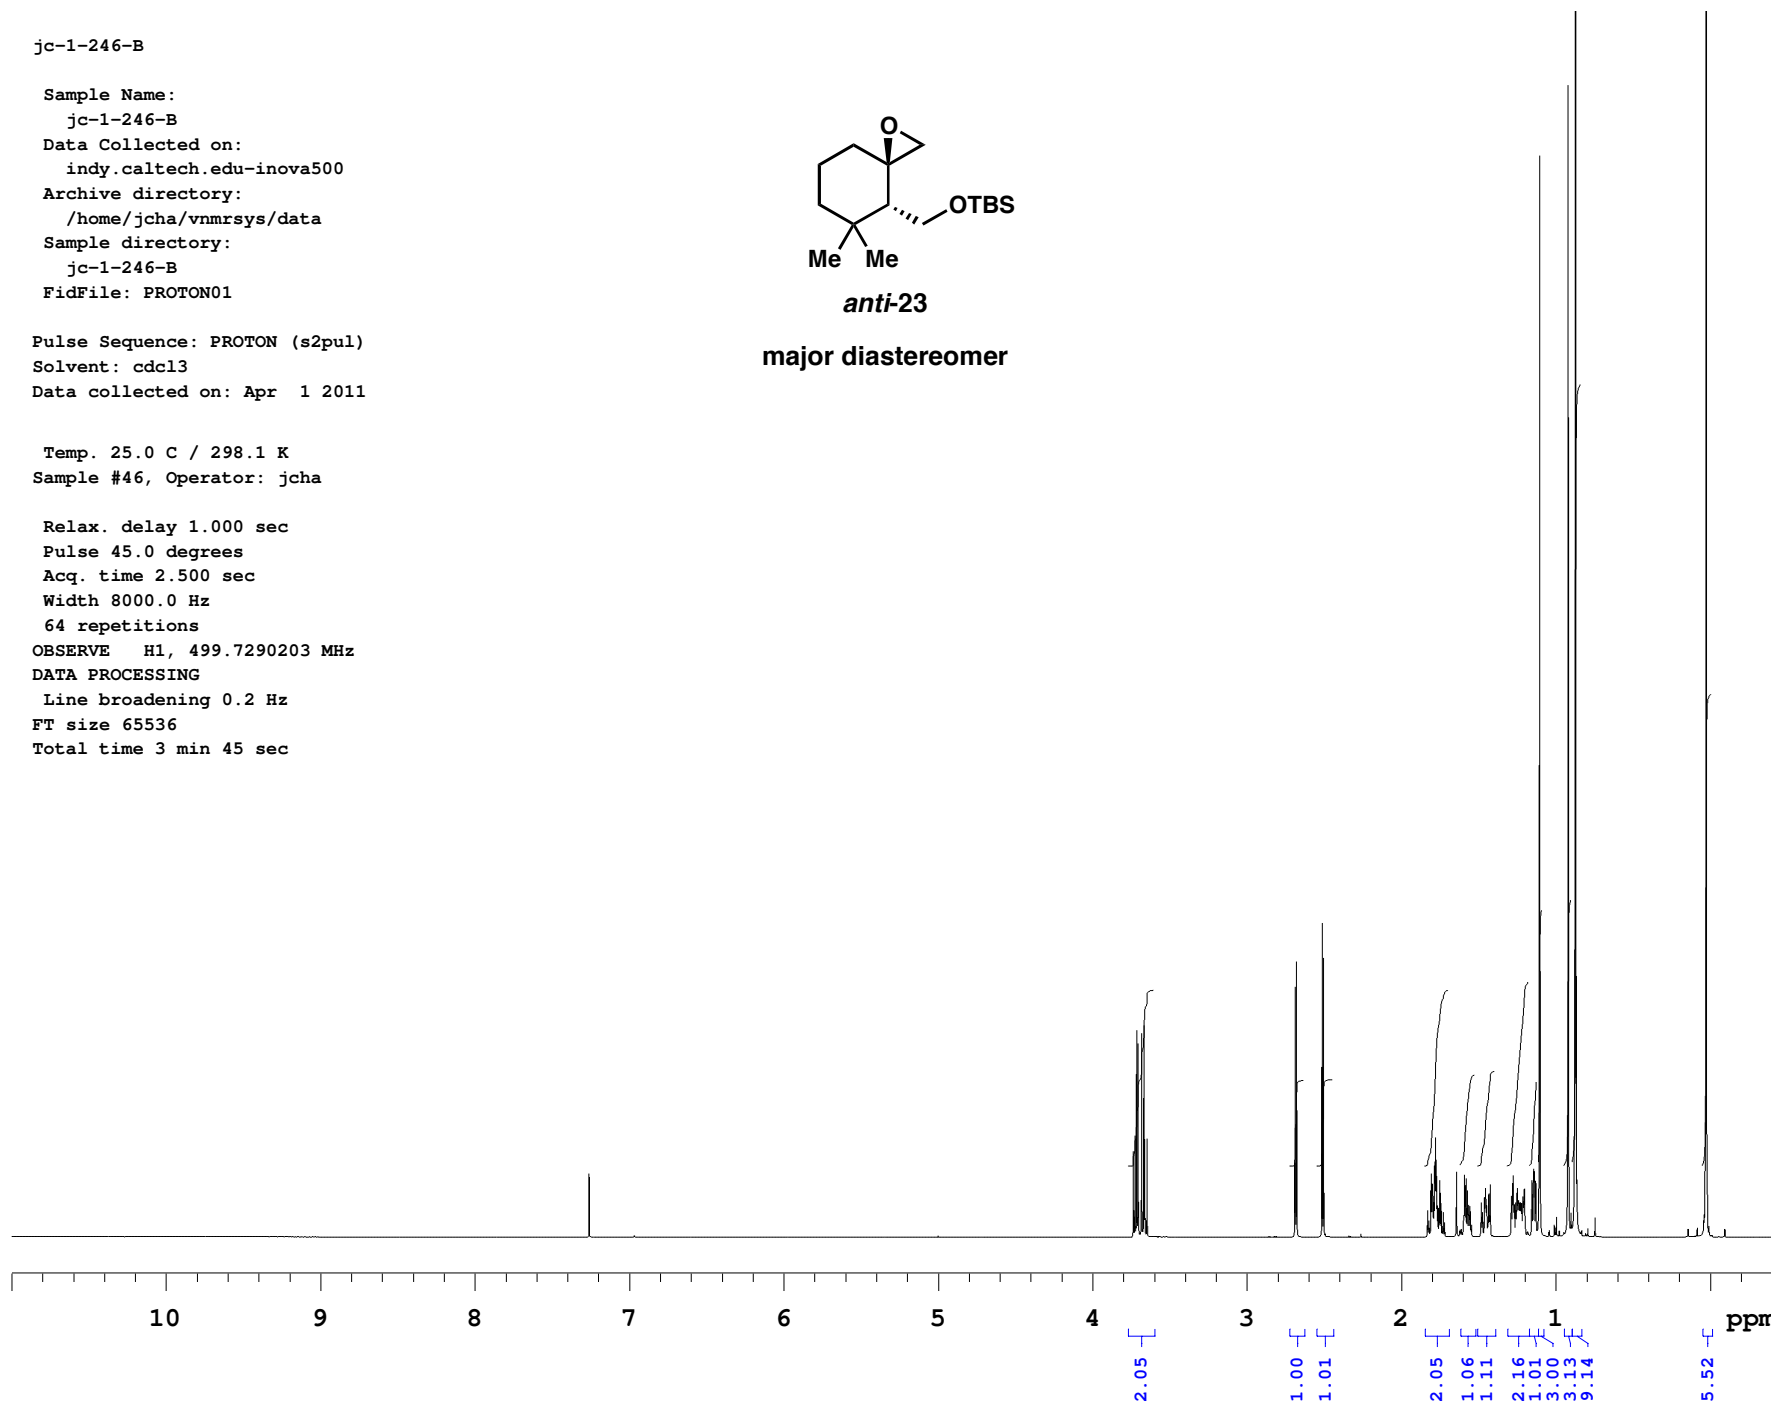



jc-1-246-B

Sample Name:

jc-1-246-B

Data Collected on:

indy.caltech.edu-inova500

Archive directory:

/home/jcha/vnmrsys/data

Sample directory:

jc-1-246-B

FidFile: CARBON01

Pulse Sequence: CARBON (s2pul)

Solvent: cdcl3

Data collected on: Apr 1 2011

Temp. 25.0 C / 298.1 K

Sample #46, Operator: jcha

Relax. delay 1.000 sec

Pulse 45.0 degrees

Acq. time 1.042 sec

Width 31446.5 Hz

512 repetitions

OBSERVE C13, 125.6569623 MHz

DECOUPLE H1, 499.7315163 MHz

Power 39 dB

continuously on

WALTZ-16 modulated

DATA PROCESSING

Line broadening 0.5 Hz

FT size 65536

Total time 17 min

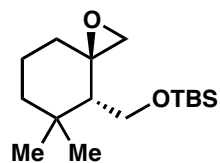

*anti*-23

major diastereomer

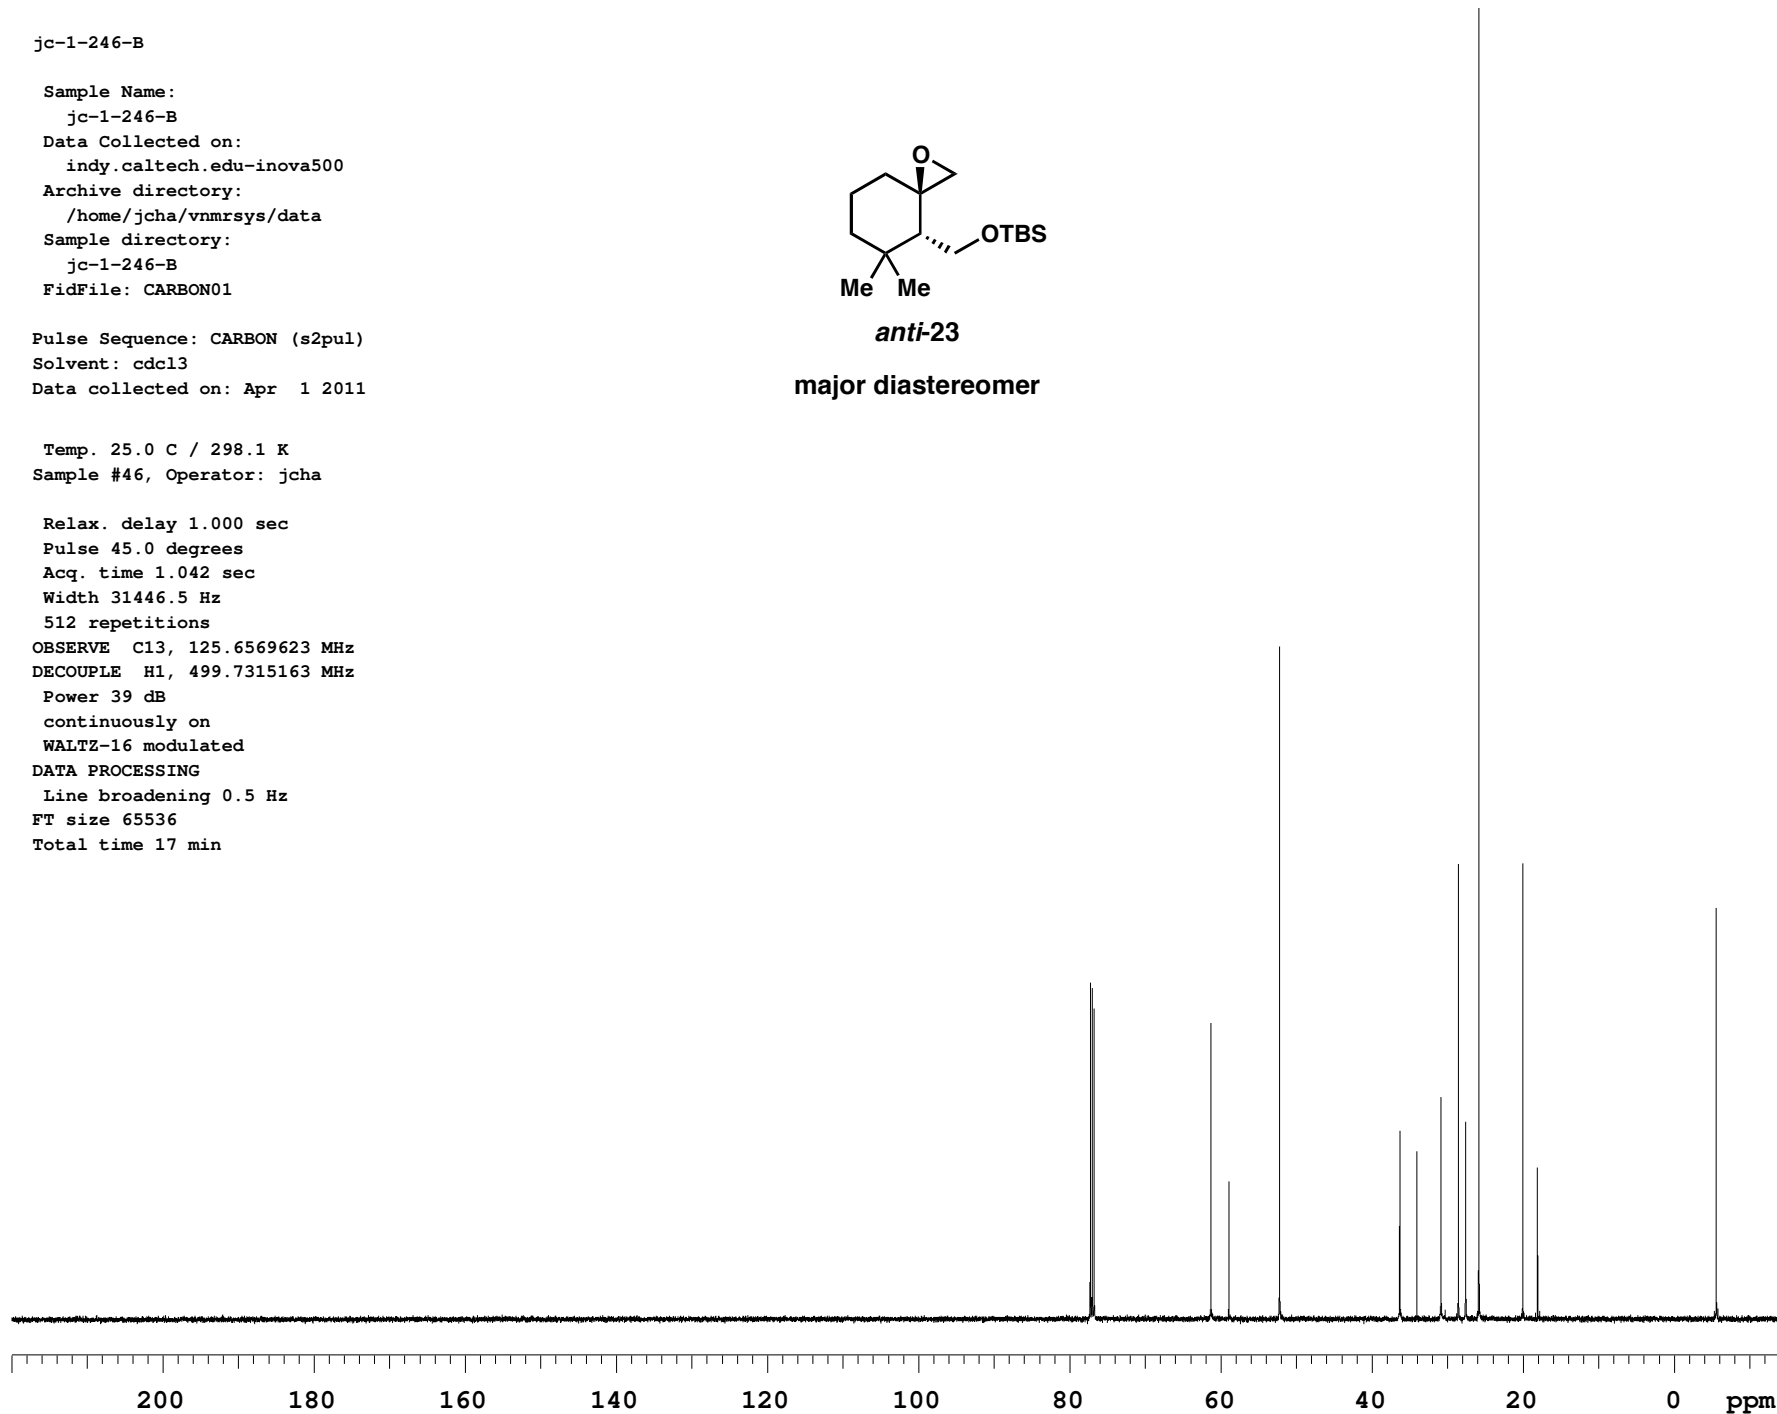

jc-1-246-A

Sample Name:

jc-1-246-A

Data Collected on:

indy.caltech.edu-inova500

Archive directory:

/home/jcha/vnmrsys/data

Sample directory:

jc-1-246-A

FidFile: PROTON02

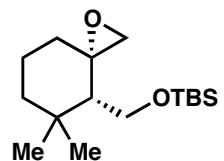

*syn*-23

minor diastereomer

Pulse Sequence: PROTON (s2pul)

Solvent: cdc13

Data collected on: Apr 4 2011

Temp. 25.0 C / 298.1 K

Sample #46, Operator: jcha

Relax. delay 1.000 sec

Pulse 45.0 degrees

Acq. time 2.500 sec

Width 8000.0 Hz

64 repetitions

OBSERVE H1, 499.7290200 MHz

DATA PROCESSING

Line broadening 0.2 Hz

FT size 65536

Total time 3 min 45 sec

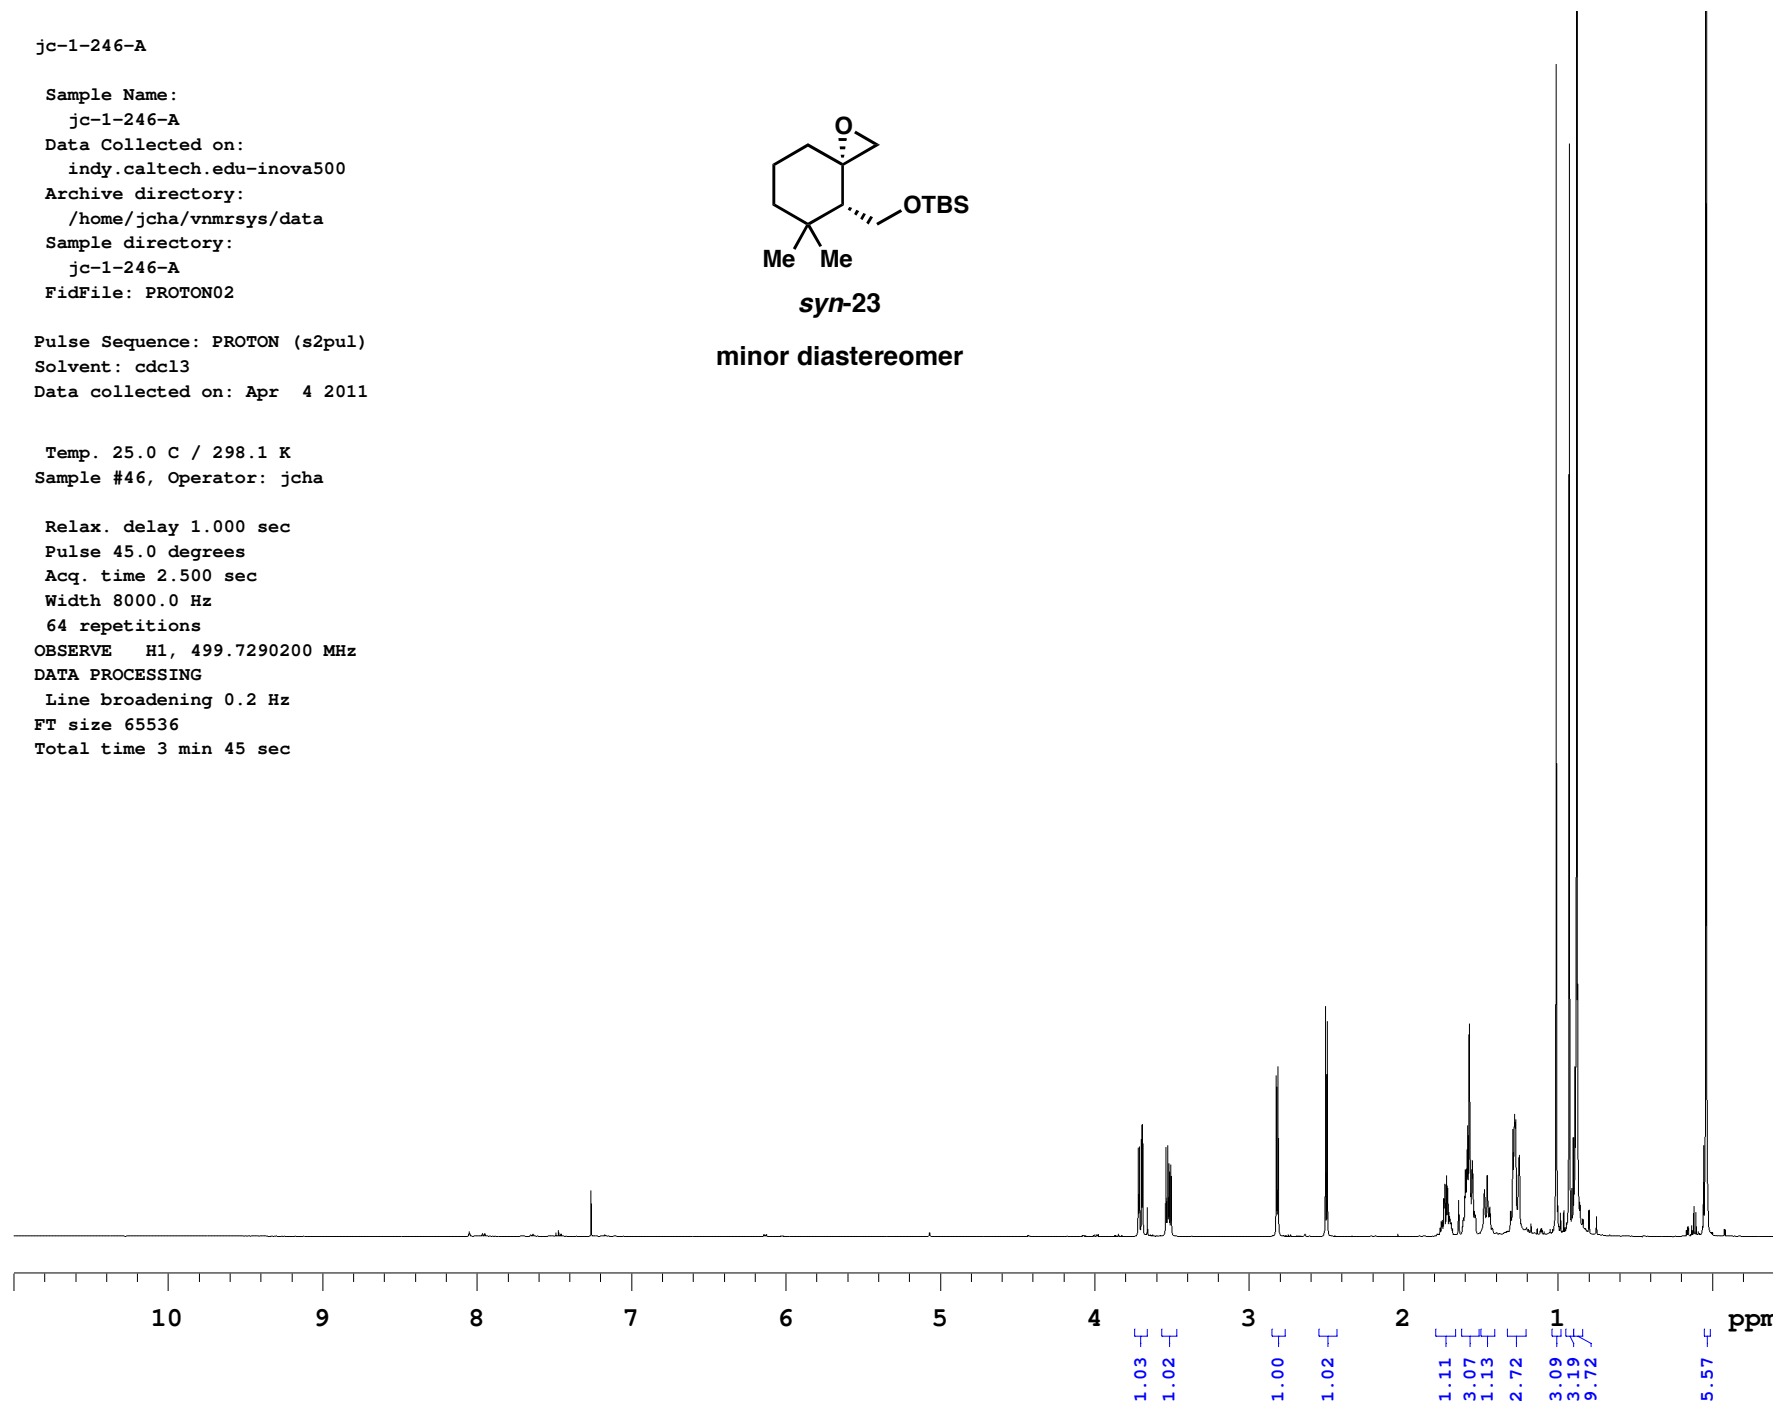

jc-1-246-A

Sample Name:  
jc-1-246-A  
Data Collected on:  
indy.caltech.edu-inova500  
Archive directory:  
/home/jcha/vnmrsys/data  
Sample directory:  
jc-1-246-A  
FidFile: CARBON02

Pulse Sequence: CARBON (s2pul)  
Solvent: cdcl3  
Data collected on: Apr 4 2011

Temp. 25.0 C / 298.1 K  
Sample #46, Operator: jcha

Relax. delay 1.000 sec  
Pulse 45.0 degrees  
Acq. time 1.042 sec  
Width 31446.5 Hz  
512 repetitions  
OBSERVE C13, 125.6569623 MHz  
DECOUPLE H1, 499.7315163 MHz  
Power 39 dB  
continuously on  
WALTZ-16 modulated  
DATA PROCESSING  
Line broadening 0.5 Hz  
FT size 65536  
Total time 17 min

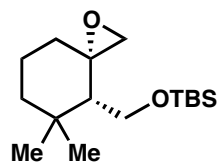

**syn-23**

minor diastereomer

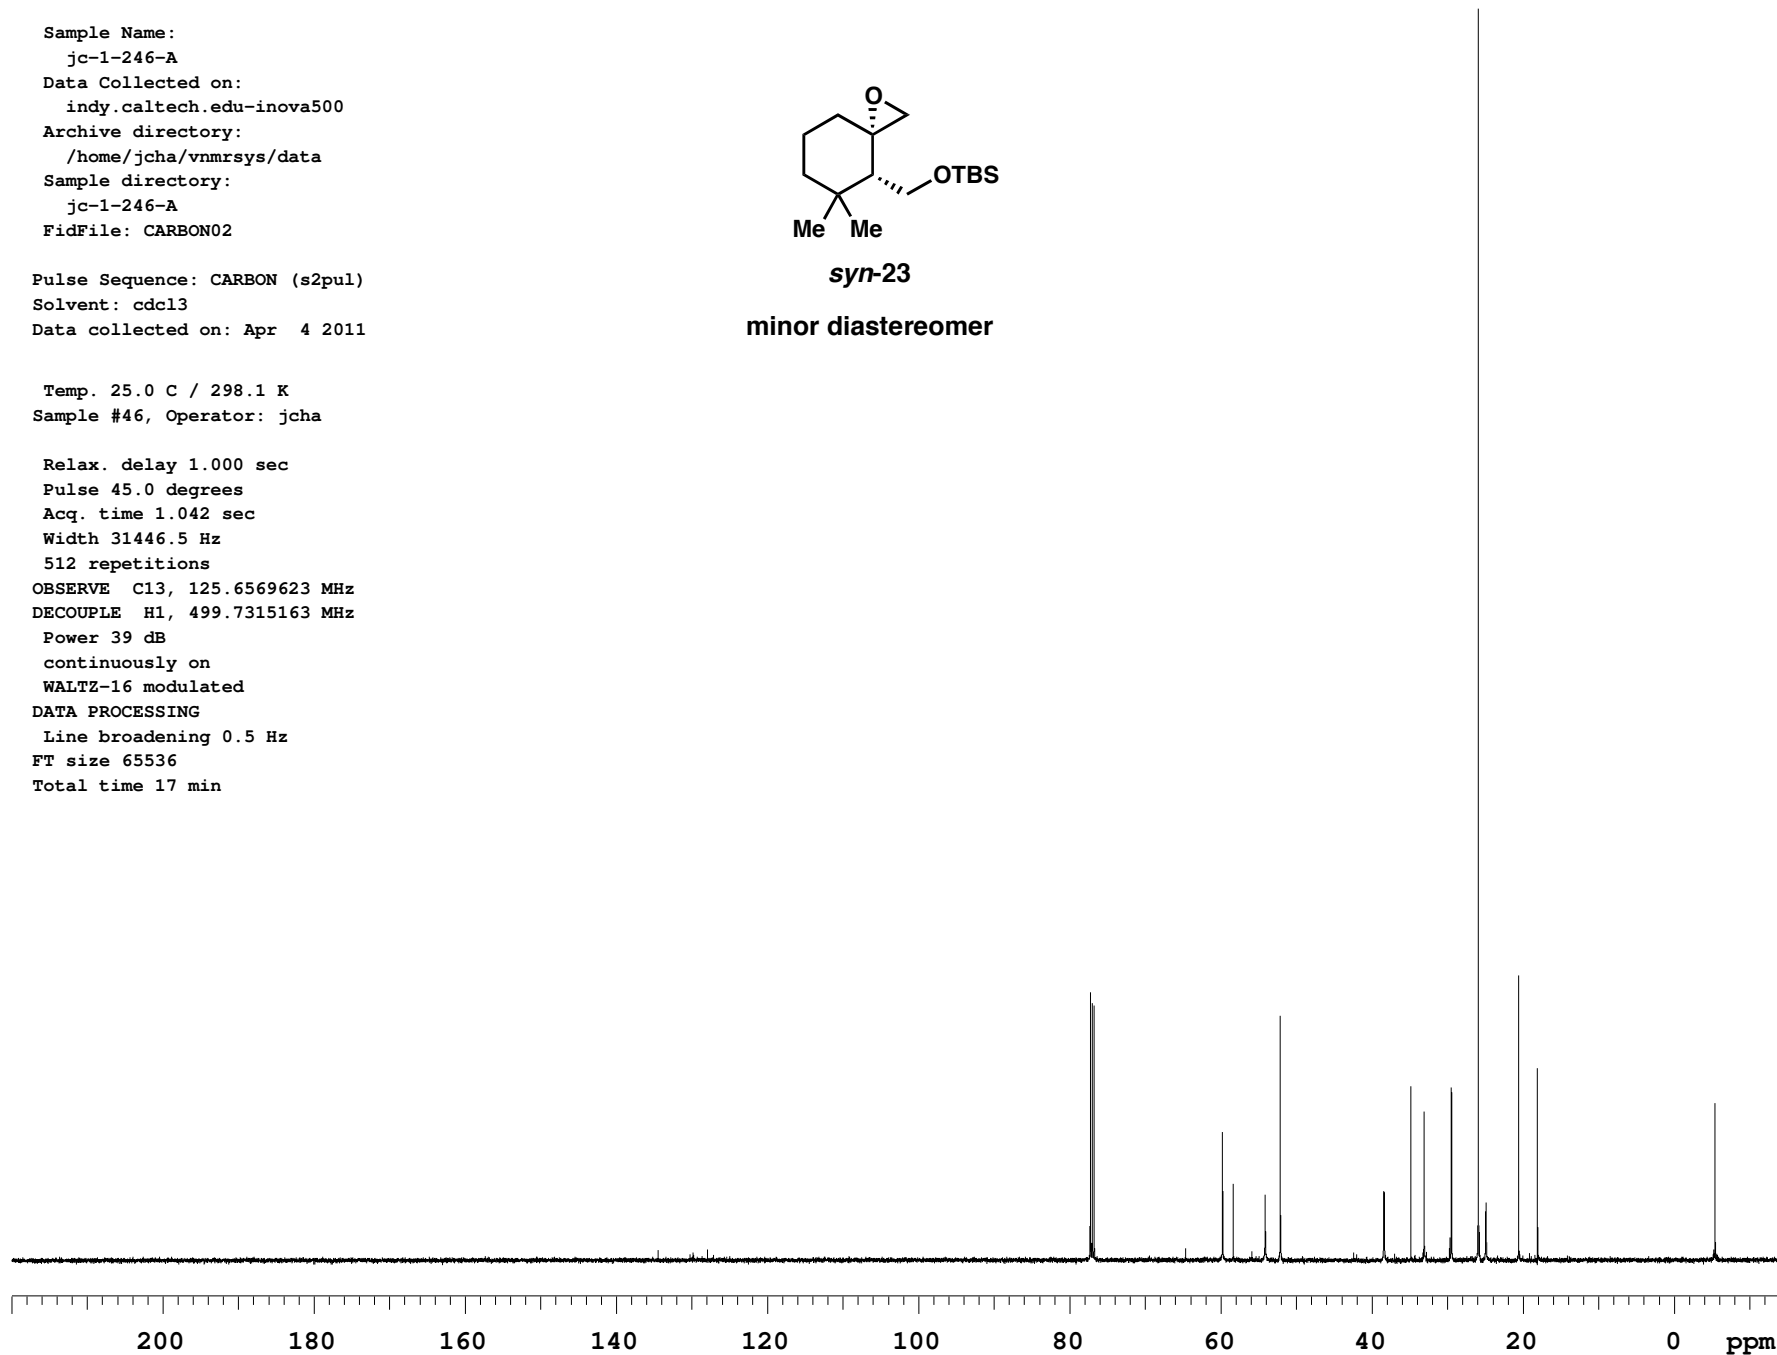

jtsy-v-287

Sample Name:  
jtsy-v-287f15char1  
Data Collected on:  
indy.caltech.edu-inova500  
Archive directory:  
/home/yeomanjo/vnmrsys/data  
Sample directory:  
jtsy-v-287f15char1  
FidFile: PROTON01

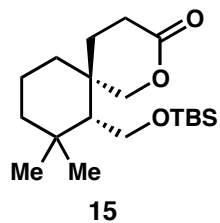

Pulse Sequence: PROTON (s2pul)  
Solvent: cdc13  
Data collected on: Apr 26 2011

Temp. 25.0 C / 298.1 K  
Sample #14, Operator: yeomanjo

Relax. delay 2.000 sec  
Pulse 45.0 degrees  
Acq. time 2.500 sec  
Width 8000.0 Hz  
16 repetitions  
OBSERVE H1, 499.7290203 MHz  
DATA PROCESSING  
Line broadening 0.2 Hz  
FT size 65536  
Total time 1 min 12 sec

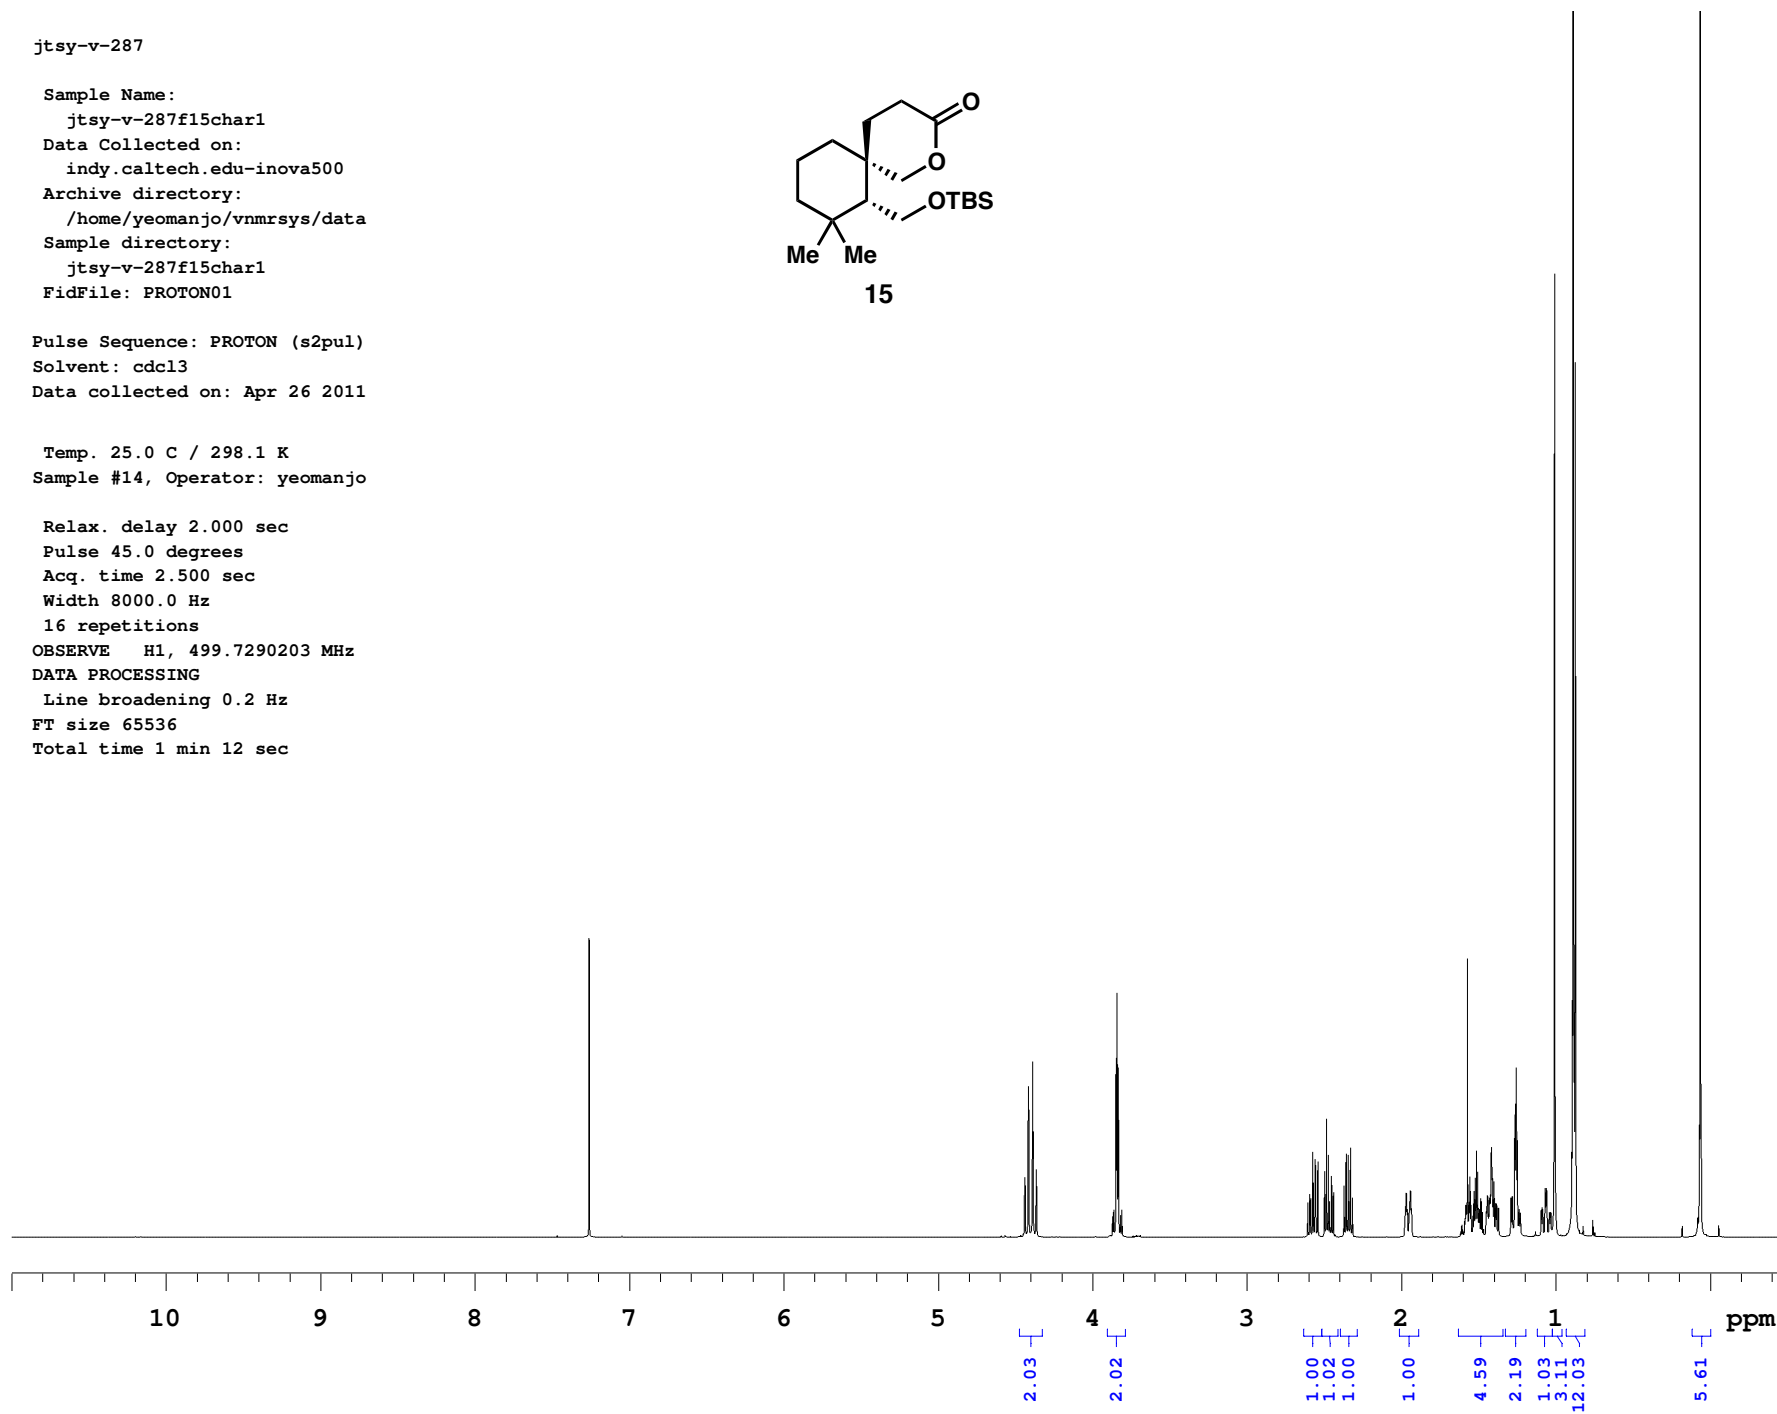

jtsy-v-287f15char1

Sample Name:

jtsy-v-287f15char1

Data Collected on:

indy.caltech.edu-inova500

Archive directory:

/home/yeomanjo/vnmrsys/data

Sample directory:

jtsy-v-287f15char1

FidFile: CARBON01

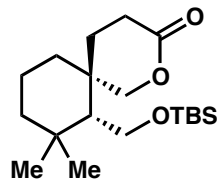

15

Pulse Sequence: CARBON (s2pul)

Solvent: cdcl3

Data collected on: Apr 26 2011

Temp. 25.0 C / 298.1 K

Sample #14, Operator: yeomanjo

Relax. delay 1.000 sec

Pulse 45.0 degrees

Acq. time 1.042 sec

Width 31446.5 Hz

1000 repetitions

OBSERVE C13, 125.6569623 MHz

DECOUPLE H1, 499.7315163 MHz

Power 39 dB

continuously on

WALTZ-16 modulated

DATA PROCESSING

Line broadening 0.5 Hz

FT size 65536

Total time 34 min

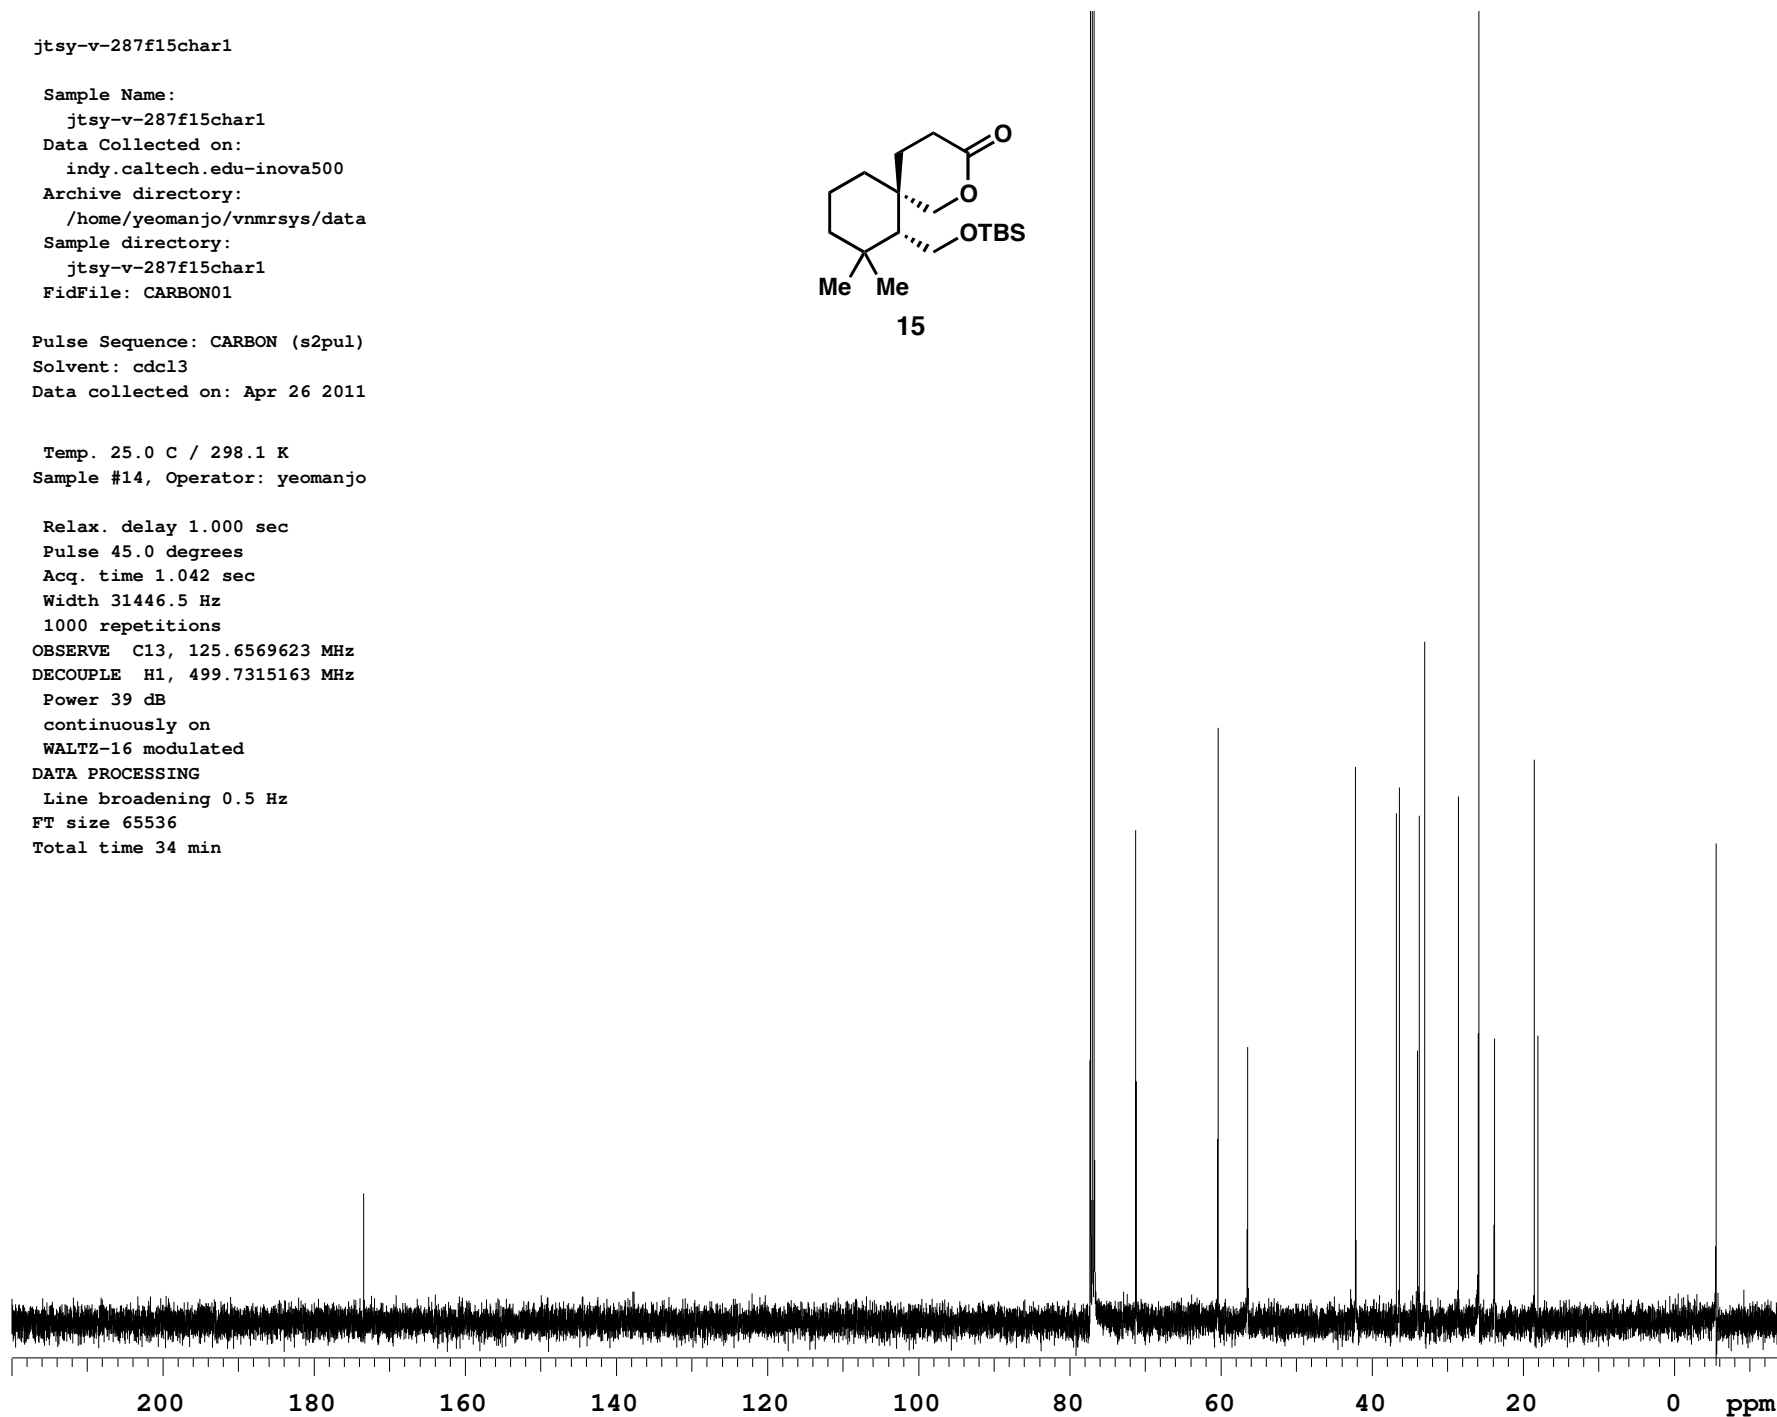

jtsy-vi-183rf12-15

Sample Name:

jtsy-vi-183rf12-15

Data Collected on:

indy.caltech.edu-inova500

Archive directory:

/home/yeomanjo/vnmrsys/data

Sample directory:

jtsy-vi-183rf12-15

FidFile: PROTON02

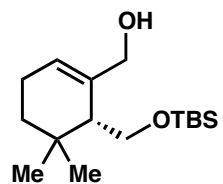

24

Pulse Sequence: PROTON (s2pul)

Solvent: cdc13

Data collected on: Jul 21 2011

Sample #14, Operator: yeomanjo

Relax. delay 2.000 sec

Pulse 45.0 degrees

Acq. time 2.500 sec

Width 8000.0 Hz

16 repetitions

OBSERVE H1, 499.7225128 MHz

DATA PROCESSING

FT size 65536

Total time 1 min 12 sec

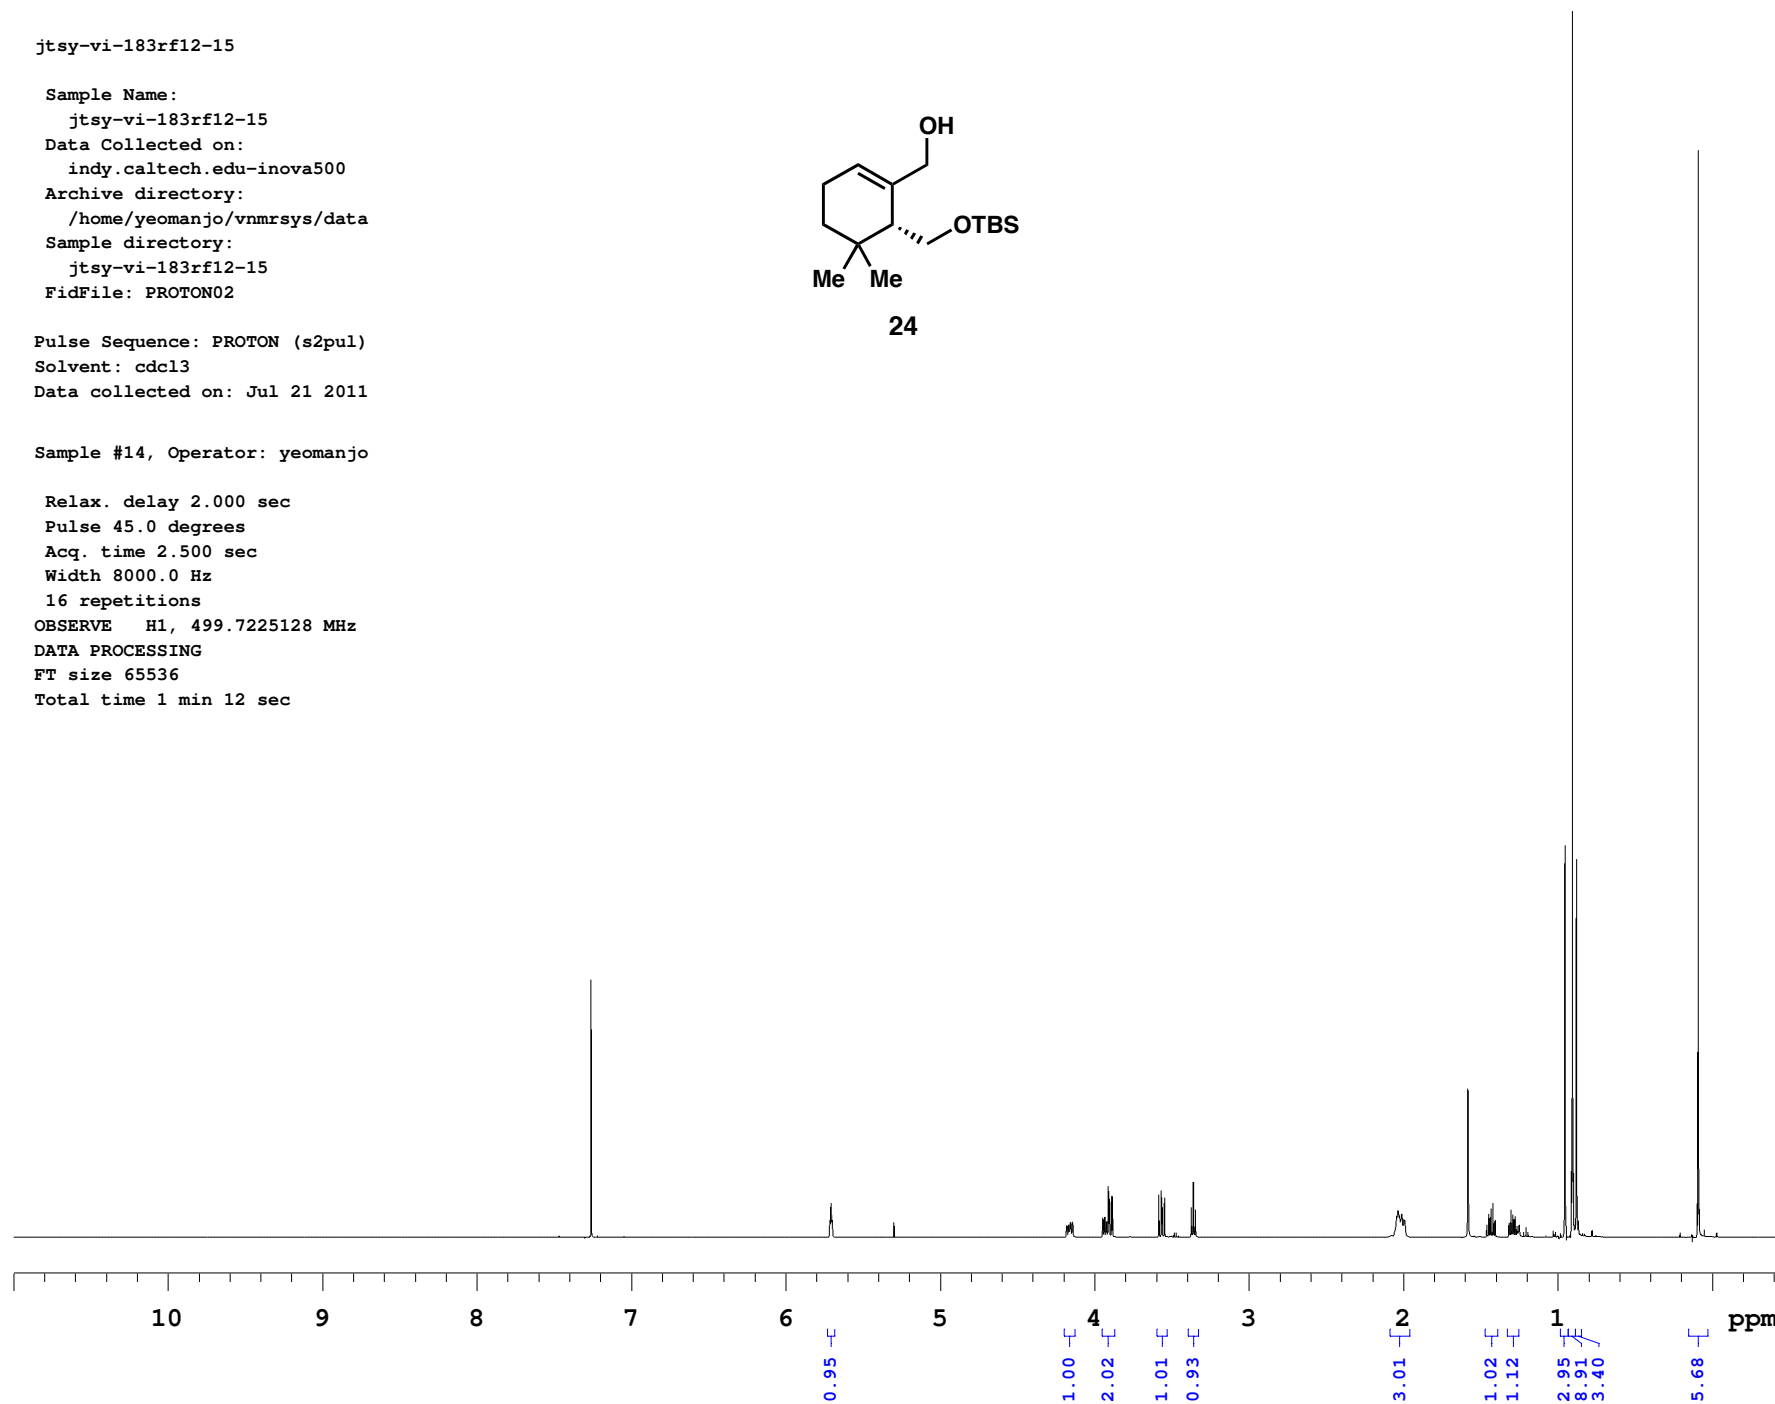

jtsy-vi-183rf12-15

Sample Name:

jtsy-vi-183rf12-15

Data Collected on:

indy.caltech.edu-inova500

Archive directory:

/home/yeomanjo/vnmrsys/data

Sample directory:

jtsy-vi-183rf12-15

FidFile: CARBON01

Pulse Sequence: CARBON (s2pul)

Solvent: cdc13

Data collected on: Jul 21 2011

Sample #14, Operator: yeomanjo

Relax. delay 1.000 sec

Pulse 45.0 degrees

Acq. time 1.042 sec

Width 31446.5 Hz

1700 repetitions

OBSERVE C13, 125.6553262 MHz

DECOUPLE H1, 499.7250019 MHz

Power 39 dB

continuously on

WALTZ-16 modulated

DATA PROCESSING

Line broadening 0.5 Hz

FT size 65536

Total time 58 min

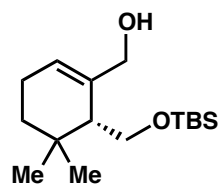

24

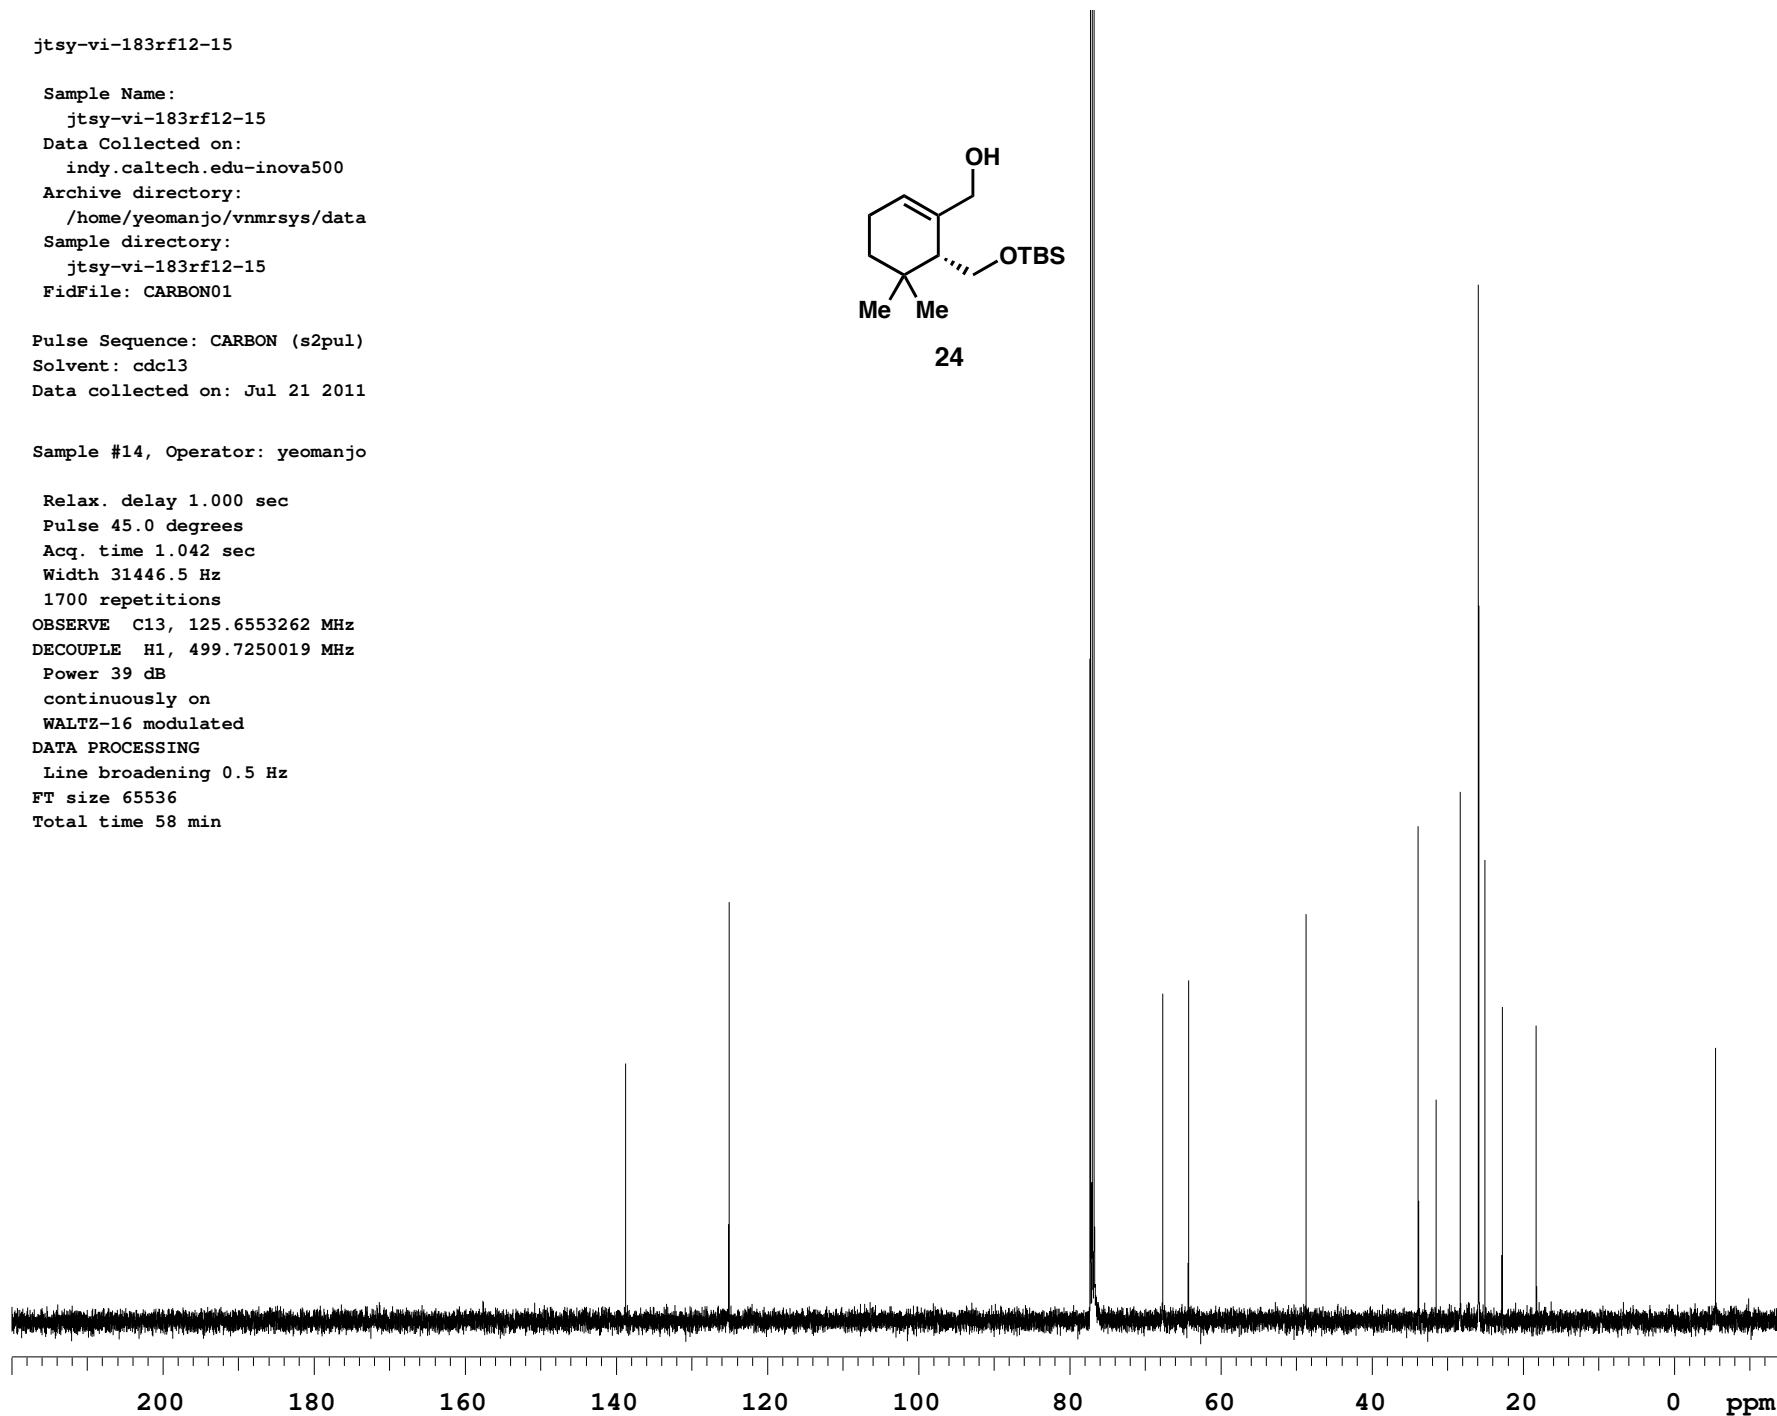

dep-spirolactone-rf

Sample Name:

dep-spirolactone-rf

Data Collected on:

indy.caltech.edu-inova500

Archive directory:

/home/yeomanjo/vnmrsys/data

Sample directory:

dep-spirolactone-rf

FidFile: PROTON01

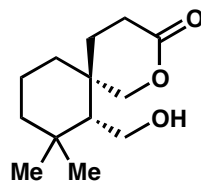

Pulse Sequence: PROTON (s2pul)

Solvent: cdc13

Data collected on: Jul 20 2011

Sample #33, Operator: yeomanjo

Relax. delay 2.000 sec

Pulse 45.0 degrees

Acq. time 2.500 sec

Width 8000.0 Hz

16 repetitions

OBSERVE H1, 499.7225033 MHz

DATA PROCESSING

Line broadening 0.2 Hz

FT size 65536

Total time 1 min 12 sec

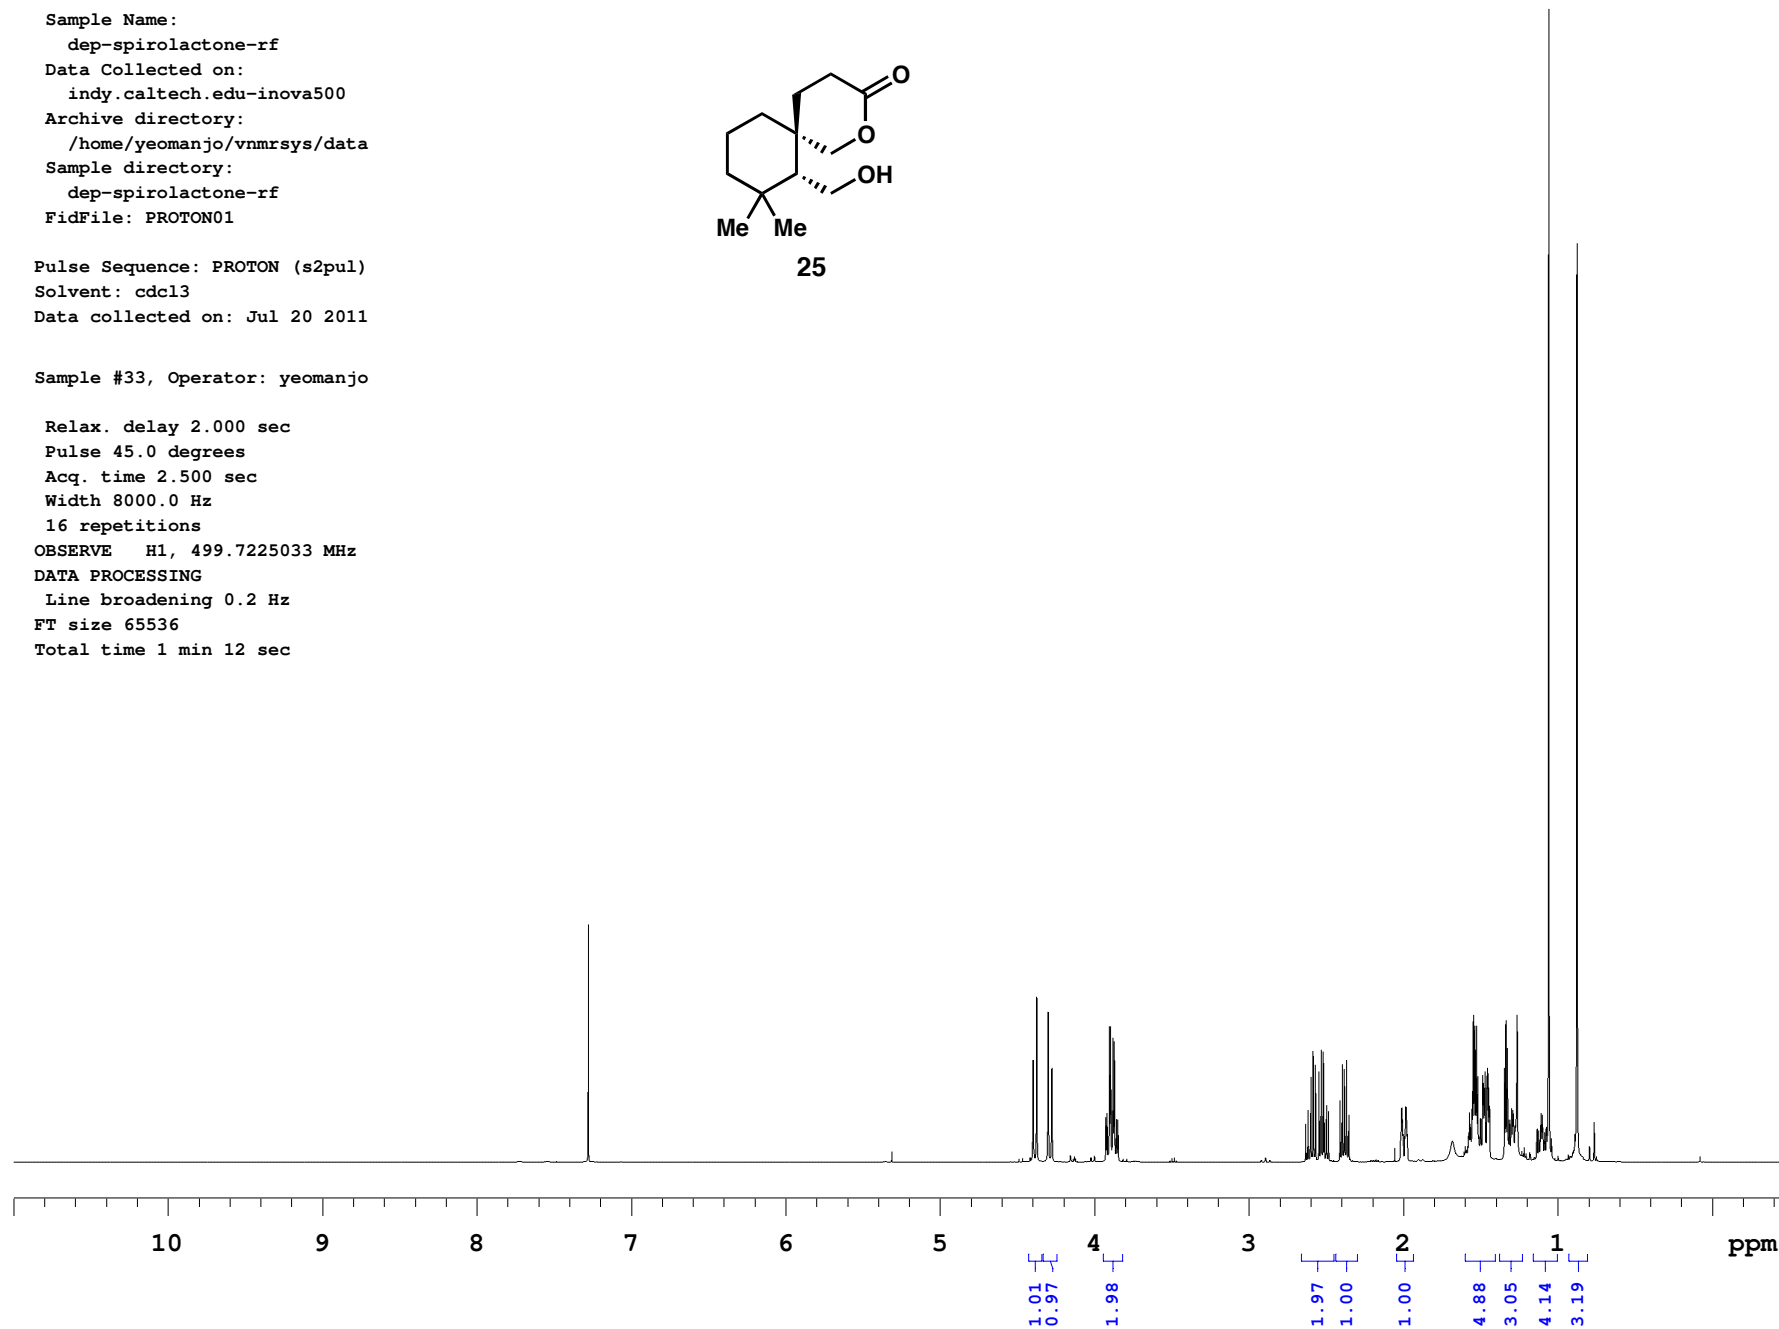



dep-spirolactone-rf

Sample Name:

dep-spirolactone-rf

Data Collected on:

indy.caltech.edu-inova500

Archive directory:

/home/yeomanjo/vnmrsys/data

Sample directory:

dep-spirolactone-rf

FidFile: CARBON01

Pulse Sequence: CARBON (s2pul)

Solvent: cdc13

Data collected on: Jul 20 2011

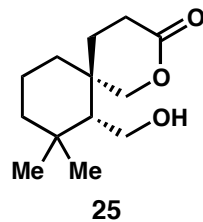

Sample #33, Operator: yeomanjo

Relax. delay 2.000 sec

Pulse 45.0 degrees

Acq. time 1.042 sec

Width 31446.5 Hz

1160 repetitions

OBSERVE C13, 125.6553291 MHz

DECOUPLE H1, 499.7250019 MHz

Power 39 dB

continuously on

WALTZ-16 modulated

DATA PROCESSING

Line broadening 0.5 Hz

FT size 65536

Total time 58 min

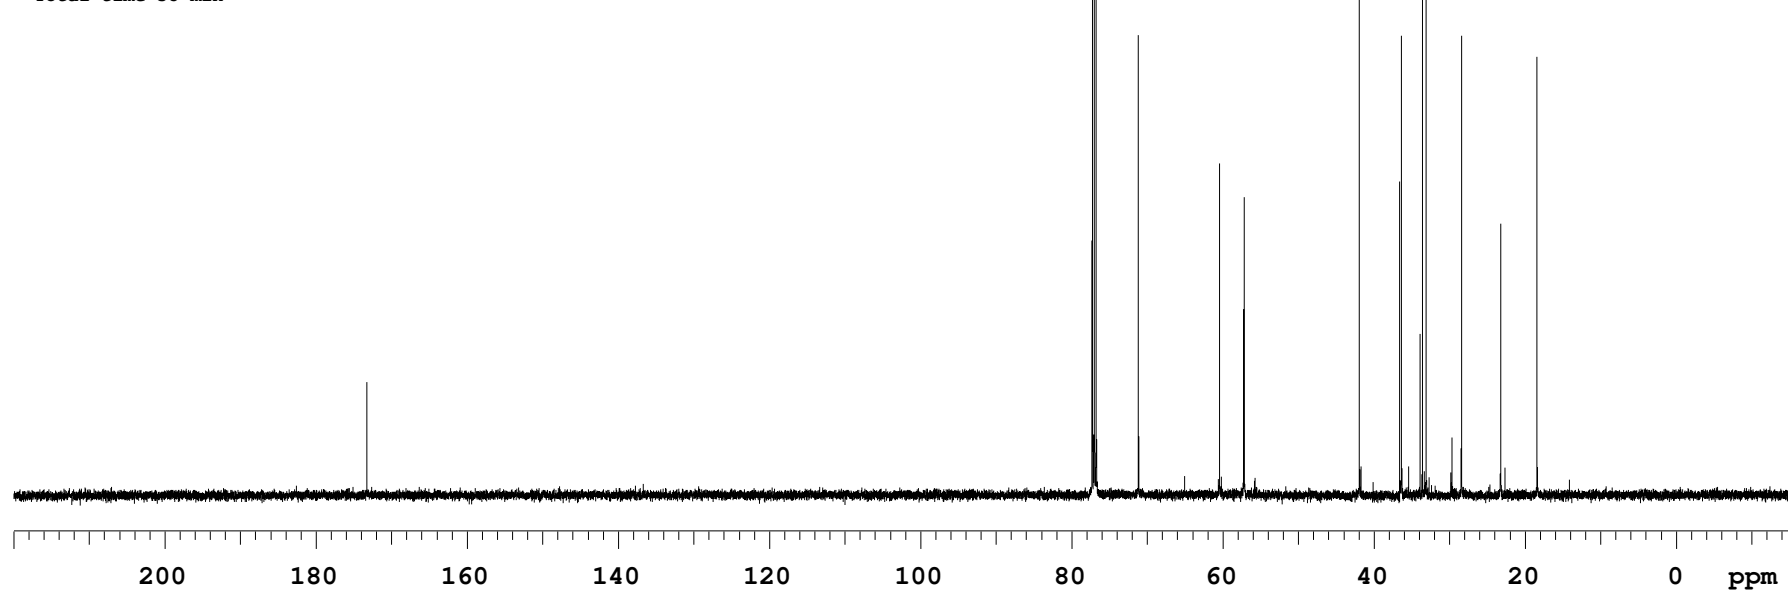

jc-1-210-A

Sample Name:

jc-1-210-A

Data Collected on:

indy.caltech.edu-inova500

Archive directory:

/home/jcha/vnmrsys/data

Sample directory:

jc-1-210-A

FidFile: PROTON01

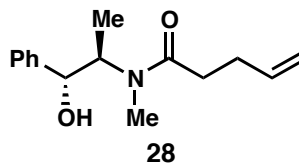

Pulse Sequence: PROTON (s2pul)

Solvent: cdc13

Data collected on: Apr 8 2011

Temp. 25.0 C / 298.1 K

Sample #41, Operator: jcha

Relax. delay 1.000 sec

Pulse 45.0 degrees

Acq. time 2.500 sec

Width 8000.0 Hz

64 repetitions

OBSERVE H1, 499.7290121 MHz

DATA PROCESSING

Line broadening 0.2 Hz

FT size 65536

Total time 3 min 45 sec

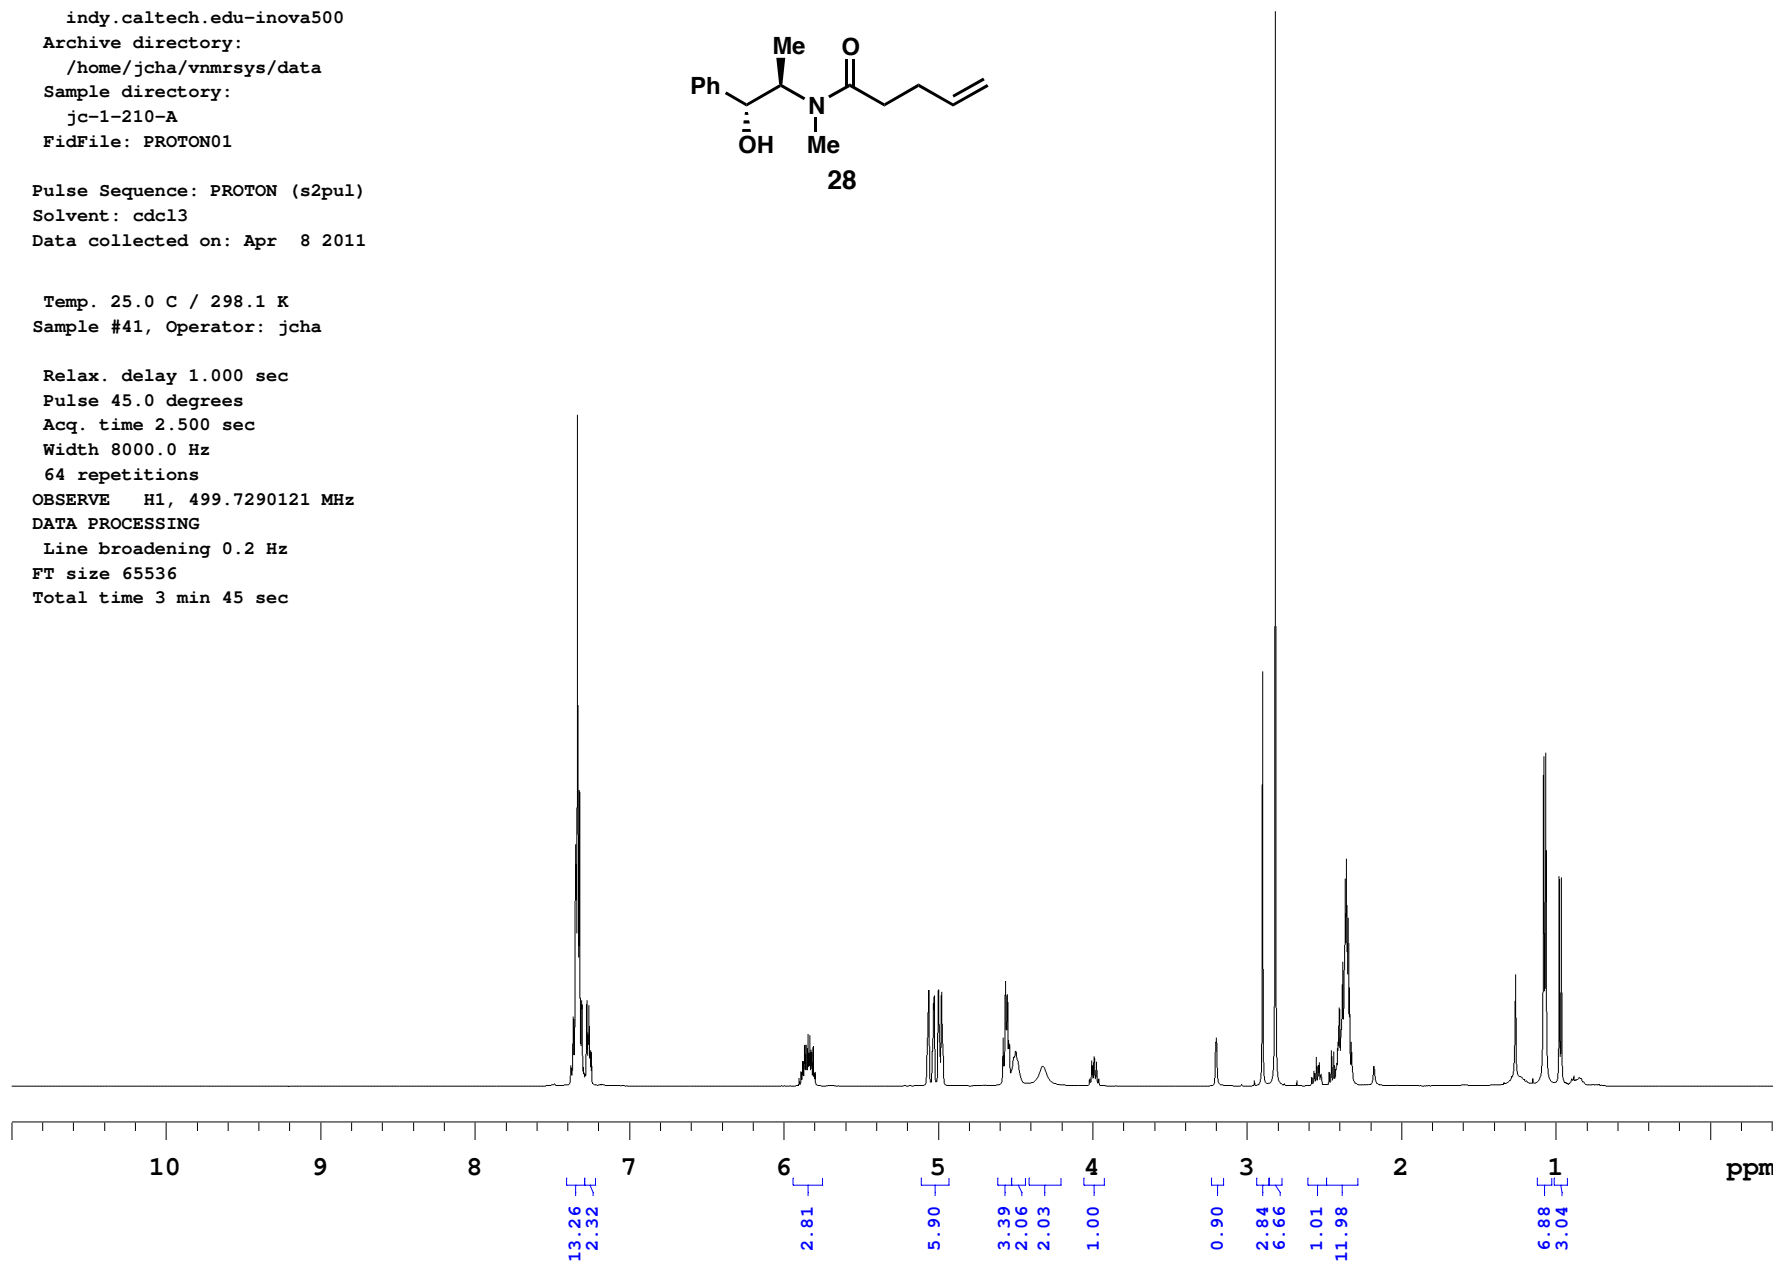

jc-1-210-A

Sample Name:

jc-1-210-A

Data Collected on:

indy.caltech.edu-inova500

Archive directory:

/home/jcha/vnmrsys/data

Sample directory:

jc-1-210-A

FidFile: CARBON01

Pulse Sequence: CARBON (s2pul)

Solvent: cdc13

Data collected on: Apr 8 2011

Temp. 25.0 C / 298.1 K

Sample #41, Operator: jcha

Relax. delay 1.000 sec

Pulse 45.0 degrees

Acq. time 1.042 sec

Width 31446.5 Hz

512 repetitions

OBSERVE C13, 125.6569729 MHz

DECOUPLE H1, 499.7315163 MHz

Power 39 dB

continuously on

WALTZ-16 modulated

DATA PROCESSING

Line broadening 0.5 Hz

FT size 65536

Total time 17 min

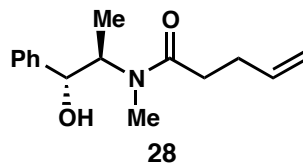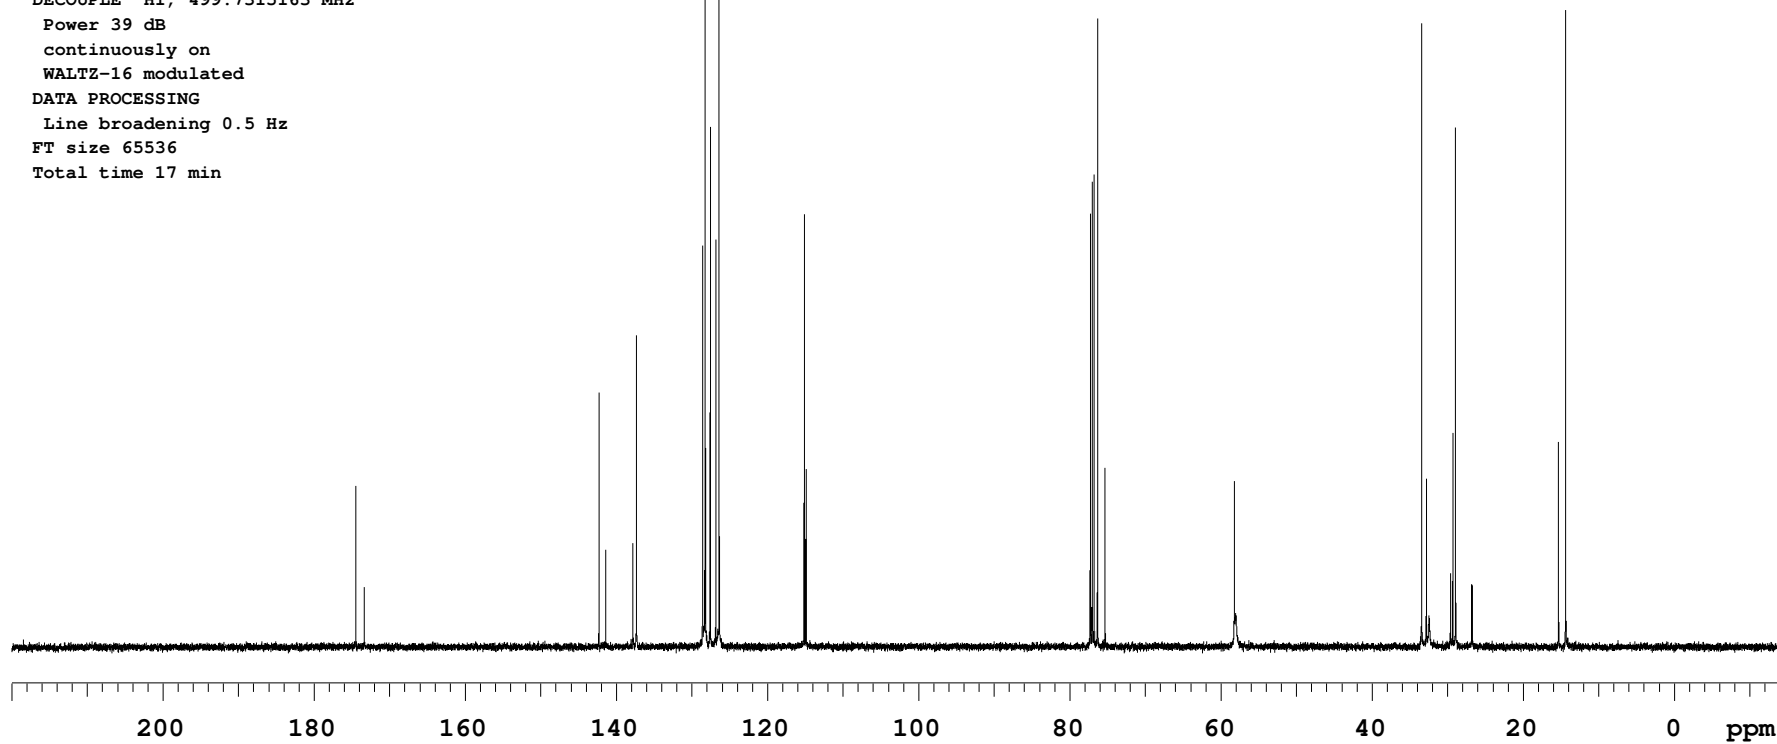

jc-1-231-A

Sample Name:

jc-1-231-A

Data Collected on:

indy.caltech.edu-inova500

Archive directory:

/home/jcha/vnmrsys/data

Sample directory:

jc-1-231-A

FidFile: PROTON03

Pulse Sequence: PROTON (s2pul)

Solvent: cdcl3

Data collected on: Apr 2 2011

Temp. 25.0 C / 298.1 K

Sample #33, Operator: jcha

Relax. delay 1.000 sec

Pulse 45.0 degrees

Acq. time 2.500 sec

Width 8000.0 Hz

64 repetitions

OBSERVE H1, 499.7290190 MHz

DATA PROCESSING

Line broadening 0.2 Hz

FT size 65536

Total time 3 min 45 sec

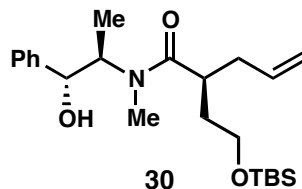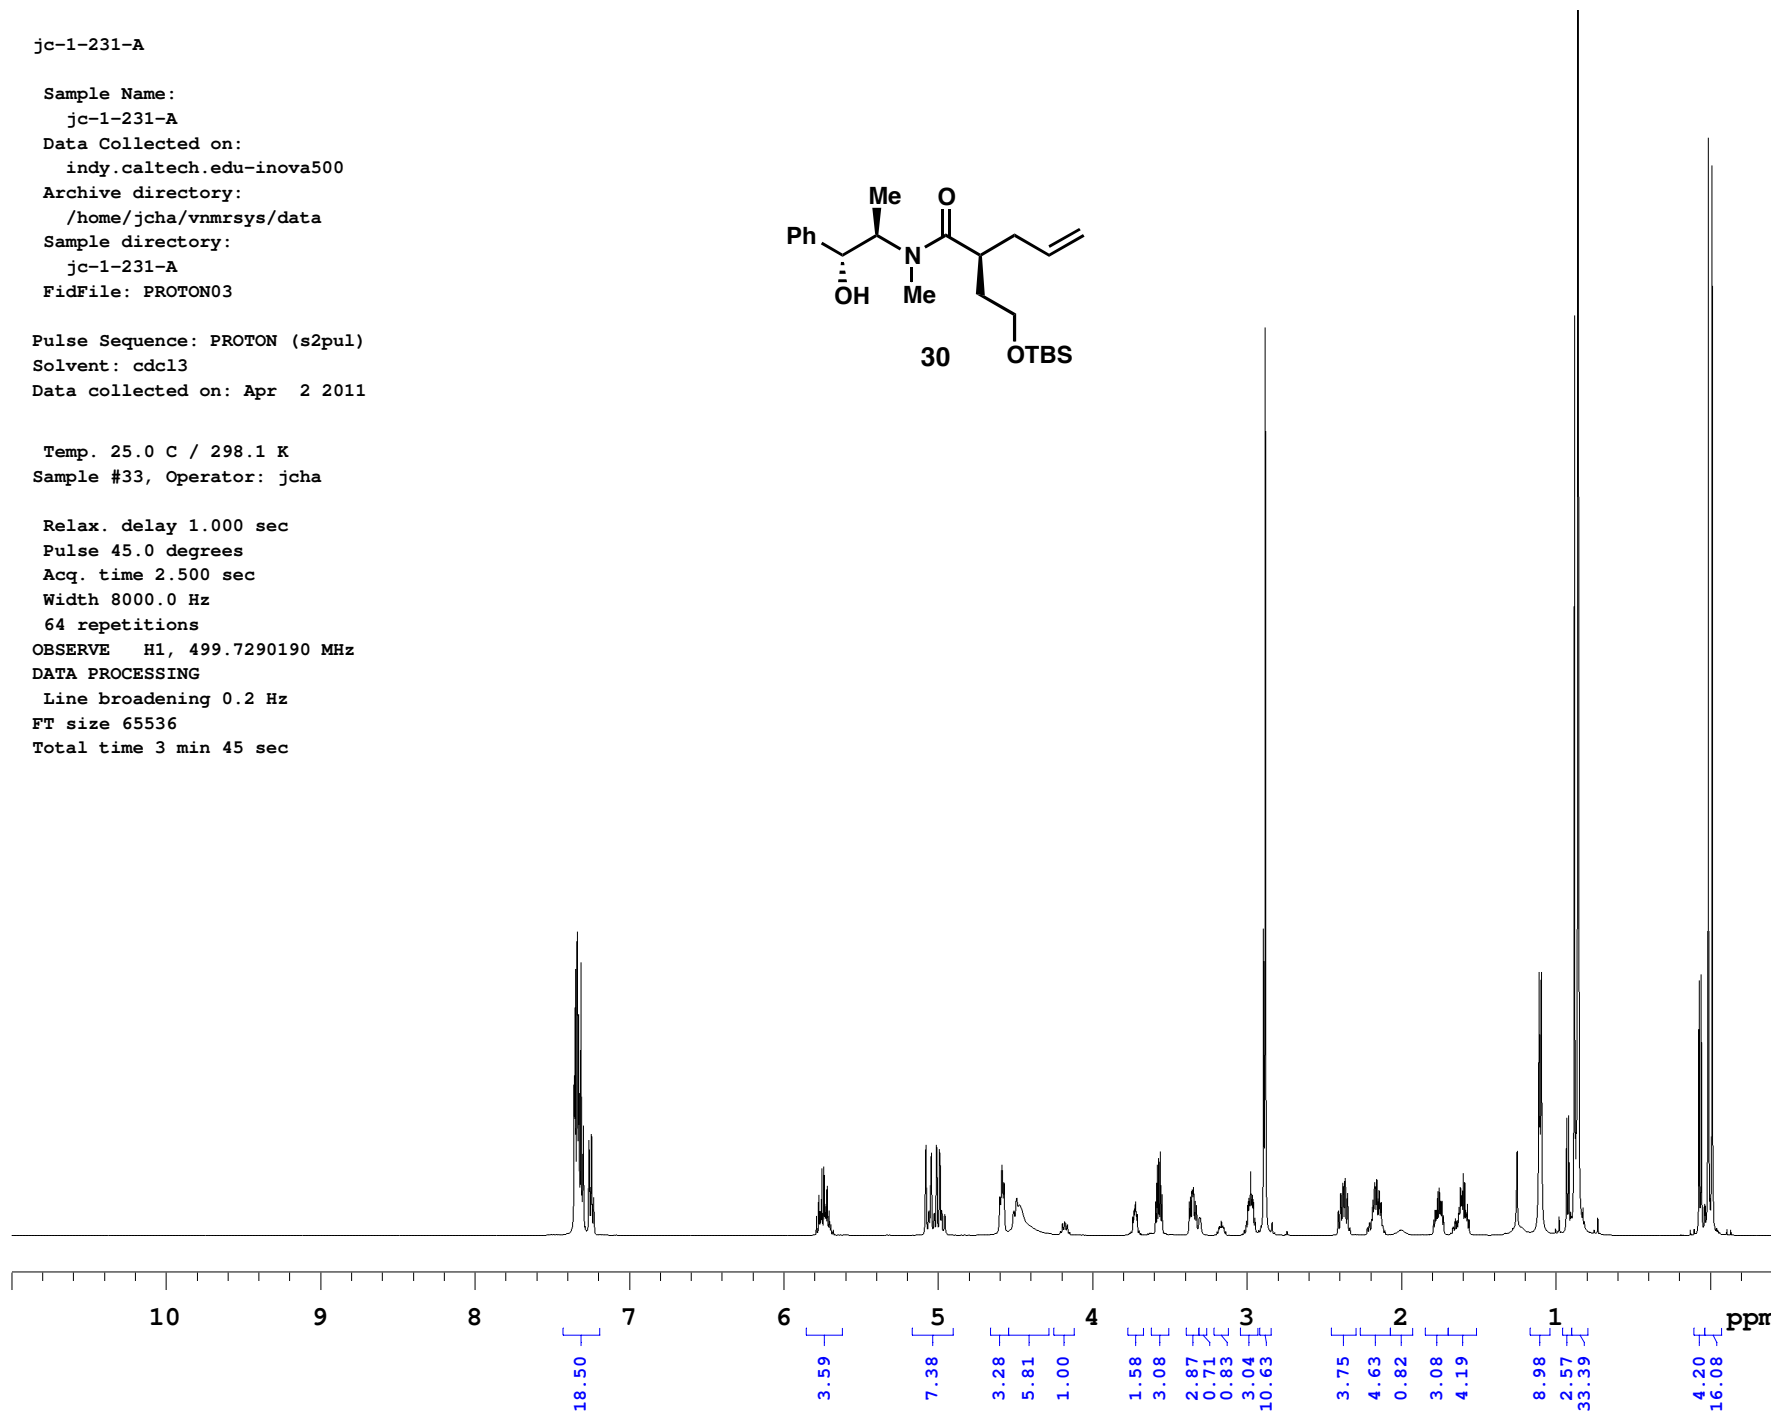

jc-1-231-A

Sample Name:

jc-1-231-A

Data Collected on:

indy.caltech.edu-inova500

Archive directory:

/home/jcha/vnmrsys/data

Sample directory:

jc-1-231-A

FidFile: CARBON02

Pulse Sequence: CARBON (s2pul)

Solvent: cdc13

Data collected on: Apr 2 2011

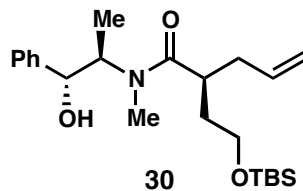

Temp. 25.0 C / 298.1 K

Sample #33, Operator: jcha

Relax. delay 1.000 sec

Pulse 45.0 degrees

Acq. time 1.042 sec

Width 31446.5 Hz

512 repetitions

OBSERVE C13, 125.6569671 MHz

DECOUPLE H1, 499.7315163 MHz

Power 39 dB

continuously on

WALTZ-16 modulated

DATA PROCESSING

Line broadening 0.5 Hz

FT size 65536

Total time 17 min

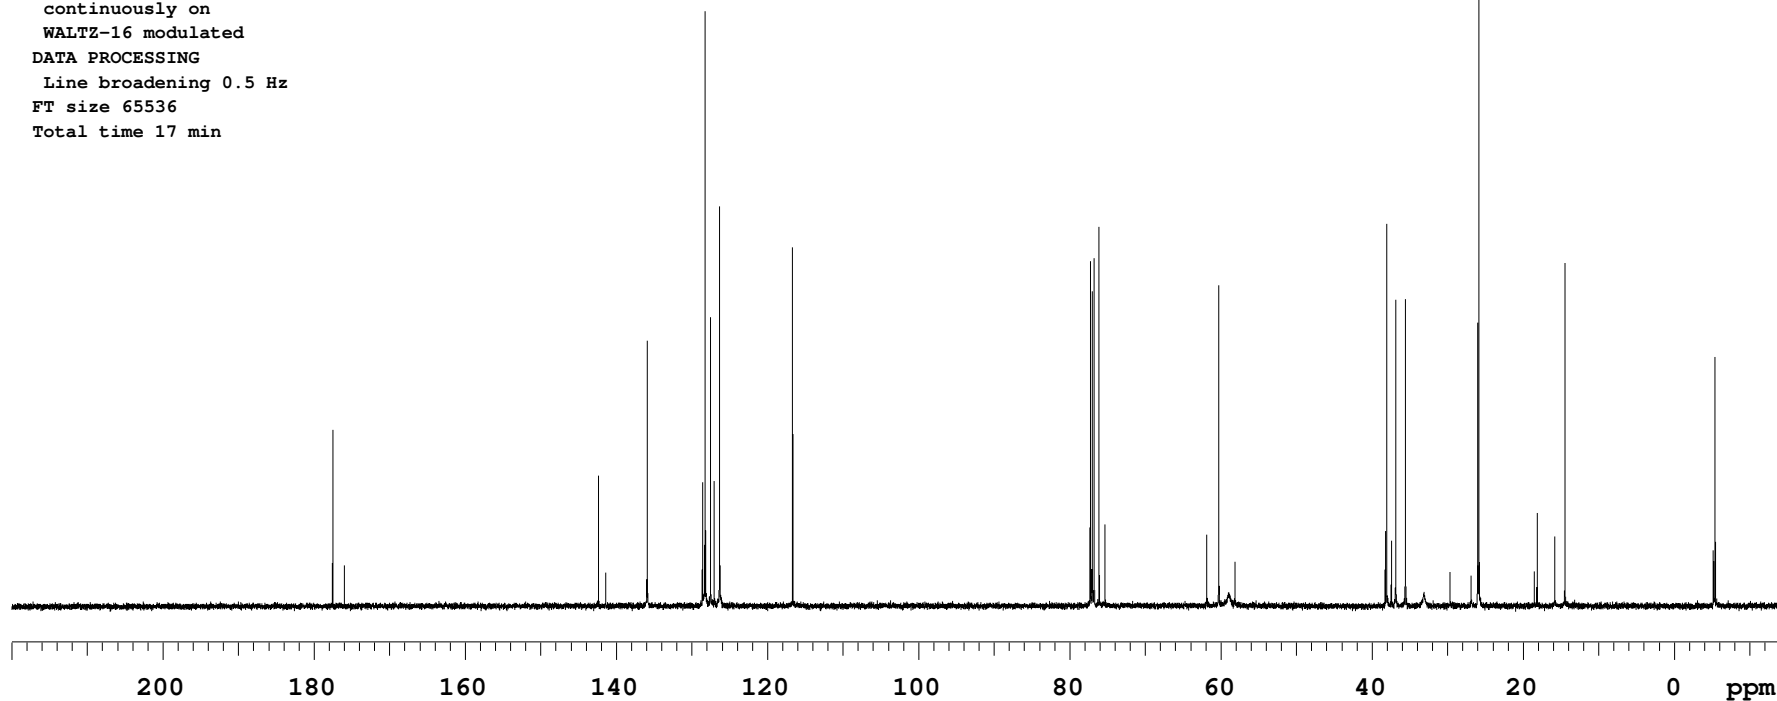

jc-1-241-A

Sample Name:

jc-1-241-A

Data Collected on:

indy.caltech.edu-inova500

Archive directory:

/home/jcha/vnmrsys/data

Sample directory:

jc-1-241-A

FidFile: PROTON01

Pulse Sequence: PROTON (s2pul)

Solvent: cdc13

Data collected on: Mar 21 2011

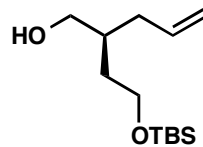

SI-2

Temp. 25.0 C / 298.1 K

Sample #33, Operator: jcha

Relax. delay 1.000 sec

Pulse 45.0 degrees

Acq. time 2.500 sec

Width 8000.0 Hz

32 repetitions

OBSERVE H1, 499.7290203 MHz

DATA PROCESSING

Line broadening 0.2 Hz

FT size 65536

Total time 1 min 52 sec

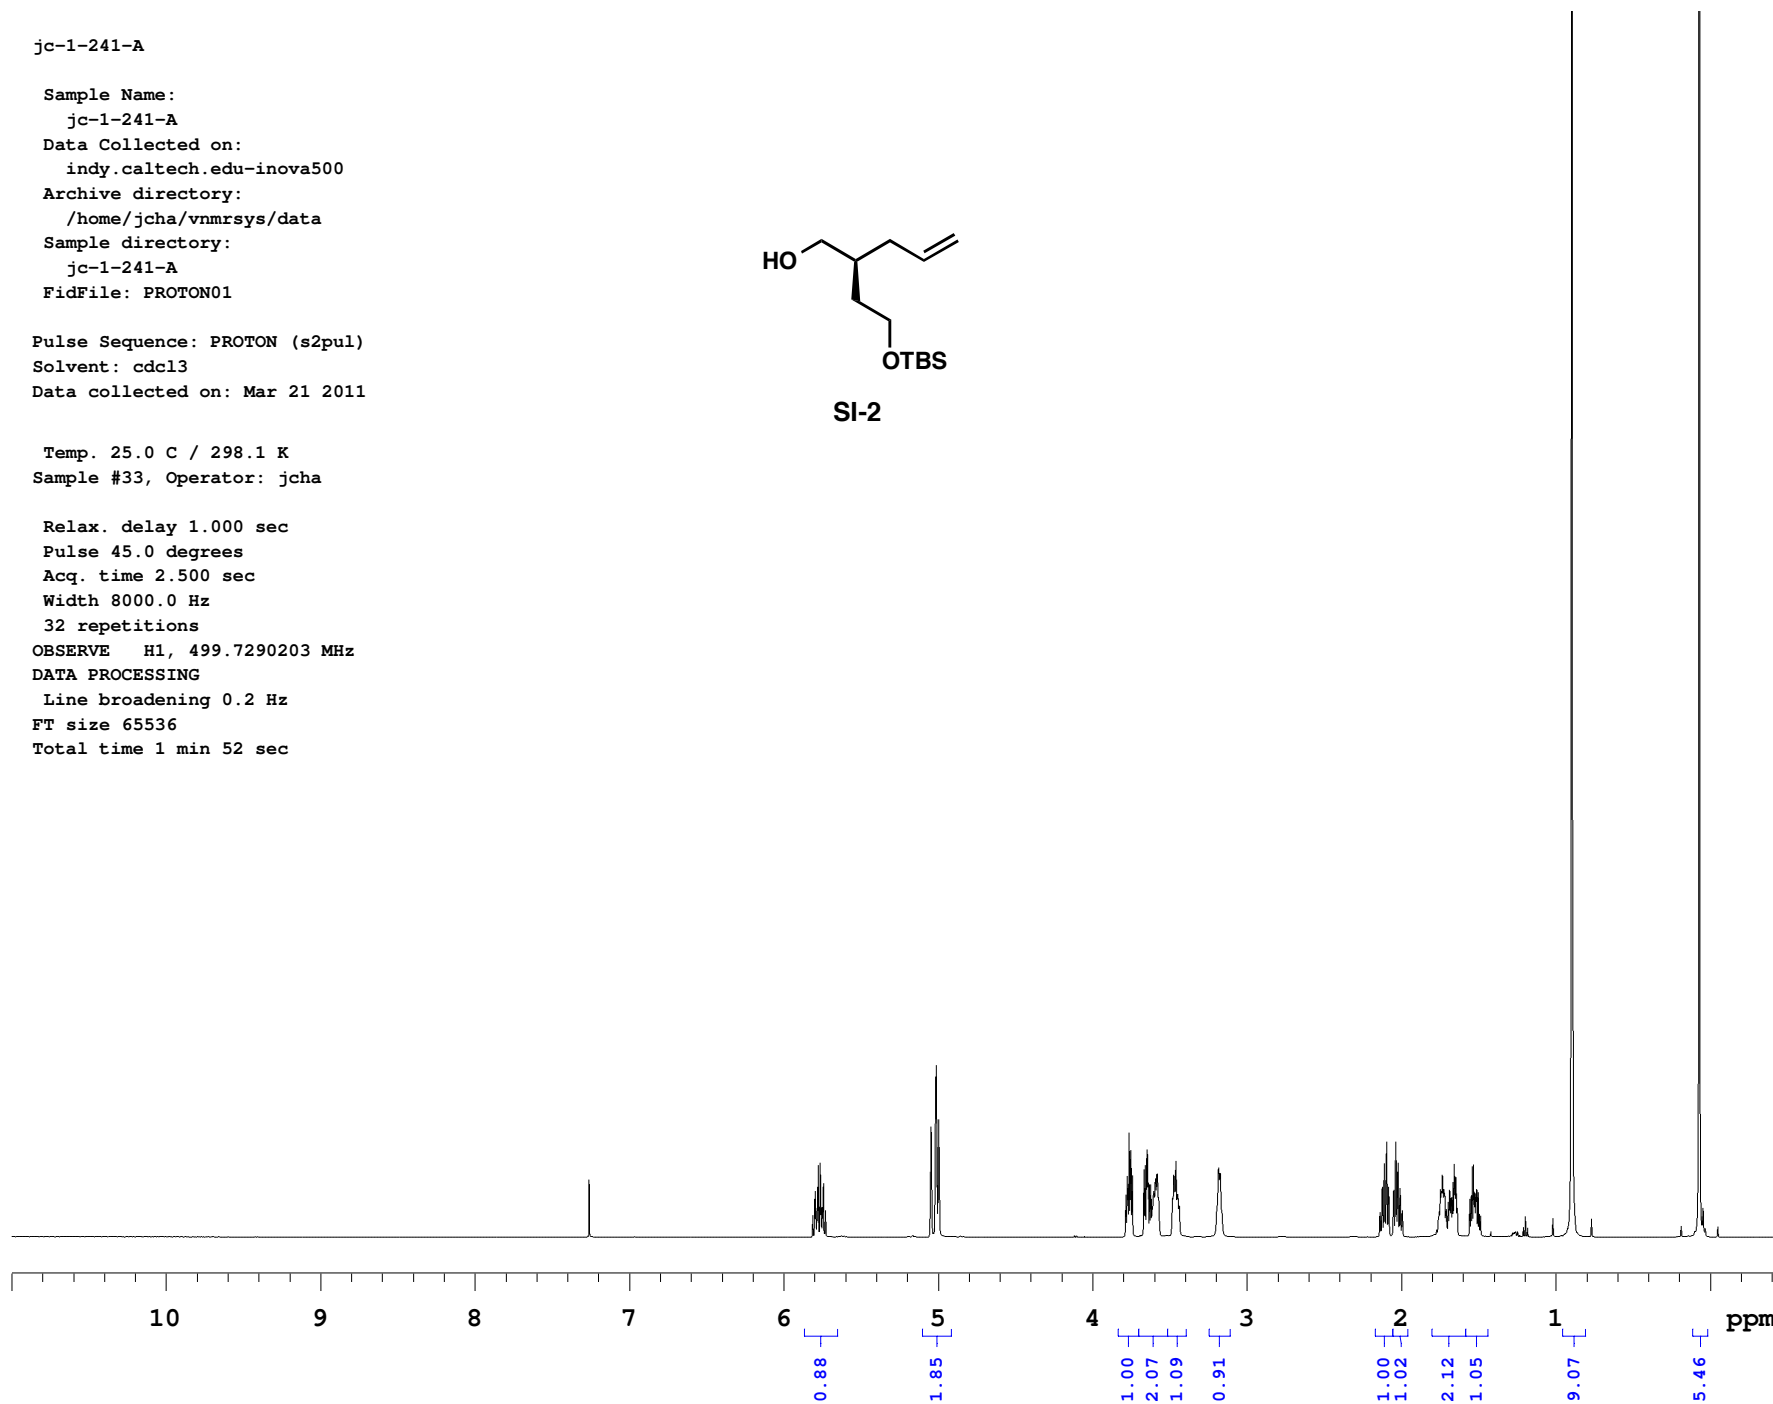

jc-1-241-A-carbon

Sample Name:

jc-1-241-A-carbon

Data Collected on:

indy.caltech.edu-inova500

Archive directory:

/home/jcha/vnmrsys/data

Sample directory:

jc-1-241-A-carbon

FidFile: CARBON01

Pulse Sequence: CARBON (s2pul)

Solvent: cdcl3

Data collected on: Mar 21 2011

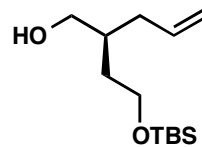

SI-2

Temp. 25.0 C / 298.1 K

Sample #33, Operator: jcha

Relax. delay 1.000 sec

Pulse 45.0 degrees

Acq. time 1.042 sec

Width 31446.5 Hz

1000 repetitions

OBSERVE C13, 125.6569623 MHz

DECOUPLE H1, 499.7315163 MHz

Power 39 dB

continuously on

WALTZ-16 modulated

DATA PROCESSING

Line broadening 0.5 Hz

FT size 65536

Total time 34 min

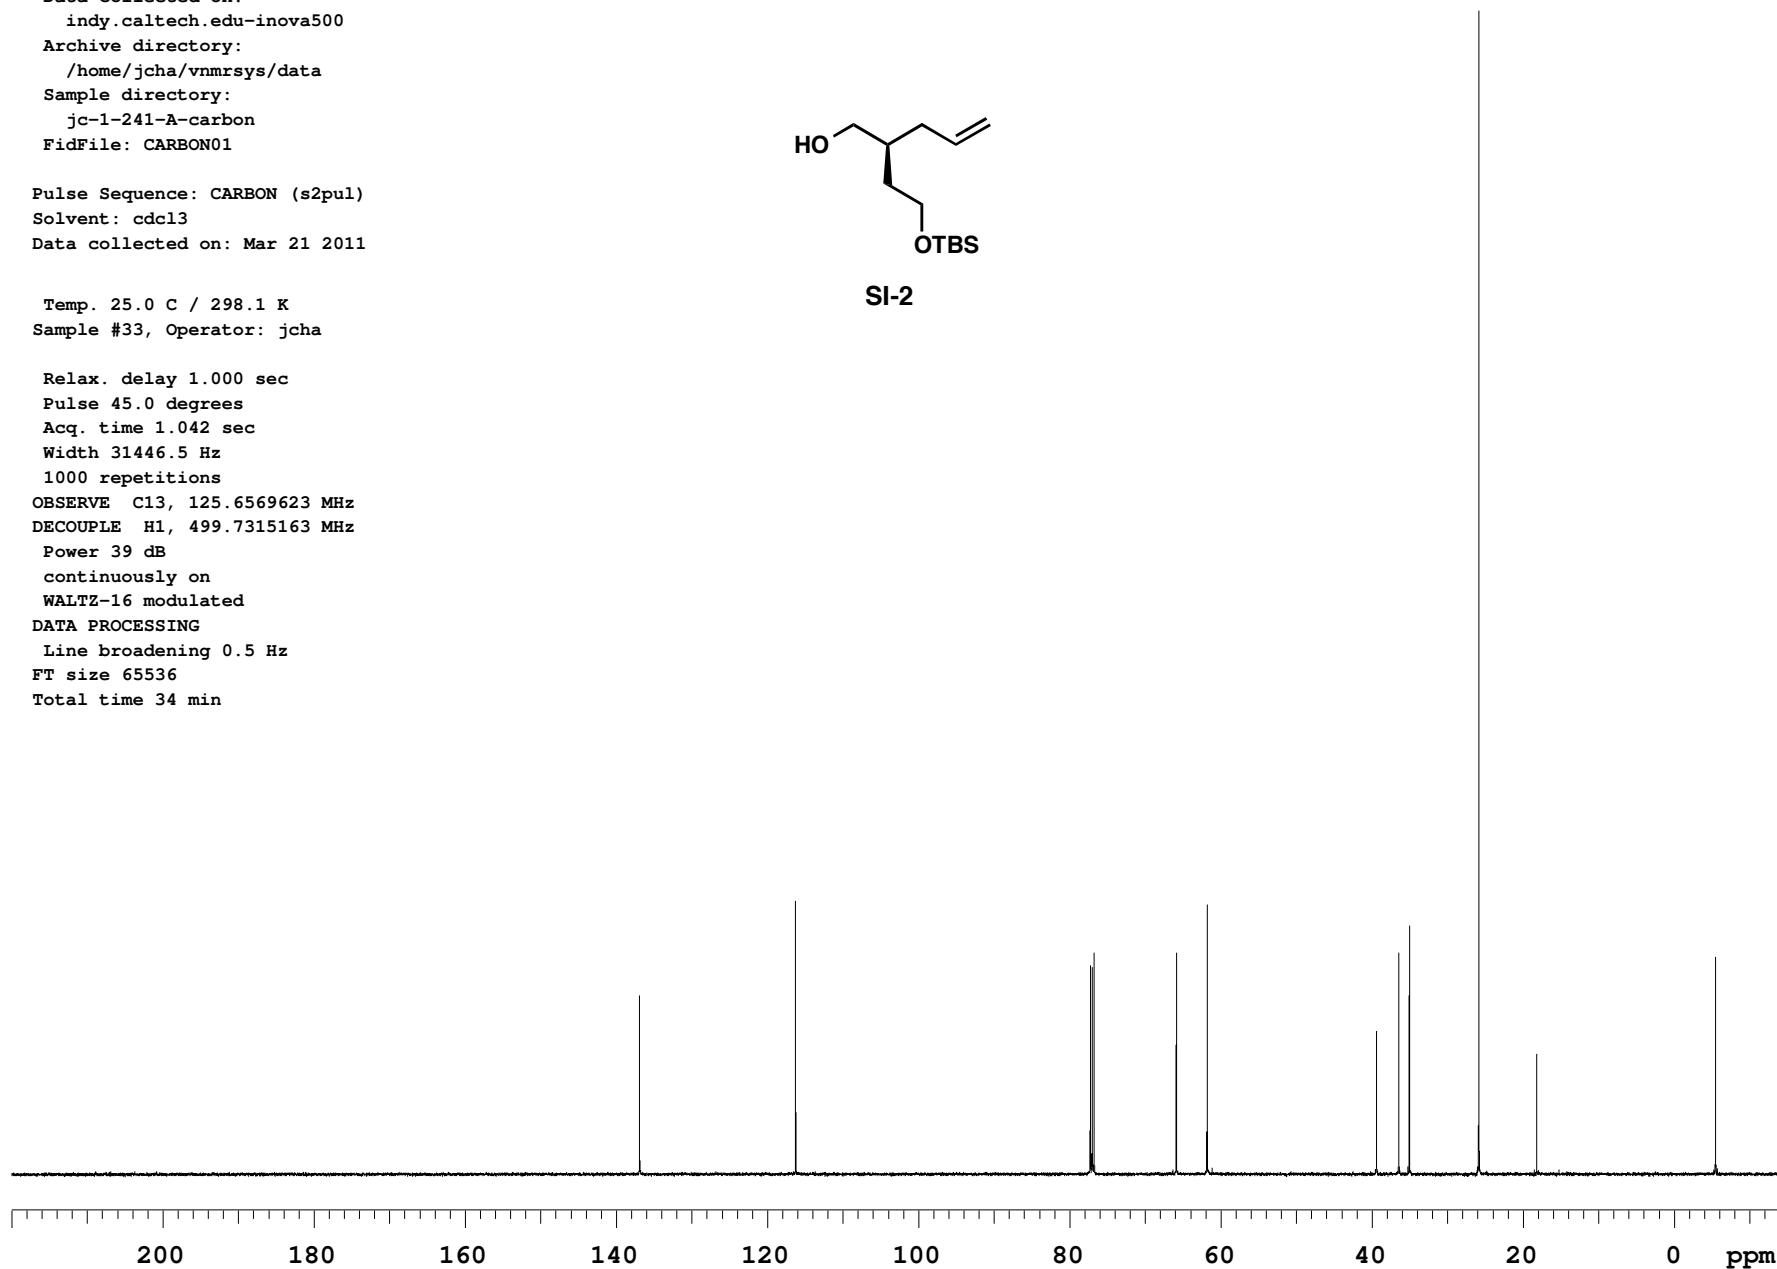

jc-1-251-A

Sample Name:

jc-1-251-A

Data Collected on:

indy.caltech.edu-inova500

Archive directory:

/home/jcha/vnmrsys/data

Sample directory:

jc-1-251-A

FidFile: PROTON02

Pulse Sequence: PROTON (s2pul)

Solvent: cdc13

Data collected on: Apr 13 2011

Temp. 25.0 C / 298.1 K

Sample #40, Operator: jcha

Relax. delay 1.000 sec

Pulse 45.0 degrees

Acq. time 2.500 sec

Width 8000.0 Hz

32 repetitions

OBSERVE H1, 499.7290203 MHz

DATA PROCESSING

Line broadening 0.2 Hz

FT size 65536

Total time 1 min 52 sec

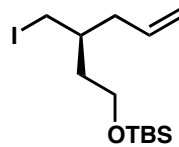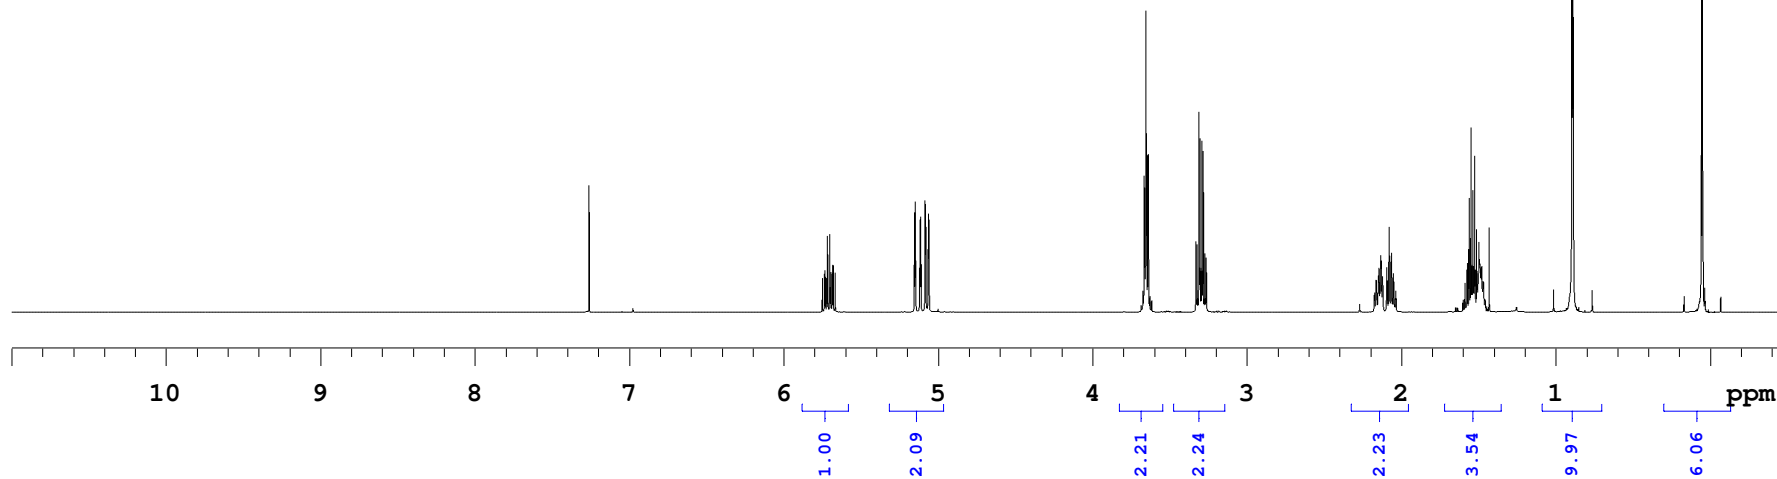



jc-1-251-A

Sample Name:

jc-1-251-A

Data Collected on:

indy.caltech.edu-inova500

Archive directory:

/home/jcha/vnmrsys/data

Sample directory:

jc-1-251-A

FidFile: CARBON02

Pulse Sequence: CARBON (s2pul)

Solvent: cdcl3

Data collected on: Apr 13 2011

Temp. 25.0 C / 298.1 K

Sample #40, Operator: jcha

Relax. delay 1.000 sec

Pulse 45.0 degrees

Acq. time 1.042 sec

Width 31446.5 Hz

512 repetitions

OBSERVE C13, 125.6569623 MHz

DECOUPLE H1, 499.7315163 MHz

Power 39 dB

continuously on

WALTZ-16 modulated

DATA PROCESSING

Line broadening 0.5 Hz

FT size 65536

Total time 17 min

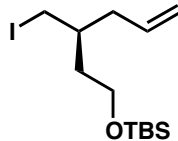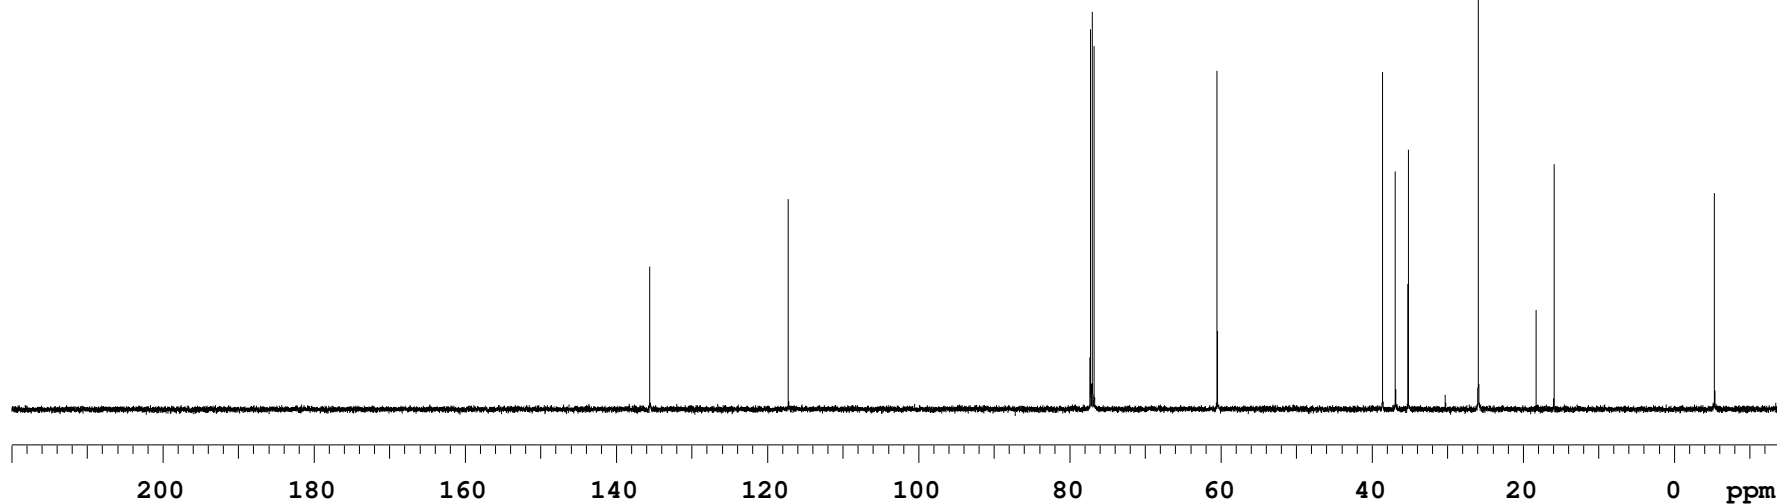

jc-1-253-A

Sample Name:

jc-1-253-A

Data Collected on:

indy.caltech.edu-inova500

Archive directory:

/home/jcha/vnmrsys/data

Sample directory:

jc-1-253-A

FidFile: PROTON02

Pulse Sequence: PROTON (s2pul)

Solvent: cdc13

Data collected on: Jul 20 2011

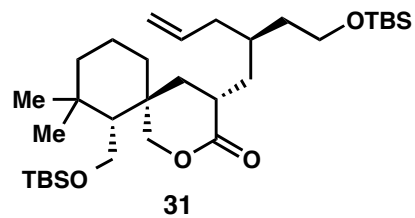

less polar diastereomer

Sample #1, Operator: jcha

Relax. delay 2.000 sec

Pulse 45.0 degrees

Acq. time 2.500 sec

Width 8000.0 Hz

16 repetitions

OBSERVE H1, 499.7225125 MHz

DATA PROCESSING

Line broadening 0.2 Hz

FT size 65536

Total time 1 min 12 sec

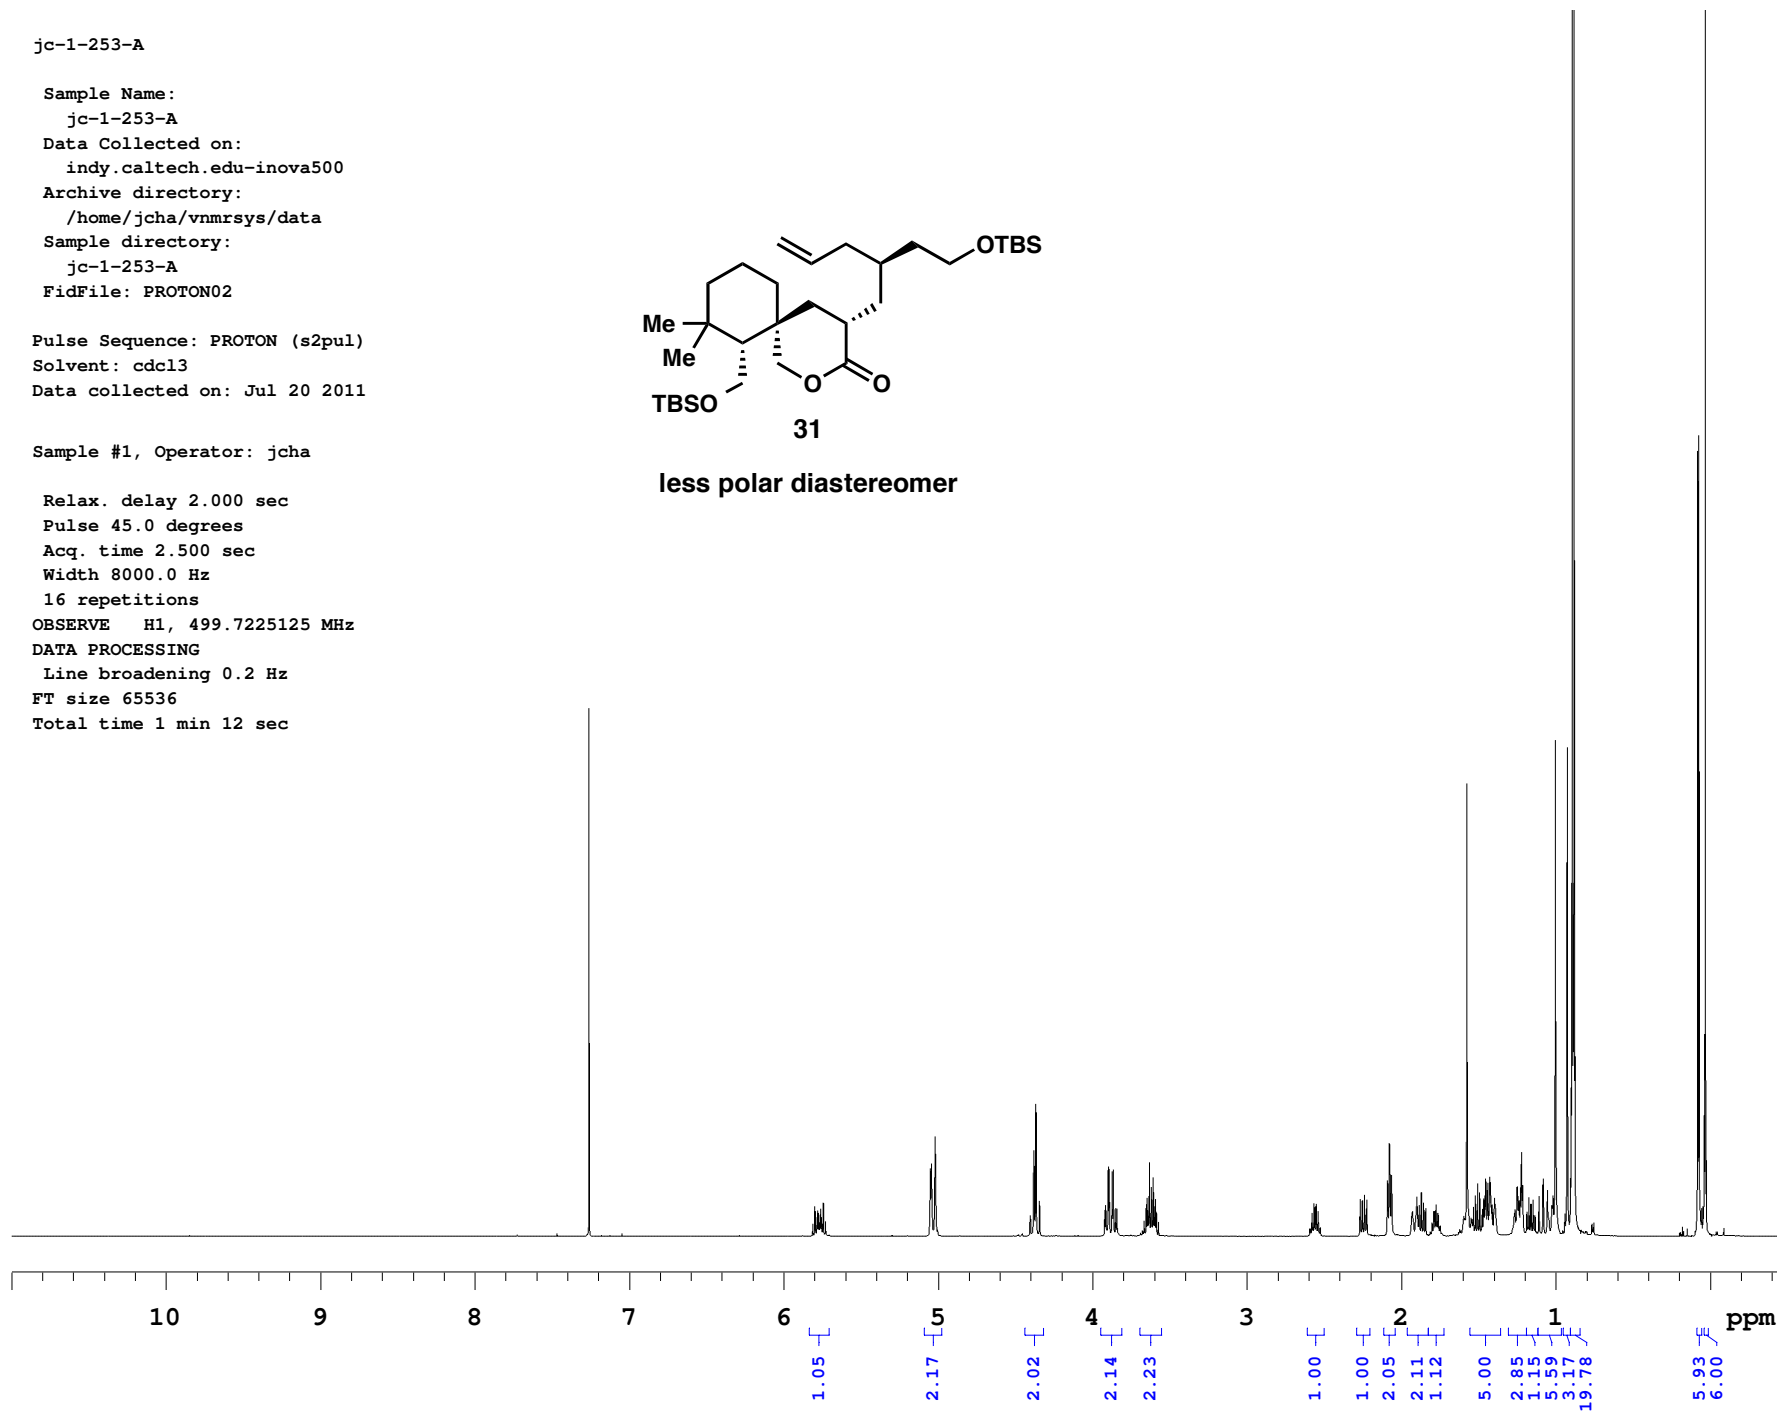

jc-1-253-A

Sample Name:

jc-1-253-A

Data Collected on:

indy.caltech.edu-inova500

Archive directory:

/home/jcha/vnmrsys/data

Sample directory:

jc-1-253-A

FidFile: CARBON01

Pulse Sequence: CARBON (s2pul)

Solvent: cdc13

Data collected on: Jul 20 2011

Sample #1, Operator: jcha

Relax. delay 2.000 sec

Pulse 45.0 degrees

Acq. time 1.042 sec

Width 31446.5 Hz

1000 repetitions

OBSERVE C13, 125.6553262 MHz

DECOUPLE H1, 499.7250019 MHz

Power 39 dB

continuously on

WALTZ-16 modulated

DATA PROCESSING

Line broadening 0.5 Hz

FT size 65536

Total time 50 min

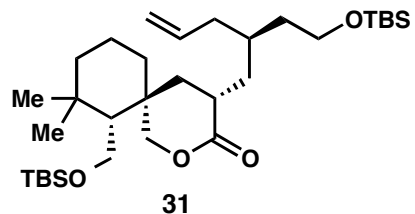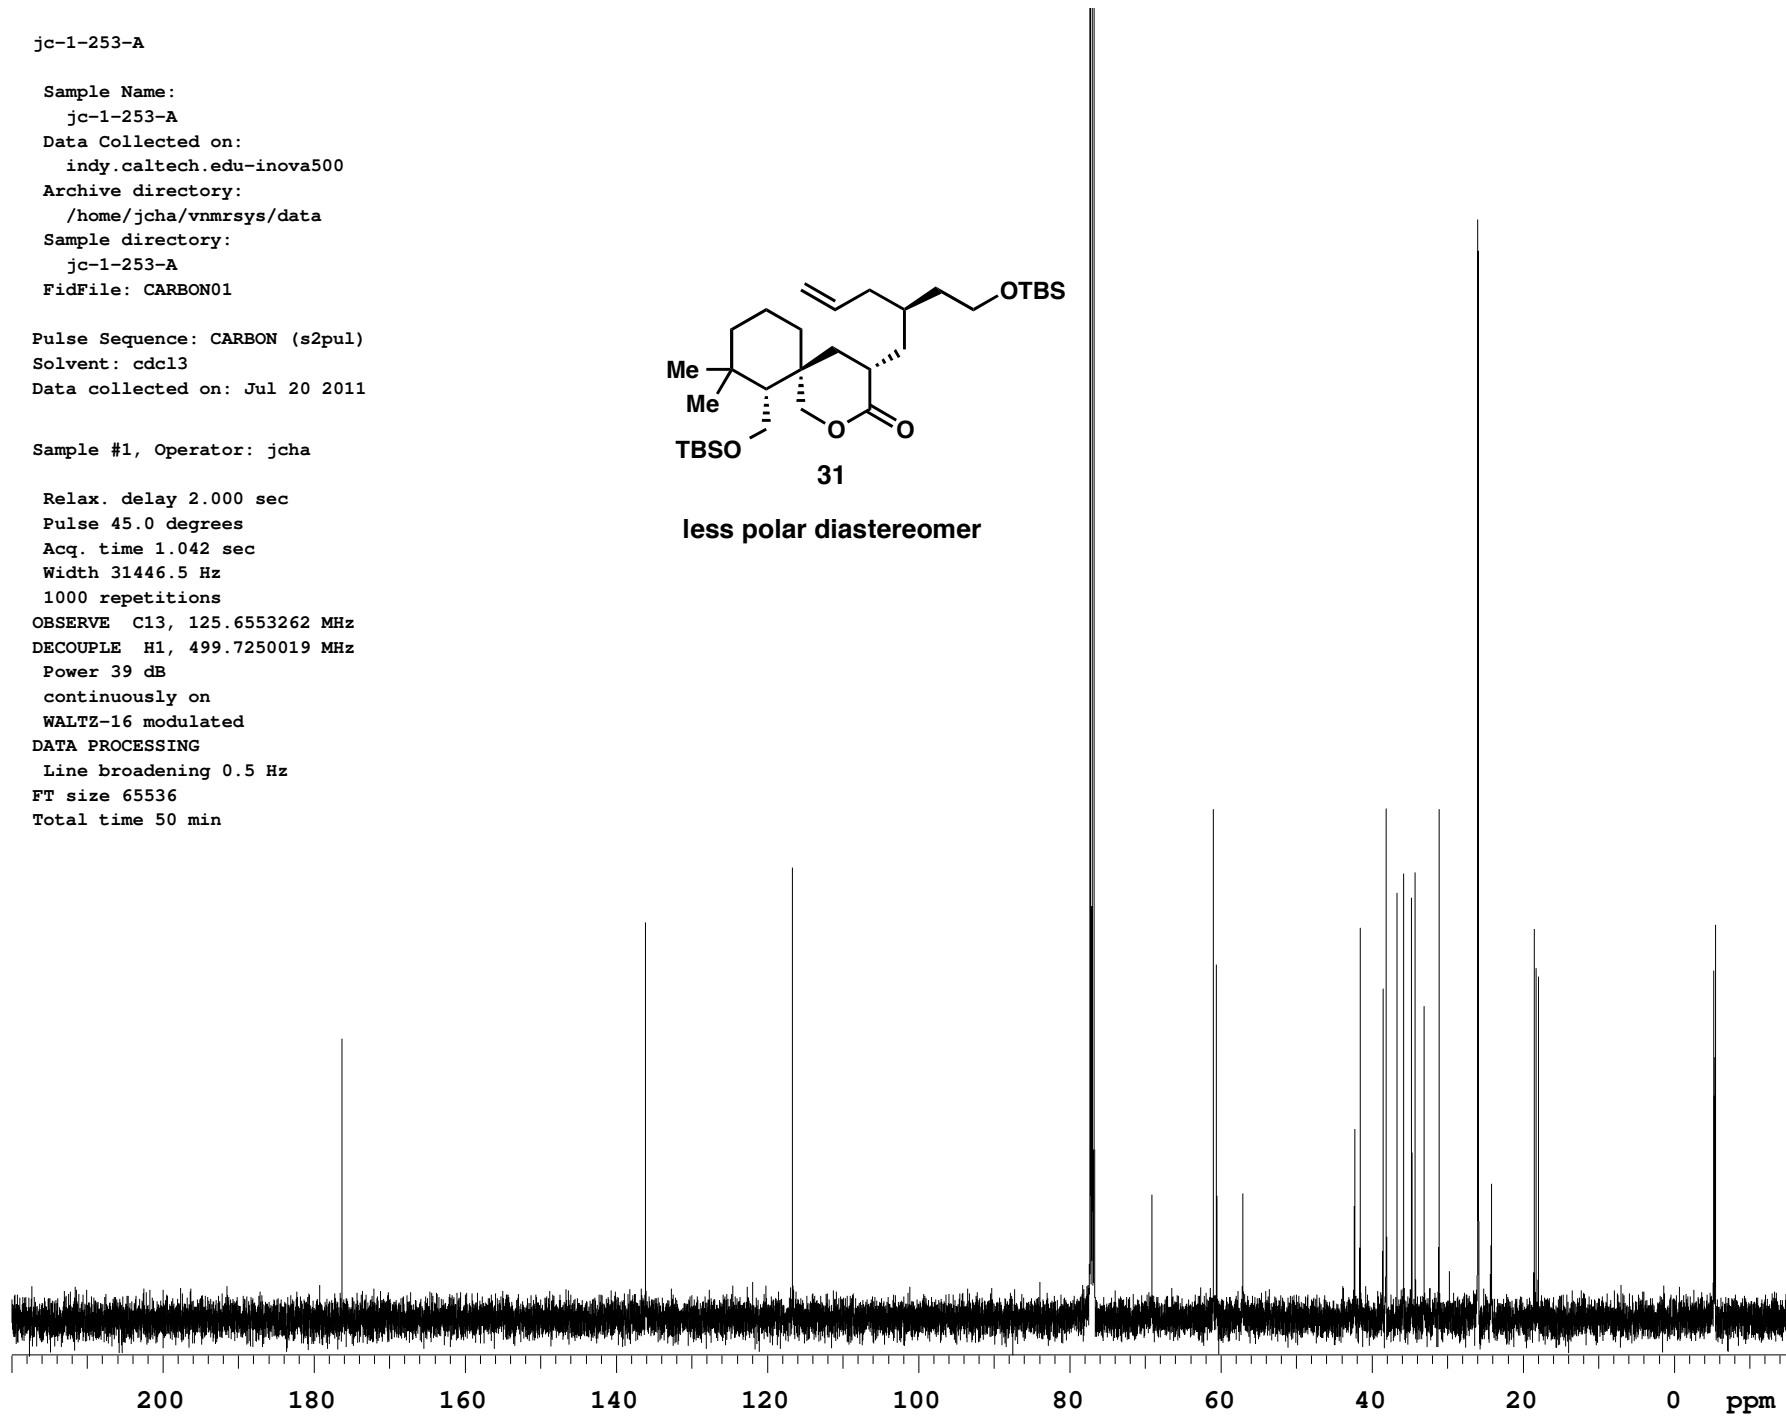

jc-1-253-B

Sample Name:  
jc-1-253-B  
Data Collected on:  
indy.caltech.edu-inova500  
Archive directory:  
/home/jcha/vnmrsys/data  
Sample directory:  
jc-1-253-B  
FidFile: PROTON01

Pulse Sequence: PROTON (s2pul)  
Solvent: cdc13  
Data collected on: Apr 13 2011

Temp. 25.0 C / 298.1 K  
Sample #15, Operator: jcha

Relax. delay 1.000 sec  
Pulse 45.0 degrees  
Acq. time 2.500 sec  
Width 8000.0 Hz  
32 repetitions  
OBSERVE H1, 499.7290203 MHz  
DATA PROCESSING  
Line broadening 0.2 Hz  
FT size 65536  
Total time 1 min 52 sec

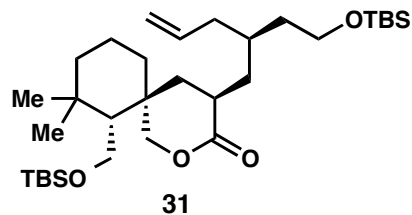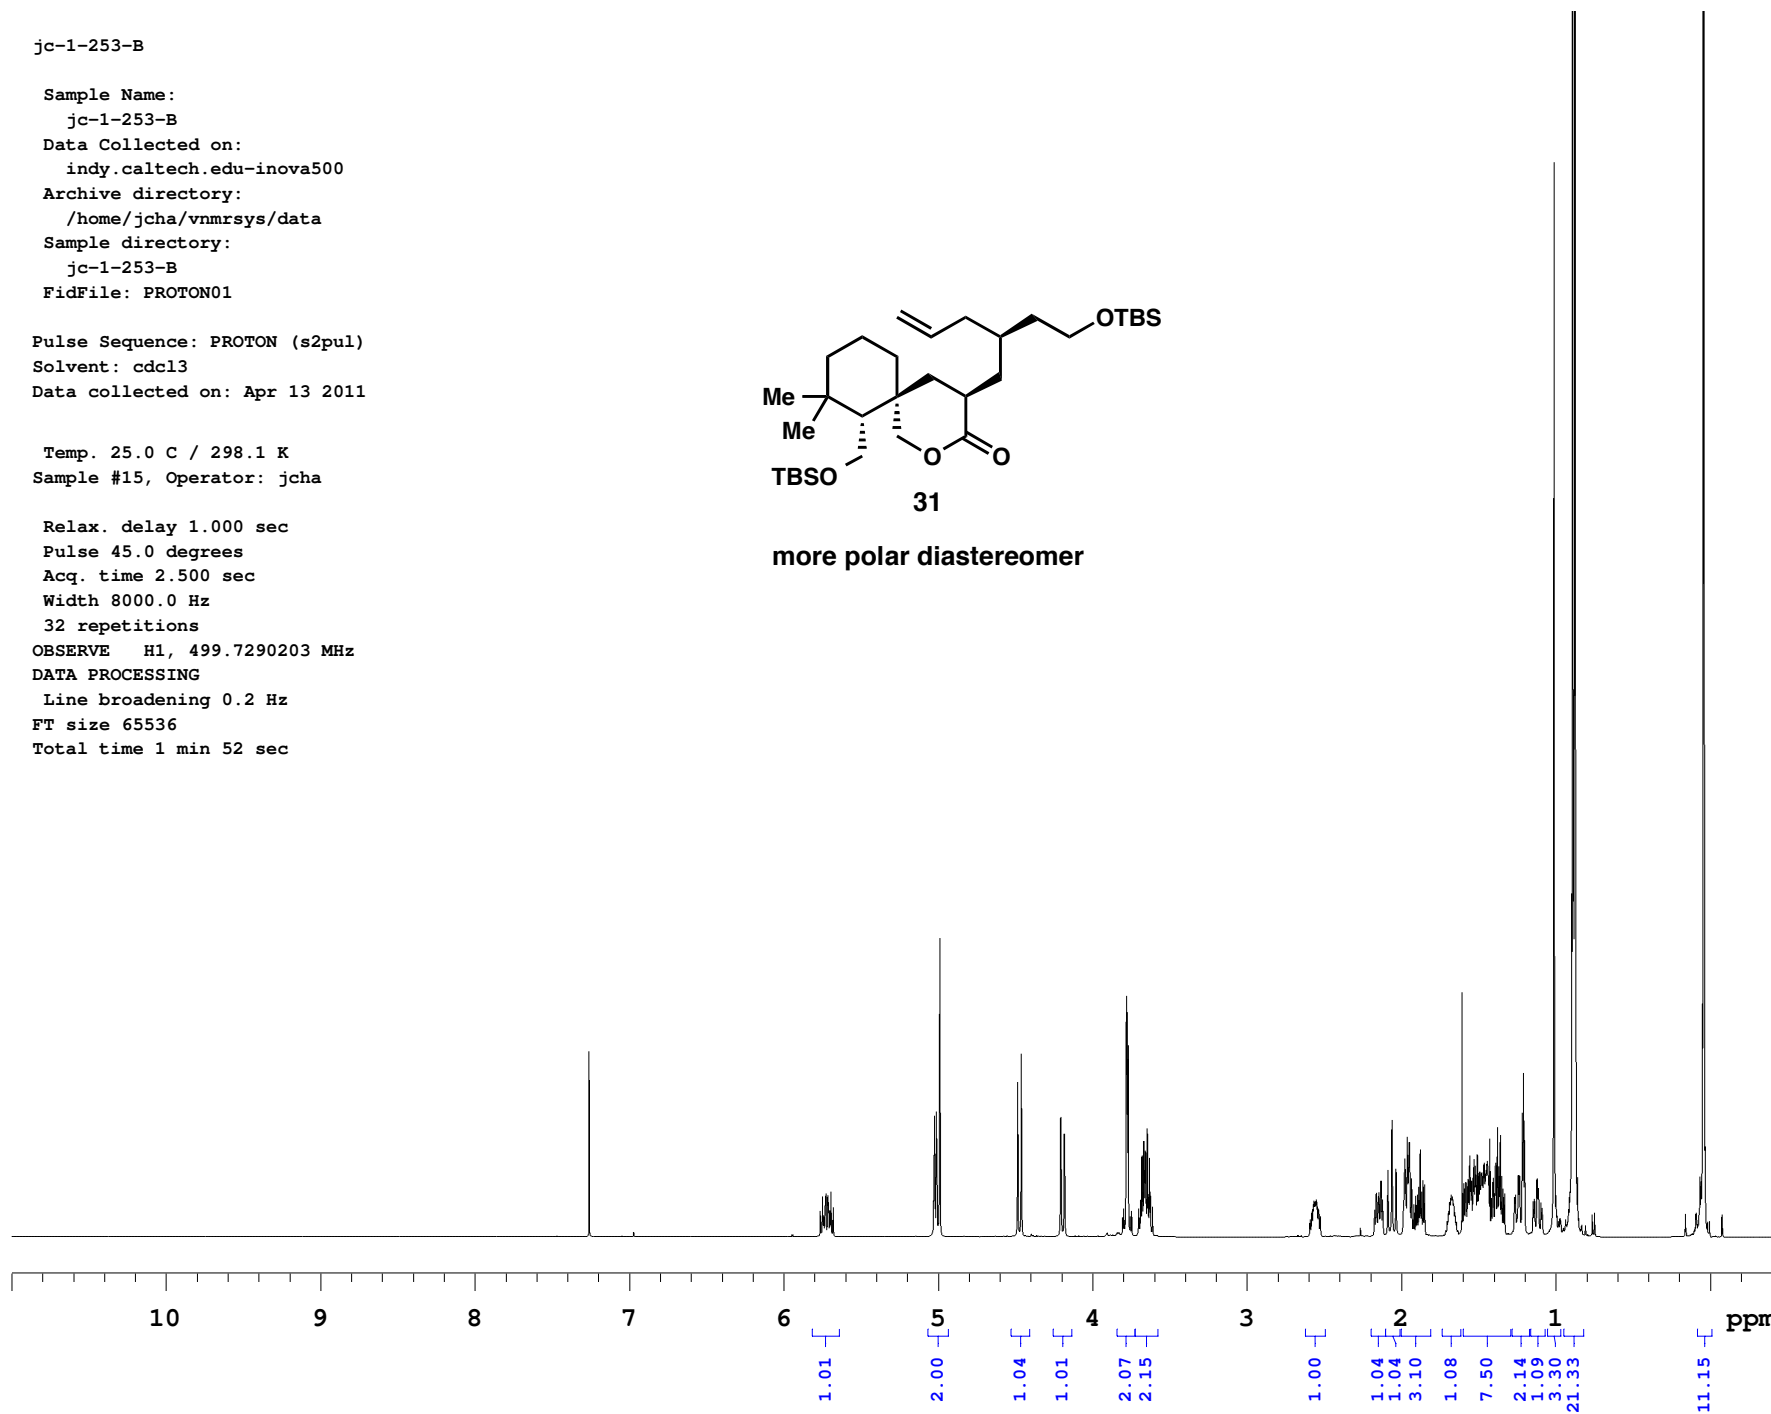

jc-1-253-B

Sample Name:

jc-1-253-B

Data Collected on:

indy.caltech.edu-inova500

Archive directory:

/home/jcha/vnmrsys/data

Sample directory:

jc-1-253-B

FidFile: CARBON01

Pulse Sequence: CARBON (s2pul)

Solvent: cdc13

Data collected on: Apr 13 2011

Temp. 25.0 C / 298.1 K

Sample #15, Operator: jcha

Relax. delay 1.000 sec

Pulse 45.0 degrees

Acq. time 1.042 sec

Width 31446.5 Hz

512 repetitions

OBSERVE C13, 125.6569623 MHz

DECOUPLE H1, 499.7315163 MHz

Power 39 dB

continuously on

WALTZ-16 modulated

DATA PROCESSING

Line broadening 0.5 Hz

FT size 65536

Total time 17 min

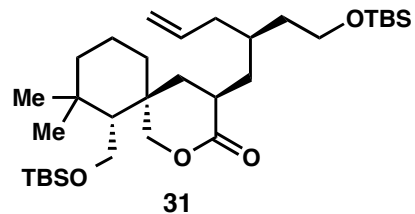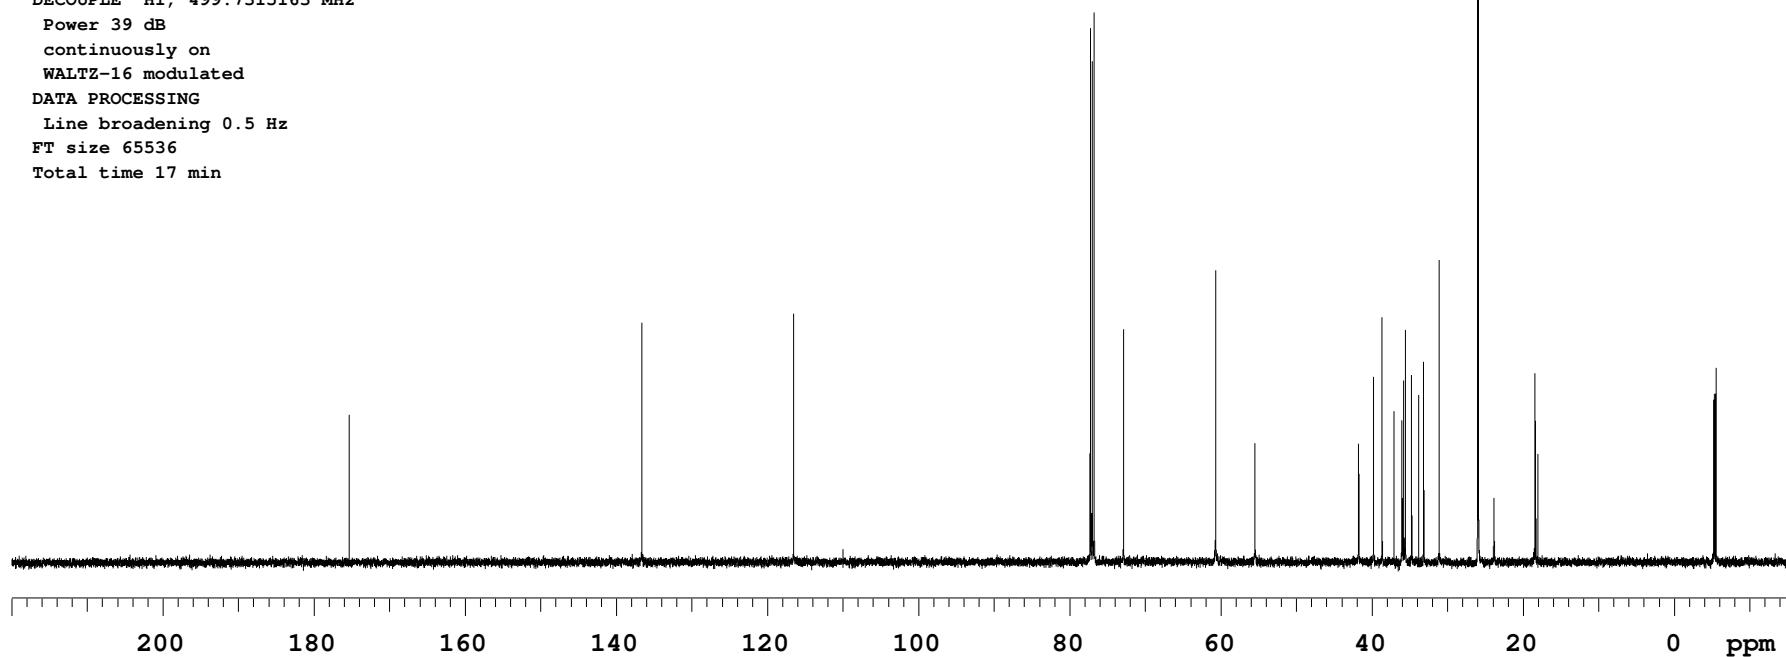

jc-1-254-A

Sample Name:

jc-1-254-A

Data Collected on:

indy.caltech.edu-inova500

Archive directory:

/home/jcha/vnmrsys/data

Sample directory:

jc-1-254-A

FidFile: PROTON02

Pulse Sequence: PROTON (s2pul)

Solvent: cdc13

Data collected on: Apr 17 2011

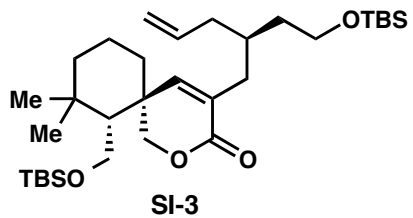

Temp. 25.0 C / 298.1 K  
Sample #15, Operator: jcha  
  
Relax. delay 1.000 sec  
Pulse 45.0 degrees  
Acq. time 2.500 sec  
Width 8000.0 Hz  
64 repetitions  
OBSERVE H1, 499.7290200 MHz  
DATA PROCESSING  
Line broadening 0.2 Hz  
FT size 65536  
Total time 3 min 45 sec

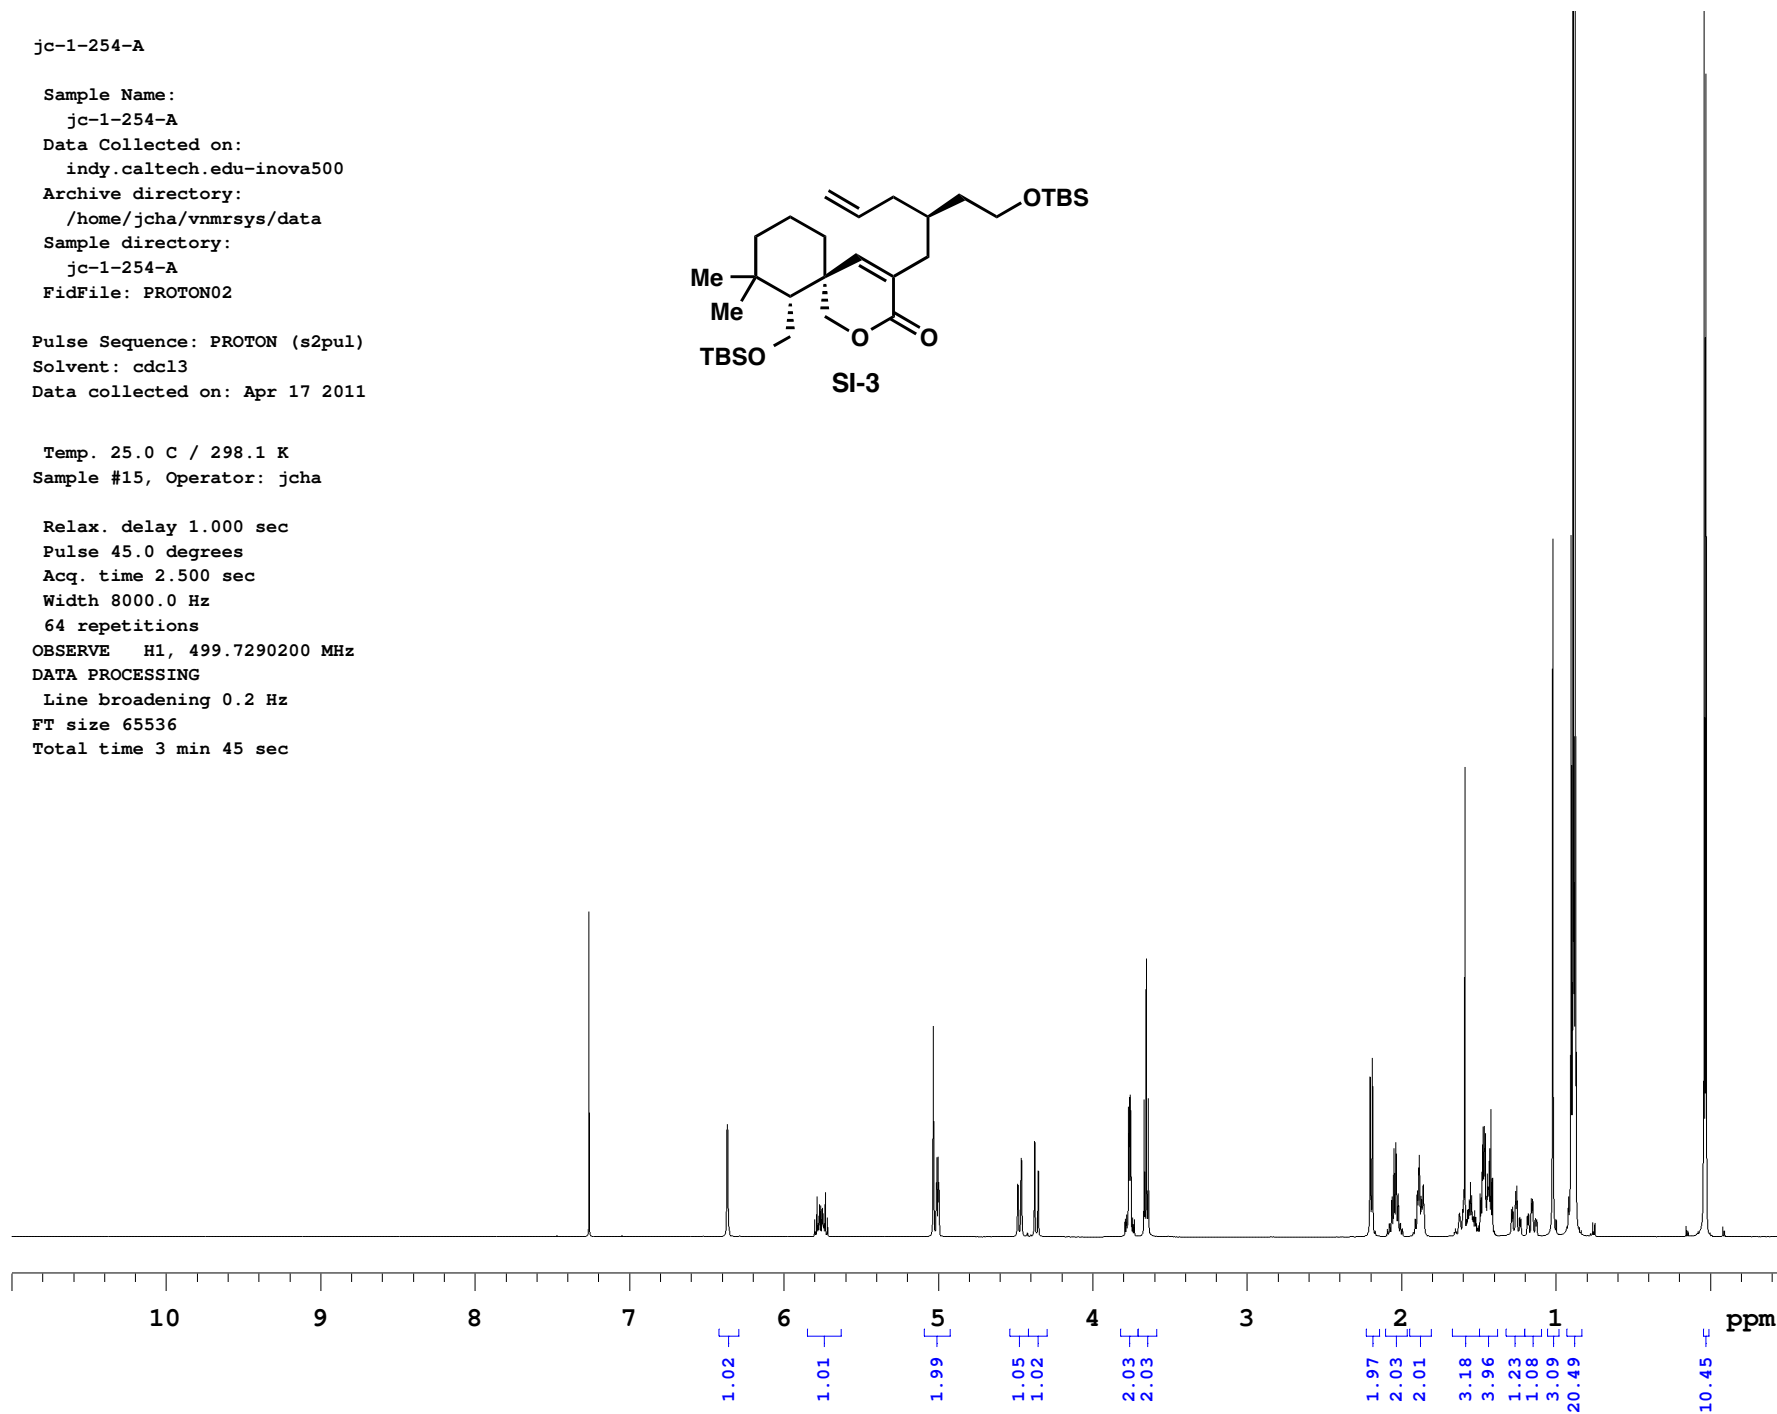

jc-1-254-A

Sample Name:

jc-1-254-A

Data Collected on:

indy.caltech.edu-inova500

Archive directory:

/home/jcha/vnmrsys/data

Sample directory:

jc-1-254-A

FidFile: CARBON02

Pulse Sequence: CARBON (s2pul)

Solvent: cdcl3

Data collected on: Apr 17 2011

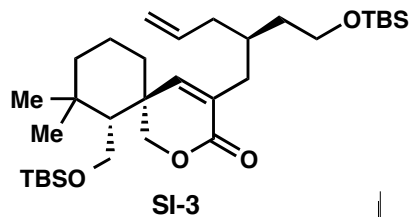

Temp. 25.0 C / 298.1 K

Sample #15, Operator: jcha

Relax. delay 1.000 sec

Pulse 45.0 degrees

Acq. time 1.042 sec

Width 31446.5 Hz

1500 repetitions

OBSERVE C13, 125.6569623 MHz

DECOUPLE H1, 499.7315163 MHz

Power 39 dB

continuously on

WALTZ-16 modulated

DATA PROCESSING

Line broadening 0.5 Hz

FT size 65536

Total time 51 min

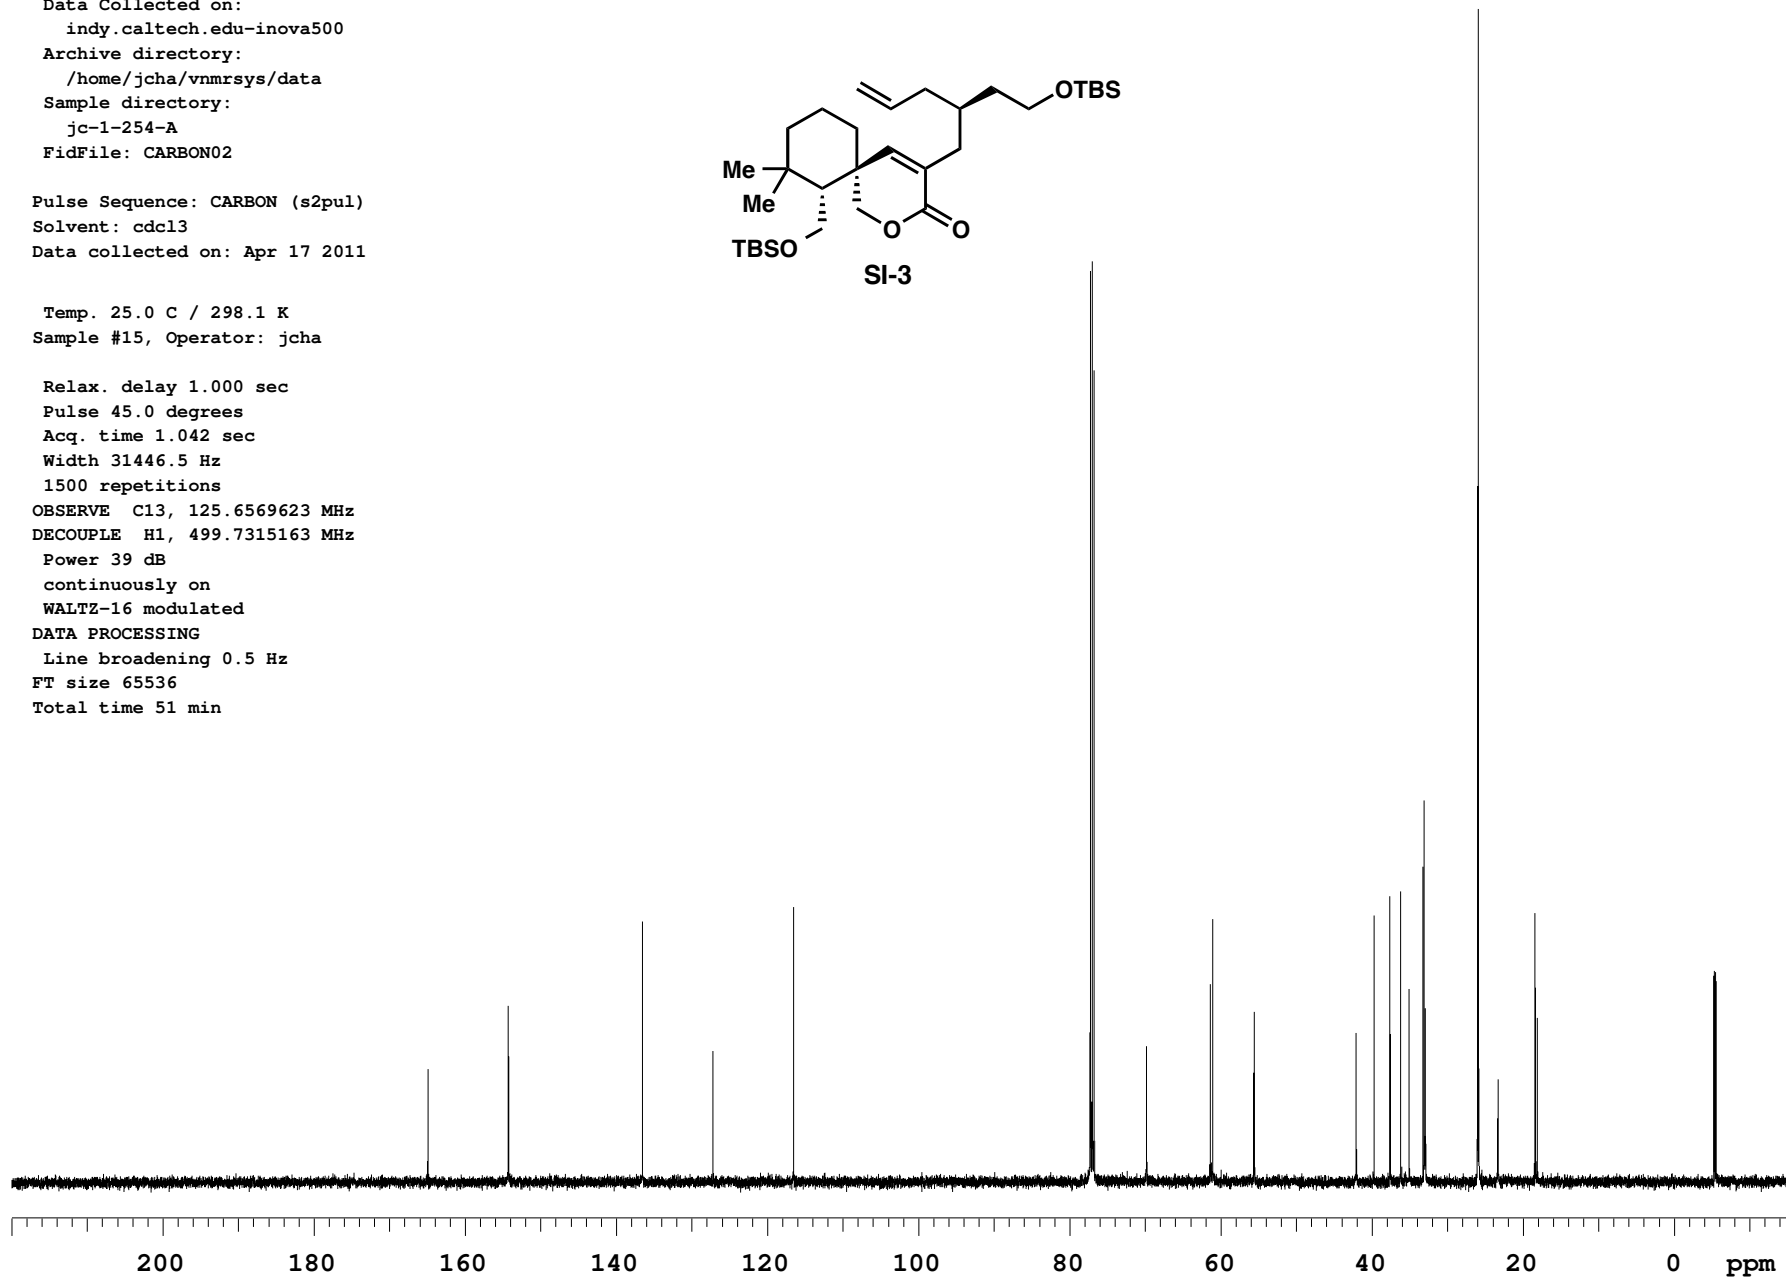

jc-1-256-A

Sample Name:

jc-1-256-A

Data Collected on:

indy.caltech.edu-inova500

Archive directory:

/home/jcha/vnmrsys/data

Sample directory:

jc-1-256-A

FidFile: PROTON01

Pulse Sequence: PROTON (s2pul)

Solvent: cdc13

Data collected on: Apr 19 2011

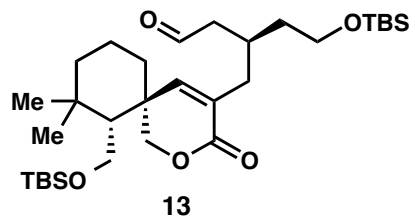

Temp. 25.0 C / 298.1 K

Sample #46, Operator: jcha

Relax. delay 1.000 sec

Pulse 45.0 degrees

Acq. time 2.500 sec

Width 8000.0 Hz

64 repetitions

OBSERVE H1, 499.7290208 MHz

DATA PROCESSING

Line broadening 0.2 Hz

FT size 65536

Total time 3 min 45 sec

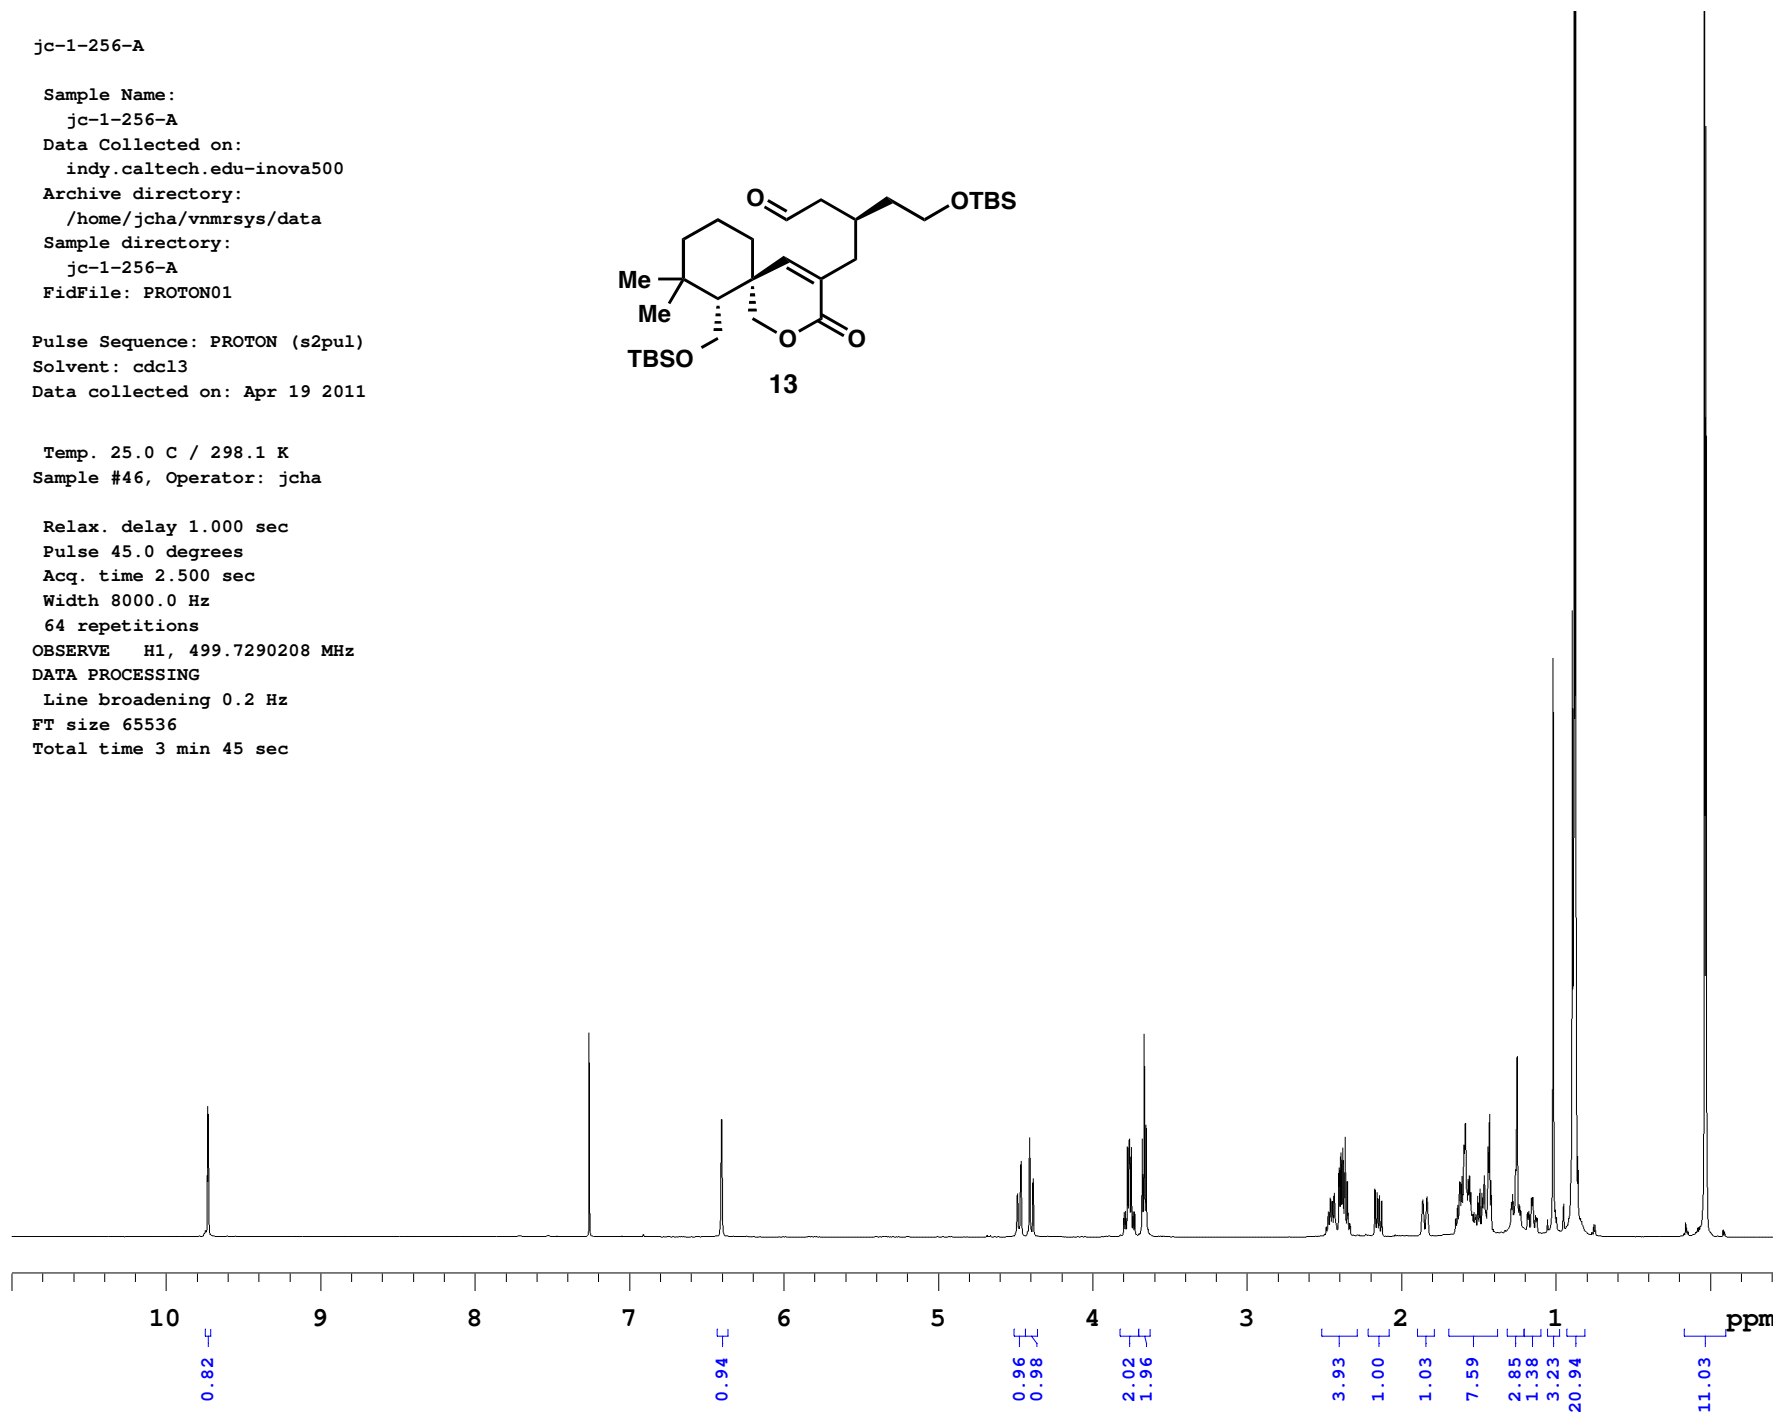



jc-1-256-A

Sample Name:

jc-1-256-A

Data Collected on:

indy.caltech.edu-inova500

Archive directory:

/home/jcha/vnmrsys/data

Sample directory:

jc-1-256-A

FidFile: CARBON01

Pulse Sequence: CARBON (s2pul)

Solvent: cdc13

Data collected on: Apr 19 2011

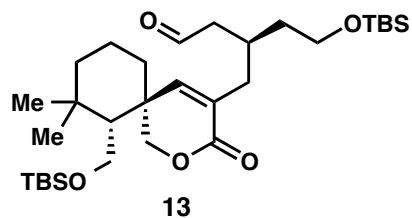

Temp. 25.0 C / 298.1 K

Sample #46, Operator: jcha

Relax. delay 1.000 sec

Pulse 45.0 degrees

Acq. time 1.042 sec

Width 31446.5 Hz

1500 repetitions

OBSERVE C13, 125.6569623 MHz

DECOUPLE H1, 499.7315163 MHz

Power 39 dB

continuously on

WALTZ-16 modulated

DATA PROCESSING

Line broadening 0.5 Hz

FT size 65536

Total time 51 min

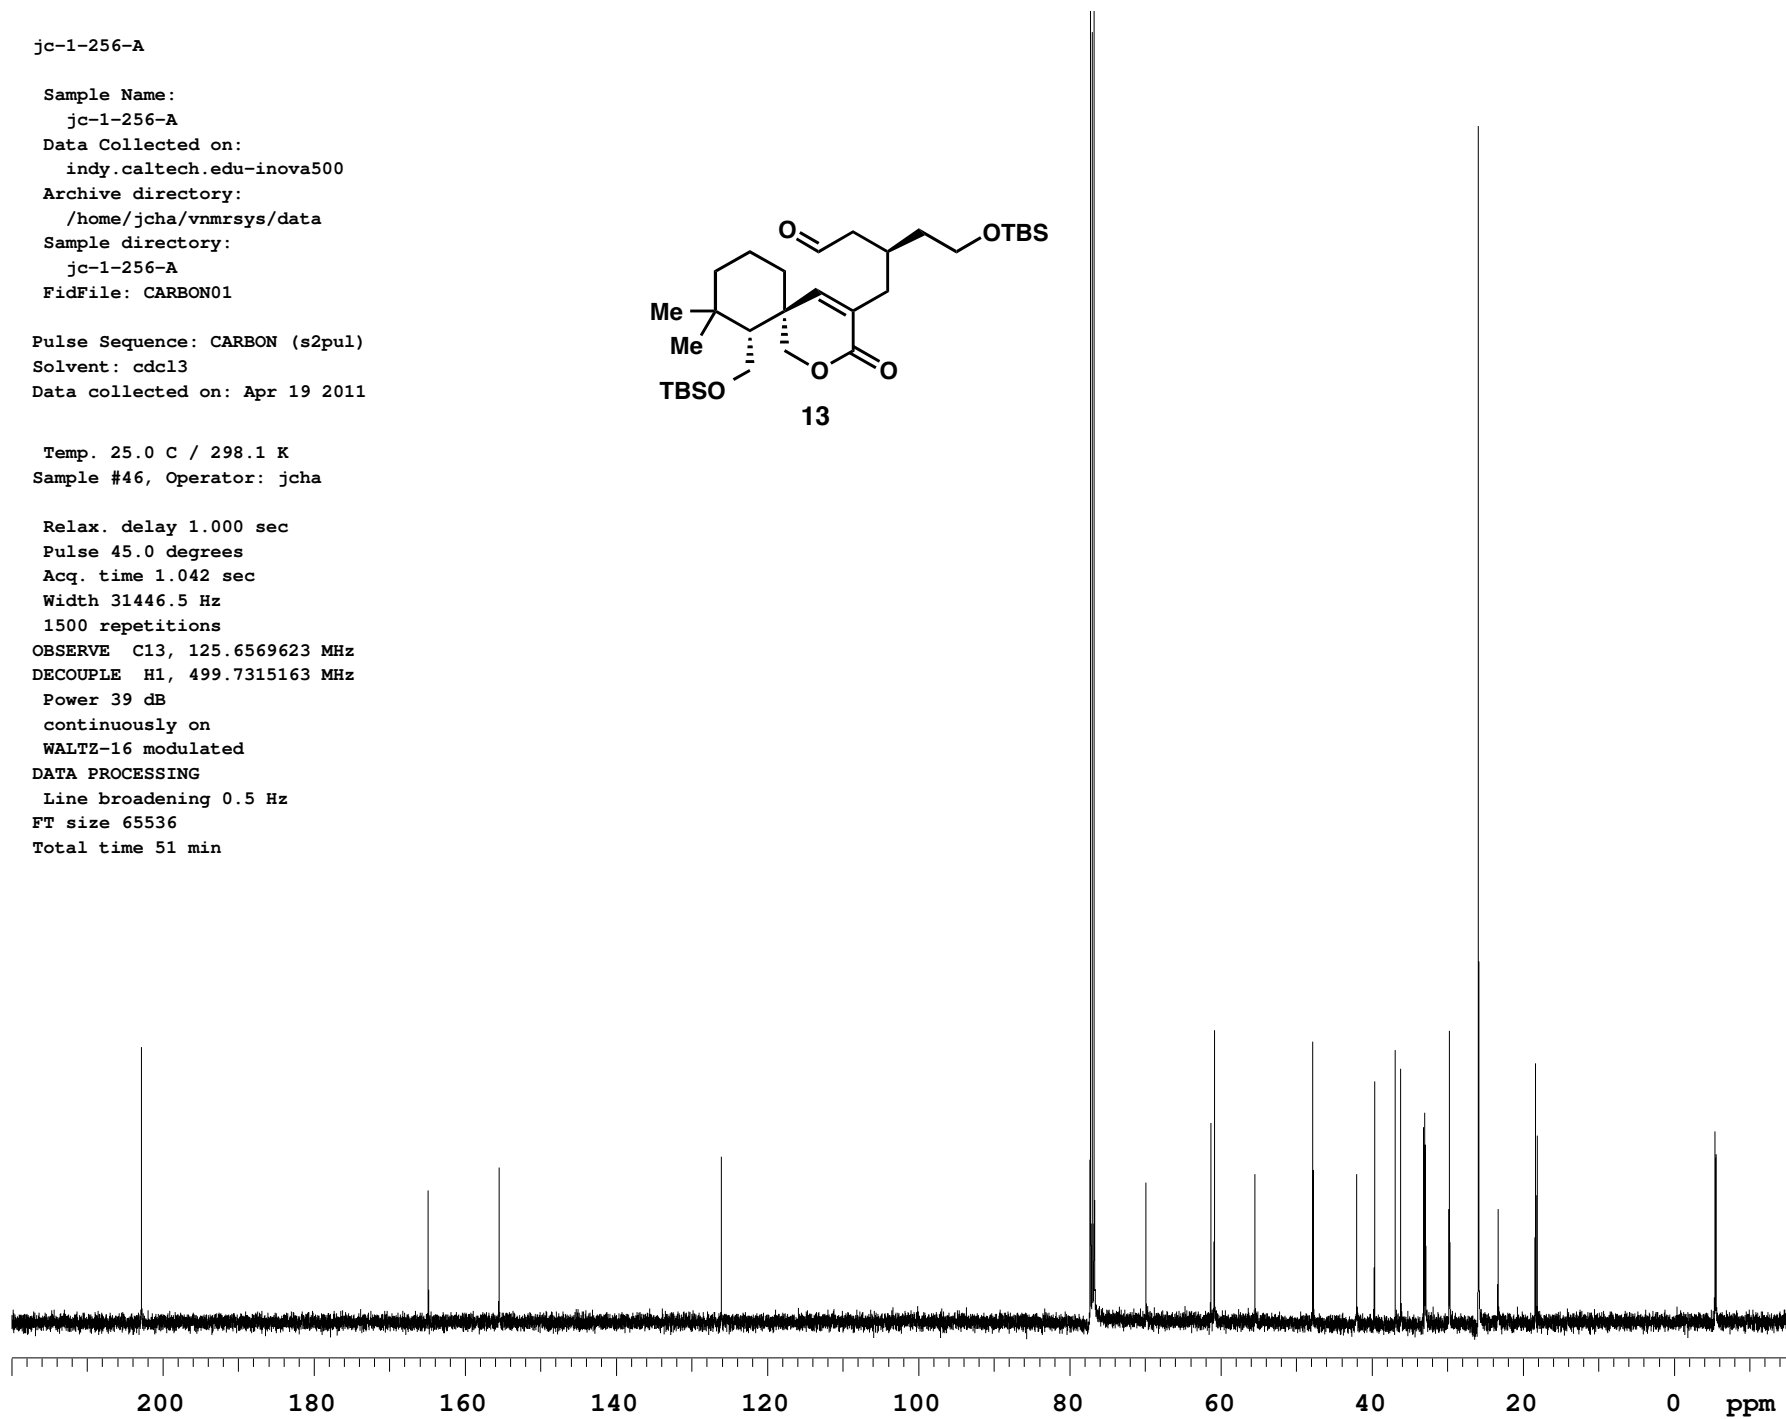

jc-1-257-A

Sample Name:

jc-1-257-A

Data Collected on:

indy.caltech.edu-inova500

Archive directory:

/home/jcha/vnmrsys/data

Sample directory:

jc-1-257-A

FidFile: PROTON04

Pulse Sequence: PROTON (s2pul)

Solvent: cdc13

Data collected on: Jul 10 2011

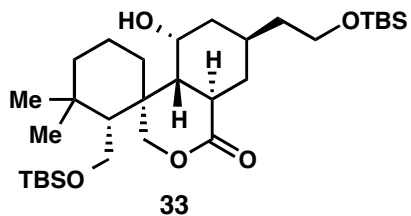

Sample #2, Operator: jcha

Relax. delay 1.000 sec

Pulse 45.0 degrees

Acq. time 2.500 sec

Width 8000.0 Hz

16 repetitions

OBSERVE H1, 499.7290205 MHz

DATA PROCESSING

Line broadening 0.2 Hz

FT size 65536

Total time 0 min 56 sec

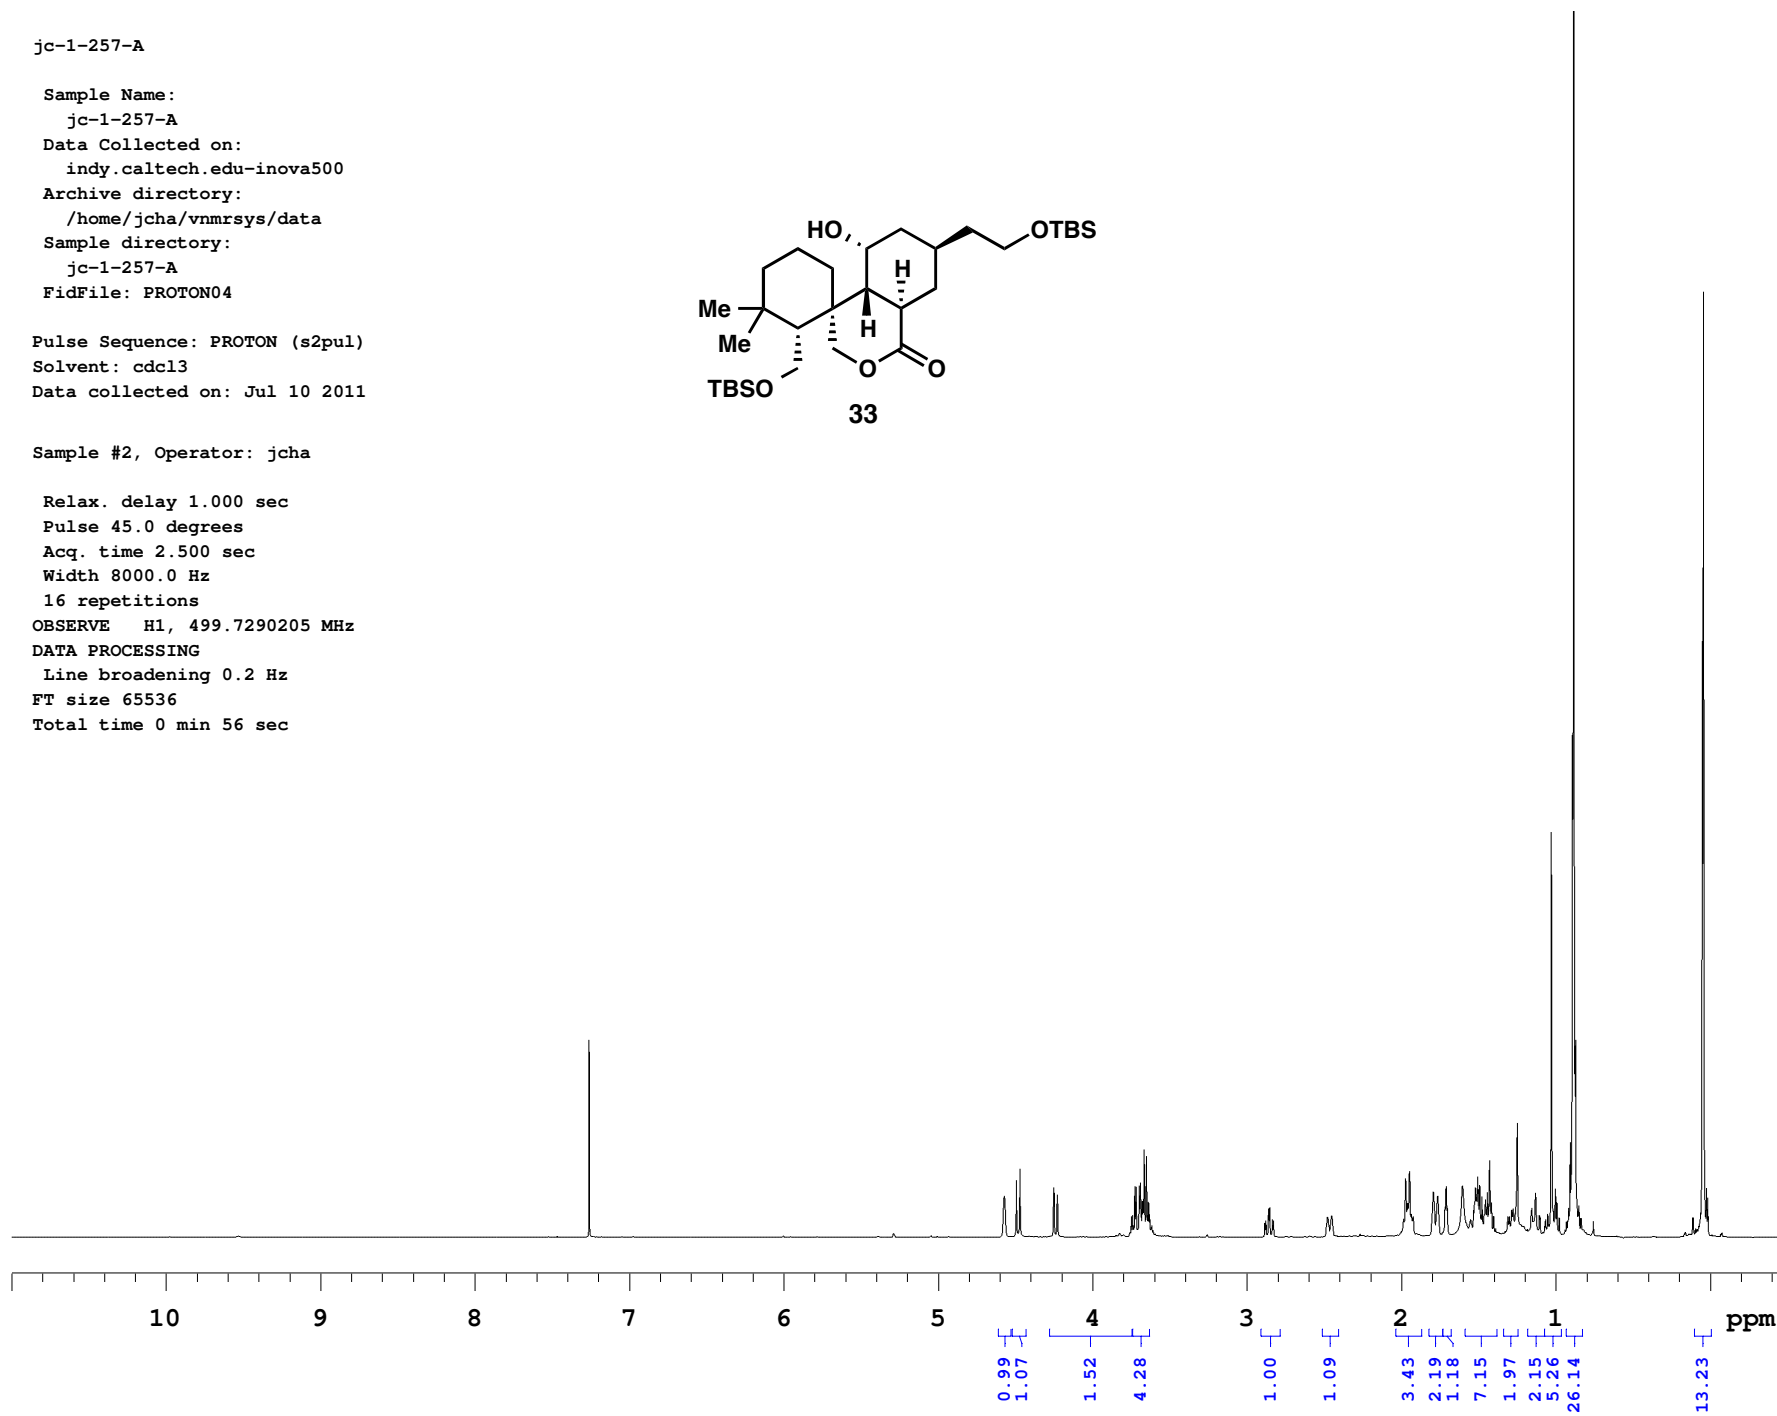

jc-1-257-A

Sample Name:

jc-1-257-A

Data Collected on:

indy.caltech.edu-inova500

Archive directory:

/home/jcha/vnmrsys/data

Sample directory:

jc-1-257-A

FidFile: CARBON01

Pulse Sequence: CARBON (s2pul)

Solvent: cdc13

Data collected on: Jul 10 2011

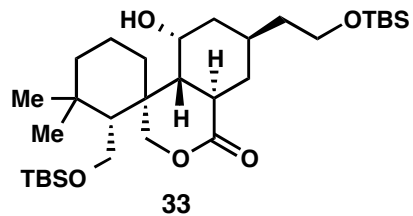

Sample #2, Operator: jcha

Relax. delay 1.000 sec

Pulse 45.0 degrees

Acq. time 1.042 sec

Width 31446.5 Hz

1250 repetitions

OBSERVE C13, 125.6569623 MHz

DECOUPLE H1, 499.7315163 MHz

Power 39 dB

continuously on

WALTZ-16 modulated

DATA PROCESSING

Line broadening 0.5 Hz

FT size 65536

Total time 42 min

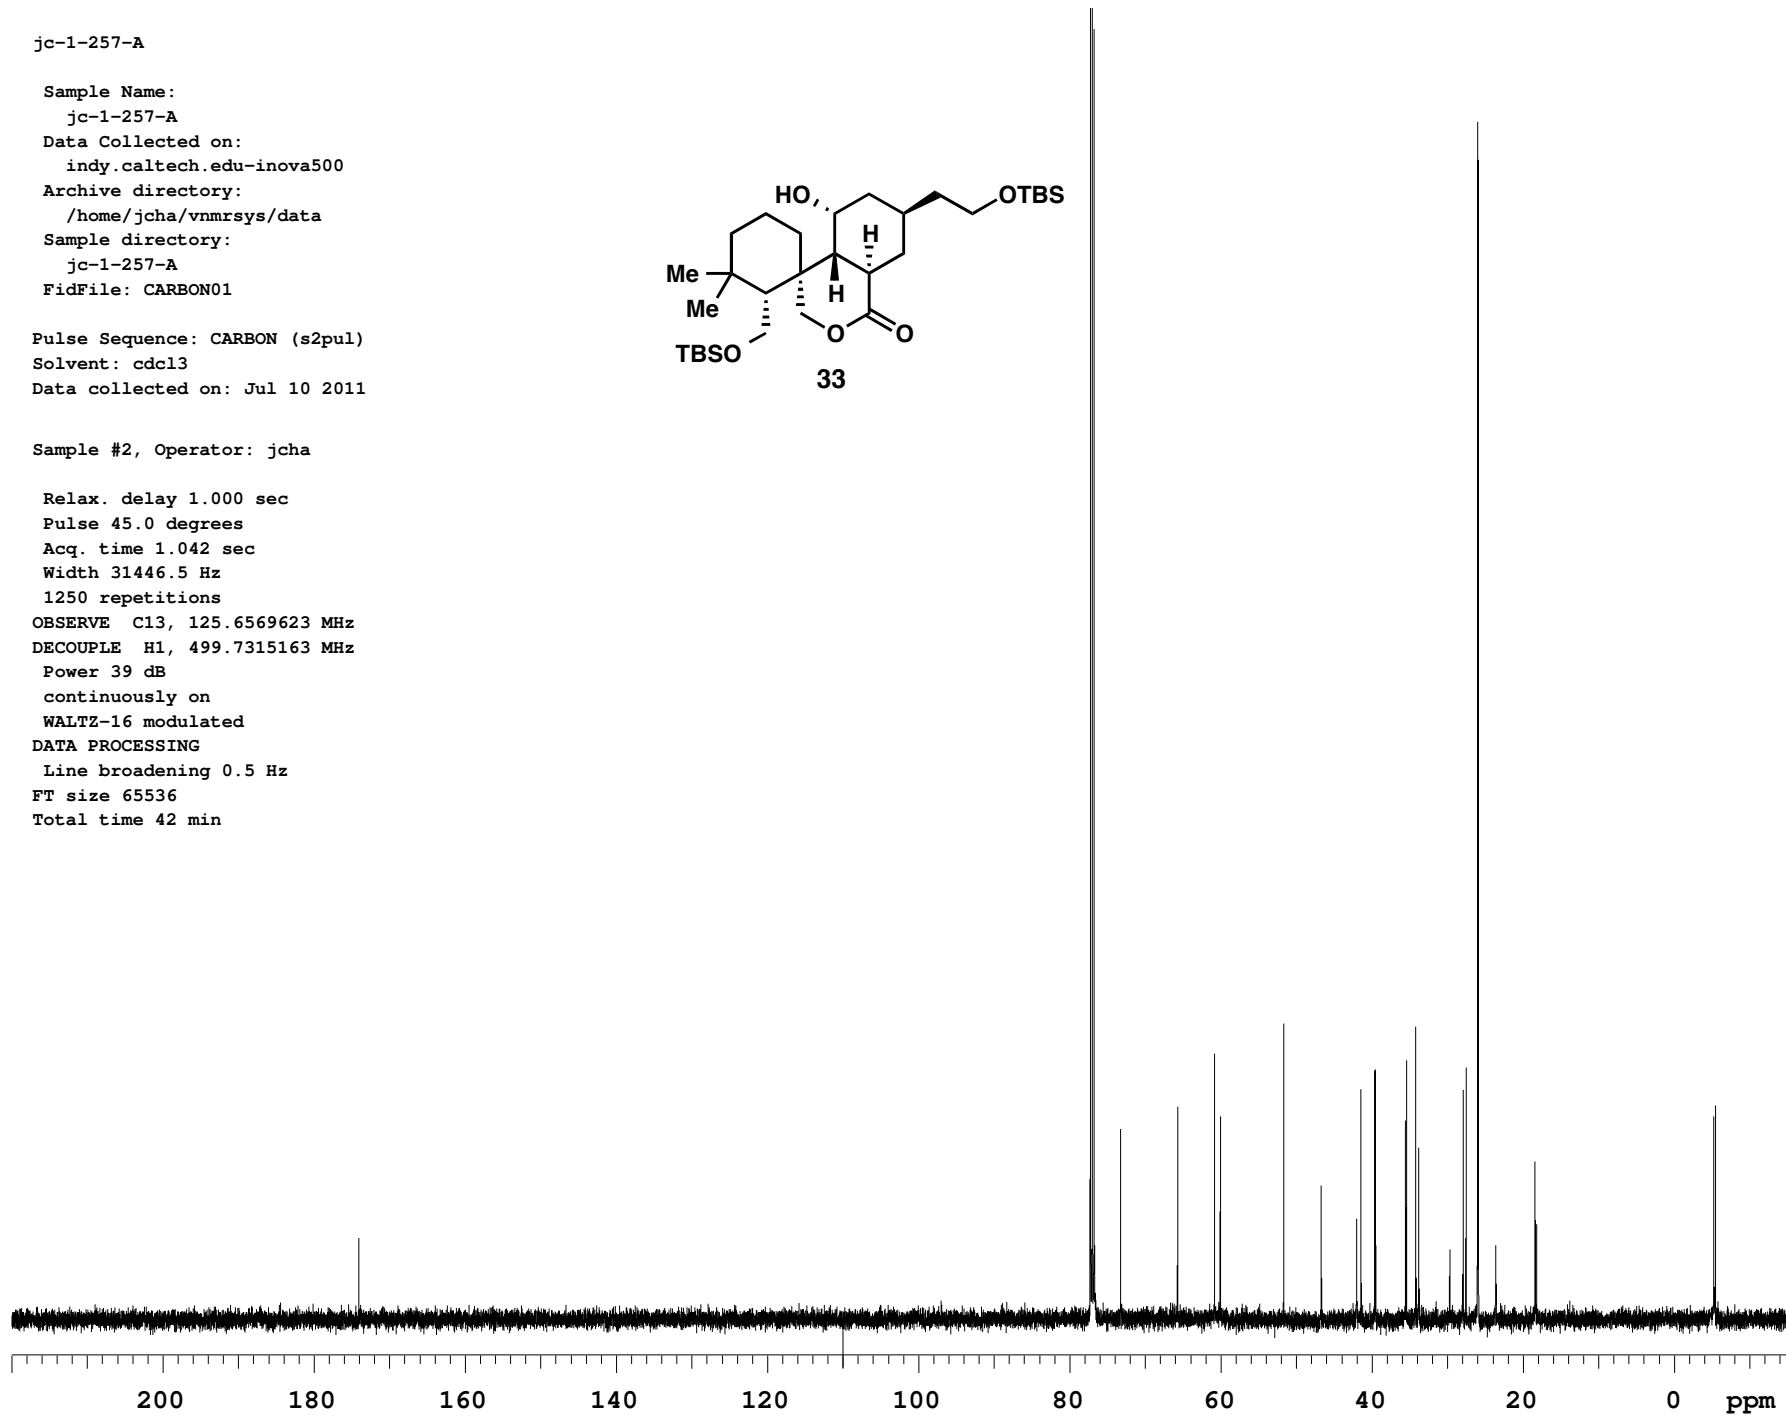

jc-1-258-A

Sample Name:

jc-1-258-A

Data Collected on:

indy.caltech.edu-inova500

Archive directory:

/home/jcha/vnmrsys/data

Sample directory:

jc-1-258-A

FidFile: PROTON01

Pulse Sequence: PROTON (s2pul)

Solvent: cdc13

Data collected on: May 3 2011

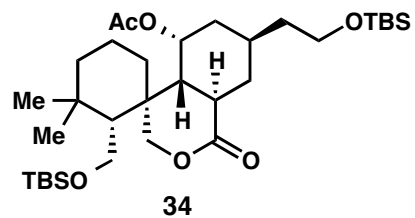

Temp. 25.0 C / 298.1 K

Sample #7, Operator: jcha

Relax. delay 1.000 sec

Pulse 45.0 degrees

Acq. time 2.500 sec

Width 8000.0 Hz

128 repetitions

OBSERVE H1, 499.7290203 MHz

DATA PROCESSING

Line broadening 0.2 Hz

FT size 65536

Total time 7 min 29 sec

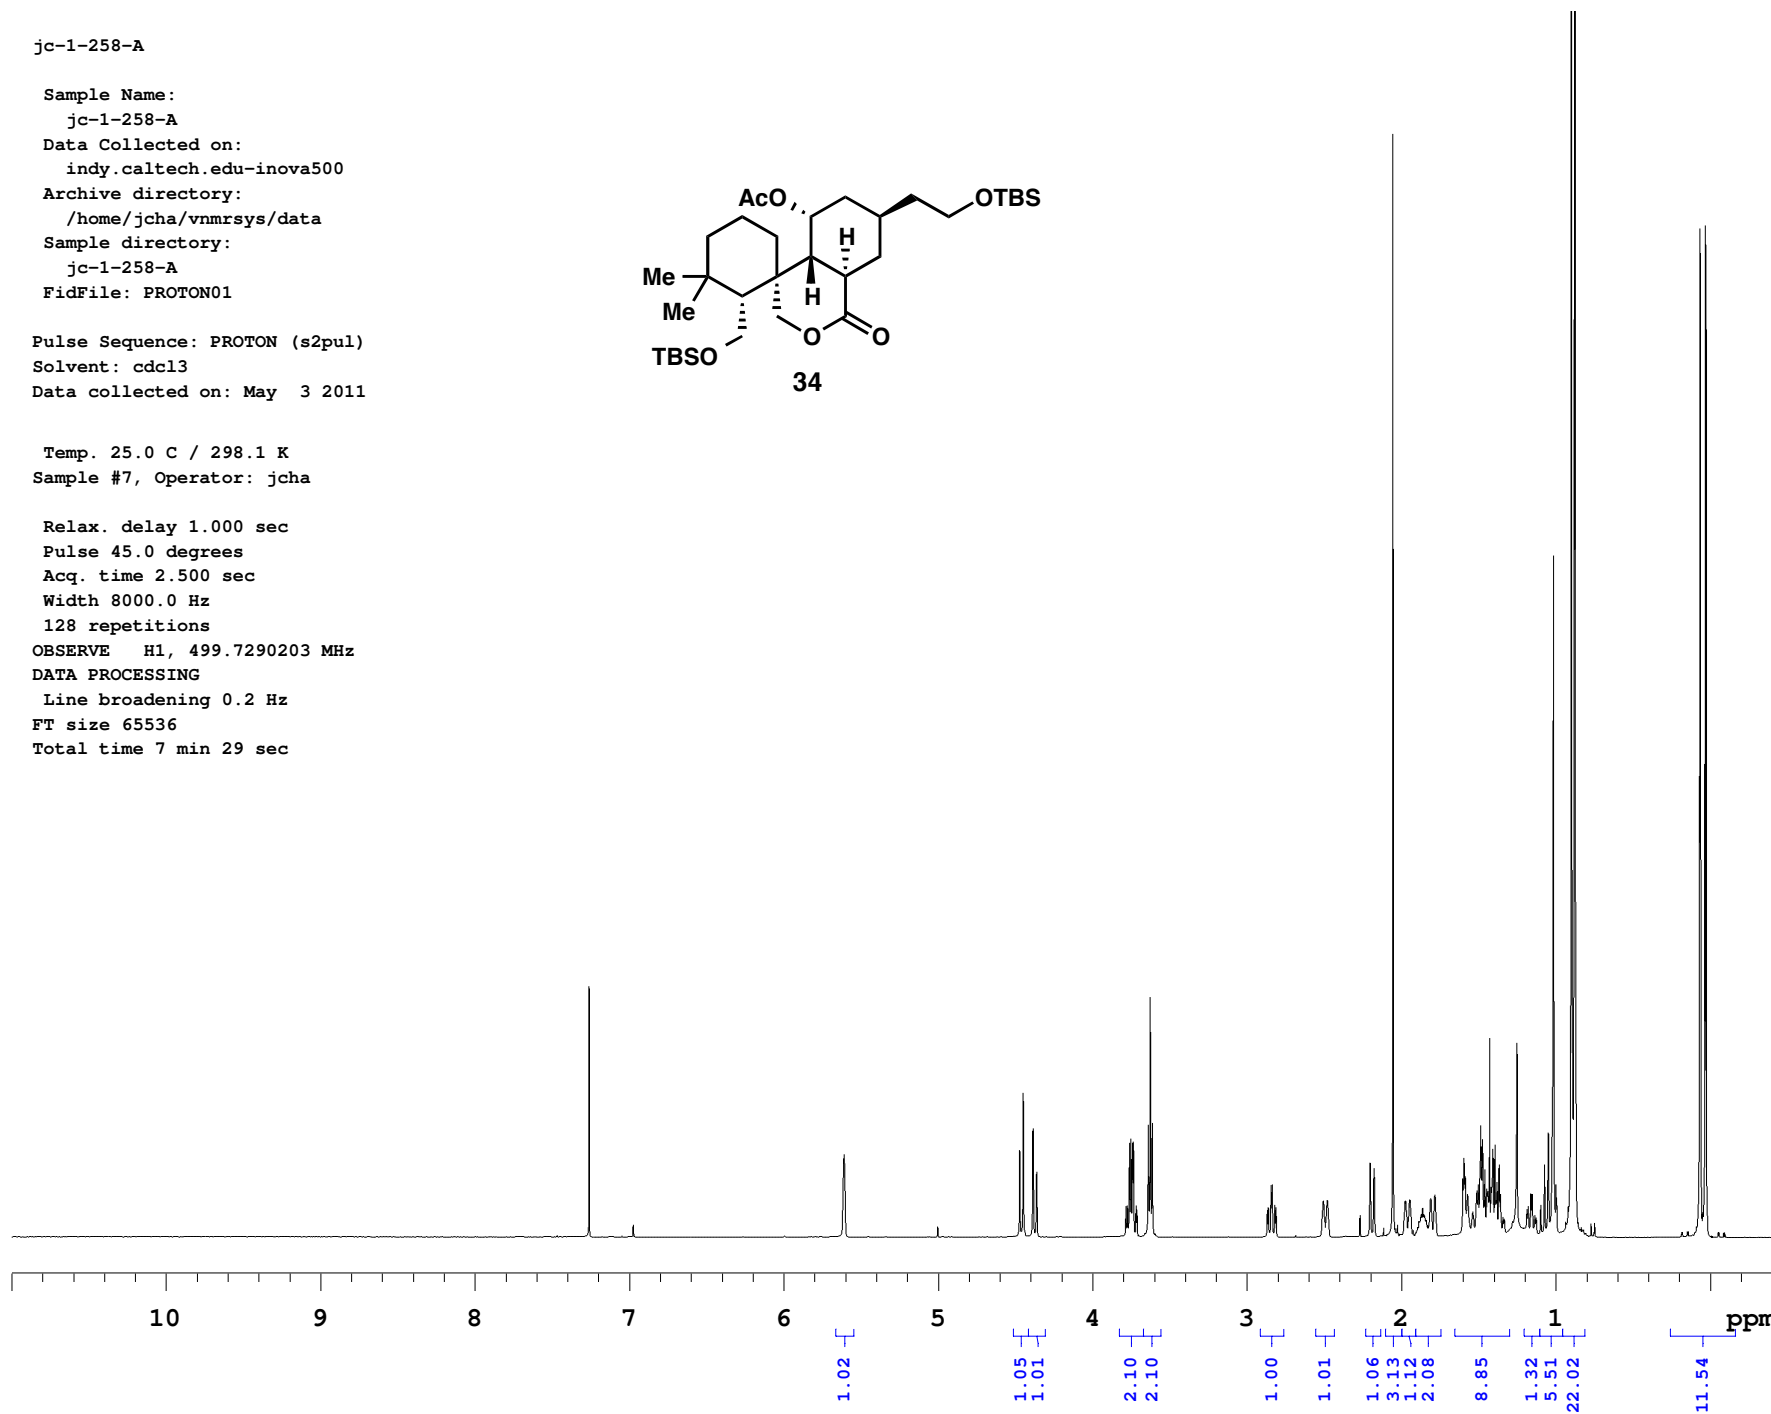

jc-1-258-A

Sample Name:

jc-1-258-A

Data Collected on:

indy.caltech.edu-inova500

Archive directory:

/home/jcha/vnmrsys/data

Sample directory:

jc-1-258-A

FidFile: CARBON01

Pulse Sequence: CARBON (s2pul)

Solvent: cdc13

Data collected on: May 3 2011

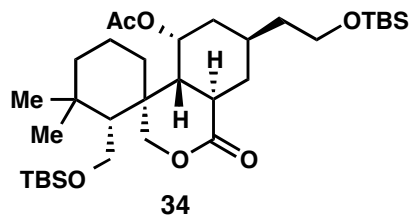

Temp. 25.0 C / 298.1 K

Sample #7, Operator: jcha

Relax. delay 1.000 sec

Pulse 45.0 degrees

Acq. time 1.042 sec

Width 31446.5 Hz

1000 repetitions

OBSERVE C13, 125.6569623 MHz

DECOUPLE H1, 499.7315163 MHz

Power 39 dB

continuously on

WALTZ-16 modulated

DATA PROCESSING

Line broadening 0.5 Hz

FT size 65536

Total time 34 min

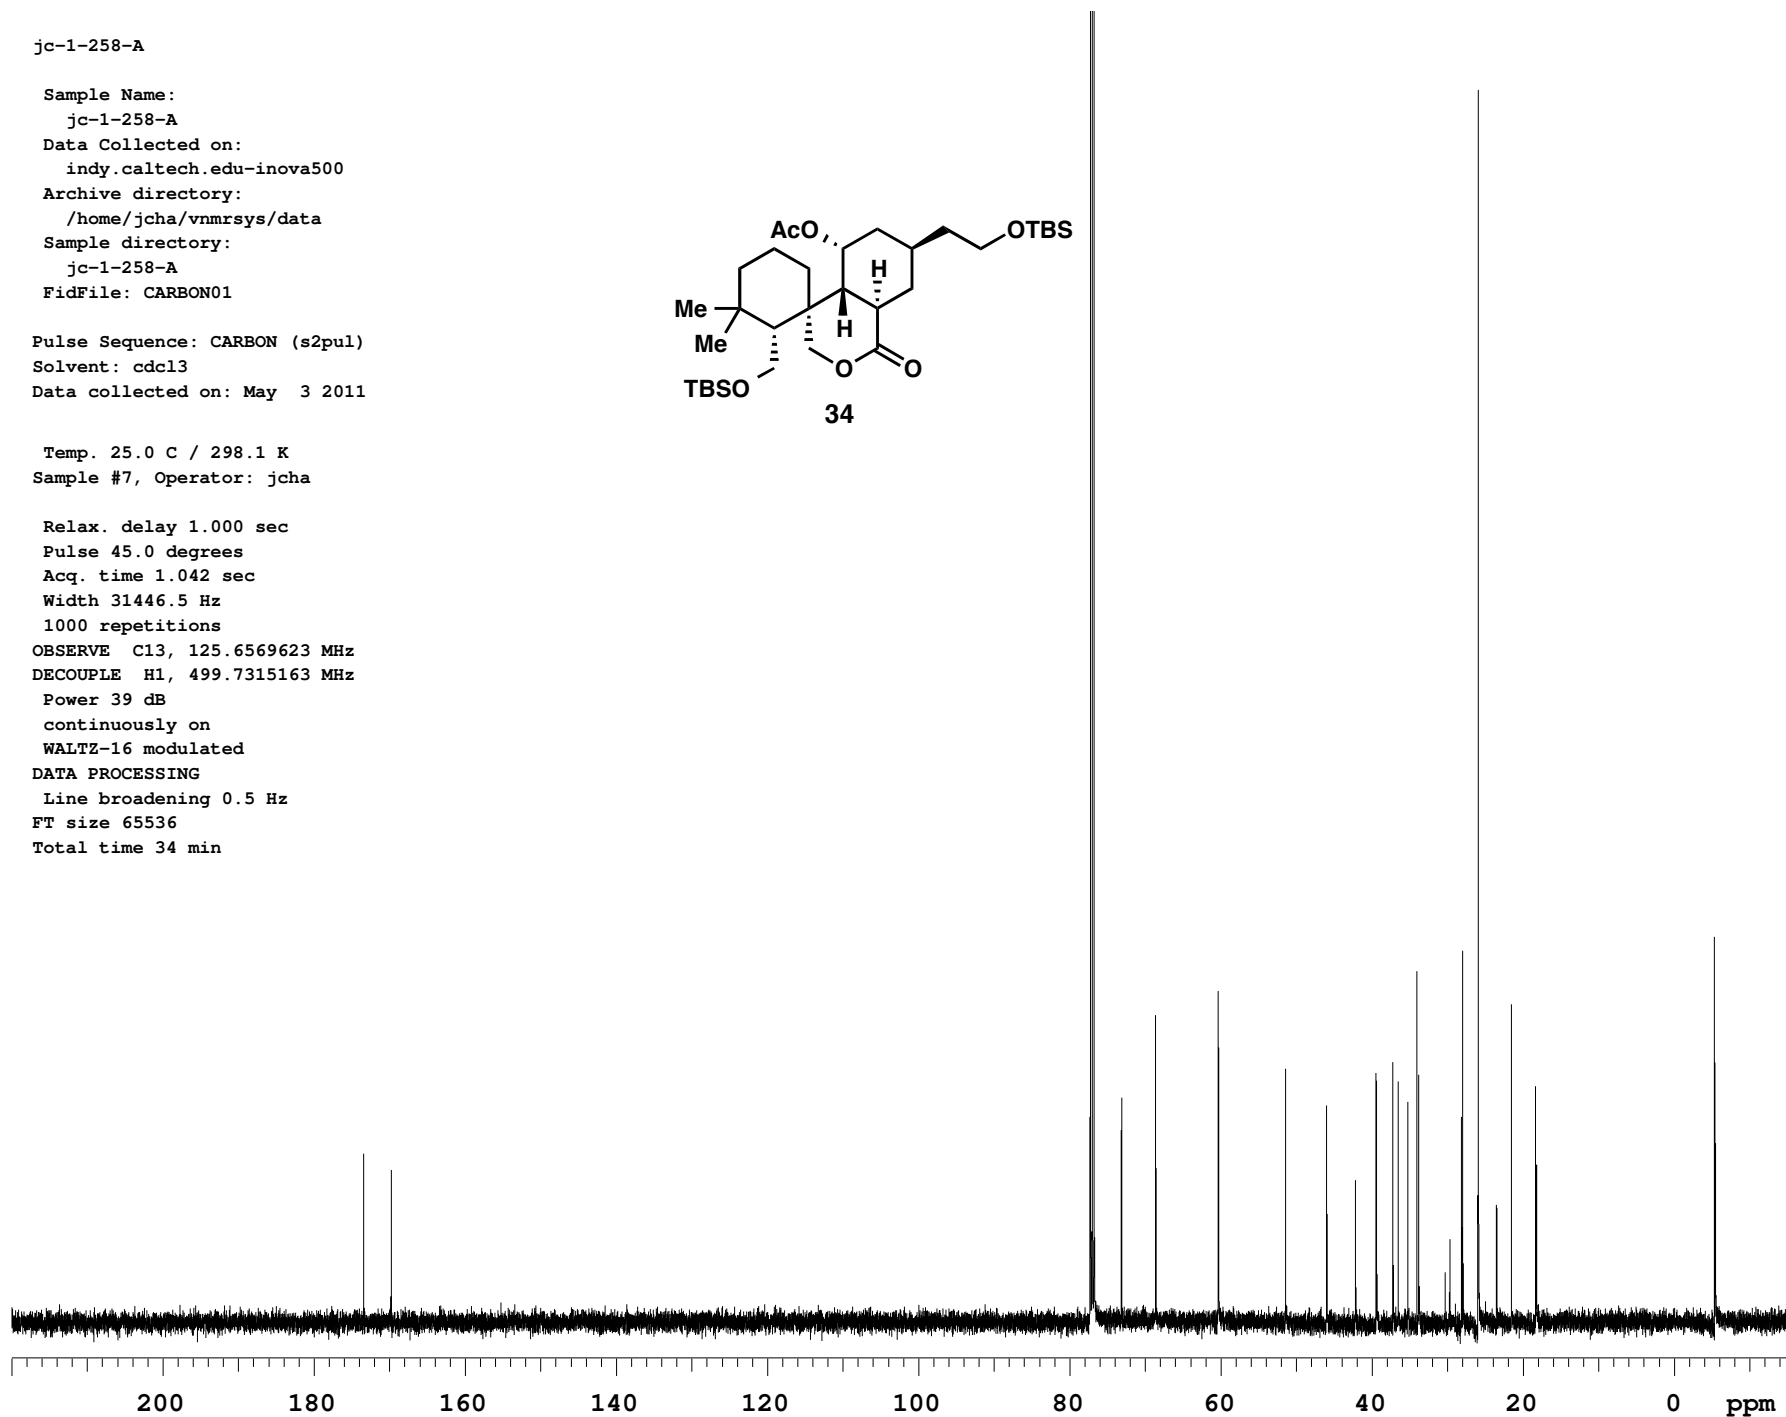

COSY of

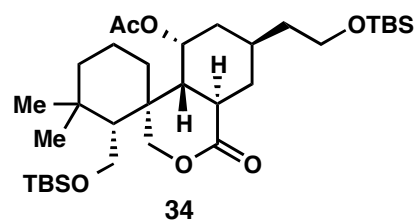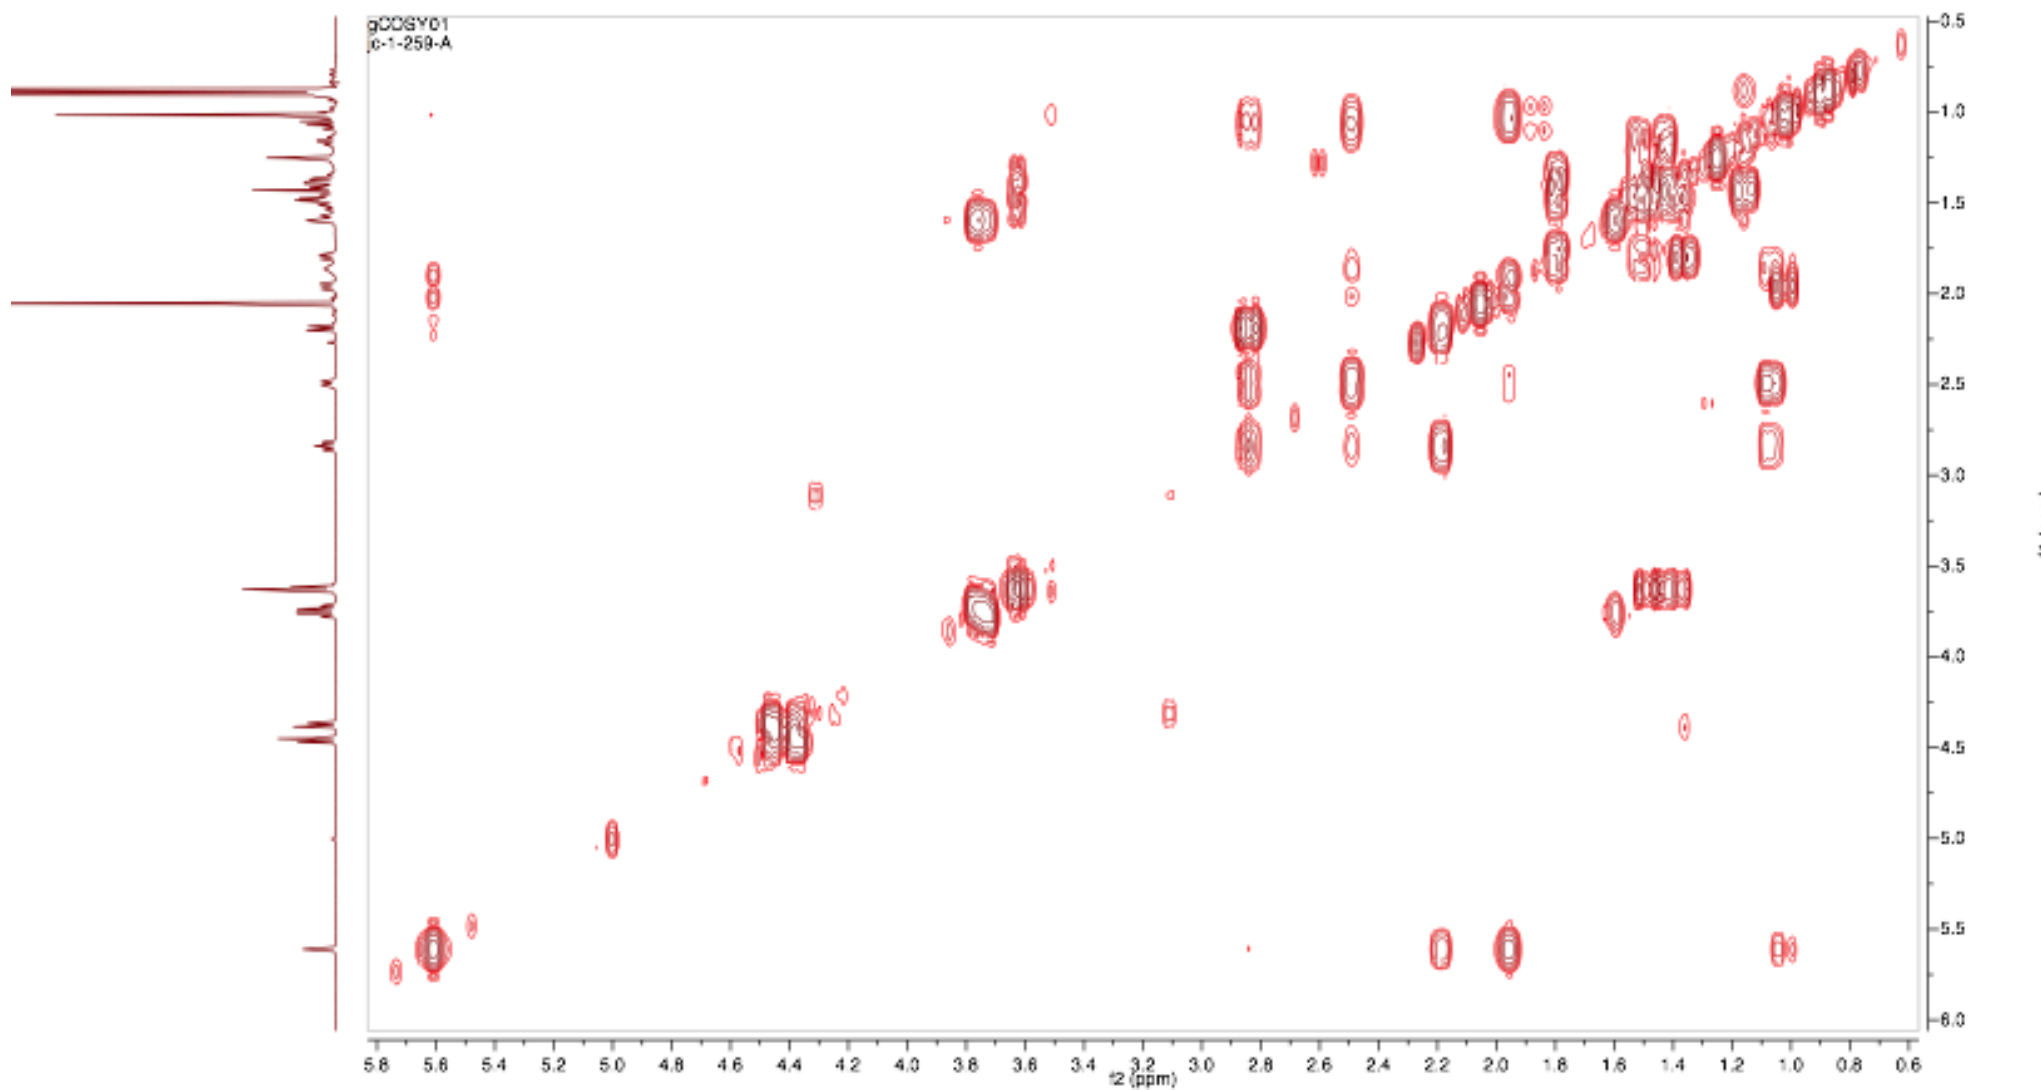

HSQC of

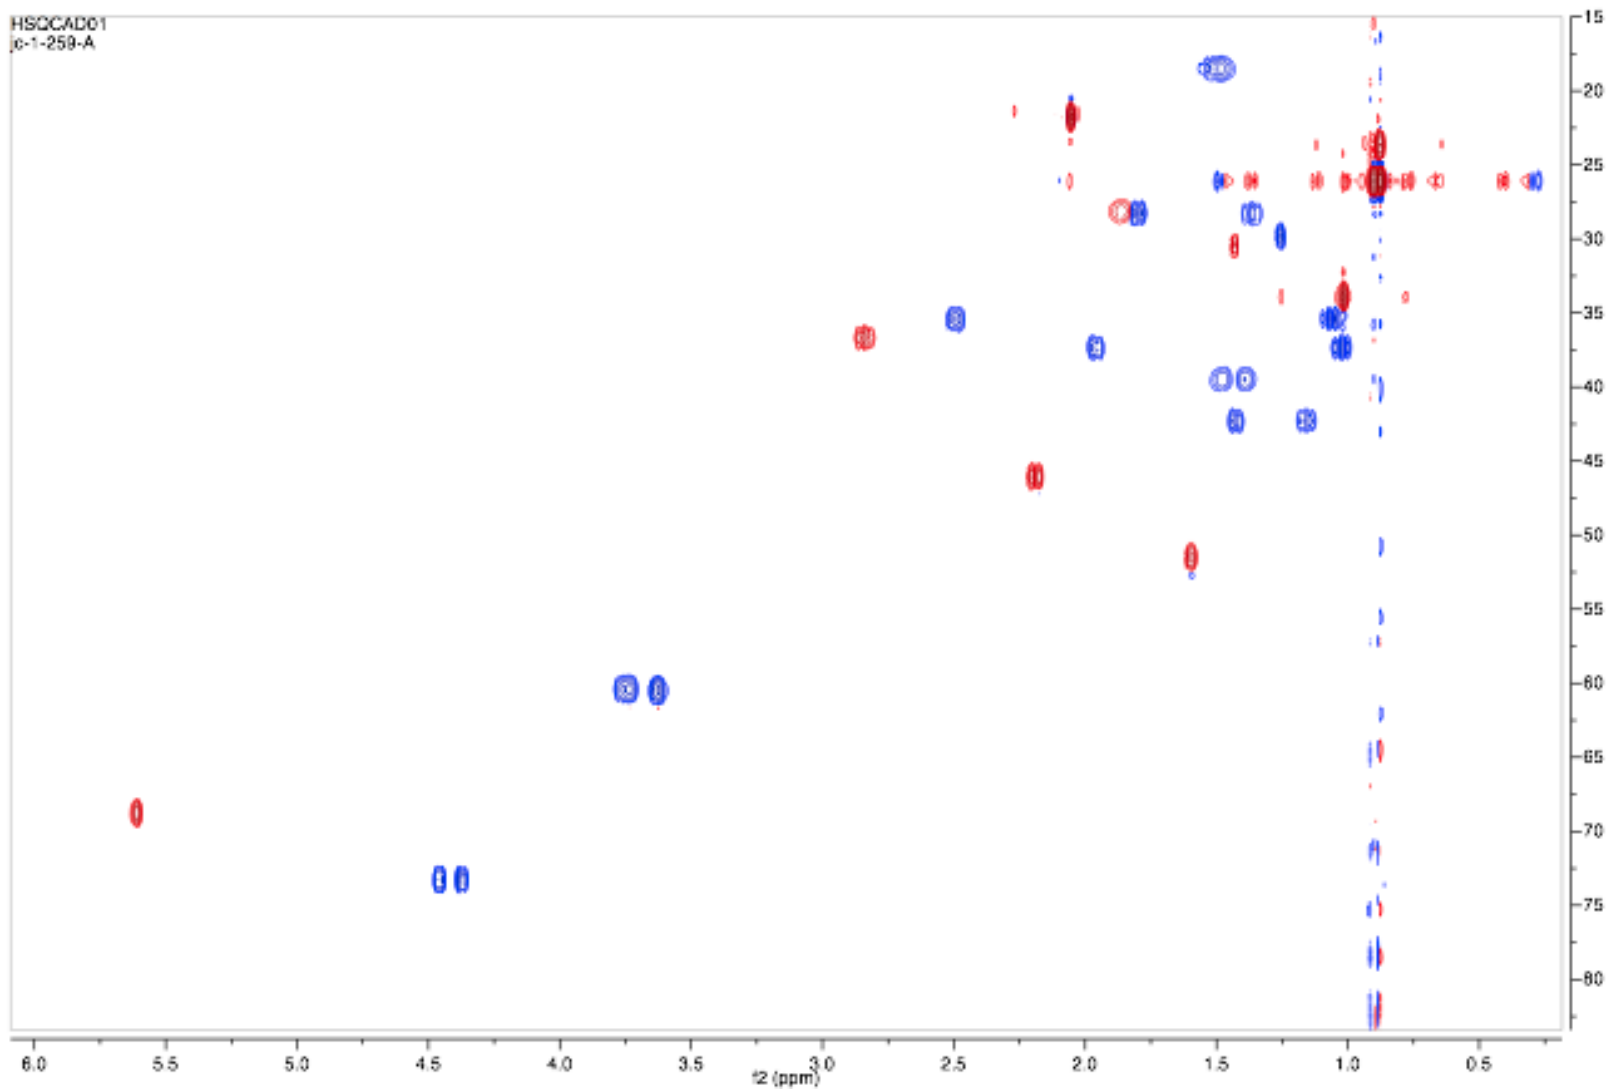

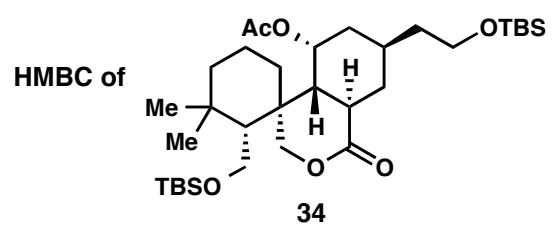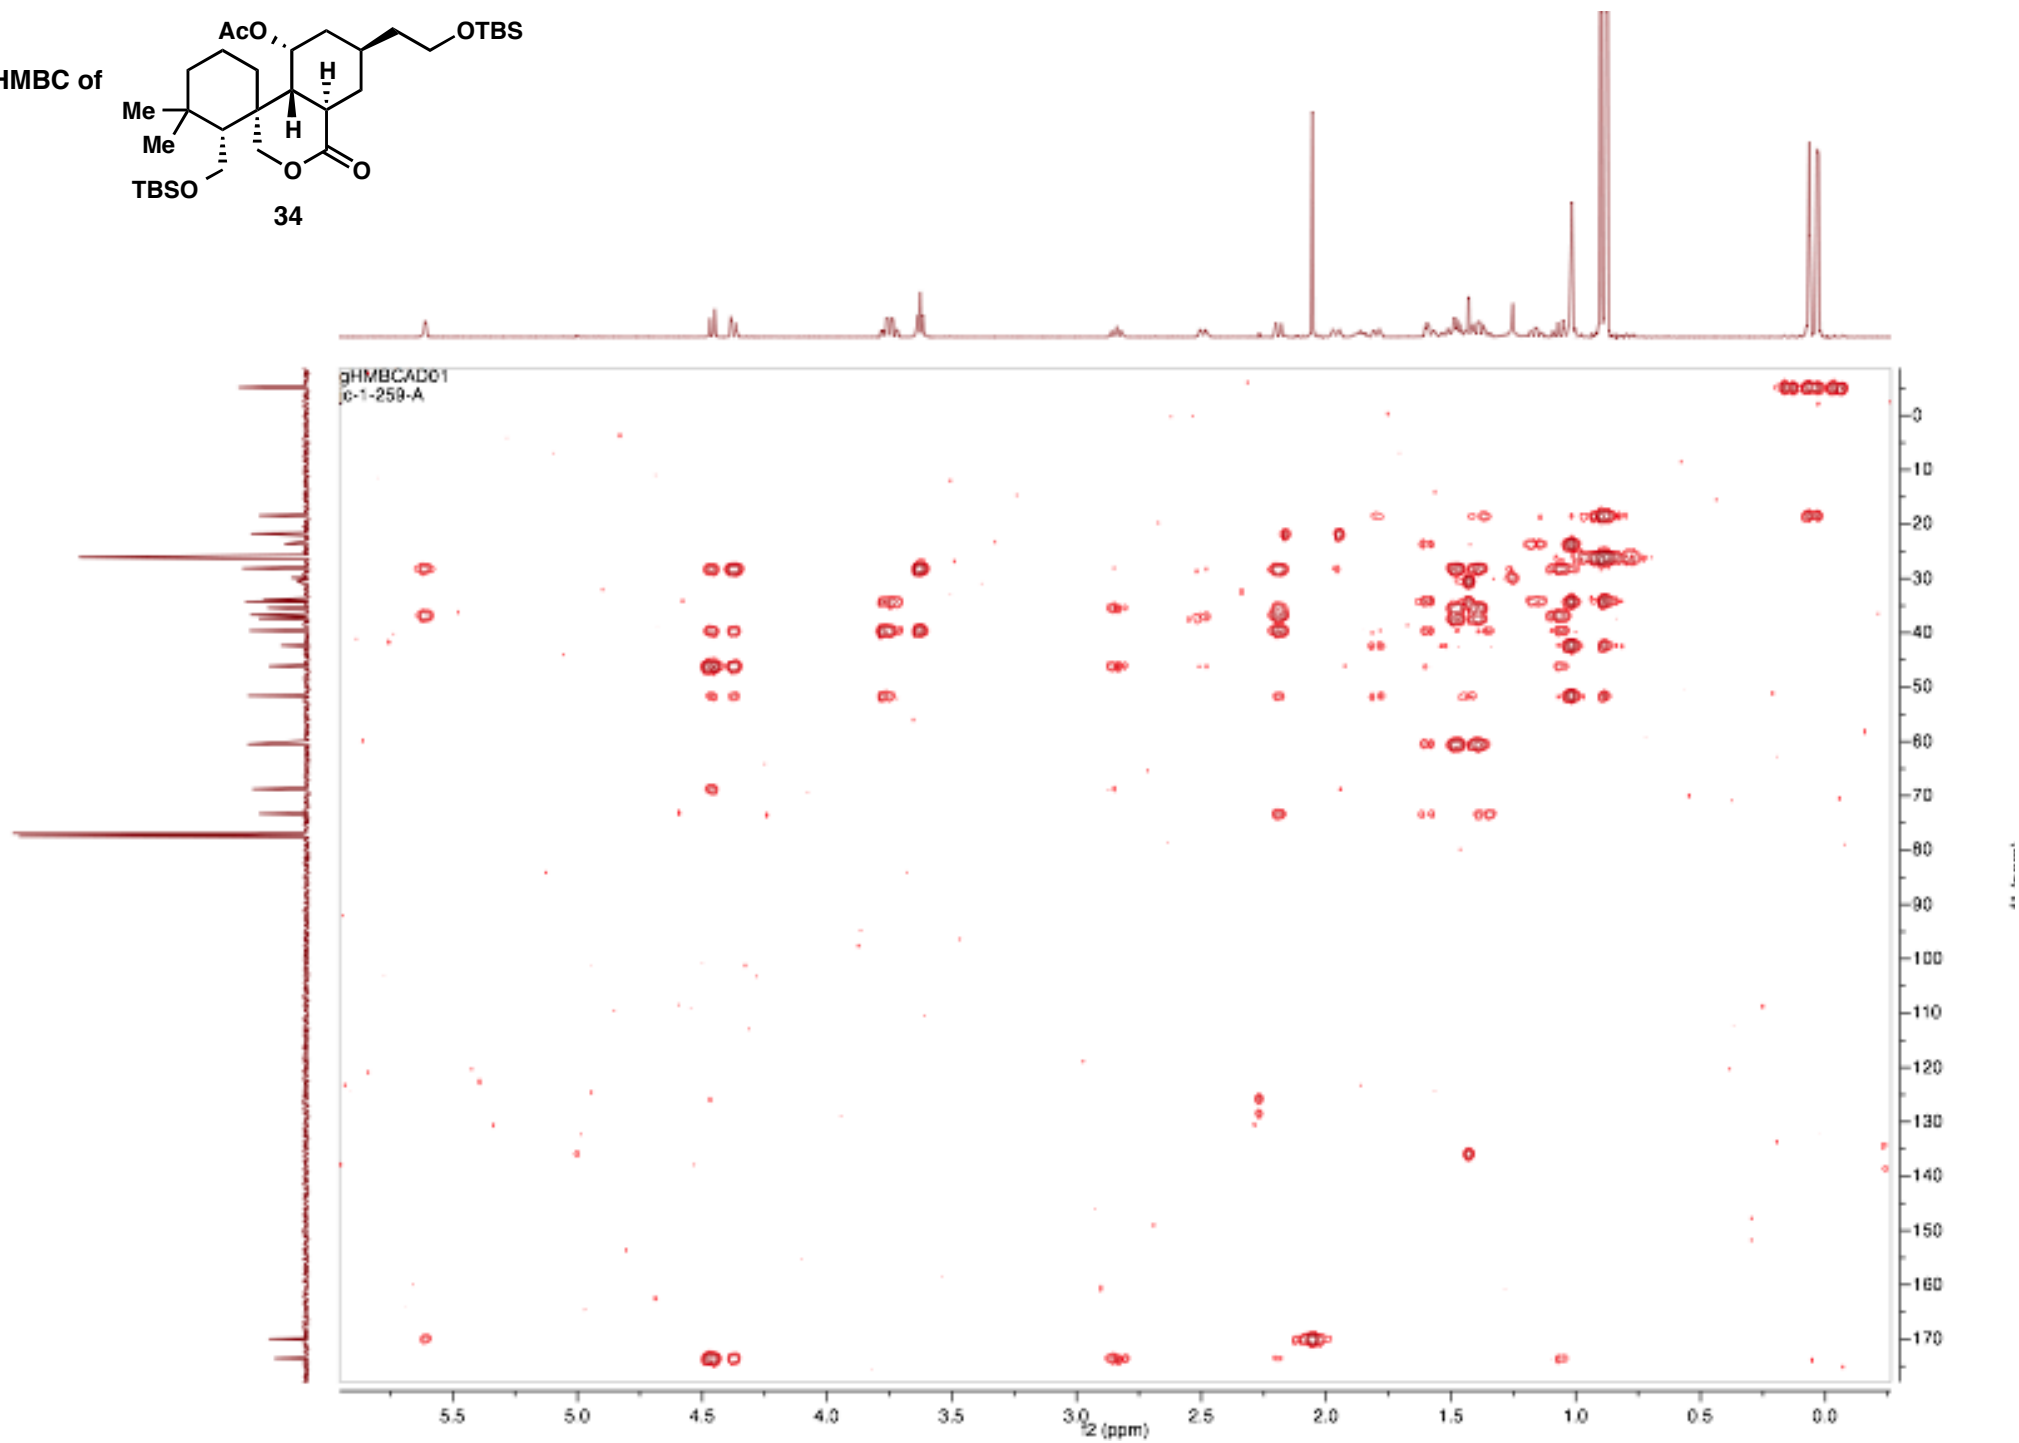



NOESY of

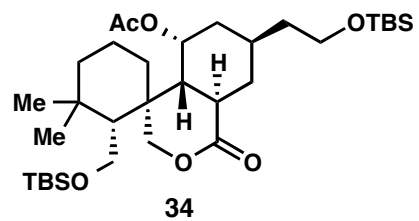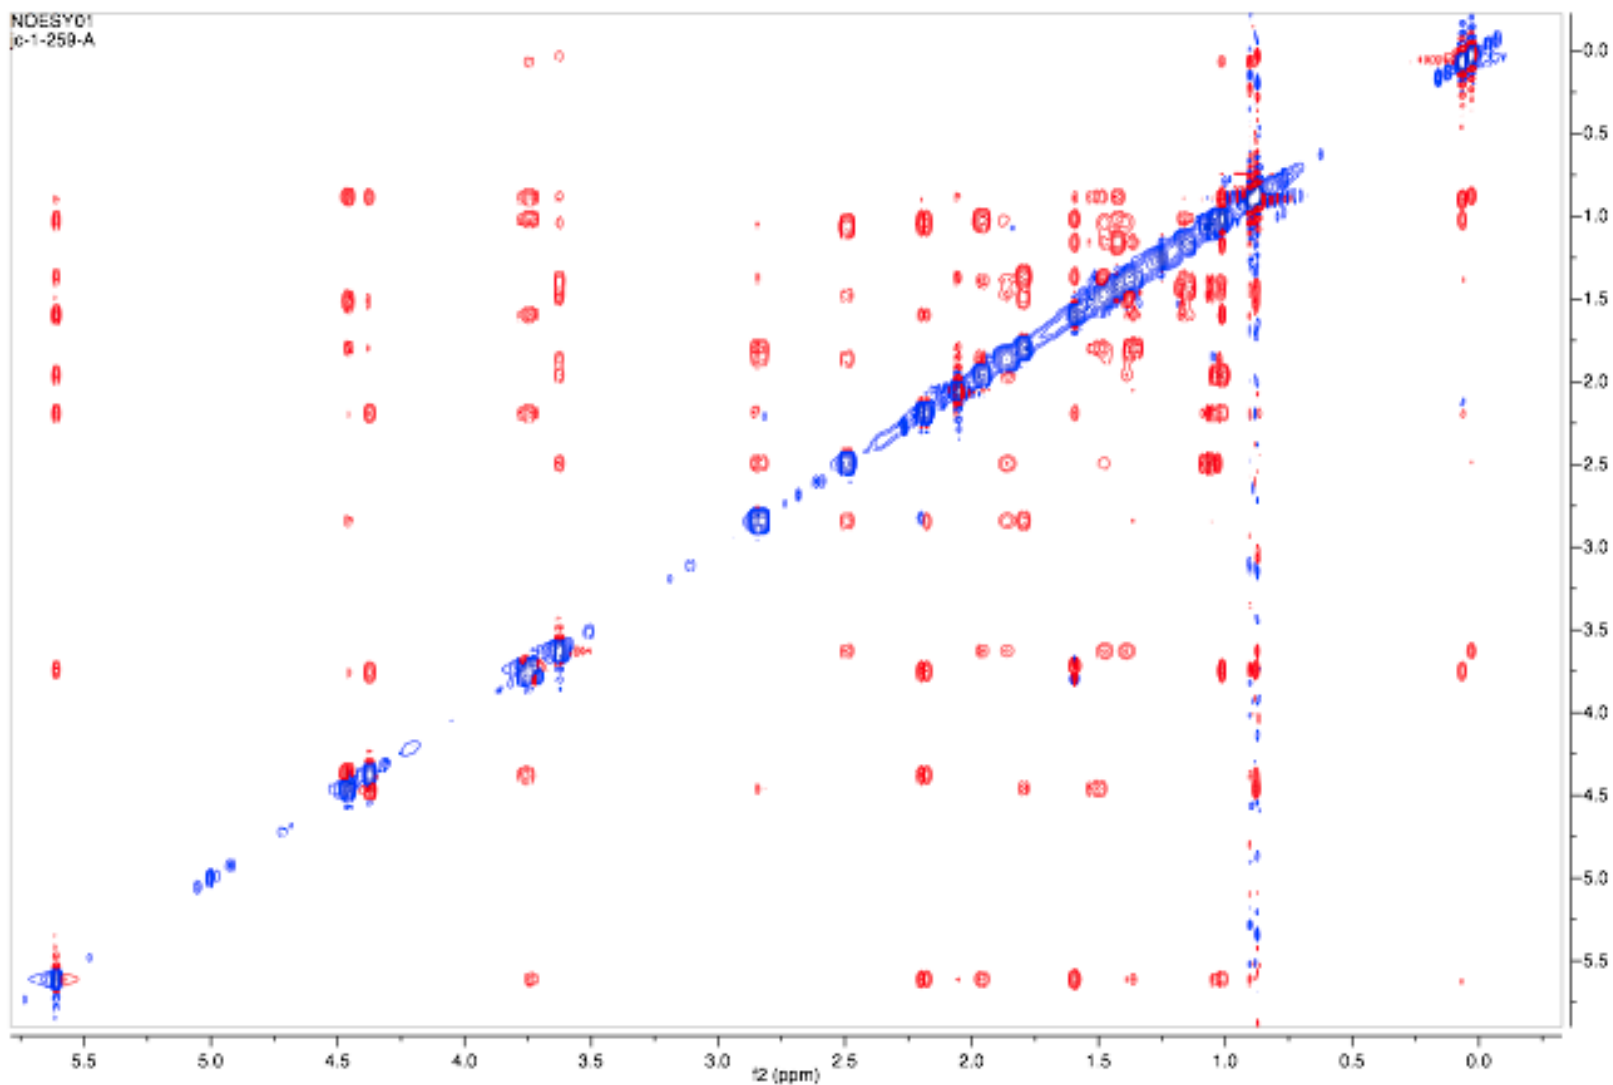

jtsy-ix-237flash

Sample Name:  
jtsy-ix-237flash  
Data Collected on:  
indy.caltech.edu-inova500  
Archive directory:  
/home/yeomanjo/vnmrsys/data  
Sample directory:  
jtsy-ix-237flash  
FidFile: PROTON01

Pulse Sequence: PROTON (s2pul)  
Solvent: cdcl3  
Data collected on: Dec 22 2013

Sample #7, Operator: yeomanjo

Relax. delay 10.000 sec  
Pulse 45.0 degrees  
Acq. time 3.000 sec  
Width 8000.0 Hz  
8 repetitions  
OBSERVE H1, 499.6951455 MHz  
DATA PROCESSING  
Line broadening 0.4 Hz  
FT size 65536  
Total time 1 min 44 sec

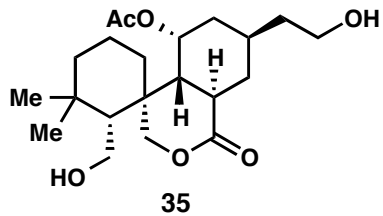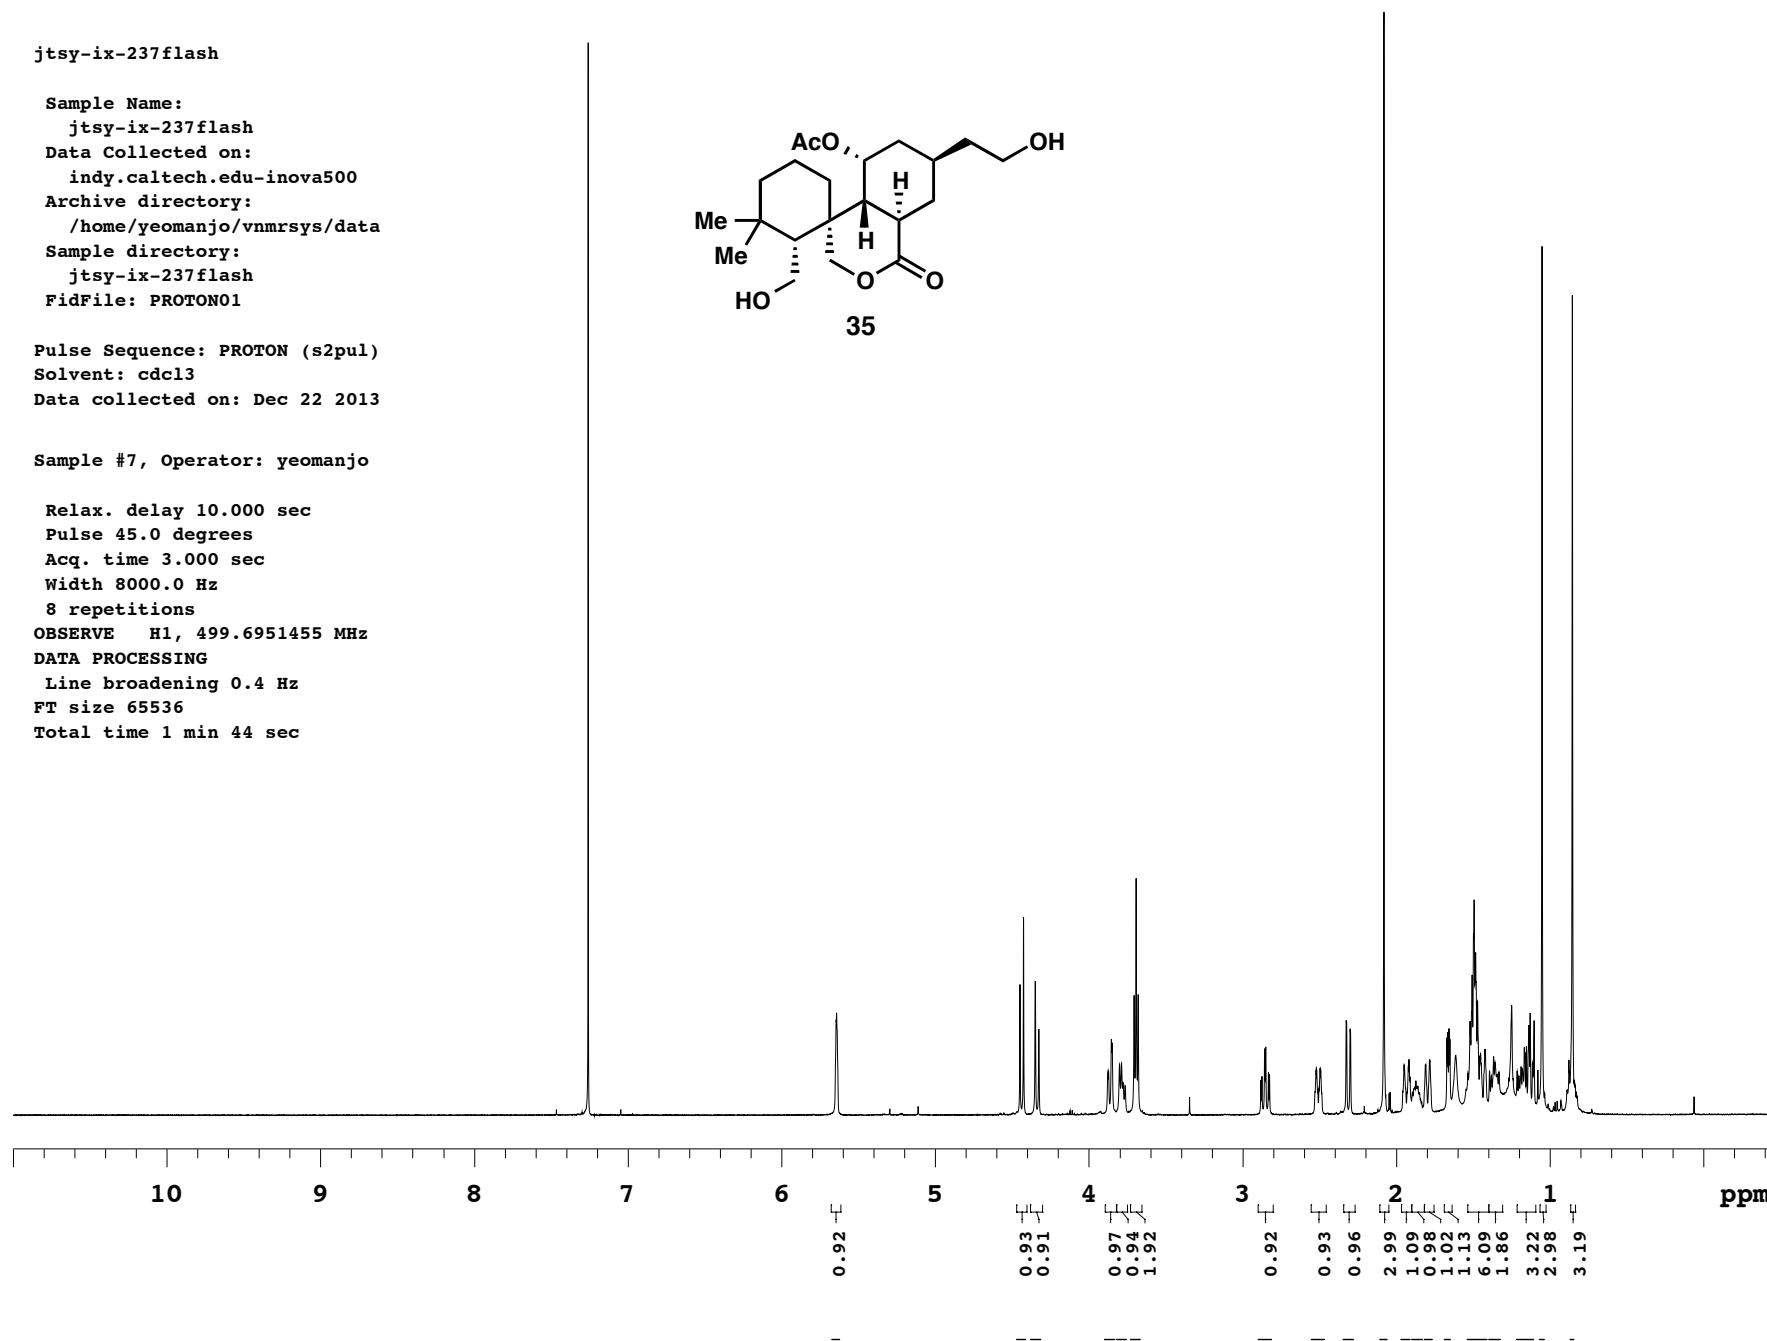

jtsy-ix-237flash

Sample Name:  
jtsy-ix-237flash  
Data Collected on:  
indy.caltech.edu-inova500  
Archive directory:  
/home/yeomanjo/vnmrsys/data  
Sample directory:  
jtsy-ix-237flash  
FidFile: CARBON01

Pulse Sequence: CARBON (s2pul)  
Solvent: cdcl3  
Data collected on: Dec 22 2013

Sample #7, Operator: yeomanjo

Relax. delay 0.100 sec  
Pulse 45.0 degrees  
Acq. time 1.042 sec  
Width 31446.5 Hz  
2000 repetitions  
OBSERVE C13, 125.6484452 MHz  
DECOUPLE H1, 499.6976415 MHz  
Power 40 dB  
continuously on  
WALTZ-16 modulated  
DATA PROCESSING  
Line broadening 0.5 Hz  
FT size 65536  
Total time 38 min

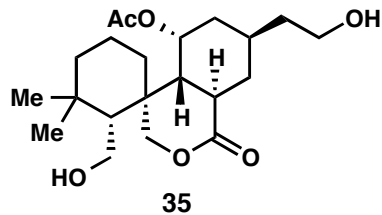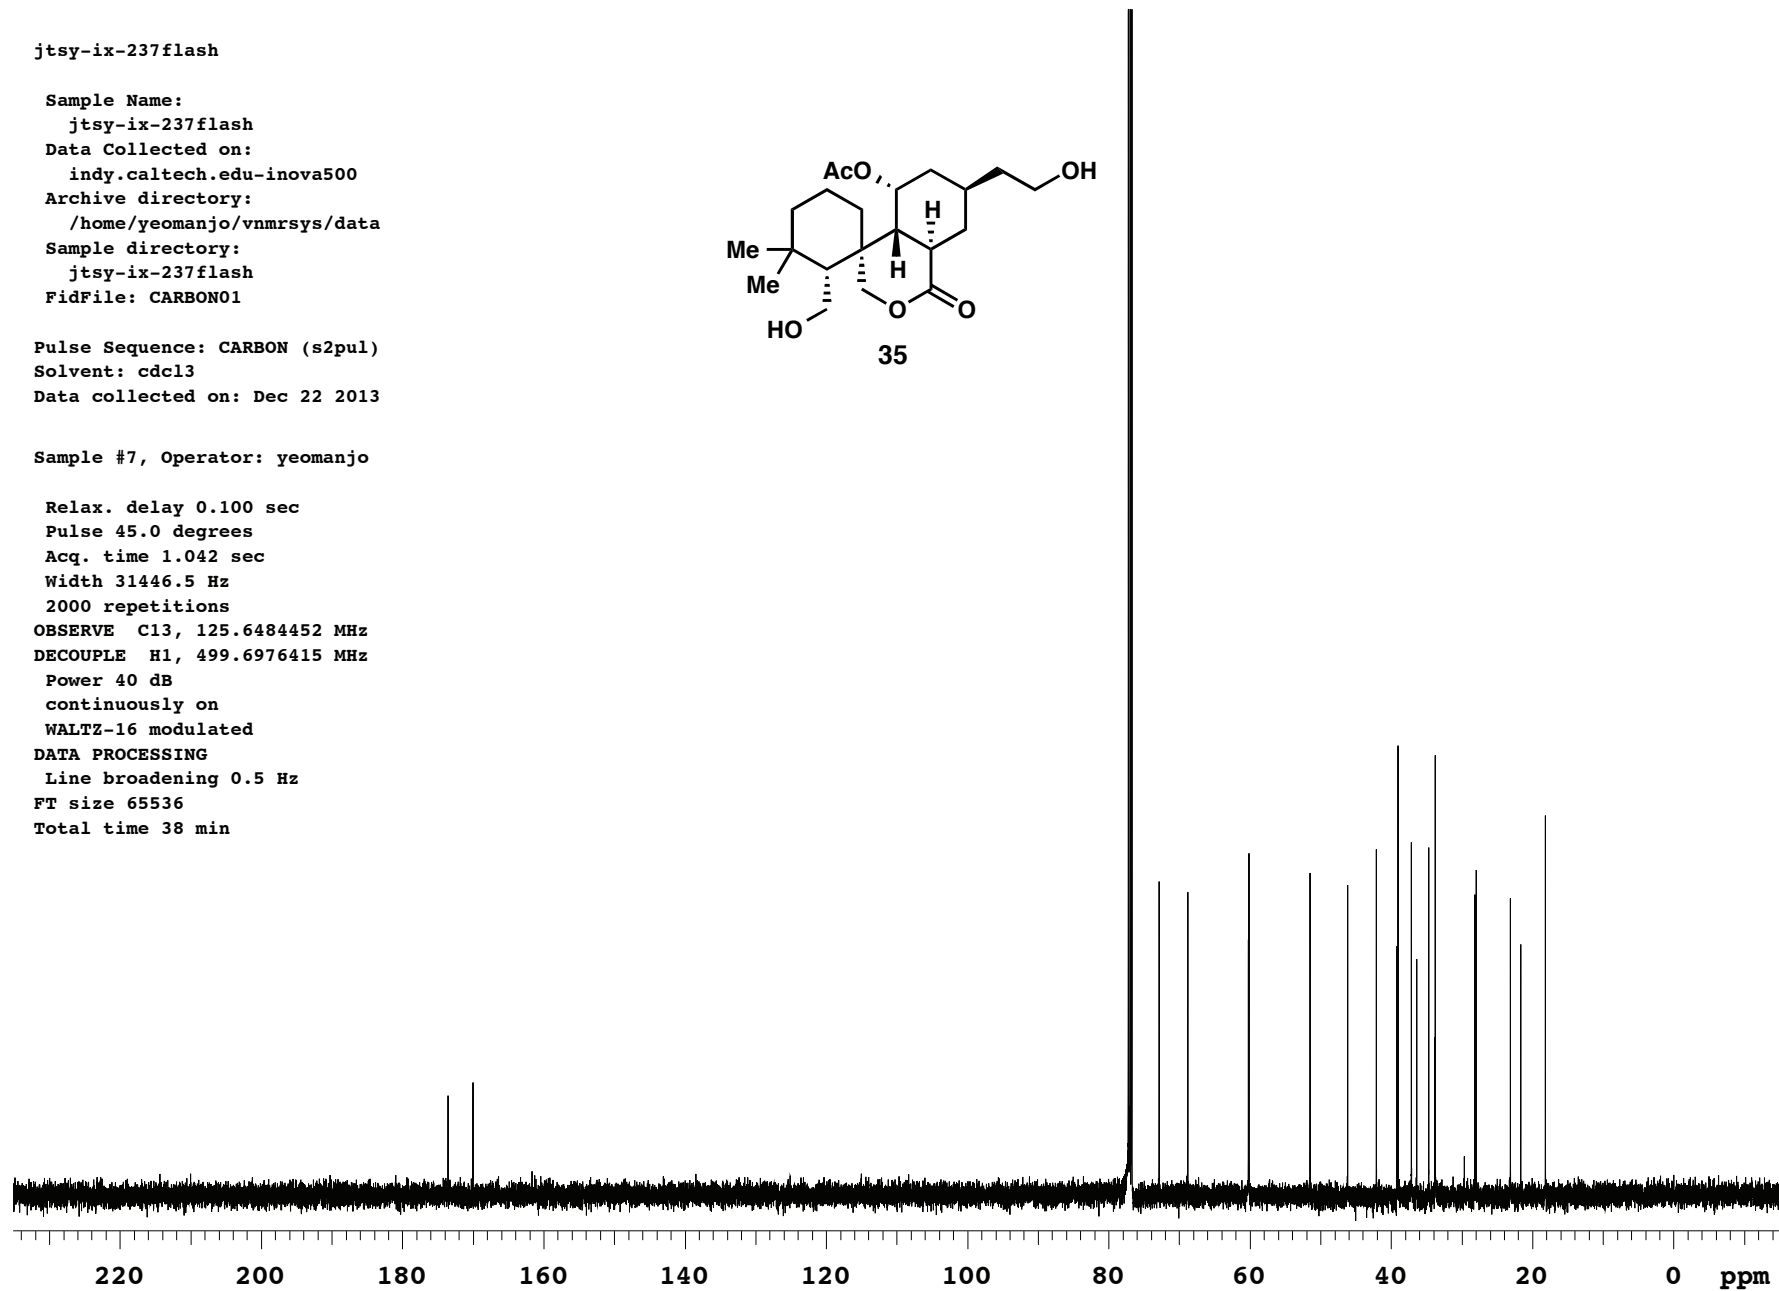

jtsy-ix-243f10-20

Sample Name:  
jtsy-ix-243f10-20  
Data Collected on:  
indy.caltech.edu-inova500  
Archive directory:  
/home/yeomanjo/vnmrsys/data  
Sample directory:  
jtsy-ix-243f10-20  
FidFile: PROTON01

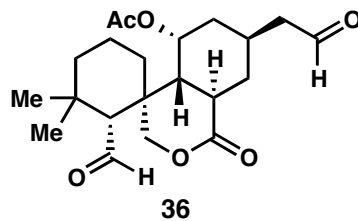

Pulse Sequence: PROTON (s2pul)  
Solvent: cdcl3  
Data collected on: Jan 2 2014

Sample #37, Operator: yeomanjo

Relax. delay 10.000 sec  
Pulse 45.0 degrees  
Acq. time 3.000 sec  
Width 8000.0 Hz  
8 repetitions  
OBSERVE H1, 499.6951455 MHz  
DATA PROCESSING  
Line broadening 0.8 Hz  
FT size 65536  
Total time 1 min 44 sec

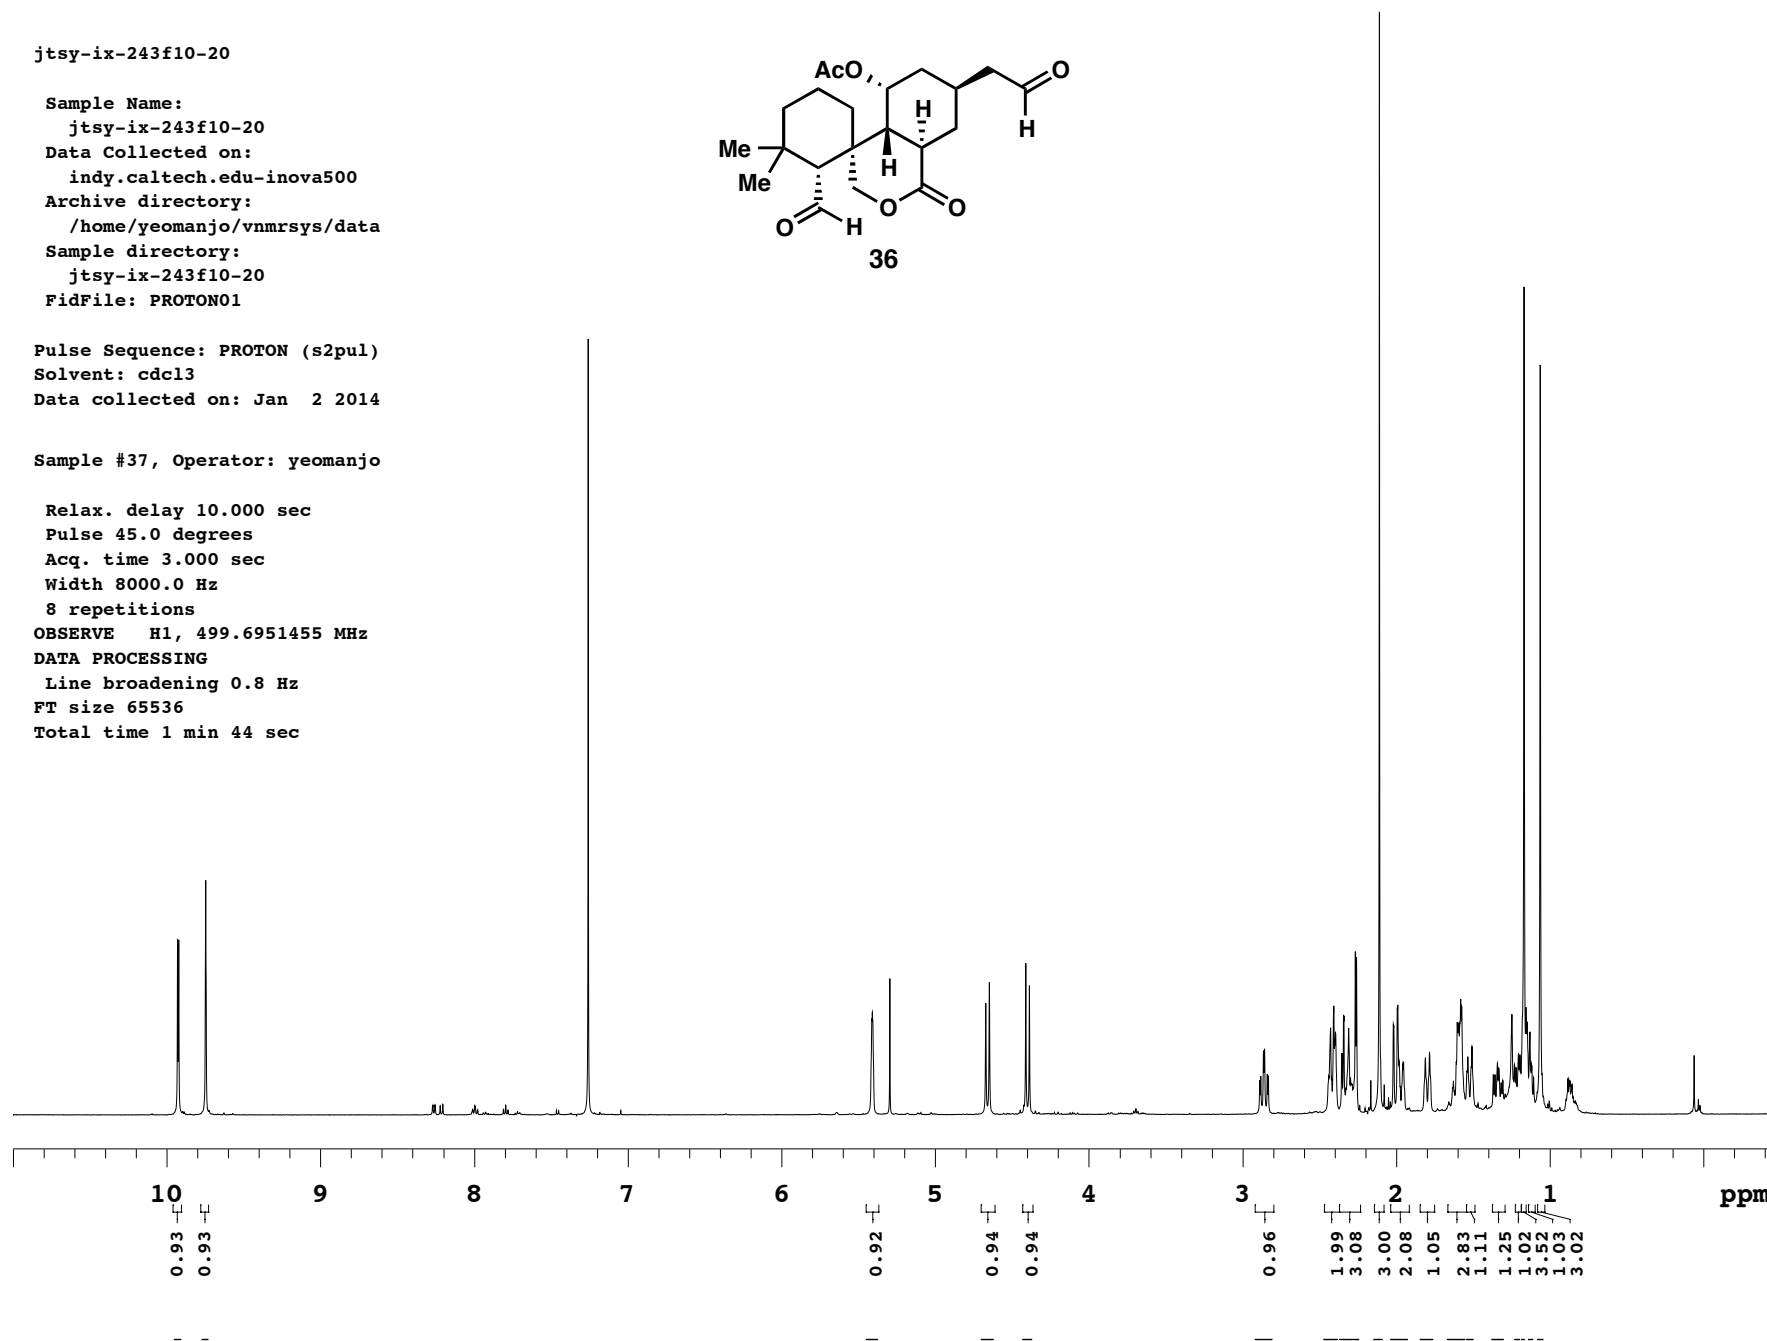

jtsy-ix-243f10-20

Sample Name:  
jtsy-ix-243f10-20  
Data Collected on:  
indy.caltech.edu-inova500  
Archive directory:  
/home/yeomanjo/vnmrsys/data  
Sample directory:  
jtsy-ix-243f10-20  
FidFile: CARBON01

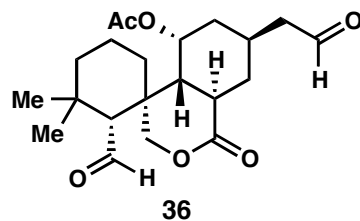

Pulse Sequence: CARBON (s2pul)  
Solvent: cdcl3  
Data collected on: Jan 2 2014

Sample #37, Operator: yeomanjo

Relax. delay 1.000 sec  
Pulse 45.0 degrees  
Acq. time 1.042 sec  
Width 31446.5 Hz  
2000 repetitions  
OBSERVE C13, 125.6484452 MHz  
DECOUPLE H1, 499.6976415 MHz  
Power 40 dB  
continuously on  
WALTZ-16 modulated  
DATA PROCESSING  
Line broadening 0.6 Hz  
FT size 65536  
Total time 1 hr, 8 min

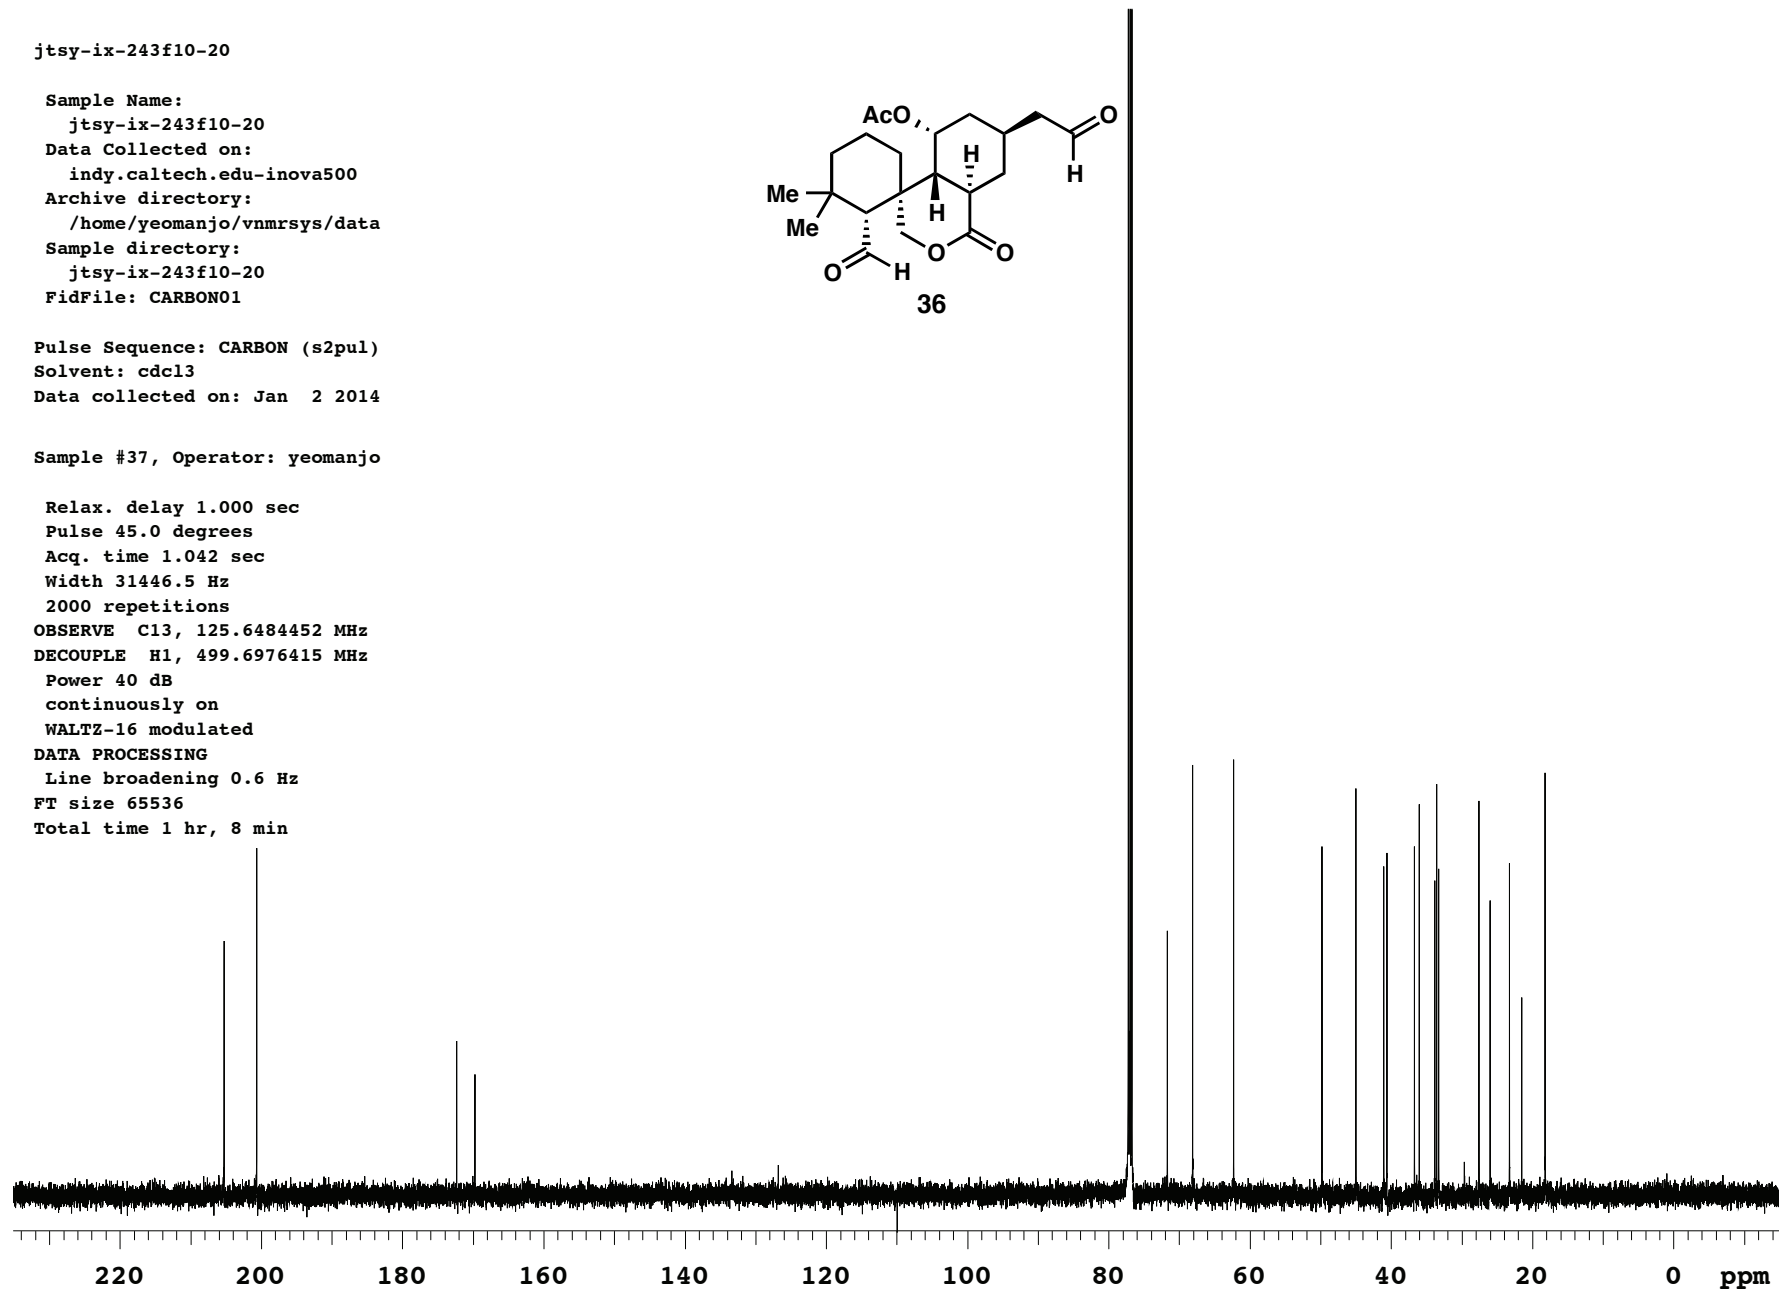

Sample Name:  
jtsy-ix-251  
Data Collected on:  
fid.caltech.edu-inova600  
Archive directory:

Sample directory:

FidFile: jtsy-ix-251

Pulse Sequence: PROTON (s2pul)  
Solvent: cdcl3  
Data collected on: Jan 10 2014

Temp. 25.0 C / 298.1 K  
Operator: yeomanjo

Relax. delay 10.000 sec  
Pulse 45.0 degrees  
Acq. time 1.708 sec  
Width 9594.6 Hz  
8 repetitions  
OBSERVE H1, 599.6298597 MHz  
DATA PROCESSING  
Line broadening 0.6 Hz  
FT size 32768  
Total time 1 min 34 sec

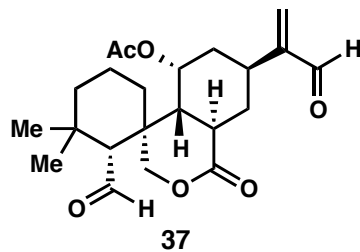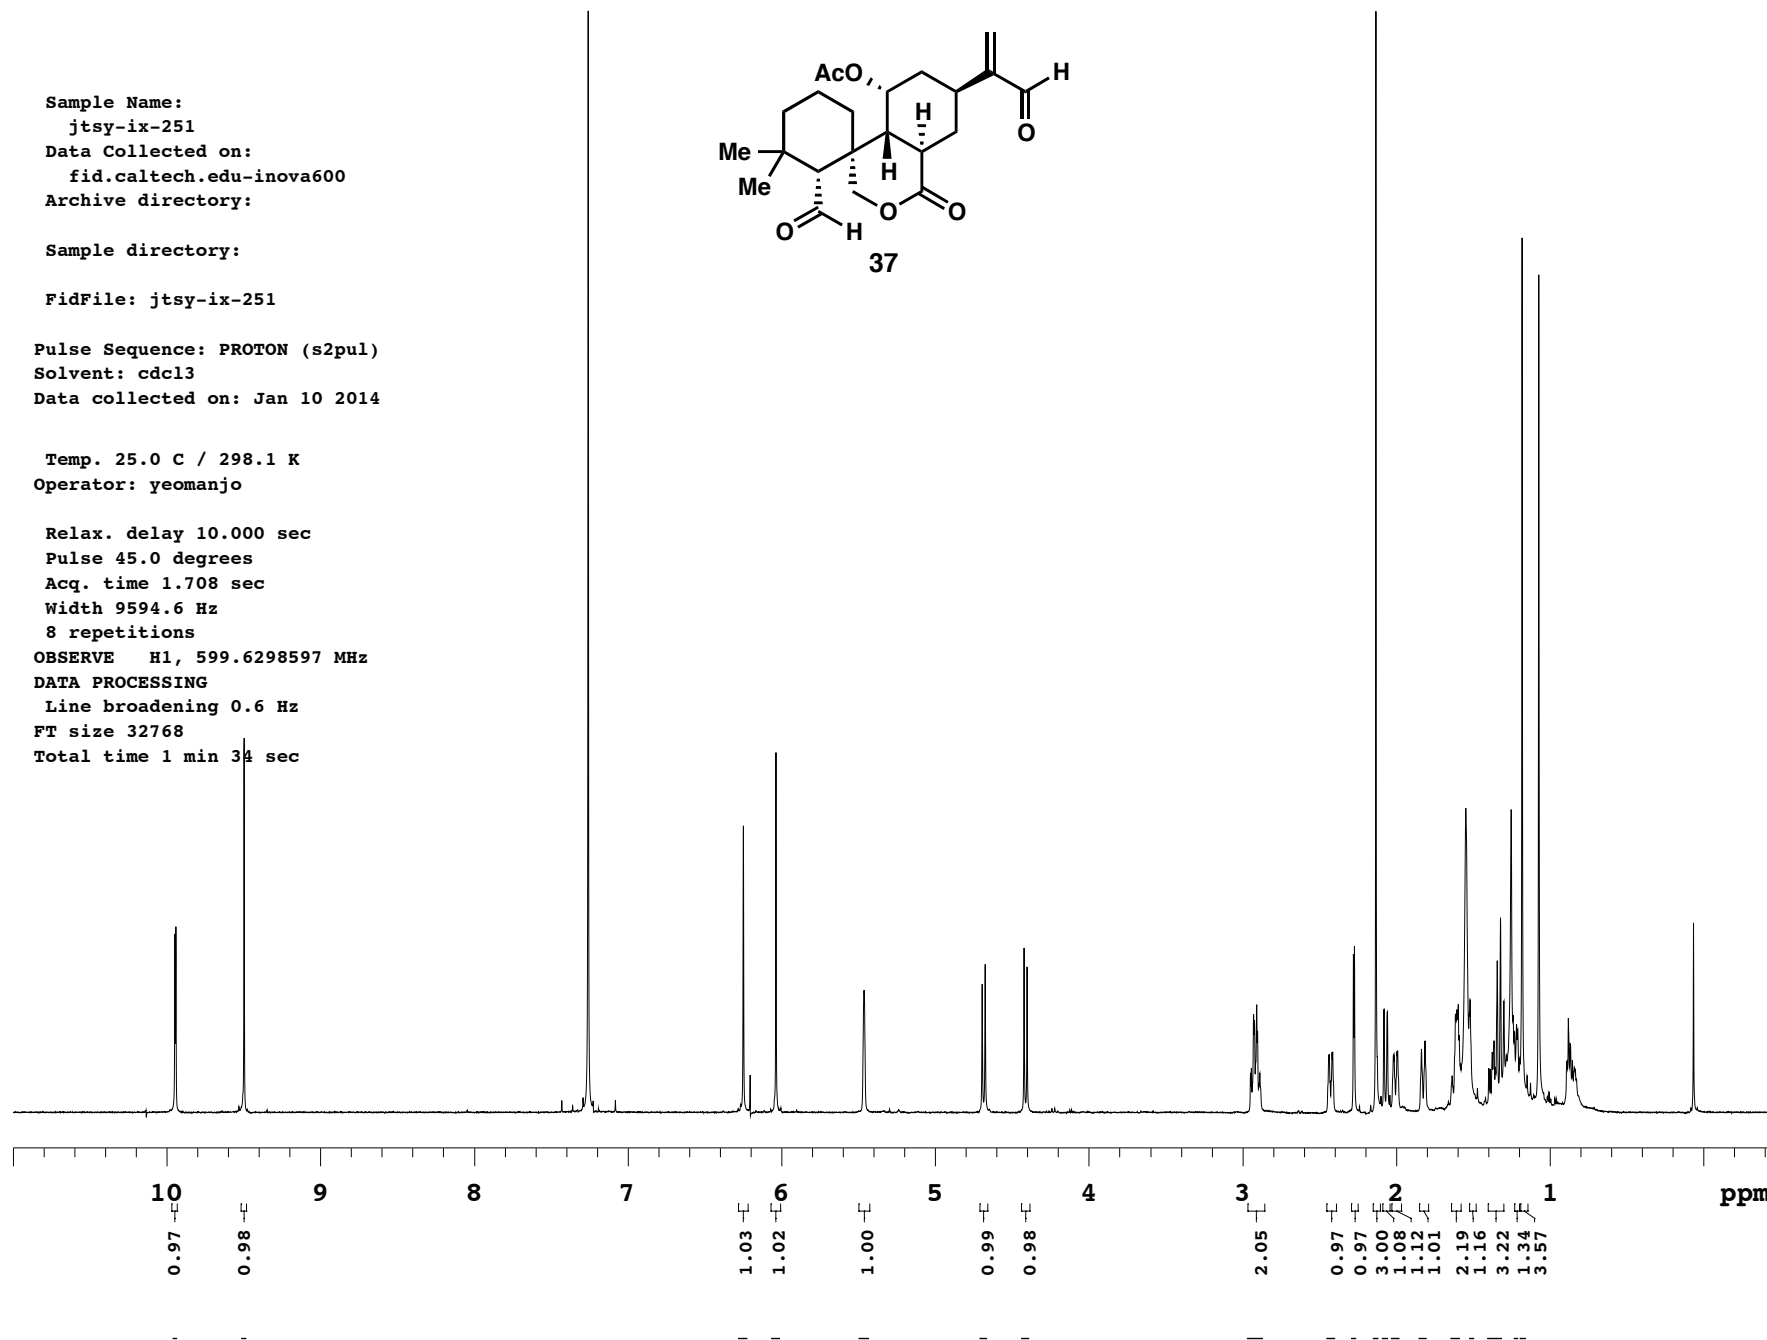

jtsy-ix-251f25-33

Sample Name:  
jtsy-ix-251f25-33  
Data Collected on:  
indy.caltech.edu-inova500  
Archive directory:  
/home/yeomanjo/vnmrsys/data  
Sample directory:  
jtsy-ix-251f25-33  
FidFile: CARBON01

Pulse Sequence: CARBON (s2pul)  
Solvent: cdcl3  
Data collected on: Jan 7 2014

Sample #1, Operator: yeomanjo

Relax. delay 0.100 sec  
Pulse 45.0 degrees  
Acq. time 1.042 sec  
Width 31446.5 Hz  
3100 repetitions  
OBSERVE C13, 125.6484443 MHz  
DECOUPLE H1, 499.6976415 MHz  
Power 40 dB  
continuously on  
WALTZ-16 modulated  
DATA PROCESSING  
Line broadening 2.0 Hz  
FT size 65536  
Total time 59 min

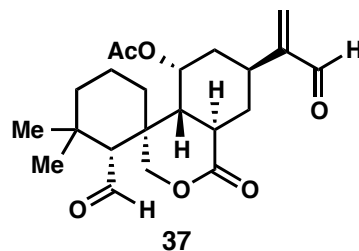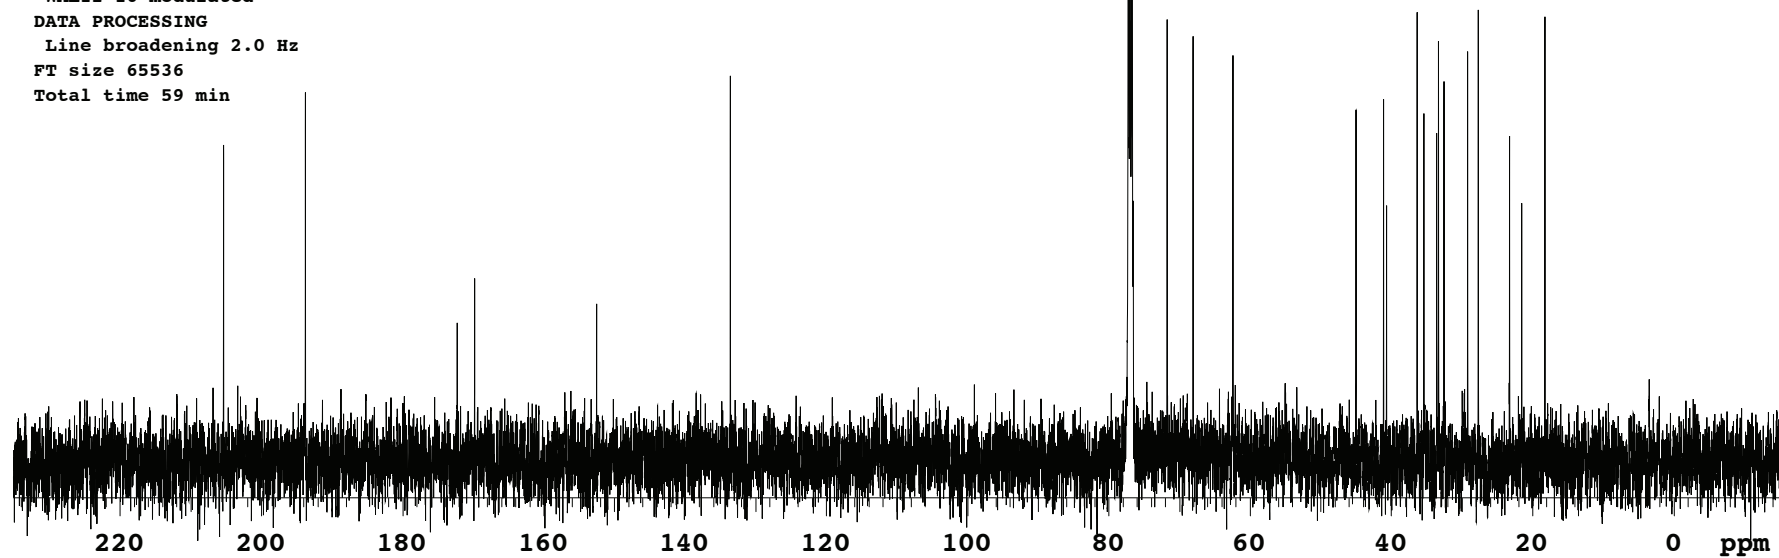

Sample Name:  
 jtsy-ix-249Af13-22  
 Data Collected on:  
 fid.caltech.edu-inova600  
 Archive directory:  
 /home/yeomanjo/vnmrsys/data  
 Sample directory:  
 VWM1-251-f25-36  
 FidFile: jtsy-ix-249Af13-22

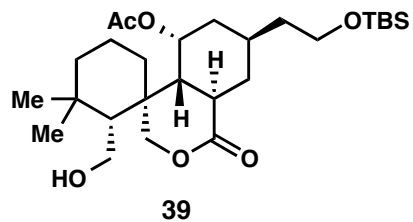

Pulse Sequence: PROTON (s2pul)  
 Solvent: cdcl3  
 Data collected on: Jan 6 2014

Operator: yeomanjo

Relax. delay 10.000 sec  
 Pulse 45.0 degrees  
 Acq. time 1.708 sec  
 Width 9594.6 Hz  
 8 repetitions  
 OBSERVE H1, 599.6298598 MHz  
 DATA PROCESSING  
 Line broadening 0.4 Hz  
 FT size 32768  
 Total time 1 min 34 sec

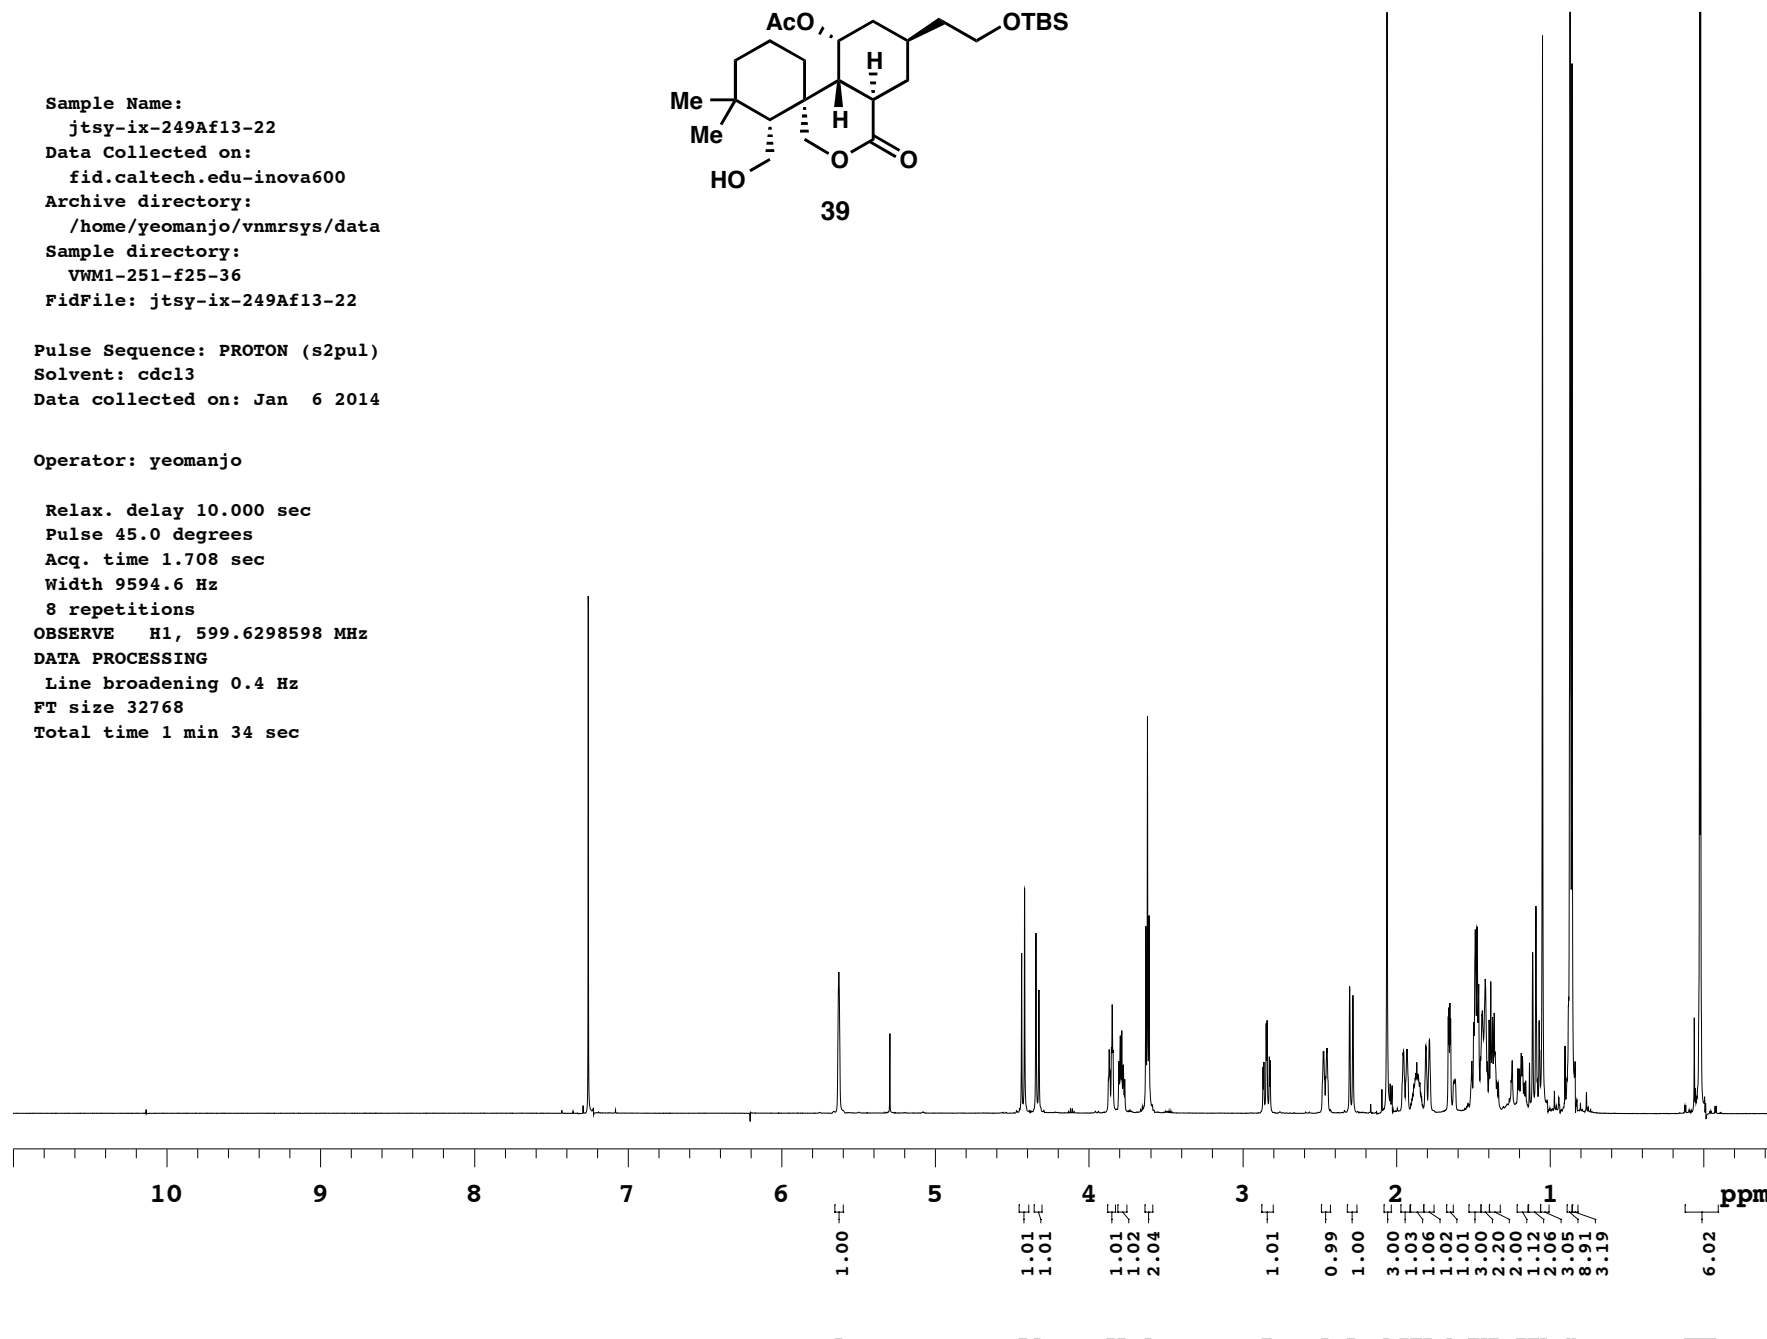



jtsy-ix-249Af13-22

Sample Name:  
jtsy-ix-249Af13-22  
Data Collected on:  
indy.caltech.edu-inova500  
Archive directory:  
/home/yeomanjo/vnmrsys/data  
Sample directory:  
jtsy-ix-249Af13-22  
FidFile: CARBON01

Pulse Sequence: CARBON (s2pul)  
Solvent: cdcl3  
Data collected on: Jan 6 2014

Sample #2, Operator: yeomanjo

Relax. delay 0.100 sec  
Pulse 45.0 degrees  
Acq. time 1.042 sec  
Width 31446.5 Hz  
1600 repetitions  
OBSERVE C13, 125.6484452 MHz  
DECOUPLE H1, 499.6976415 MHz  
Power 40 dB  
continuously on  
WALTZ-16 modulated  
DATA PROCESSING  
Line broadening 0.5 Hz  
FT size 65536  
Total time 30 min

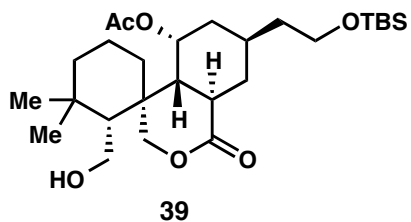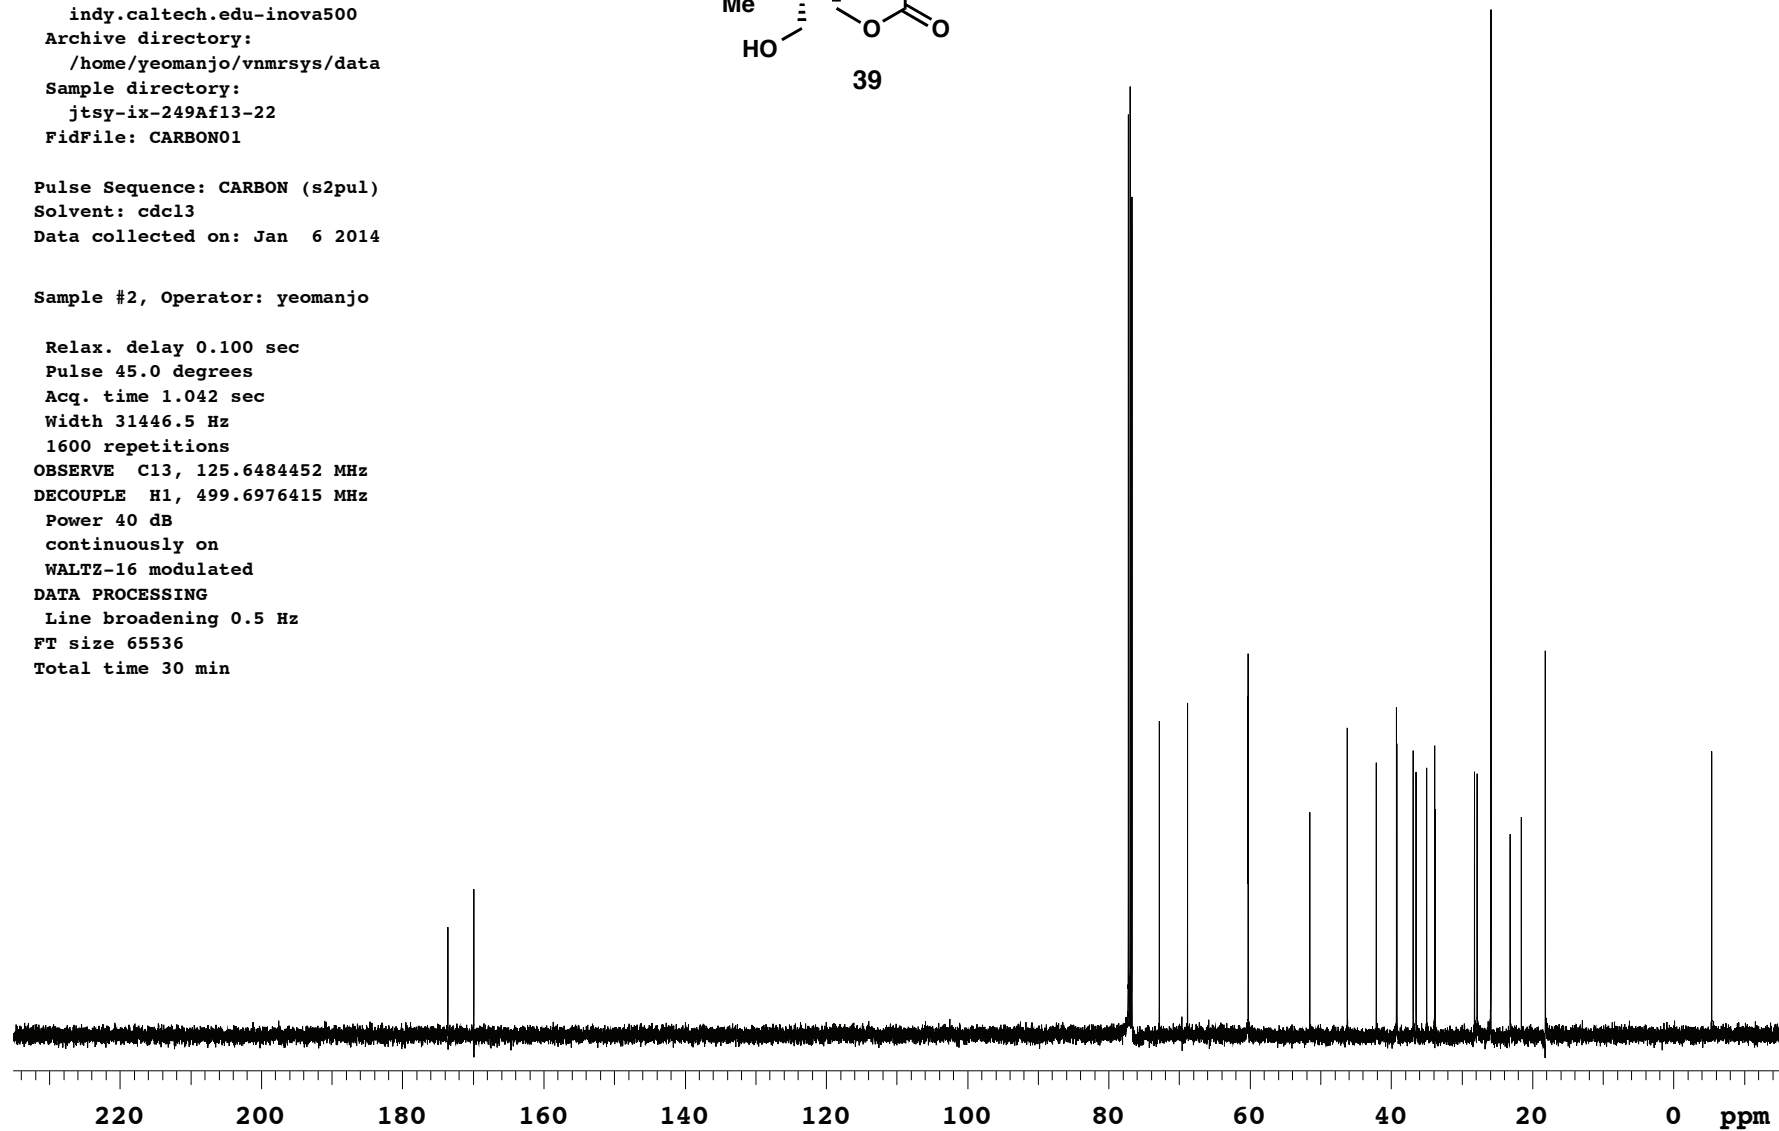

Sample Name:  
 jtsy-ix-257f14-21  
 Data Collected on:  
 fid.caltech.edu-inova600  
 Archive directory:  
 /home/yeomanjo/vnmrsys/data  
 Sample directory:  
 VWM1-251-f25-36  
 FidFile: jtsy-ix-257f14-21

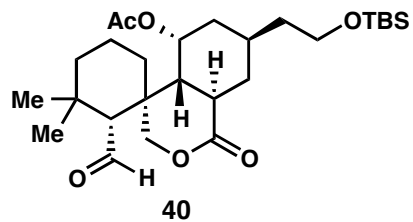

Pulse Sequence: PROTON (s2pul)  
 Solvent: cdcl3  
 Data collected on: Jan 8 2014

Temp. 25.0 C / 298.1 K  
 Operator: yeomanjo

Relax. delay 10.000 sec  
 Pulse 45.0 degrees  
 Acq. time 1.708 sec  
 Width 9594.6 Hz  
 8 repetitions  
 OBSERVE H1, 599.6298598 MHz  
 DATA PROCESSING  
 Line broadening 0.4 Hz  
 FT size 32768  
 Total time 1 min 34 sec

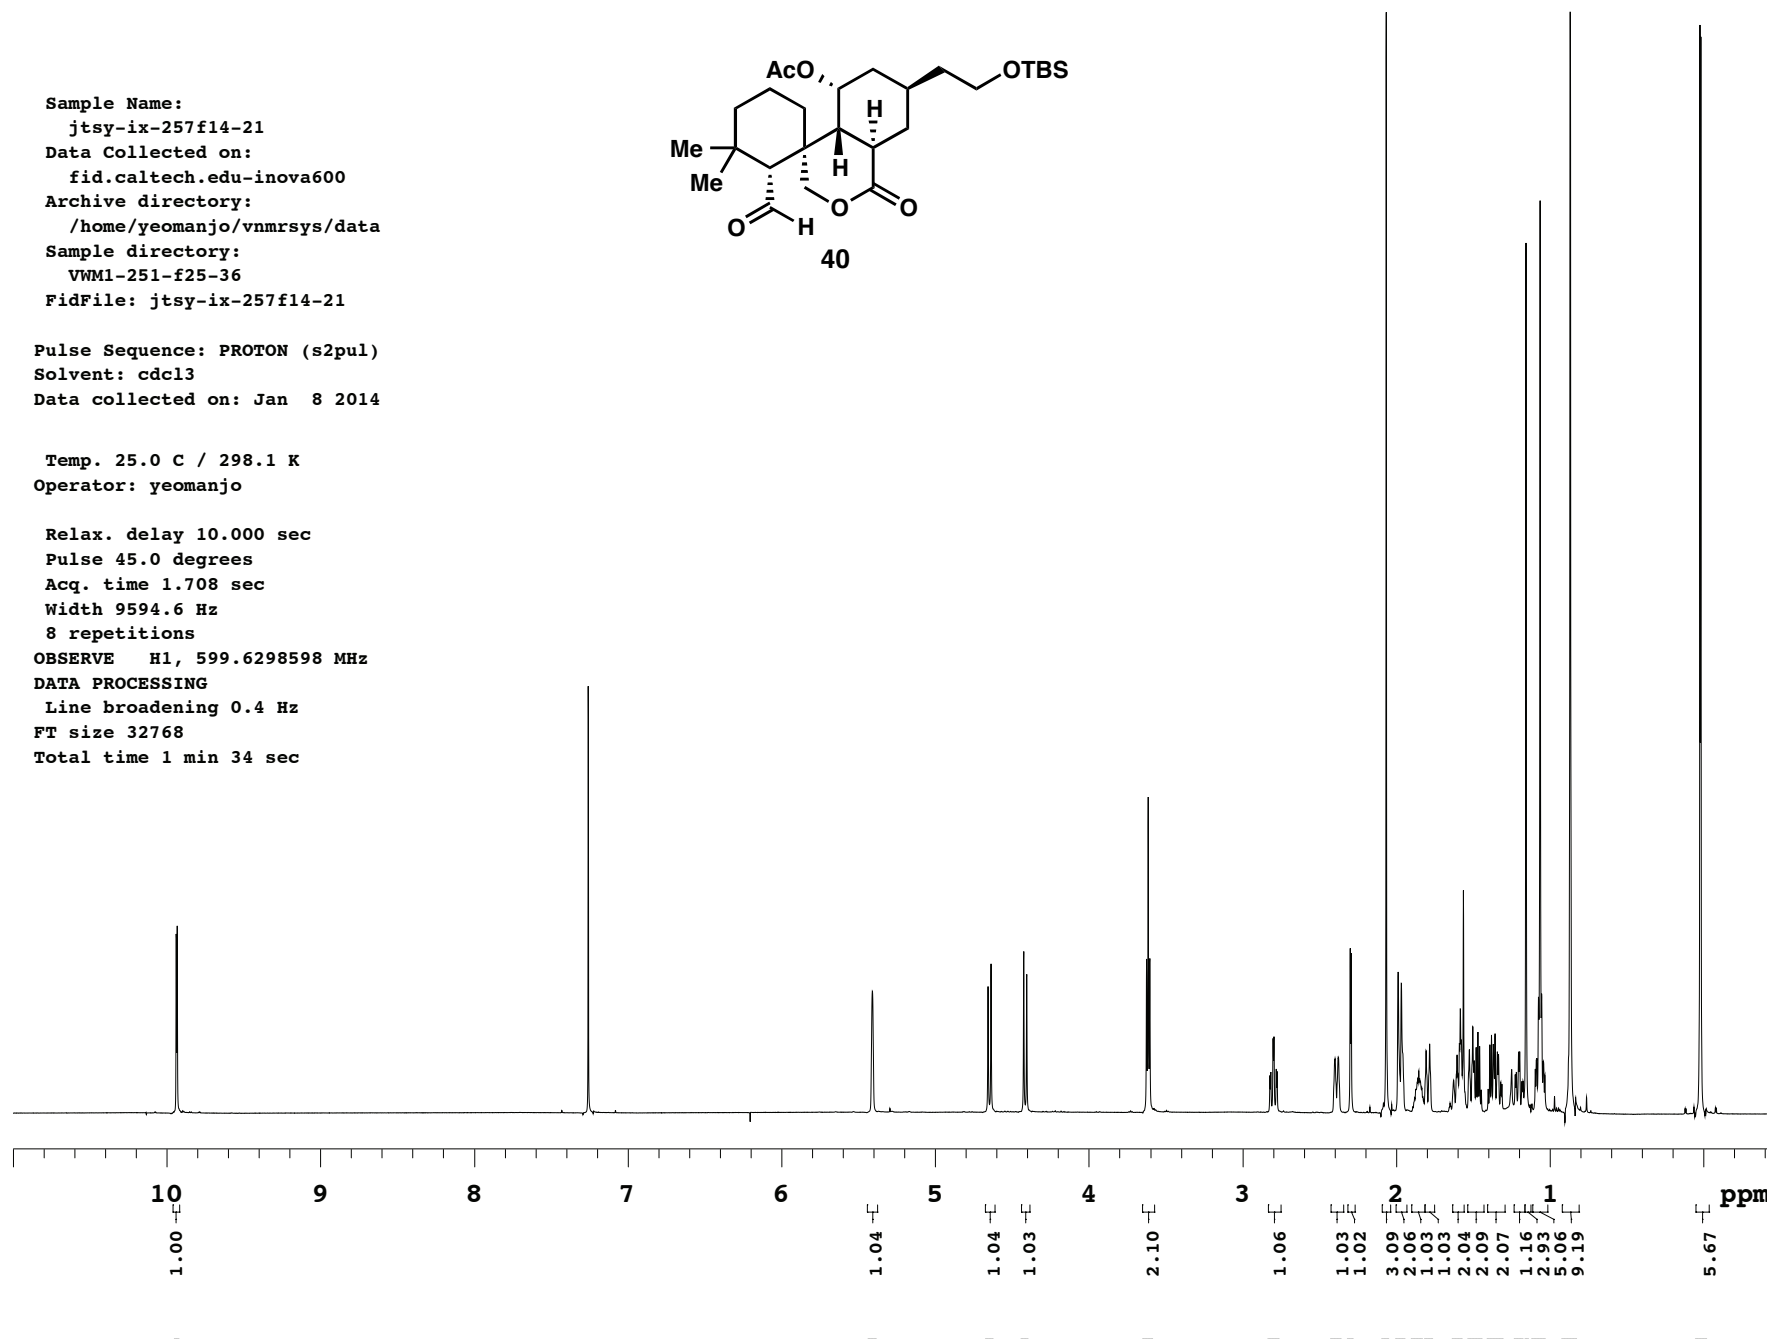

jtsy-ix-257f14-21

Sample Name:  
jtsy-ix-257f14-21  
Data Collected on:  
indy.caltech.edu-inova500  
Archive directory:  
/home/yeomanjo/vnmrsys/data  
Sample directory:  
jtsy-ix-257f14-21  
FidFile: CARBON01

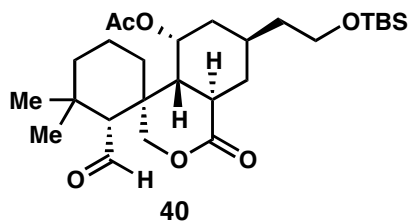

Pulse Sequence: CARBON (s2pul)  
Solvent: cdcl3  
Data collected on: Jan 8 2014

Sample #11, Operator: yeomanjo

Relax. delay 0.100 sec  
Pulse 45.0 degrees  
Acq. time 1.042 sec  
Width 31446.5 Hz  
1000 repetitions  
OBSERVE C13, 125.6484452 MHz  
DECOUPLE H1, 499.6976415 MHz  
Power 40 dB  
continuously on  
WALTZ-16 modulated  
DATA PROCESSING  
Line broadening 0.5 Hz  
FT size 65536  
Total time 19 min

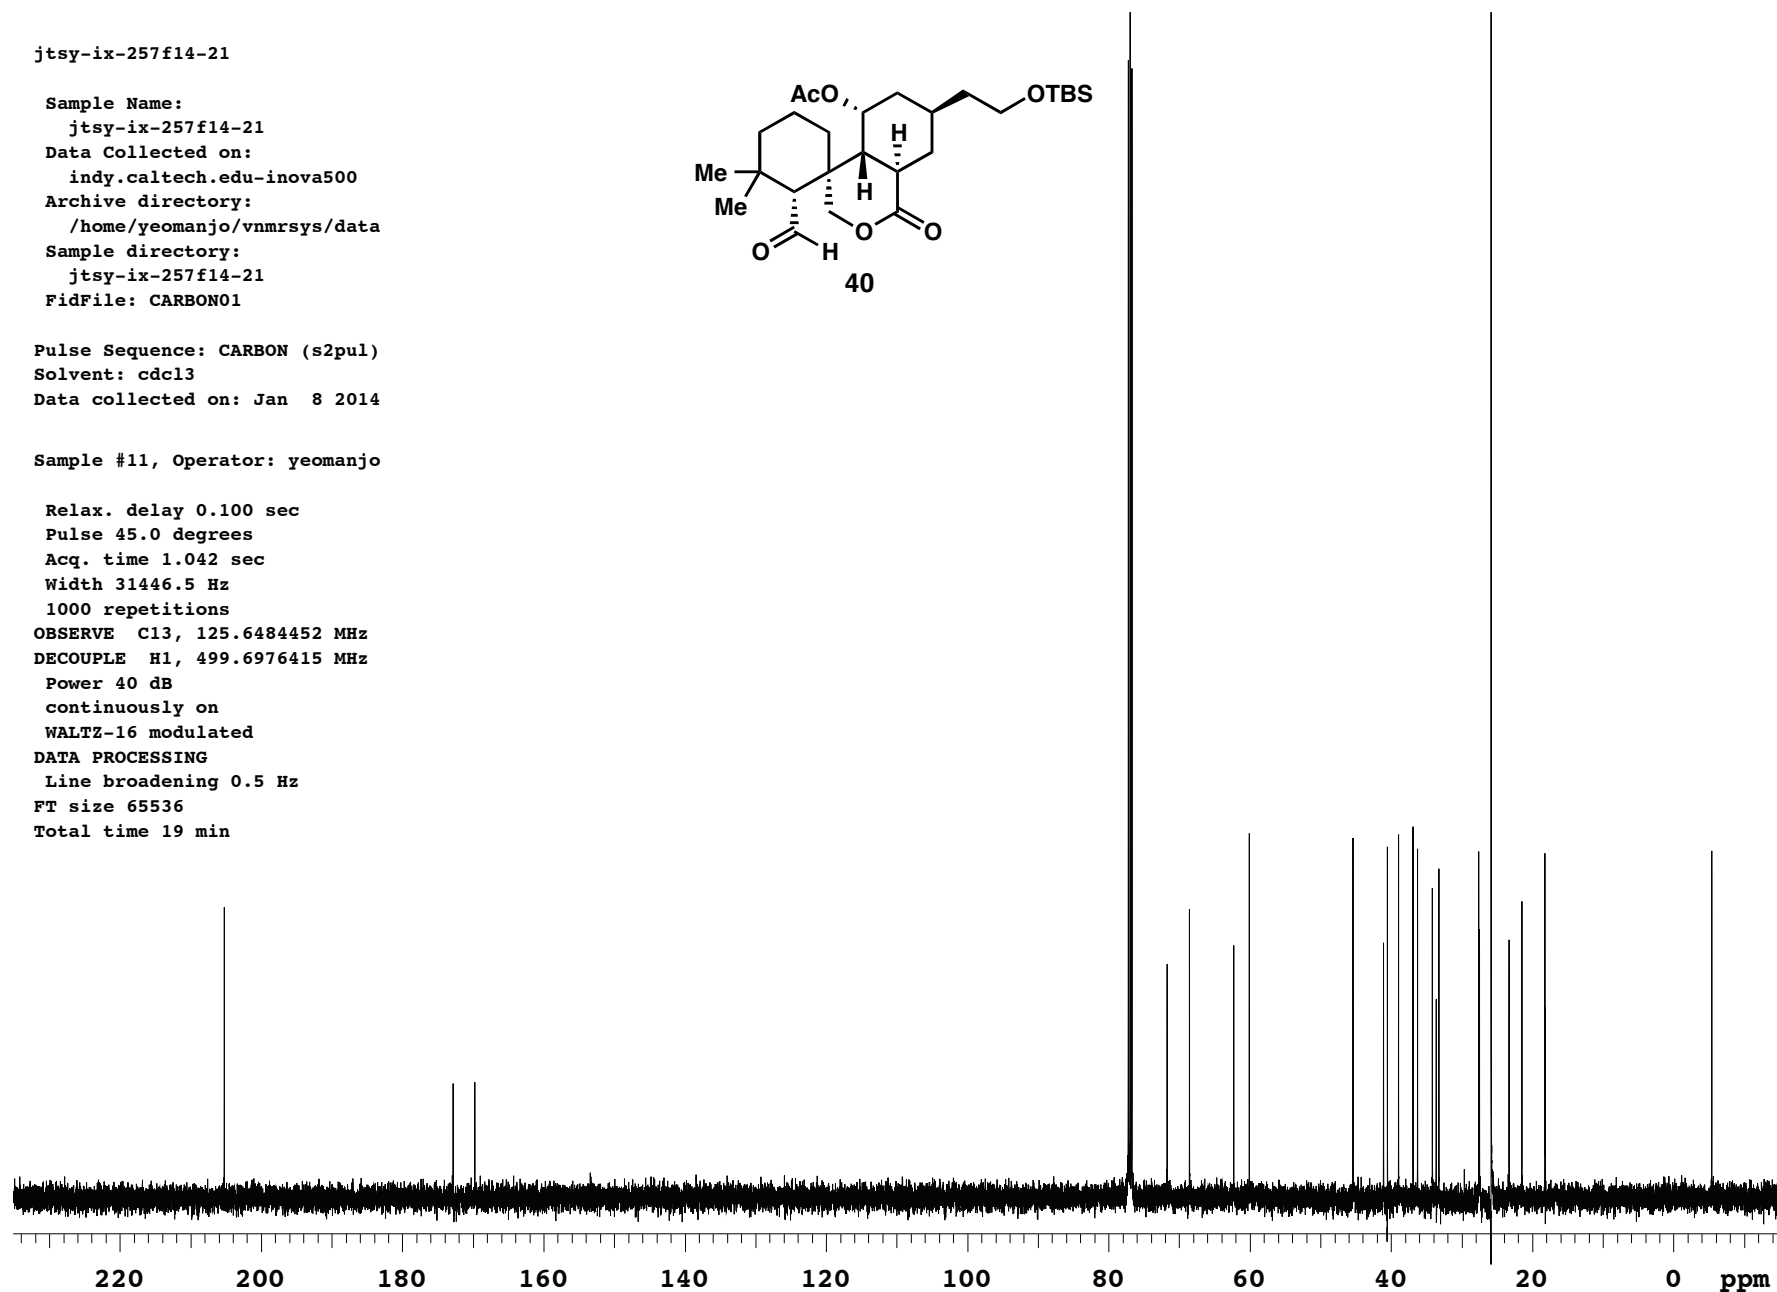

jtsy-vi-105 hi spot

Sample Name:

jtsy-vi-105hi

Data Collected on:

indy.caltech.edu-inova500

Archive directory:

/home/yeomanjo/vnmrsys/data

Sample directory:

jtsy-vi-105hi

FidFile: PROTON01

Pulse Sequence: PROTON (s2pul)

Solvent: cdc13

Data collected on: Jun 6 2011

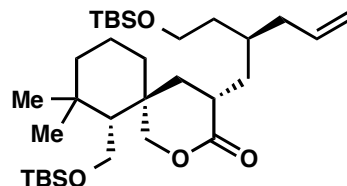

45

less polar diastereomer

Temp. 25.0 C / 298.1 K

Sample #12, Operator: yeomanjo

Relax. delay 5.000 sec

Pulse 45.0 degrees

Acq. time 2.500 sec

Width 8000.0 Hz

8 repetitions

OBSERVE H1, 499.7290203 MHz

DATA PROCESSING

Line broadening 0.2 Hz

FT size 65536

Total time 1 min 0 sec

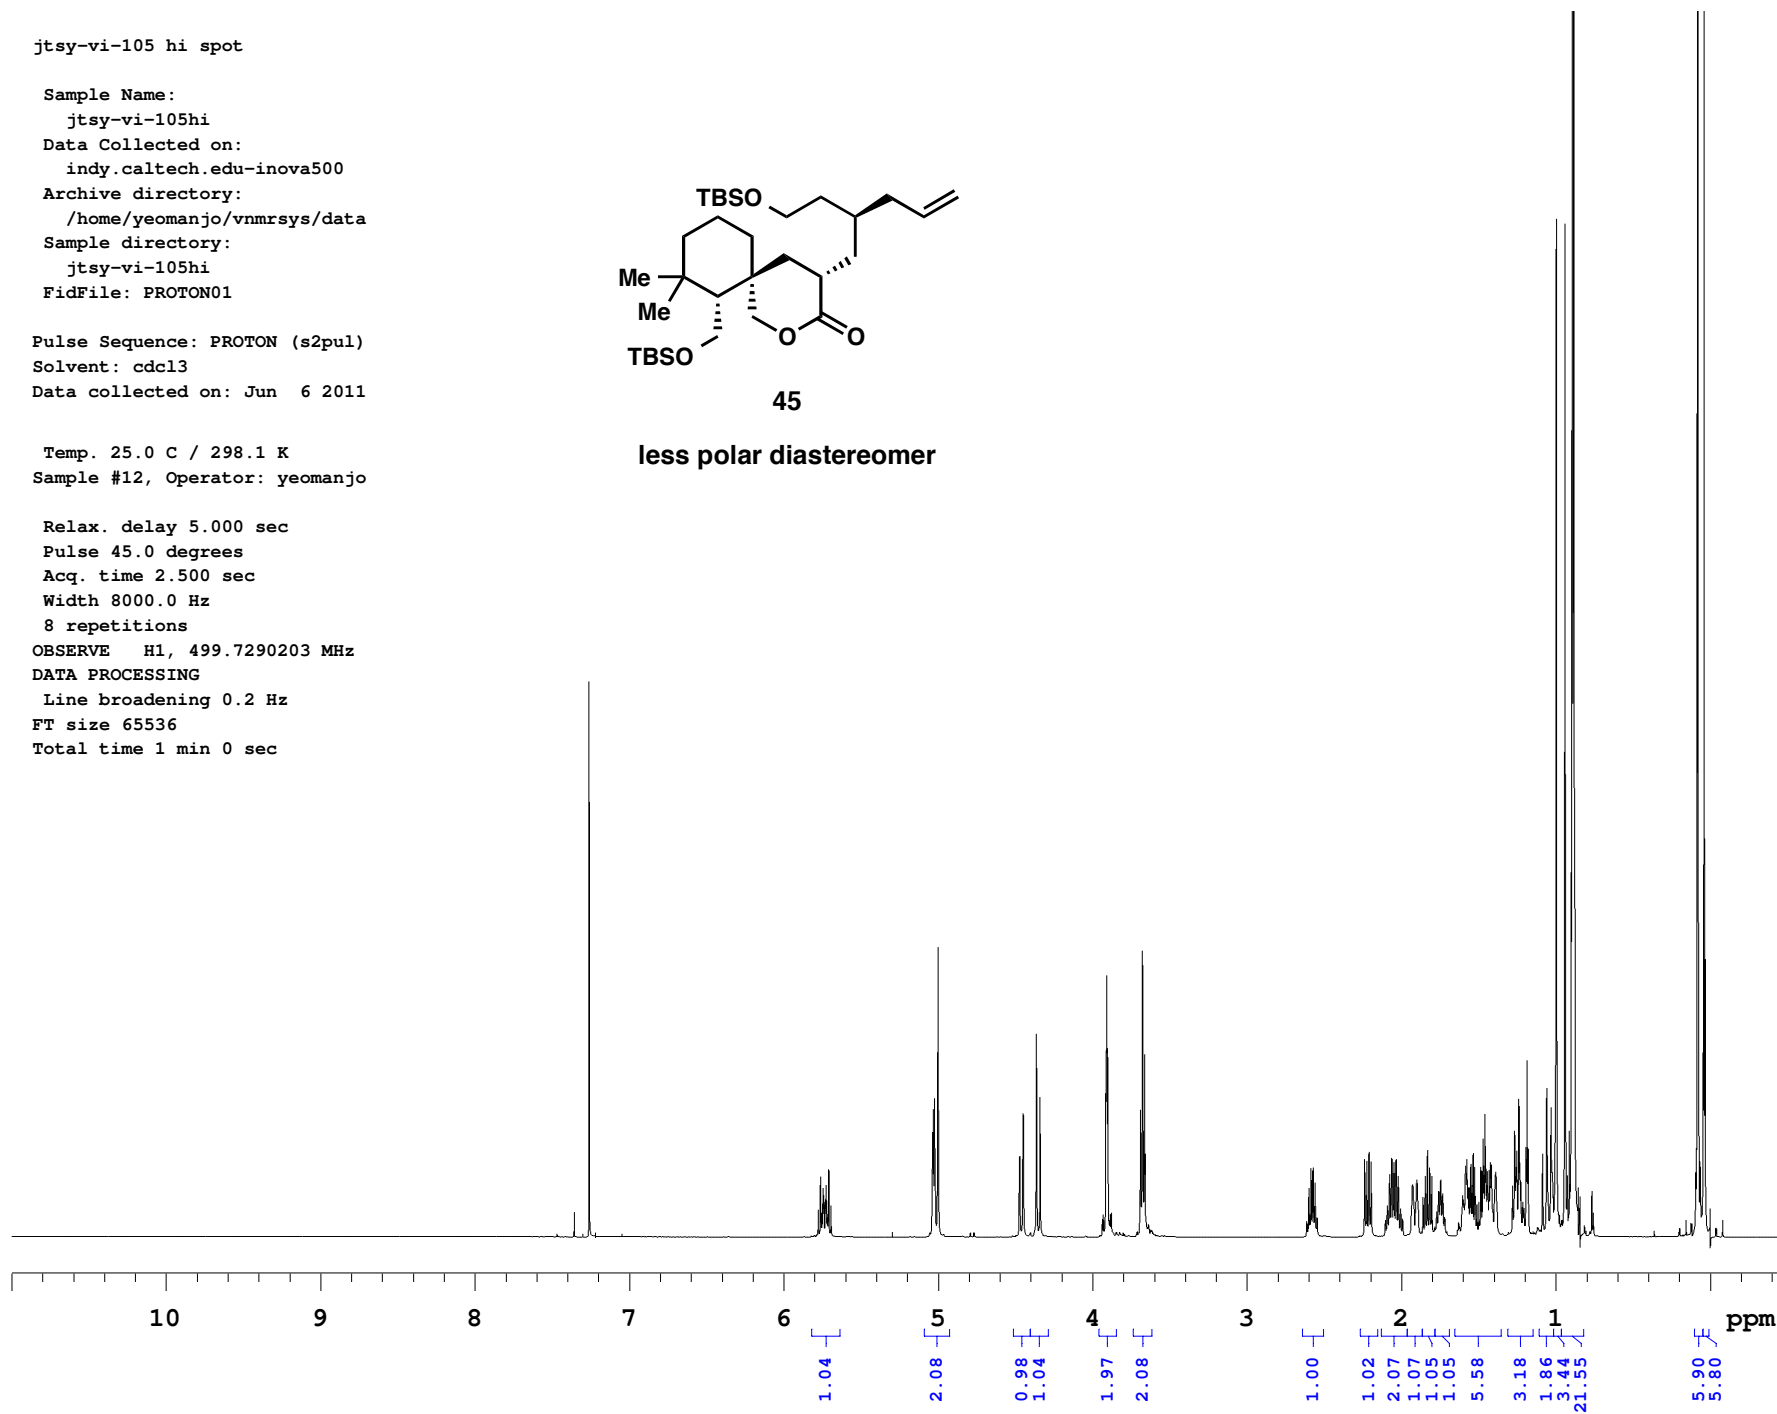

jtsy-vi-105 hi spot

Sample Name:

jtsy-vi-105hi

Data Collected on:

indy.caltech.edu-inova500

Archive directory:

/home/yeomanjo/vnmrsys/data

Sample directory:

jtsy-vi-105hi

FidFile: CARBON01

Pulse Sequence: CARBON (s2pul)

Solvent: cdc13

Data collected on: Jun 6 2011

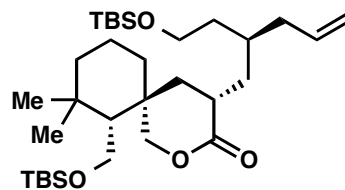

45

less polar diastereomer

Temp. 25.0 C / 298.1 K

Sample #12, Operator: yeomanjo

Relax. delay 1.000 sec

Pulse 45.0 degrees

Acq. time 1.042 sec

Width 31446.5 Hz

1000 repetitions

OBSERVE C13, 125.6569623 MHz

DECOUPLE H1, 499.7315163 MHz

Power 39 dB

continuously on

WALTZ-16 modulated

DATA PROCESSING

Line broadening 0.5 Hz

FT size 65536

Total time 34 min

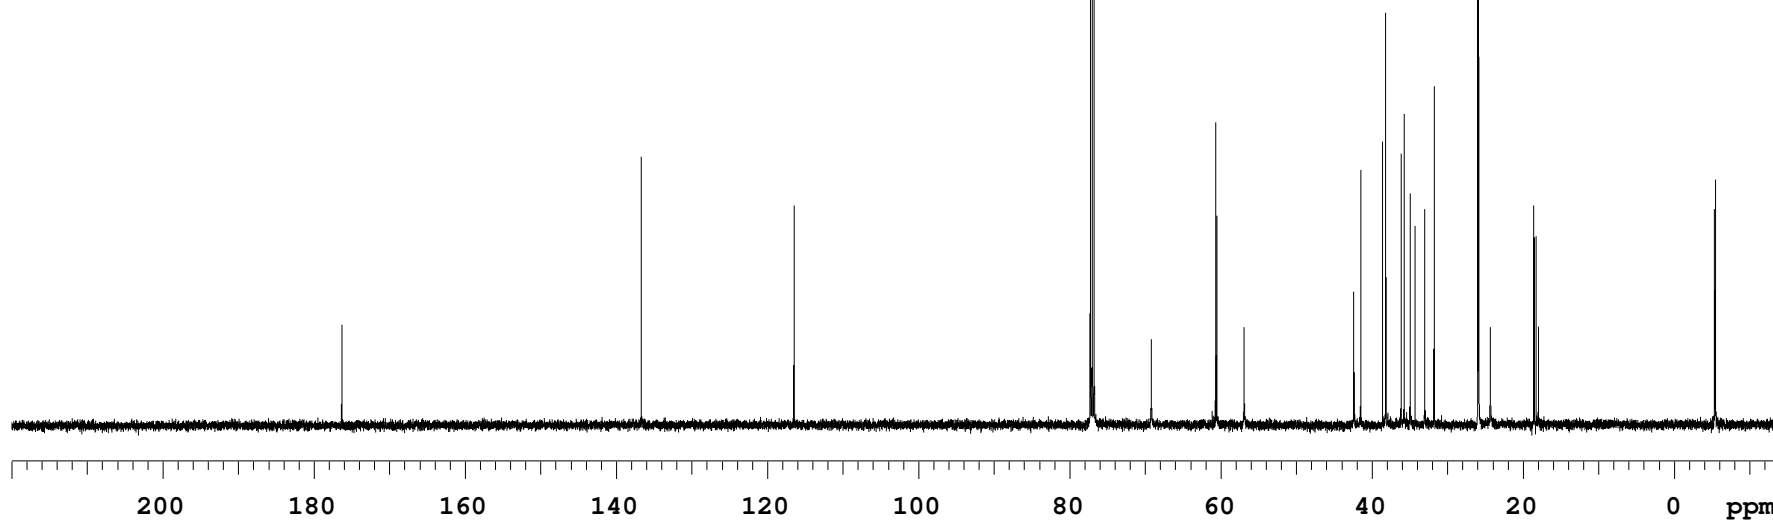

jtsy-vi-129 minor fxns 46-47

Sample Name:

jtsy-vi-129min46-47

Data Collected on:

indy.caltech.edu-inova500

Archive directory:

/home/yeomanjo/vnmrsys/data

Sample directory:

jtsy-vi-129min46-47

FidFile: PROTON01

Pulse Sequence: PROTON (s2pul)

Solvent: cdc13

Data collected on: Jun 29 2011

Sample #20, Operator: yeomanjo

Relax. delay 2.000 sec

Pulse 45.0 degrees

Acq. time 2.500 sec

Width 8000.0 Hz

32 repetitions

OBSERVE H1, 499.7290394 MHz

DATA PROCESSING

Line broadening 0.2 Hz

FT size 65536

Total time 2 min 24 sec

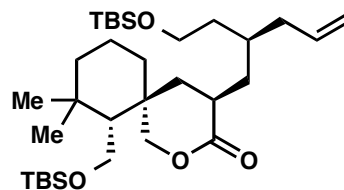

45

more polar diastereomer

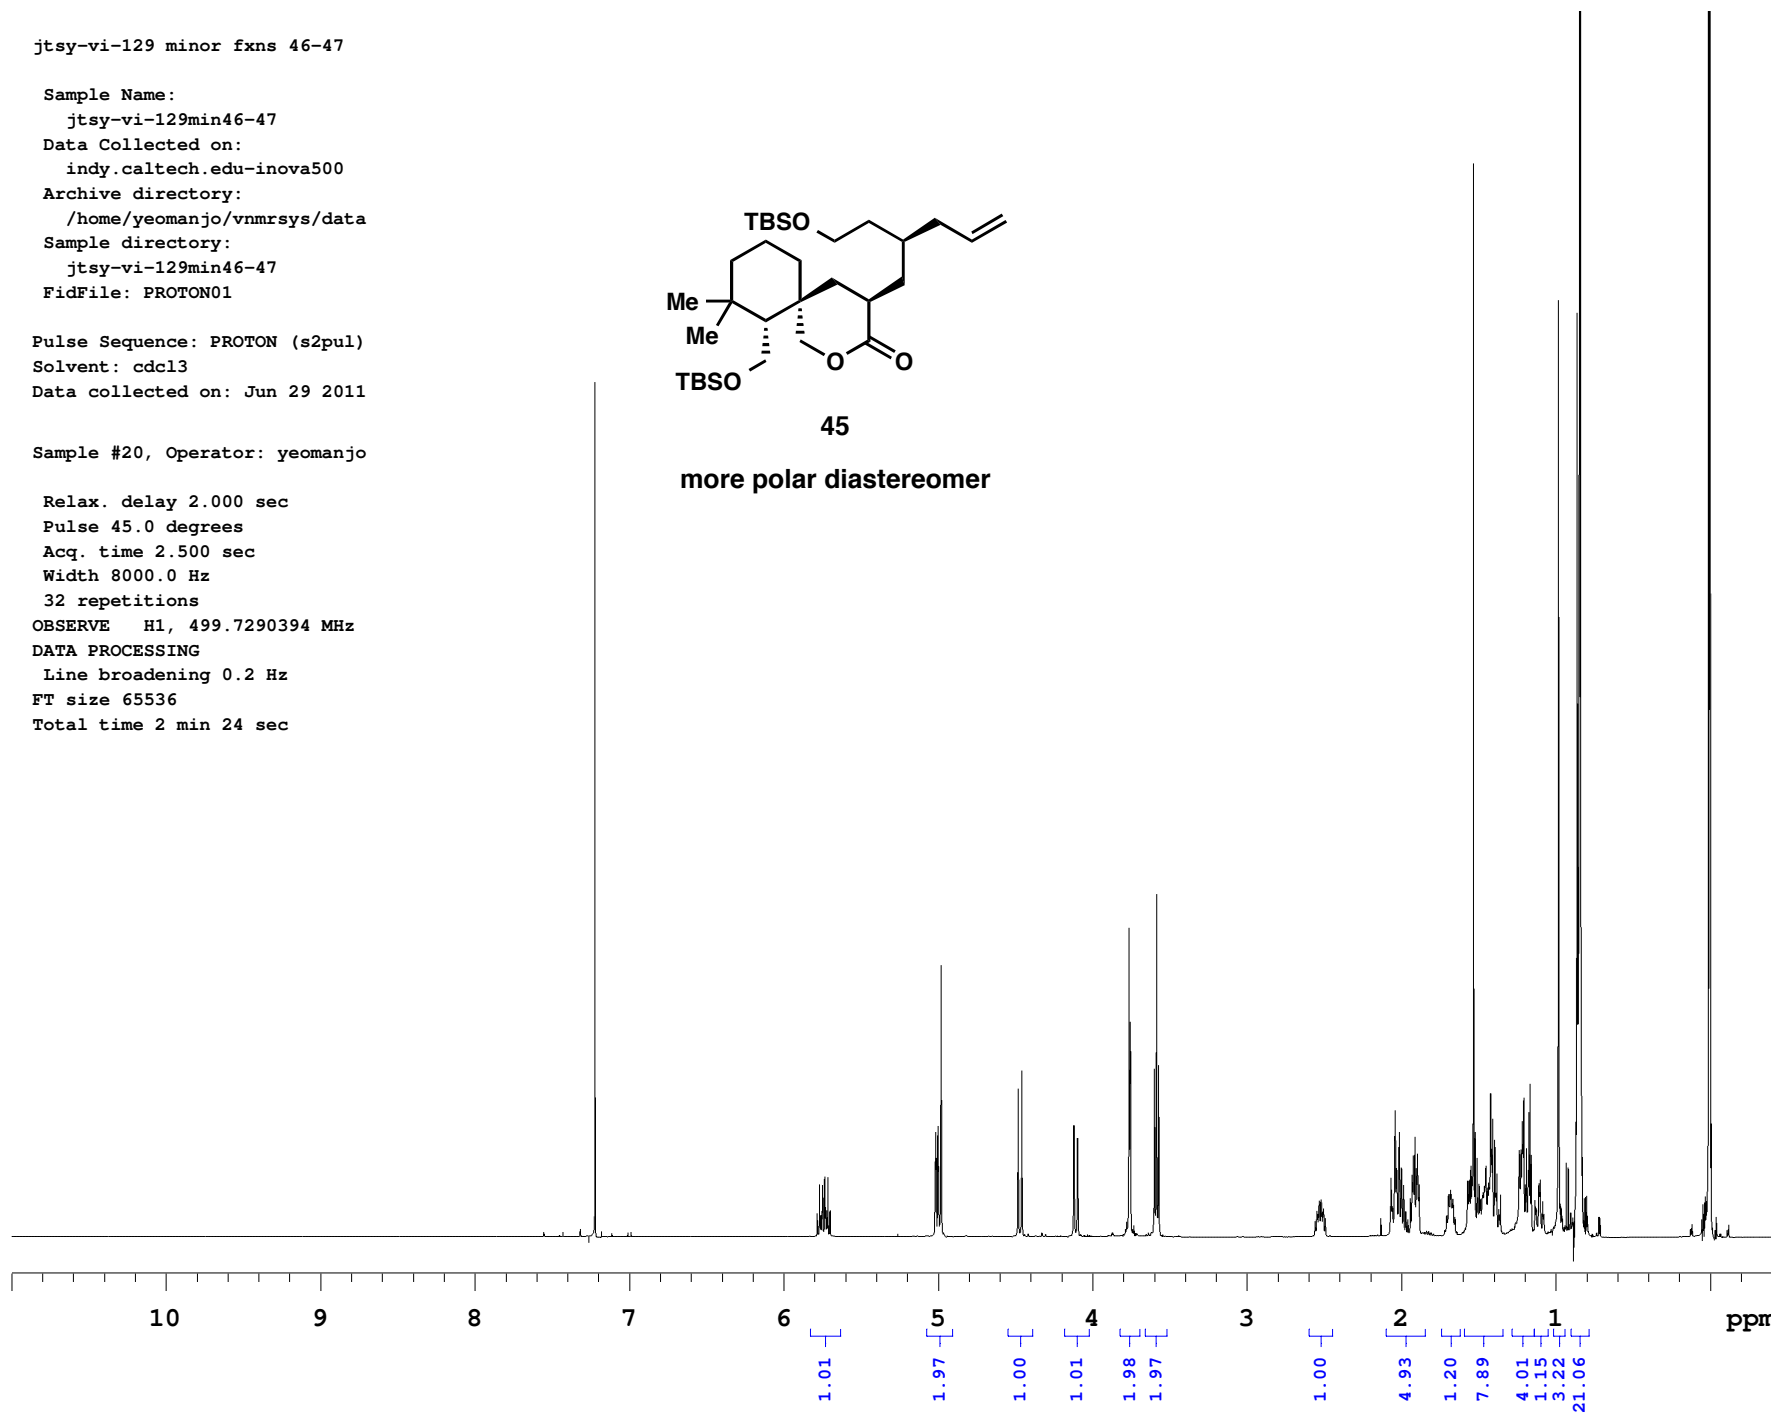

jtsy-vi-129 minor fxns 46-47

Sample Name:

jtsy-vi-129min46-47

Data Collected on:

indy.caltech.edu-inova500

Archive directory:

/home/yeomanjo/vnmrsys/data

Sample directory:

jtsy-vi-129min46-47

FidFile: CARBON01

Pulse Sequence: CARBON (s2pul)

Solvent: cdc13

Data collected on: Jun 29 2011

Sample #18, Operator: yeomanjo

Relax. delay 1.000 sec

Pulse 45.0 degrees

Acq. time 1.042 sec

Width 31446.5 Hz

3000 repetitions

OBSERVE C13, 125.6569623 MHz

DECOUPLE H1, 499.7315163 MHz

Power 39 dB

continuously on

WALTZ-16 modulated

DATA PROCESSING

Line broadening 0.5 Hz

FT size 65536

Total time 1 hr, 42 min

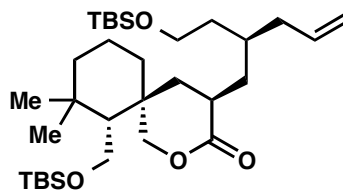

45

more polar diastereomer

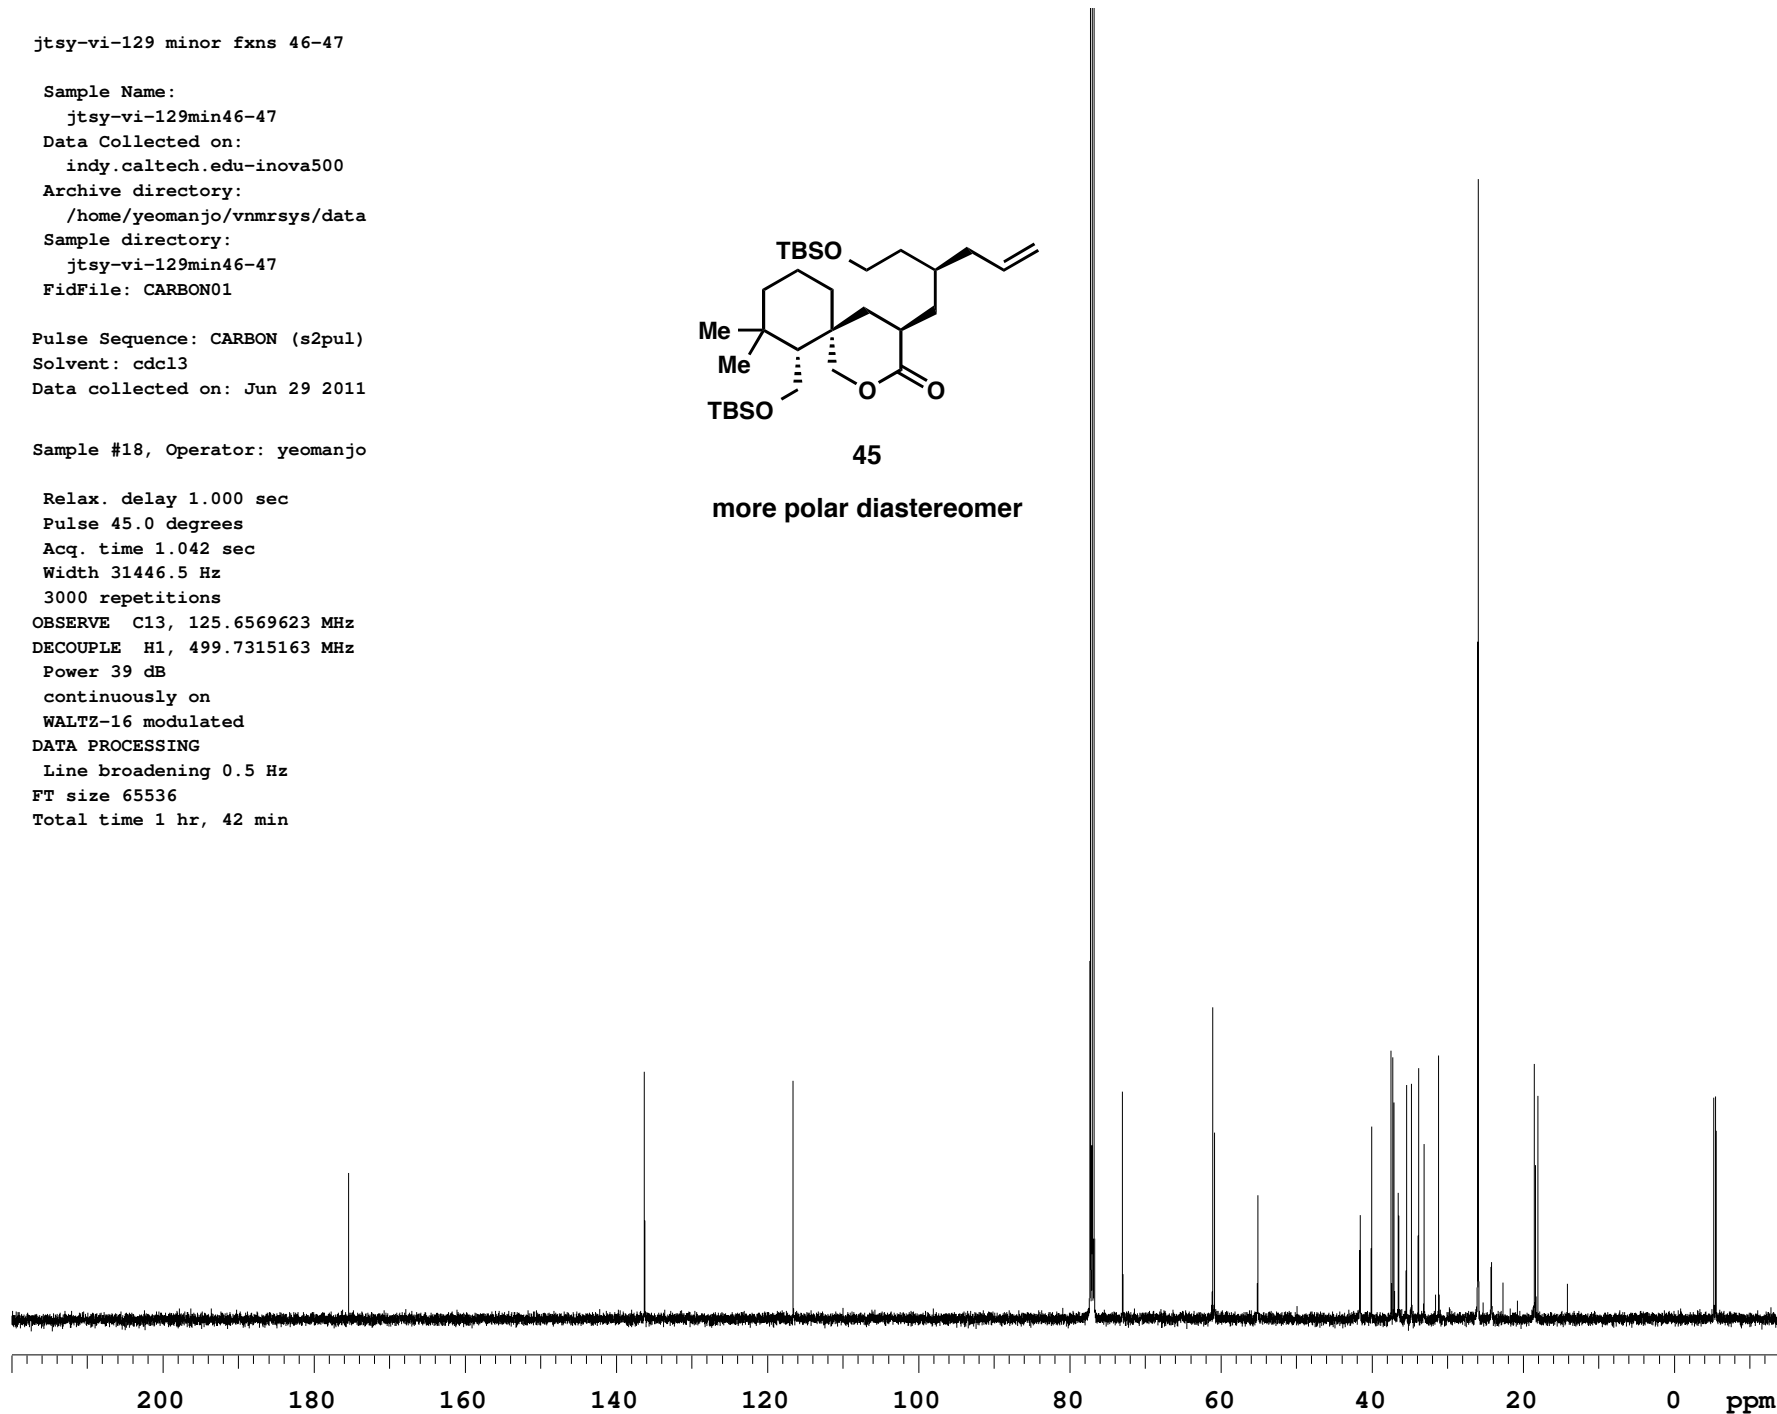

jc-1-288-A

Sample Name:

jc-1-288-A

Data Collected on:

indy.caltech.edu-inova500

Archive directory:

/home/jcha/vnmrsys/data

Sample directory:

jc-1-288-A

FidFile: PROTON01

Pulse Sequence: PROTON (s2pul)

Solvent: cdc13

Data collected on: Jun 16 2011

Temp. 25.0 C / 298.1 K

Sample #46, Operator: jcha

Relax. delay 2.000 sec

Pulse 45.0 degrees

Acq. time 2.500 sec

Width 8000.0 Hz

64 repetitions

OBSERVE H1, 499.7290200 MHz

DATA PROCESSING

Line broadening 0.2 Hz

FT size 65536

Total time 4 min 49 sec

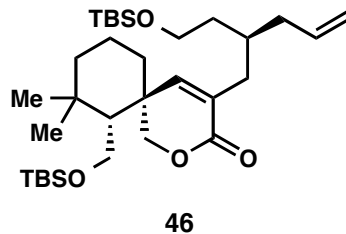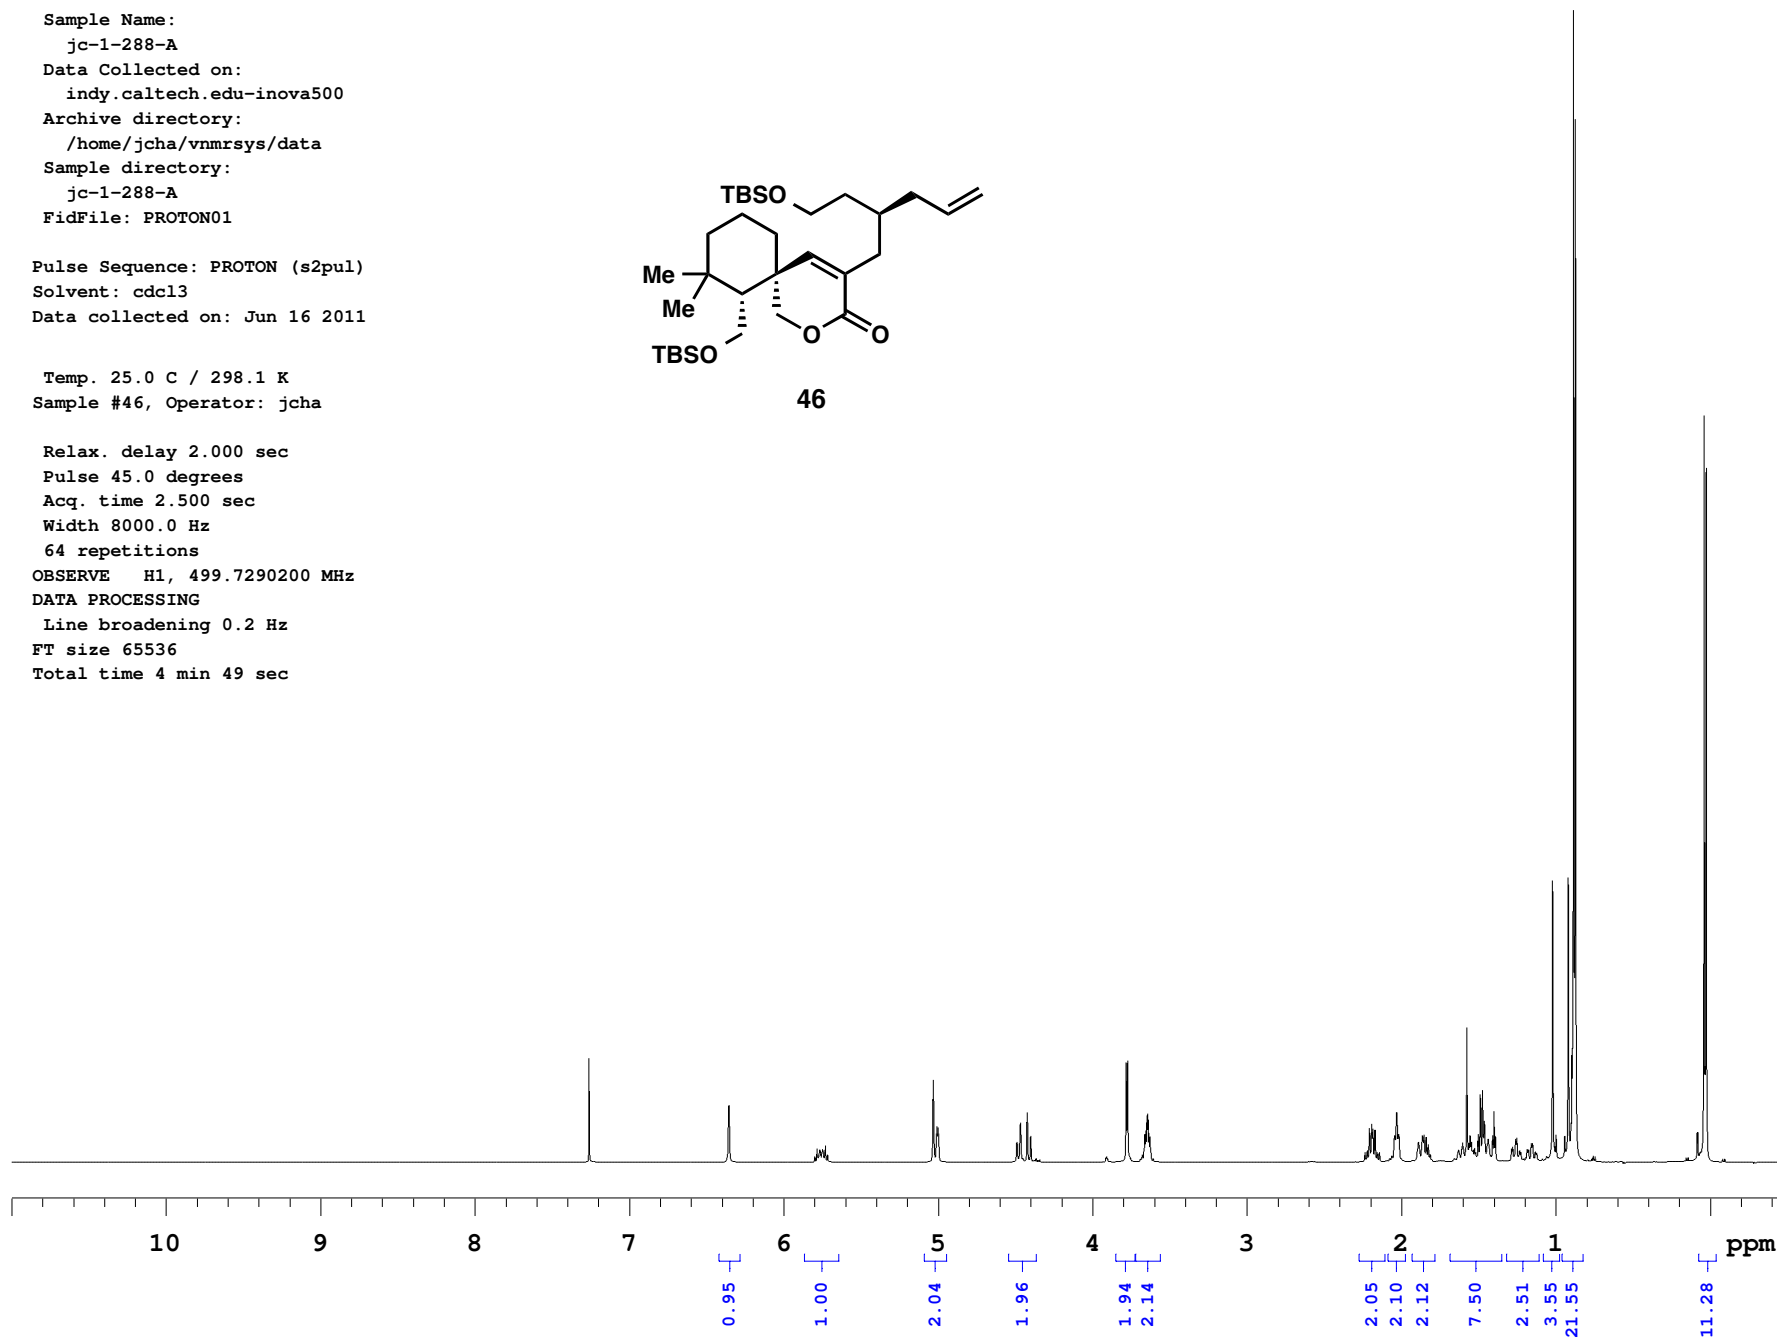



jc-1-288-A

Sample Name:

jc-1-288-A

Data Collected on:

indy.caltech.edu-inova500

Archive directory:

/home/jcha/vnmrsys/data

Sample directory:

jc-1-288-A

FidFile: CARBON01

Pulse Sequence: CARBON (s2pul)

Solvent: cdc13

Data collected on: Jun 16 2011

Temp. 25.0 C / 298.1 K

Sample #46, Operator: jcha

Relax. delay 1.000 sec

Pulse 45.0 degrees

Acq. time 1.042 sec

Width 31446.5 Hz

1000 repetitions

OBSERVE C13, 125.6569623 MHz

DECOUPLE H1, 499.7315163 MHz

Power 39 dB

continuously on

WALTZ-16 modulated

DATA PROCESSING

Line broadening 0.5 Hz

FT size 65536

Total time 34 min

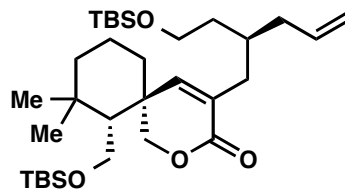

46

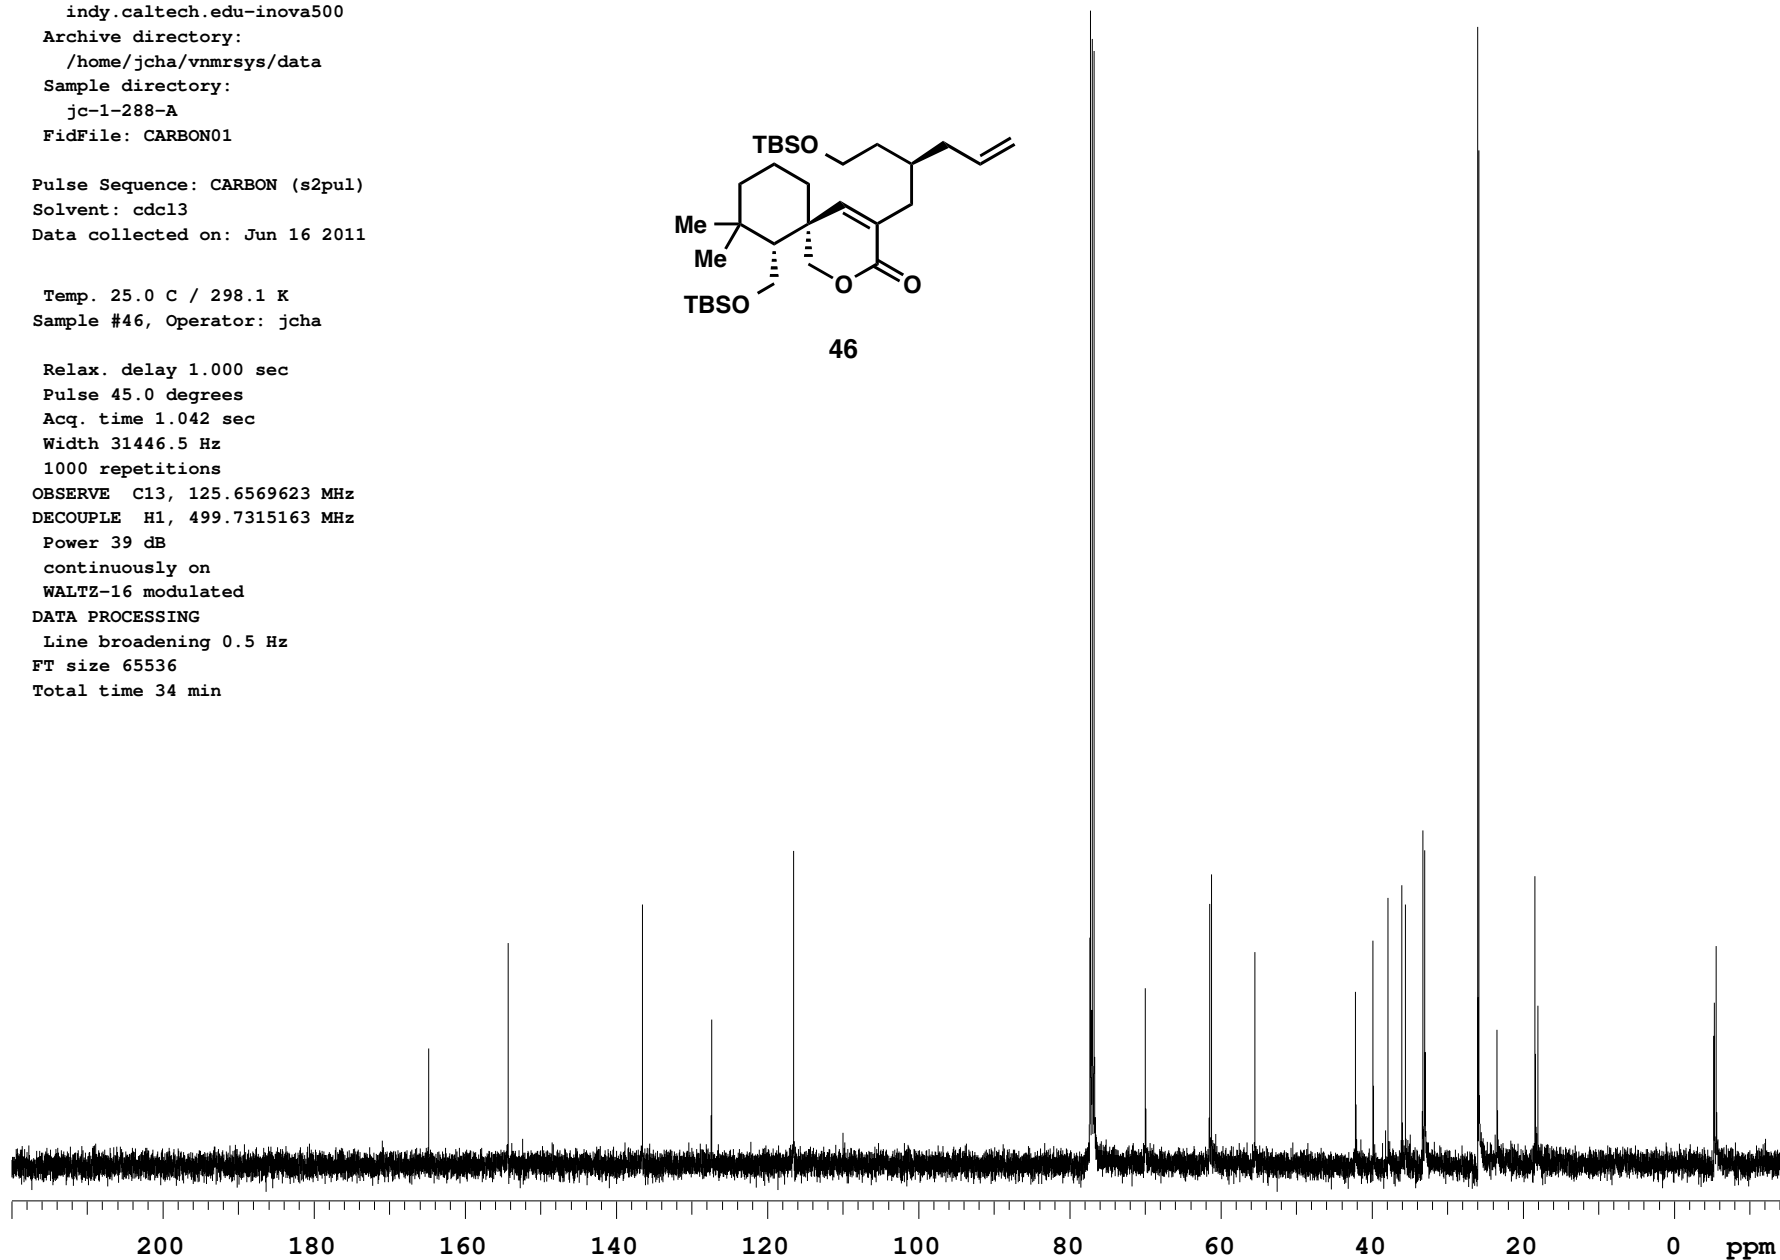

jc-1-272-A-char

Sample Name:

jc-1-272-A-char

Data Collected on:

indy.caltech.edu-inova500

Archive directory:

/home/jcha/vnmrsys/data

Sample directory:

jc-1-272-A-char

FidFile: PROTON01

Pulse Sequence: PROTON (s2pul)

Solvent: cdcl3

Data collected on: Jun 2 2011

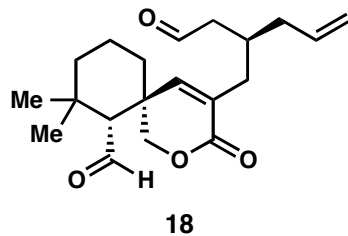

Temp. 25.0 C / 298.1 K

Sample #2, Operator: jcha

Relax. delay 2.000 sec

Pulse 45.0 degrees

Acq. time 2.500 sec

Width 8000.0 Hz

64 repetitions

OBSERVE H1, 499.7290203 MHz

DATA PROCESSING

Line broadening 0.2 Hz

FT size 65536

Total time 4 min 49 sec

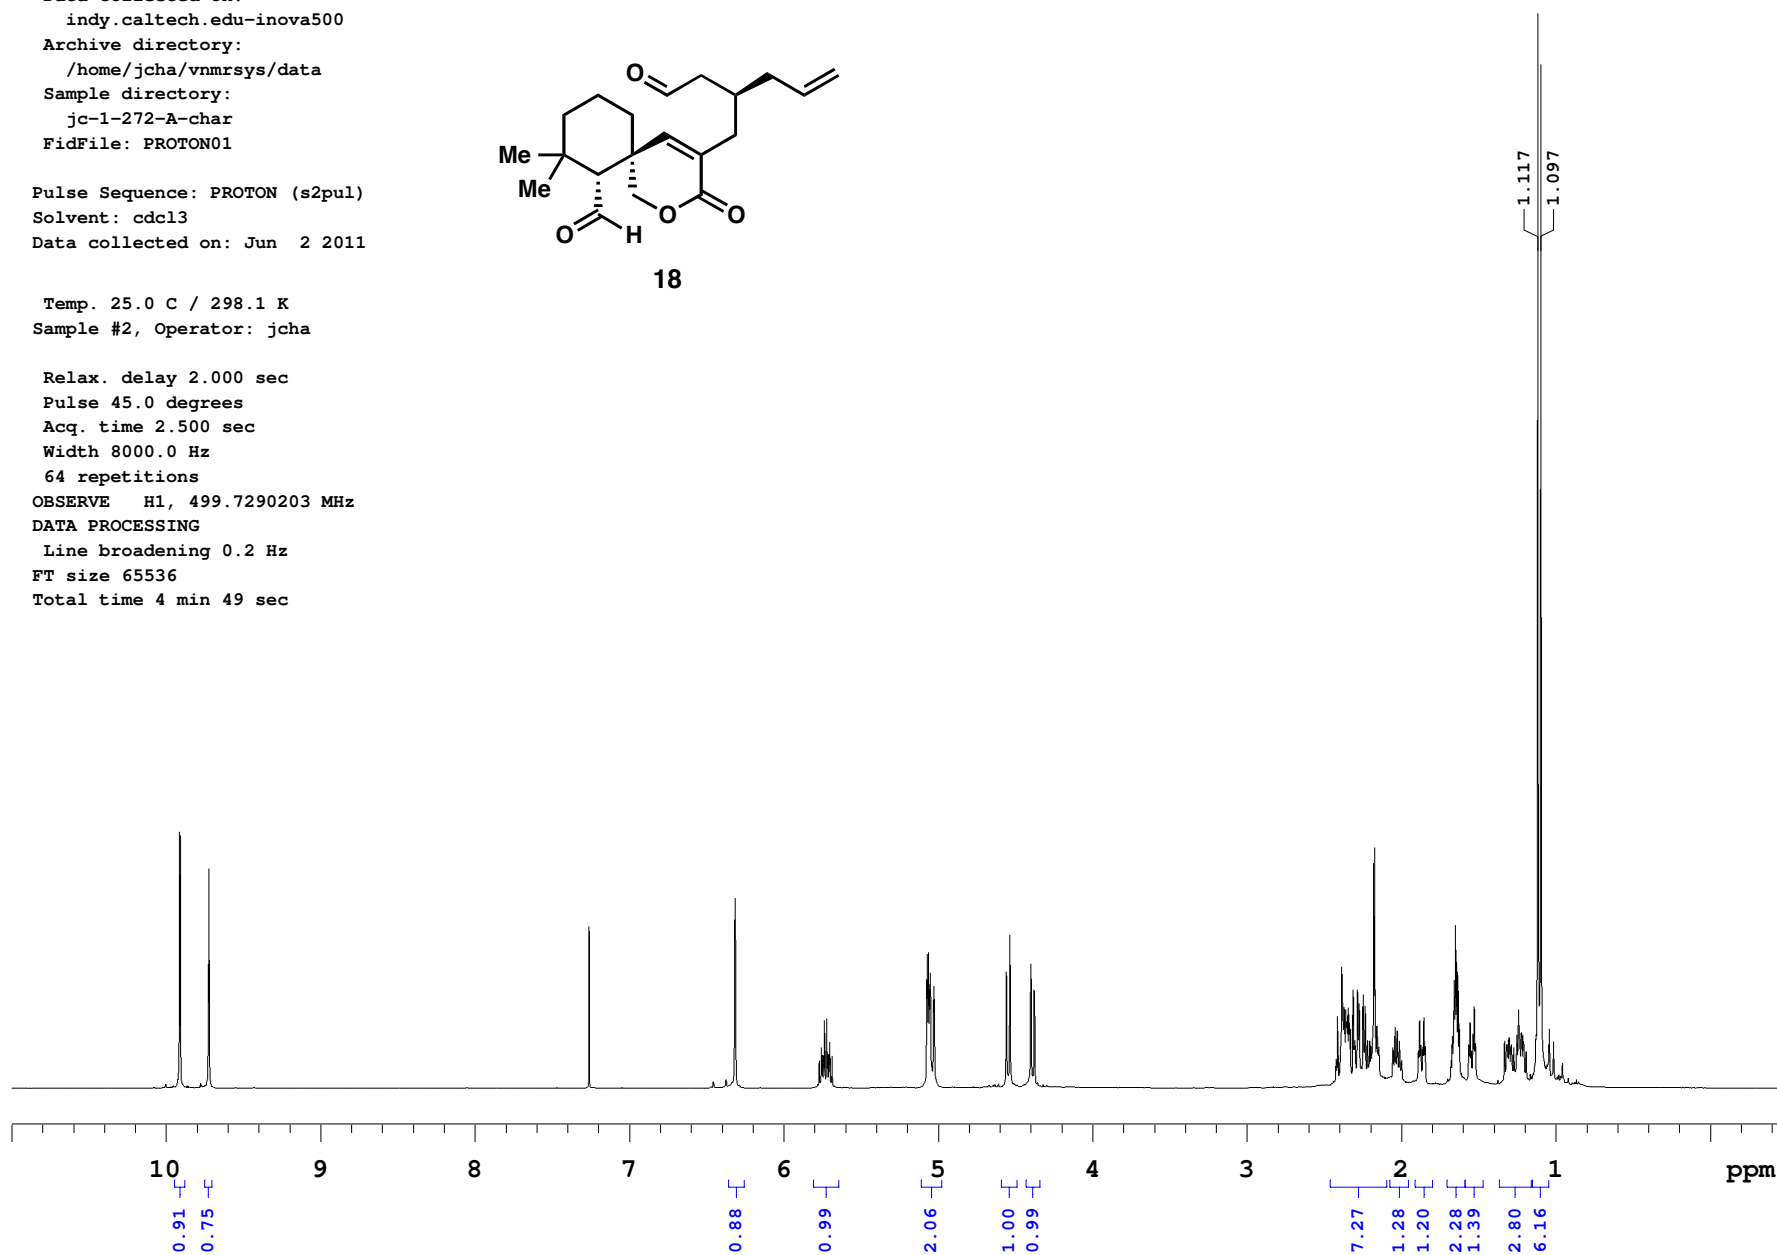

jc-1-272-A-char

Sample Name:

jc-1-272-A-char

Data Collected on:

indy.caltech.edu-inova500

Archive directory:

/home/jcha/vnmrsys/data

Sample directory:

jc-1-272-A-char

FidFile: CARBON01

Pulse Sequence: CARBON (s2pul)

Solvent: cdc13

Data collected on: Jun 2 2011

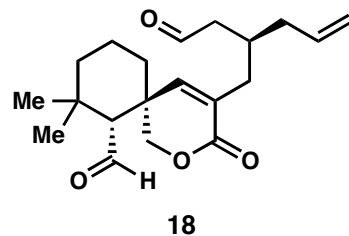

Temp. 25.0 C / 298.1 K

Sample #2, Operator: jcha

Relax. delay 1.000 sec

Pulse 45.0 degrees

Acq. time 1.042 sec

Width 31446.5 Hz

512 repetitions

OBSERVE C13, 125.6569642 MHz

DECOUPLE H1, 499.7315163 MHz

Power 39 dB

continuously on

WALTZ-16 modulated

DATA PROCESSING

Line broadening 0.5 Hz

FT size 65536

Total time 17 min

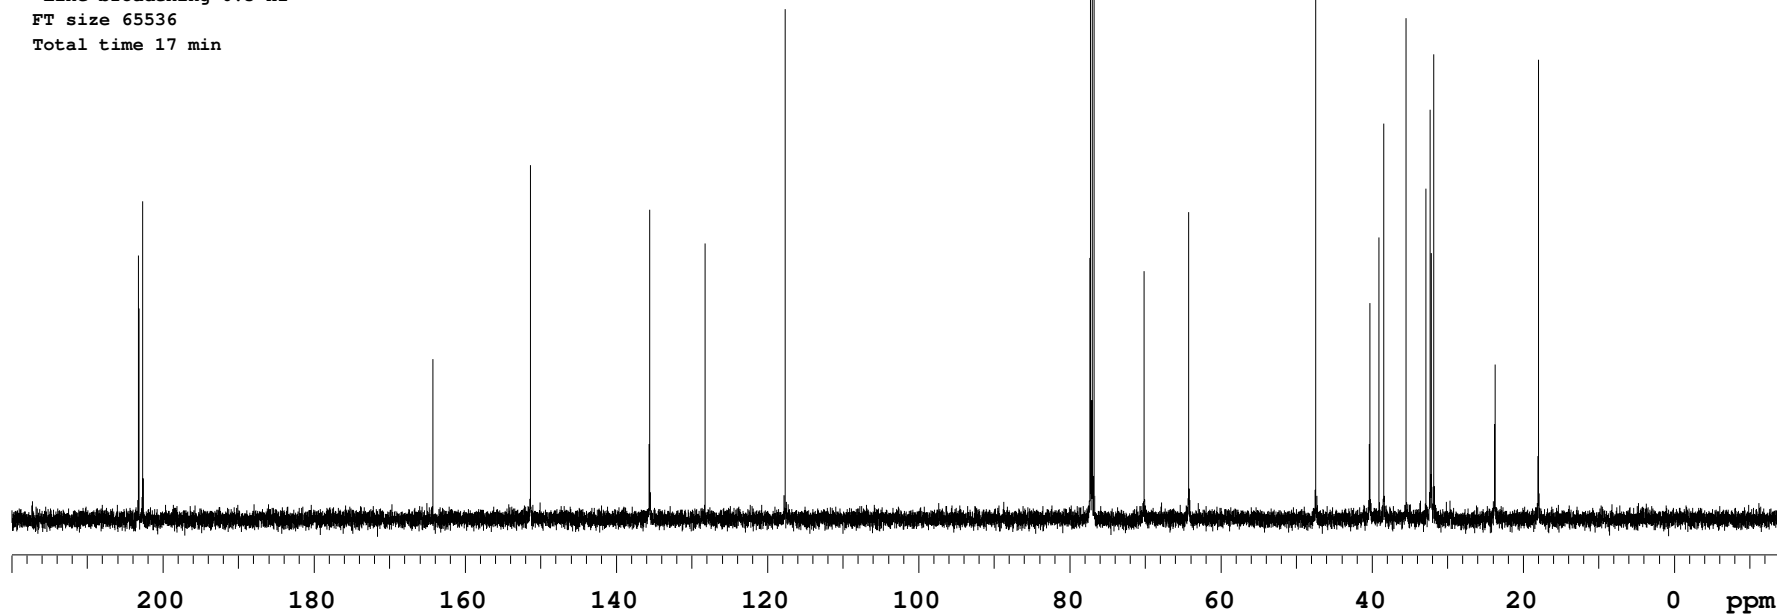

jtsy-vi-163pHPLC

Sample Name:

jtsy-vi-163pHPLC

Data Collected on:

indy.caltech.edu-inova500

Archive directory:

/home/yeomanjo/vnmrsys/data

Sample directory:

jtsy-vi-163pHPLC

FidFile: PROTON01

Pulse Sequence: PROTON (s2pul)

Solvent: cdcl3

Data collected on: Jul 1 2011

Sample #14, Operator: yeomanjo

Relax. delay 2.000 sec

Pulse 45.0 degrees

Acq. time 2.500 sec

Width 8000.0 Hz

32 repetitions

OBSERVE H1, 499.7290166 MHz

DATA PROCESSING

Line broadening 0.2 Hz

FT size 65536

Total time 2 min 24 sec

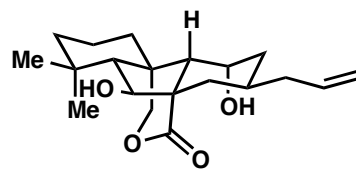

16

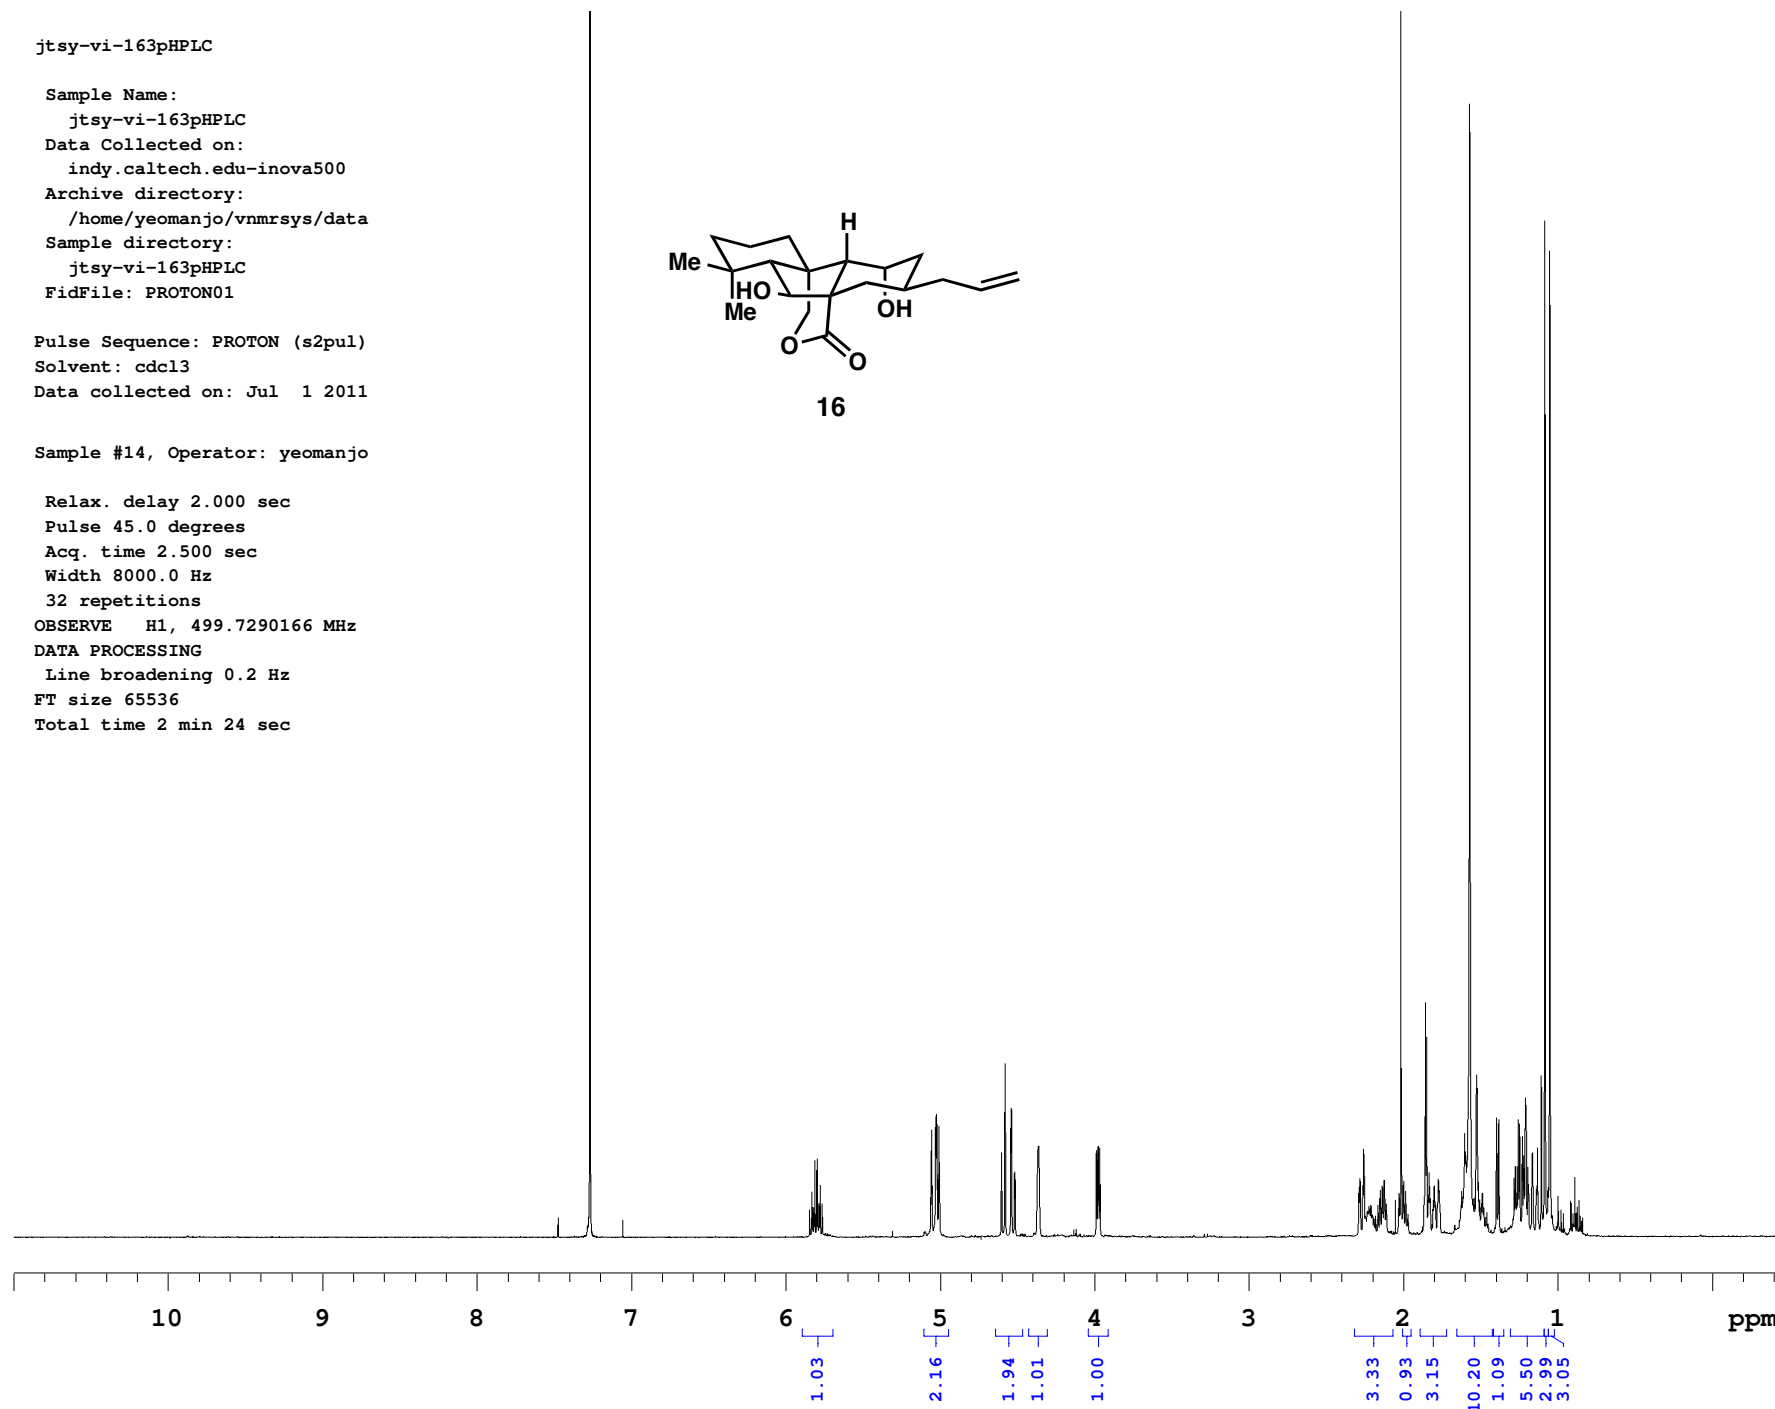

jtsy-vi-163

Sample Name:

jtsy-vi-163pHPLC

Data Collected on:

indy.caltech.edu-inova500

Archive directory:

/home/yeomanjo/vnmrsys/data

Sample directory:

jtsy-vi-163pHPLC

FidFile: CARBON01

Pulse Sequence: CARBON (s2pul)

Solvent: cdc13

Data collected on: Jul 1 2011

Sample #14, Operator: yeomanjo

Relax. delay 1.000 sec

Pulse 45.0 degrees

Acq. time 1.042 sec

Width 31446.5 Hz

6000 repetitions

OBSERVE C13, 125.6569623 MHz

DECOUPLE H1, 499.7315163 MHz

Power 39 dB

continuously on

WALTZ-16 modulated

DATA PROCESSING

Line broadening 0.5 Hz

FT size 65536

Total time 3 hr, 25 min

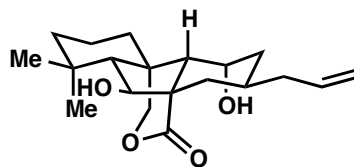

16

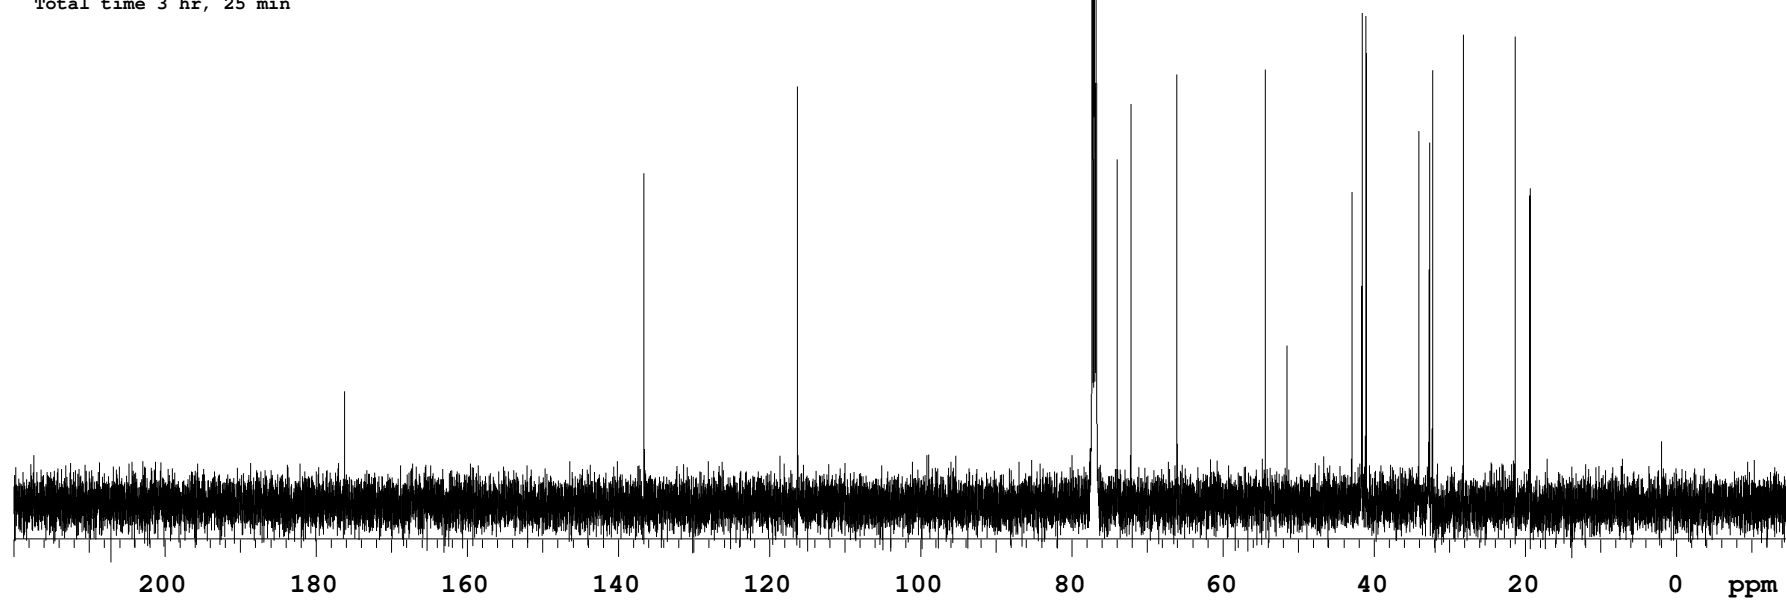

COSY of

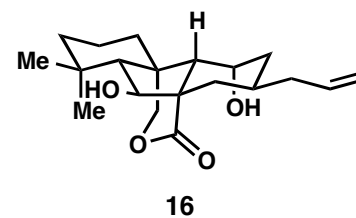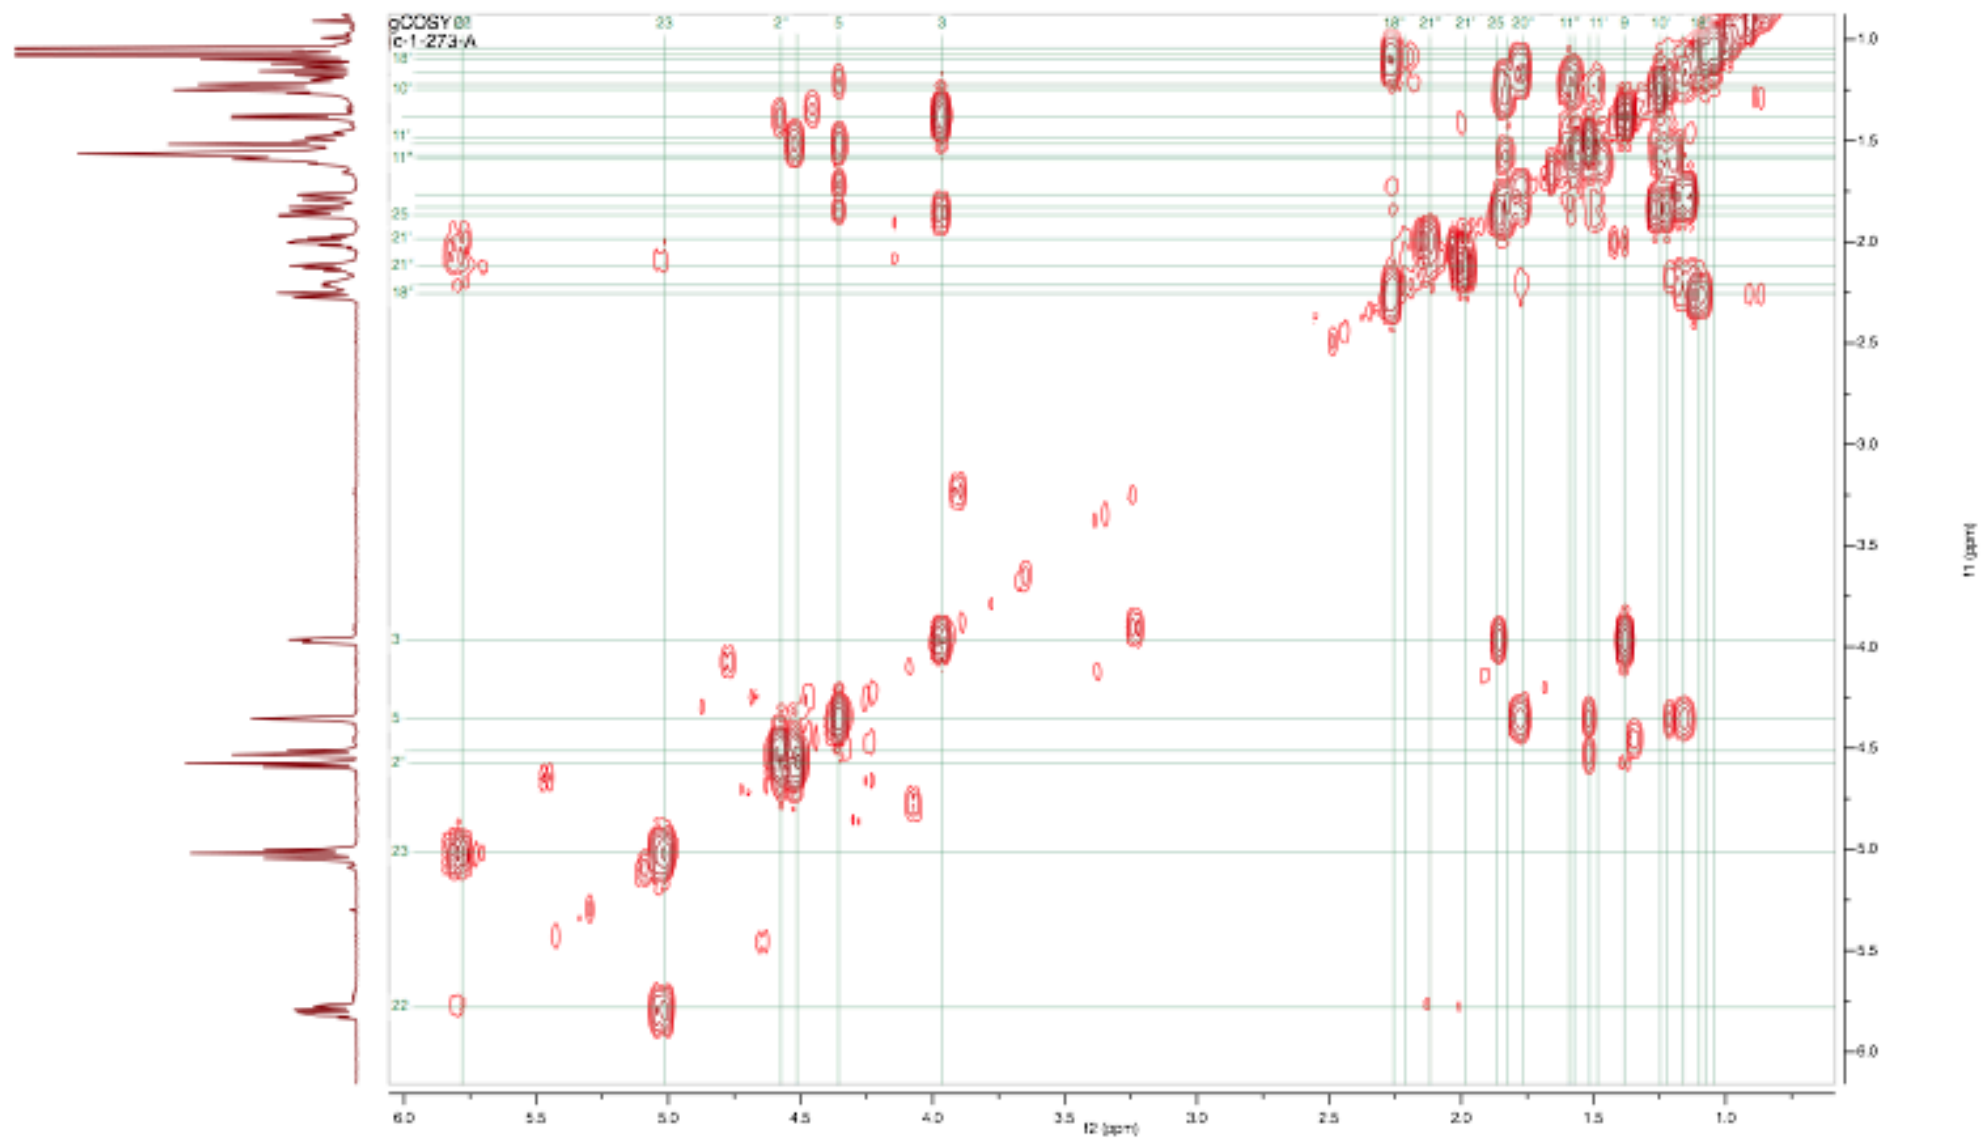

HSQC of

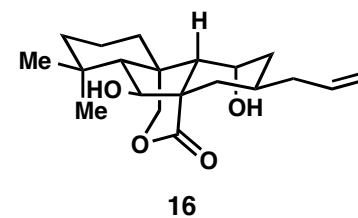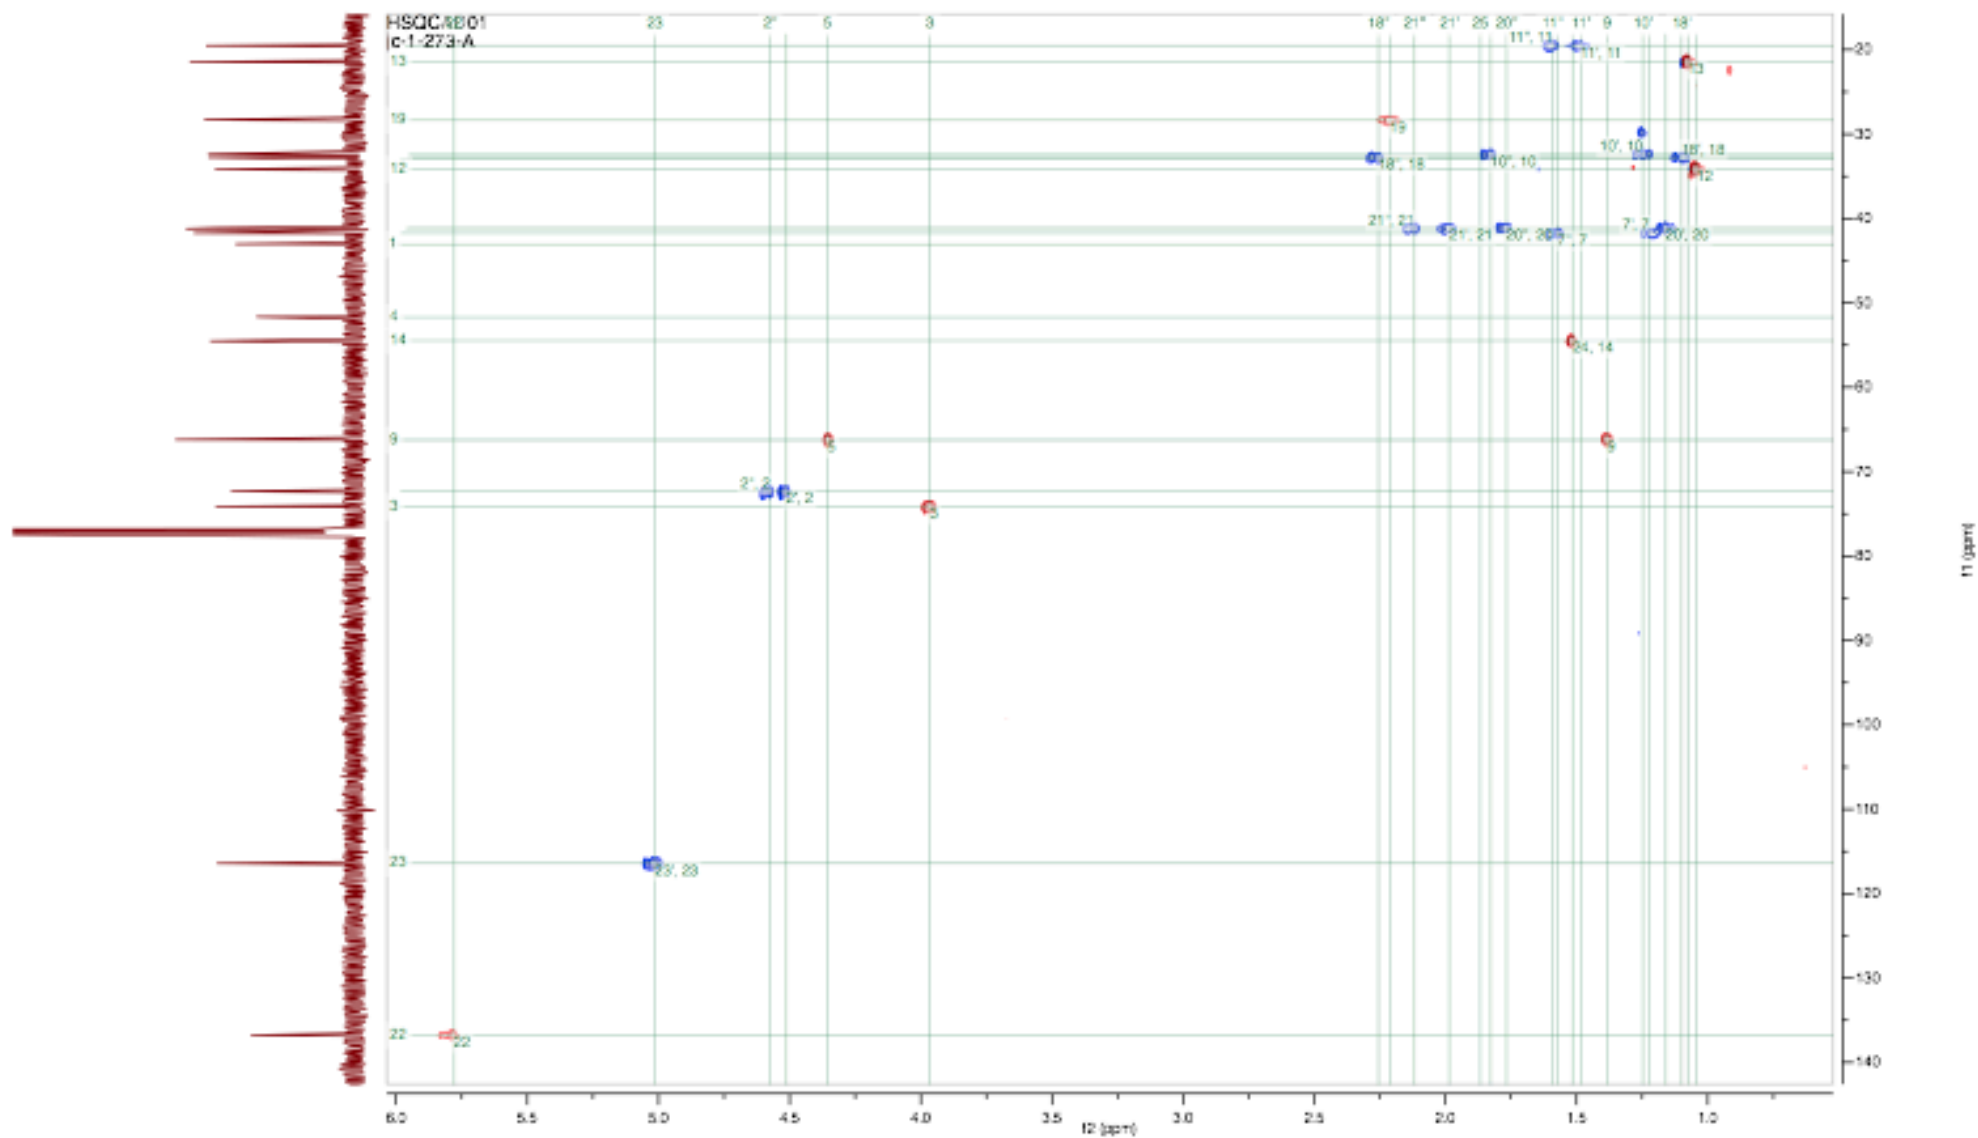

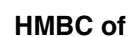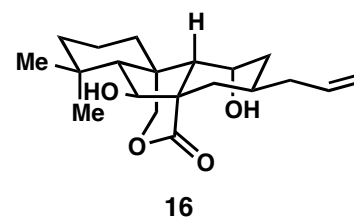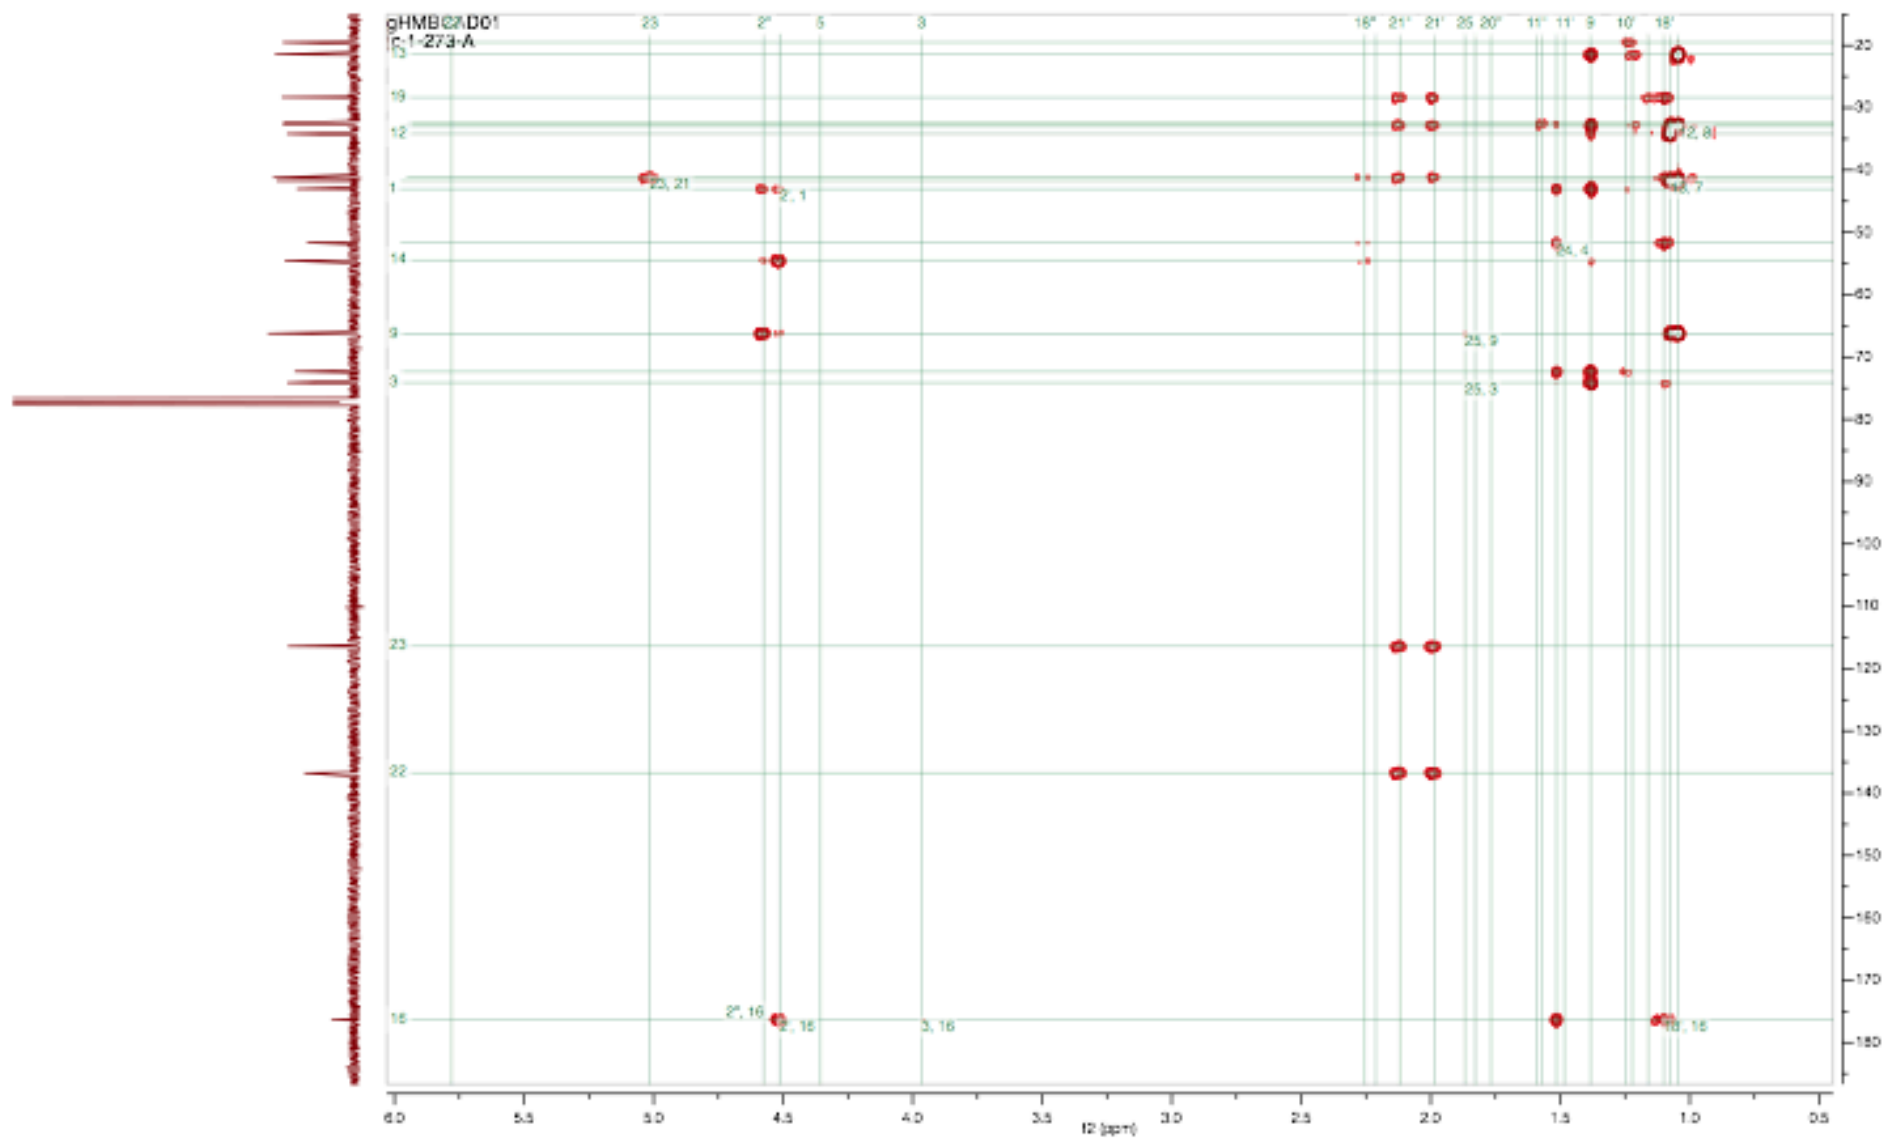



NOESY of

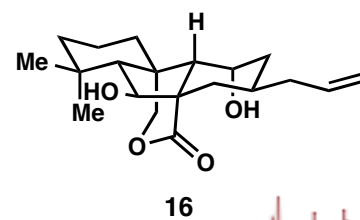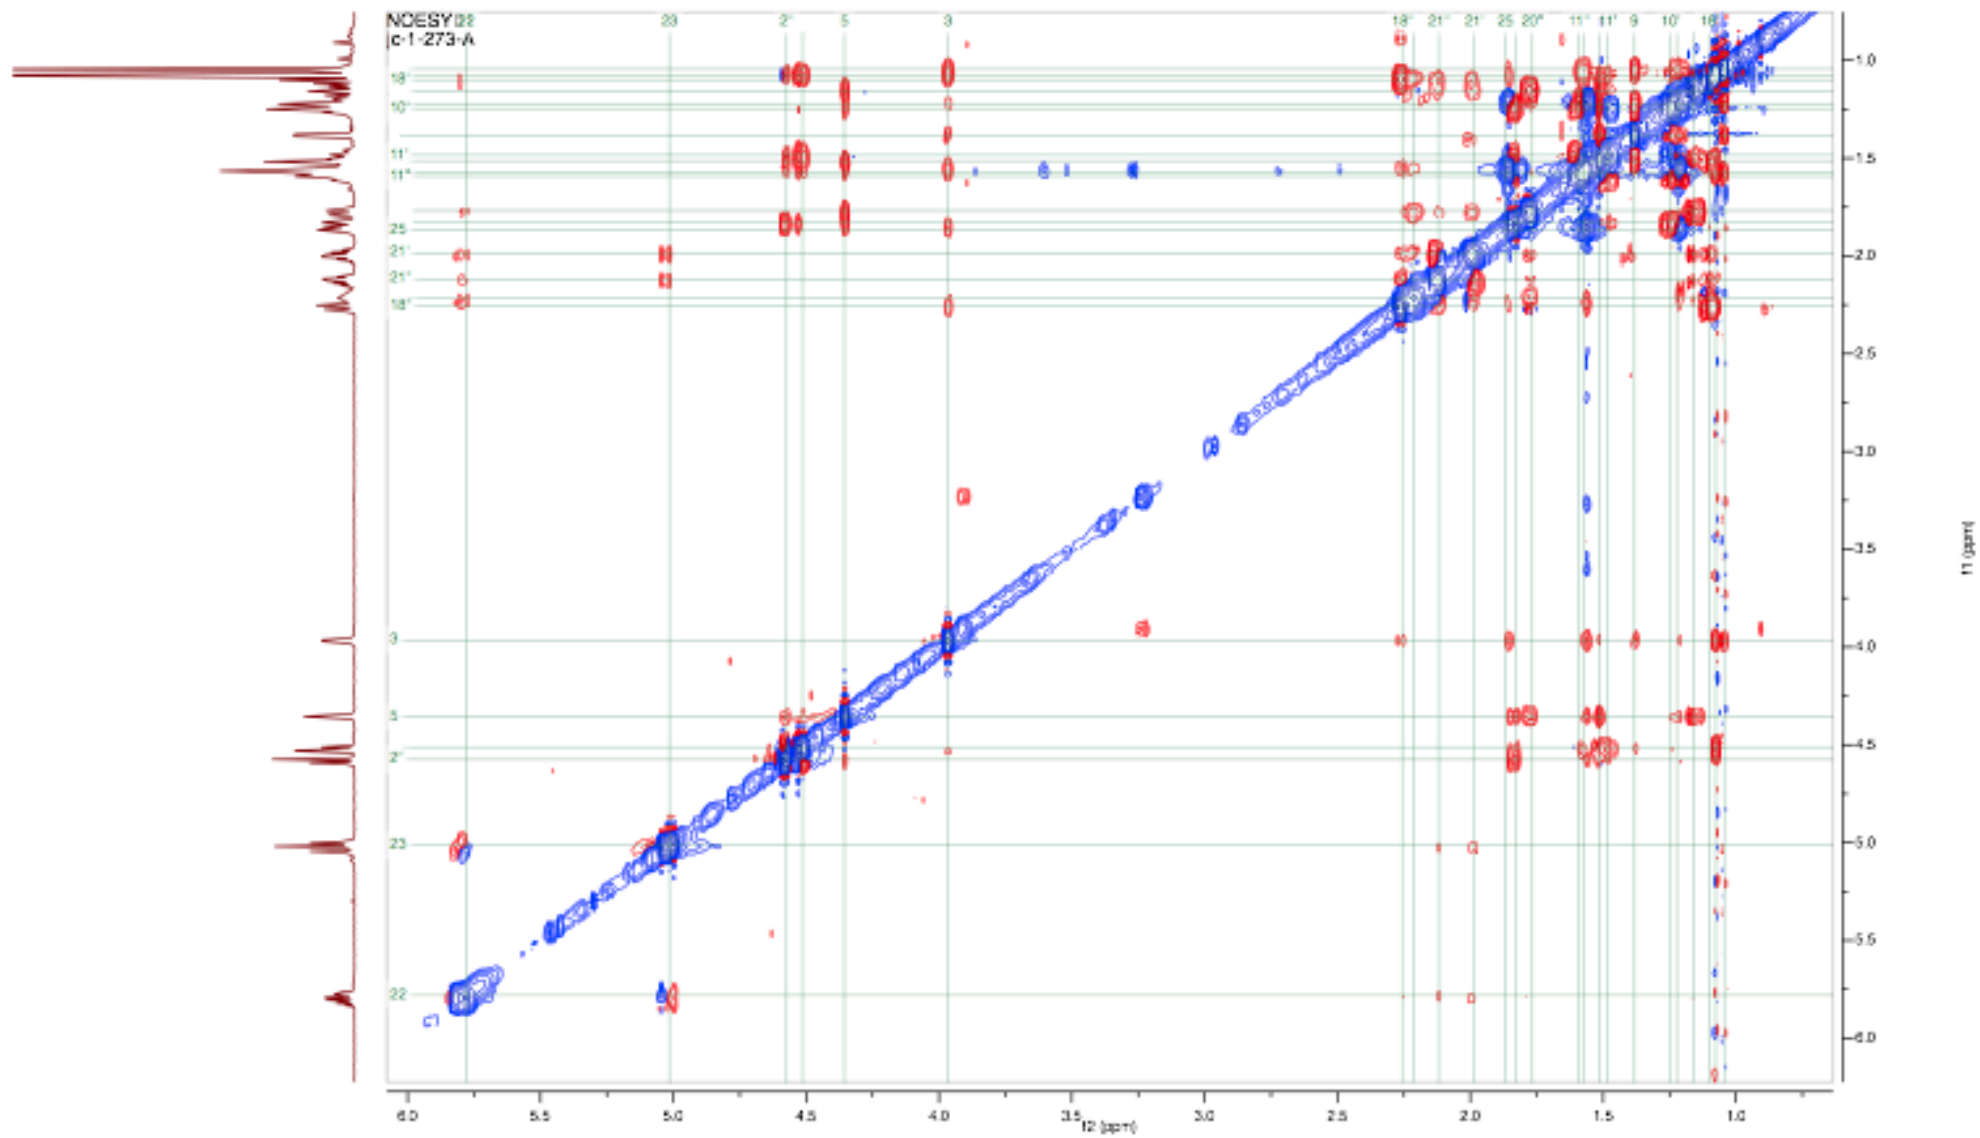

jc-1-274-A

Sample Name:

jc-1-274-A

Data Collected on:

indy.caltech.edu-inova500

Archive directory:

/home/jcha/vnmrsys/data

Sample directory:

jc-1-274-A

FidFile: current

Pulse Sequence: PROTON (s2pul)

Solvent: cdcl3

Data collected on: Jul 20 2011

Sample #2, Operator: jcha

Relax. delay 2.000 sec

Pulse 45.0 degrees

Acq. time 2.500 sec

Width 8000.0 Hz

32 repetitions

OBSERVE H1, 499.7225125 MHz

DATA PROCESSING

Line broadening 0.2 Hz

FT size 65536

Total time 4 min 49 sec

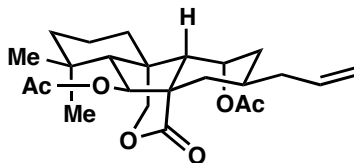

50

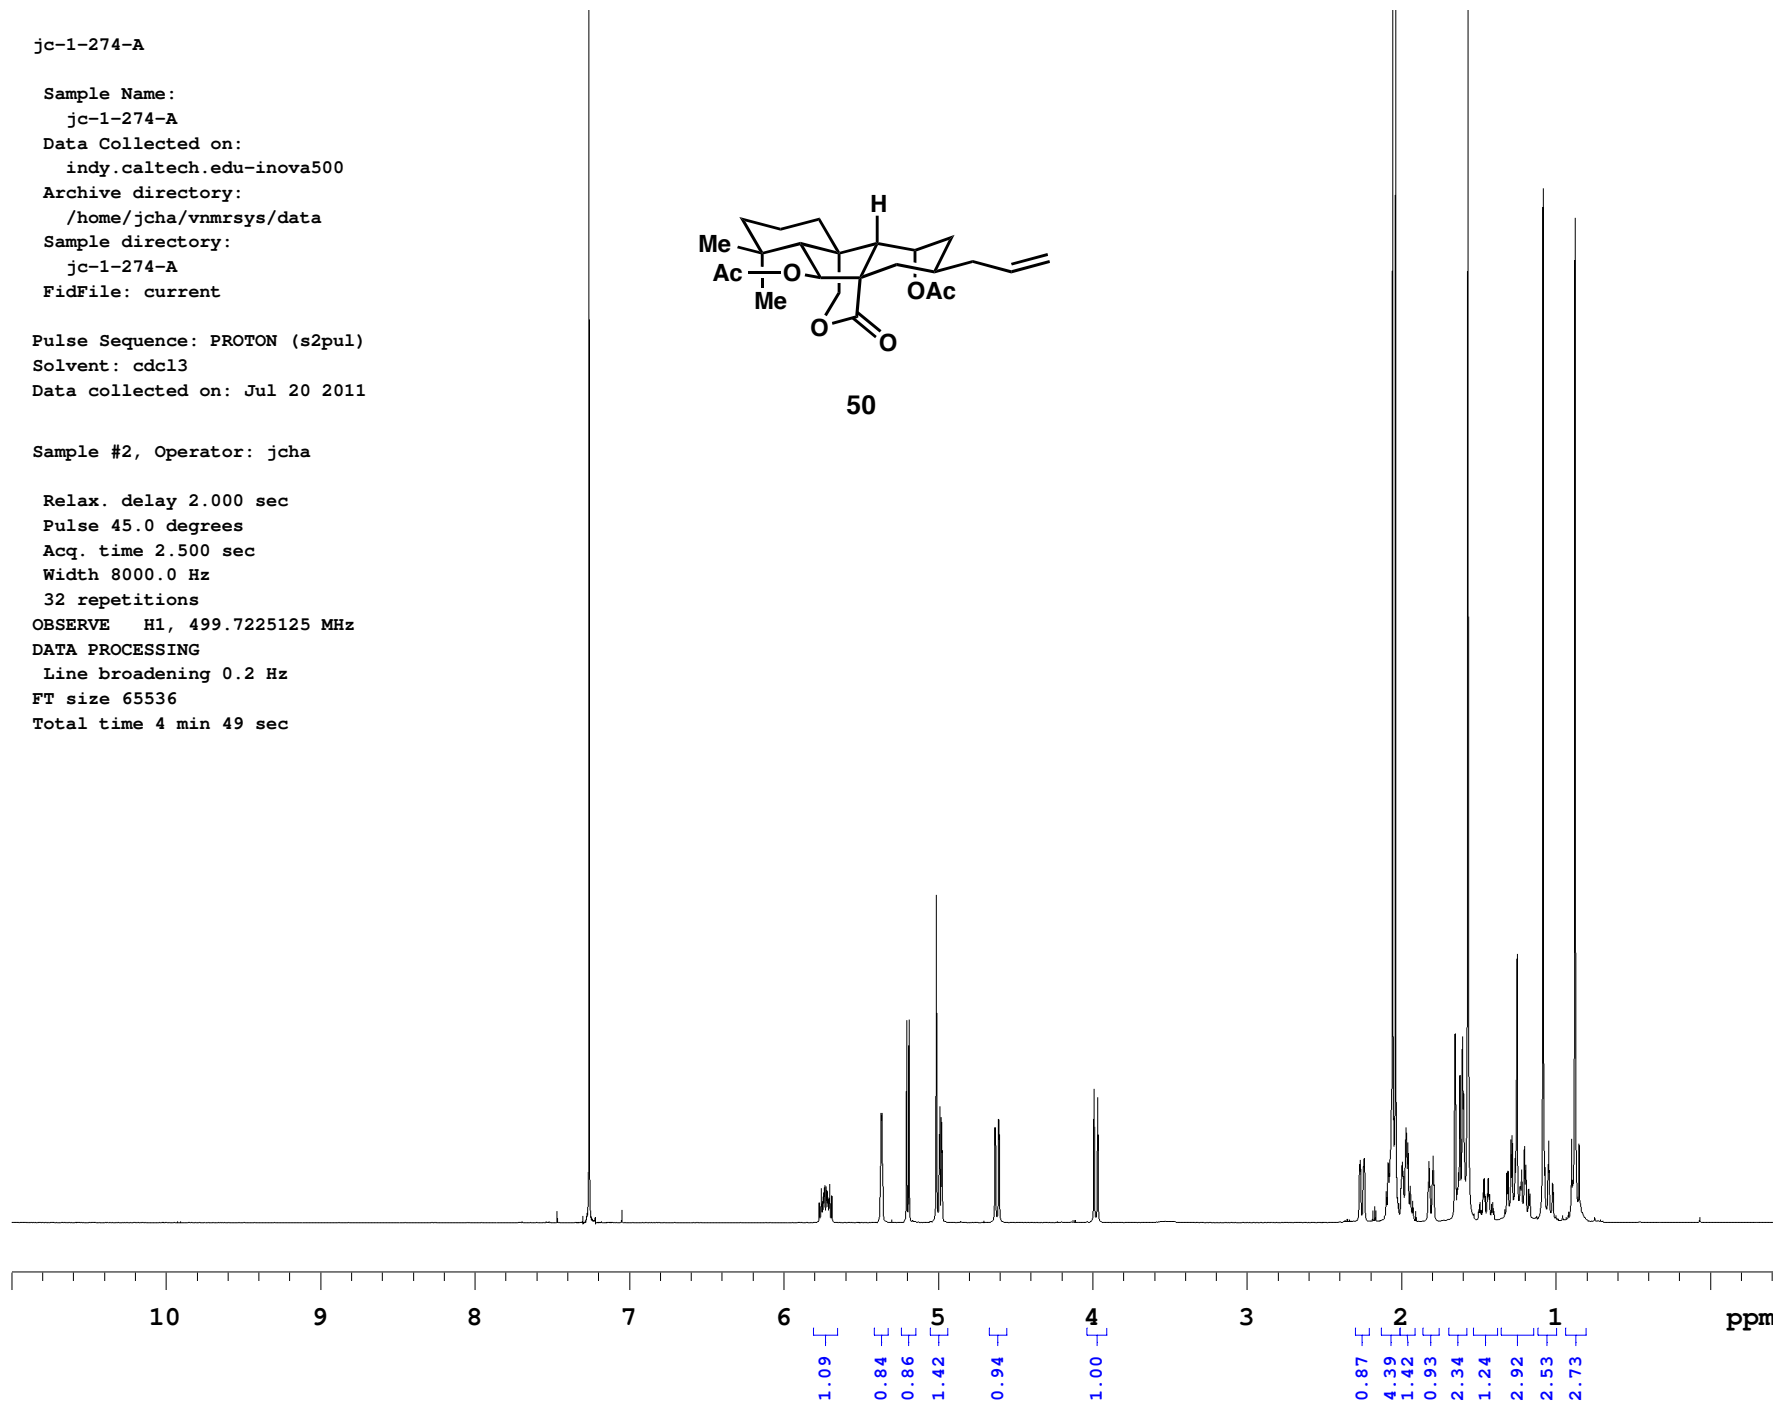

jc-1-274-A

Sample Name:

jc-1-274-A

Data Collected on:

indy.caltech.edu-inova500

Archive directory:

/home/jcha/vnmrsys/data

Sample directory:

jc-1-274-A

FidFile: CARBON01

Pulse Sequence: CARBON (s2pul)

Solvent: cdc13

Data collected on: Jul 18 2011

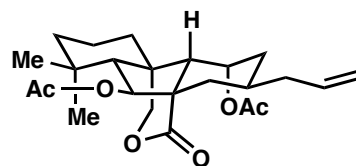

50

Sample #46, Operator: jcha

Relax. delay 1.000 sec

Pulse 45.0 degrees

Acq. time 1.042 sec

Width 31446.5 Hz

1725 repetitions

OBSERVE C13, 125.6553262 MHz

DECOUPLE H1, 499.7250019 MHz

Power 39 dB

continuously on

WALTZ-16 modulated

DATA PROCESSING

Line broadening 0.5 Hz

FT size 65536

Total time 58 min

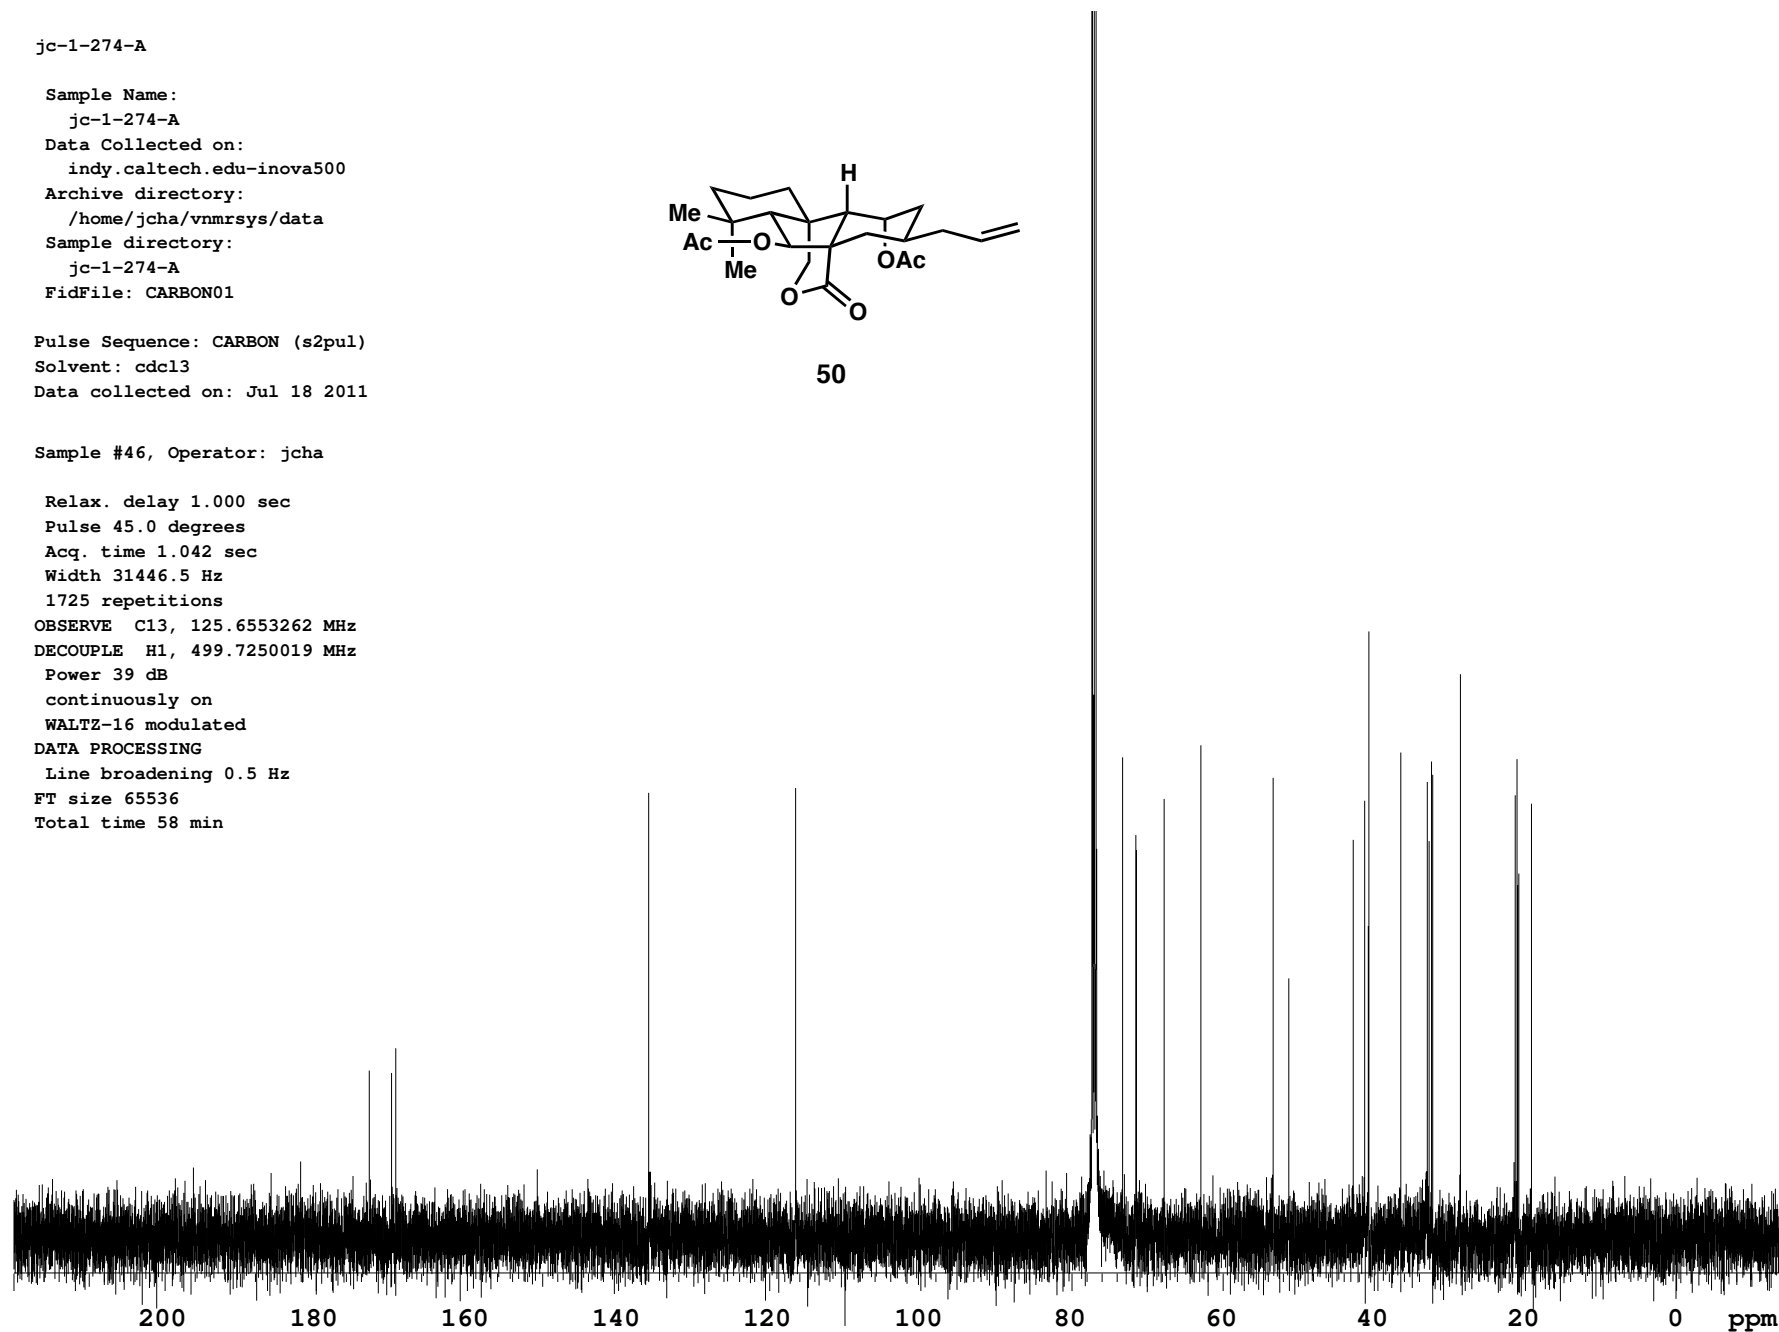

jc-1-274-B

Sample Name:

jc-1-274-B

Data Collected on:

indy.caltech.edu-inova500

Archive directory:

/home/jcha/vnmrsys/data

Sample directory:

jc-1-274-B

FidFile: PROTON03

Pulse Sequence: PROTON (s2pul)

Solvent: cdcl3

Data collected on: Jul 26 2011

Sample #1, Operator: jcha

Relax. delay 1.000 sec

Pulse 45.0 degrees

Acq. time 2.500 sec

Width 8000.0 Hz

64 repetitions

OBSERVE H1, 499.7225125 MHz

DATA PROCESSING

Line broadening 0.2 Hz

FT size 65536

Total time 3 min 45 sec

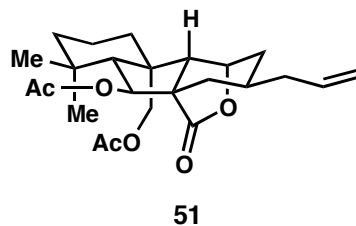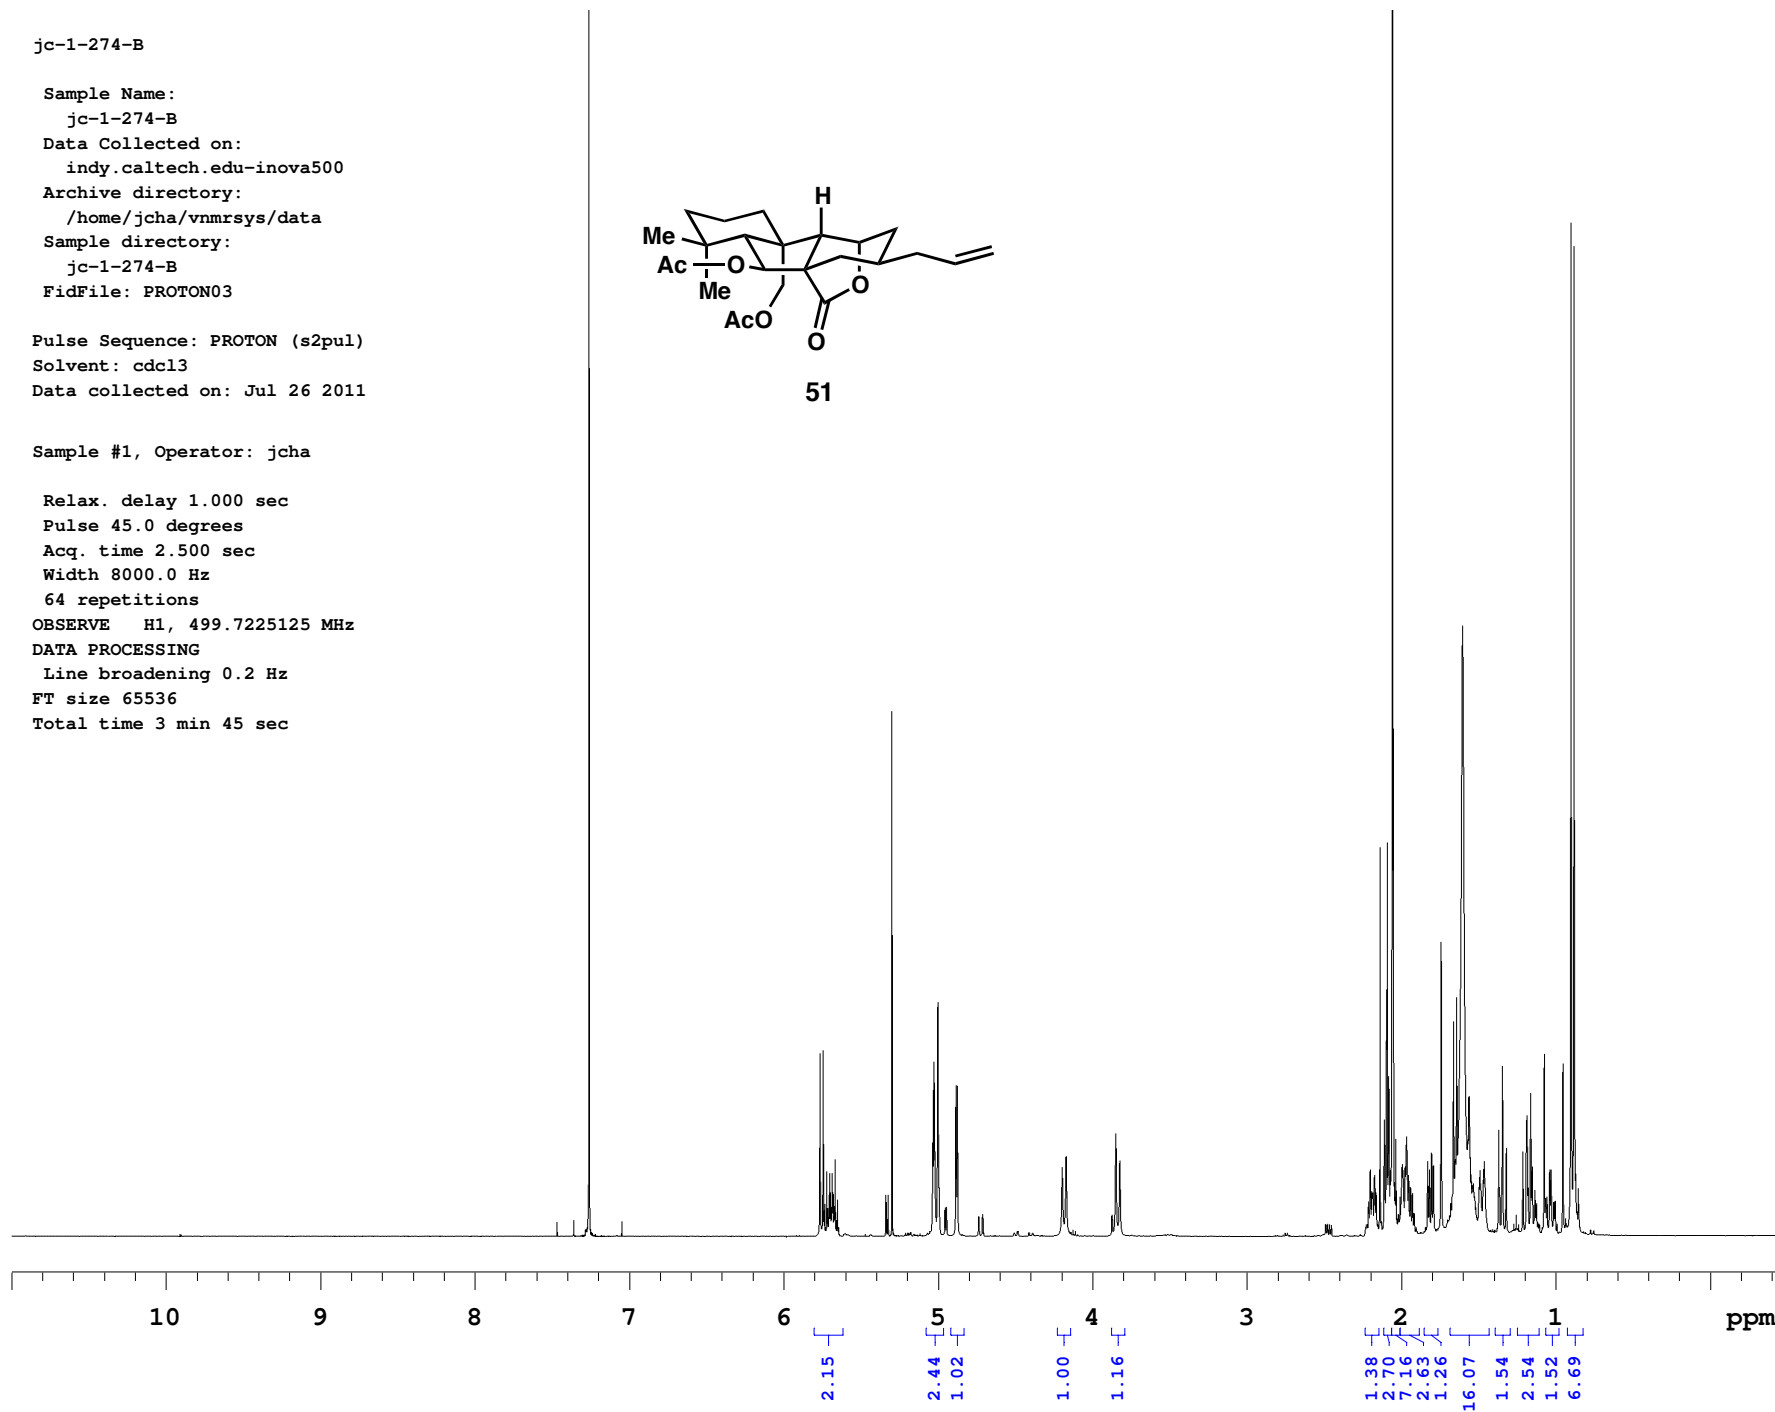

jc-1-274-B

Sample Name:

jc-1-274-B

Data Collected on:

indy.caltech.edu-inova500

Archive directory:

/home/jcha/vnmrsys/data

Sample directory:

jc-1-274-B

FidFile: CARBON01

Pulse Sequence: CARBON (s2pul)

Solvent: cdc13

Data collected on: Jul 26 2011

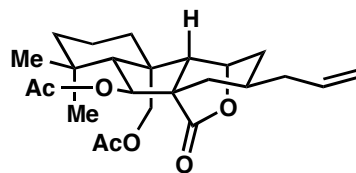

51

Sample #1, Operator: jcha

Relax. delay 0.500 sec

Pulse 45.0 degrees

Acq. time 1.042 sec

Width 31446.5 Hz

2250 repetitions

OBSERVE C13, 125.6553271 MHz

DECOUPLE H1, 499.7250019 MHz

Power 39 dB

continuously on

WALTZ-16 modulated

DATA PROCESSING

Line broadening 0.5 Hz

FT size 65536

Total time 58 min

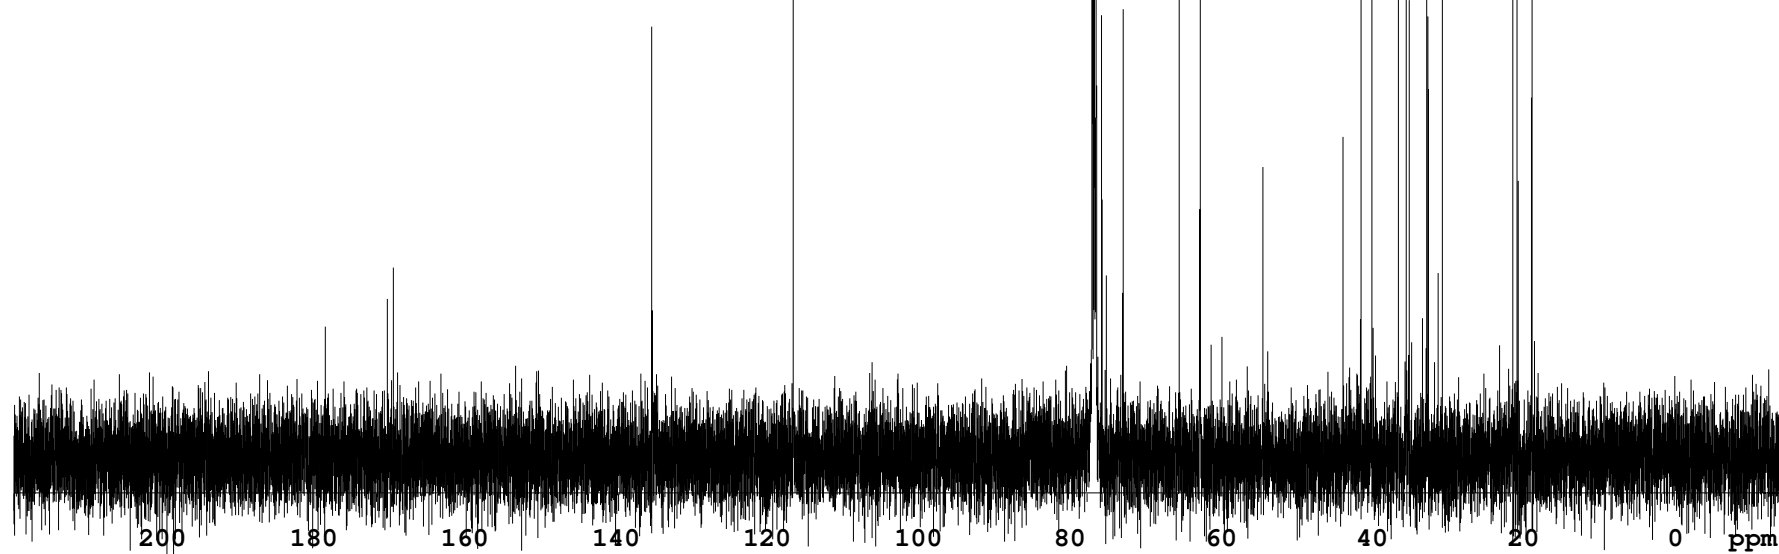

jc-1-276-A

Sample Name:

jc-1-276-A

Data Collected on:

indy.caltech.edu-inova500

Archive directory:

/home/jcha/vnmrsys/data

Sample directory:

jc-1-276-A

FidFile: PROTON02

Pulse Sequence: PROTON (s2pul)

Solvent: cdcl3

Data collected on: Jun 30 2011

Sample #1, Operator: jcha

Relax. delay 2.000 sec

Pulse 45.0 degrees

Acq. time 2.500 sec

Width 8000.0 Hz

32 repetitions

OBSERVE H1, 499.7290200 MHz

DATA PROCESSING

Line broadening 0.2 Hz

FT size 65536

Total time 2 min 24 sec

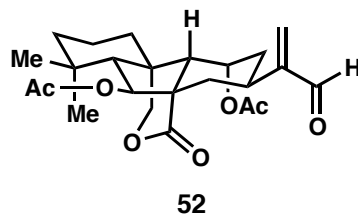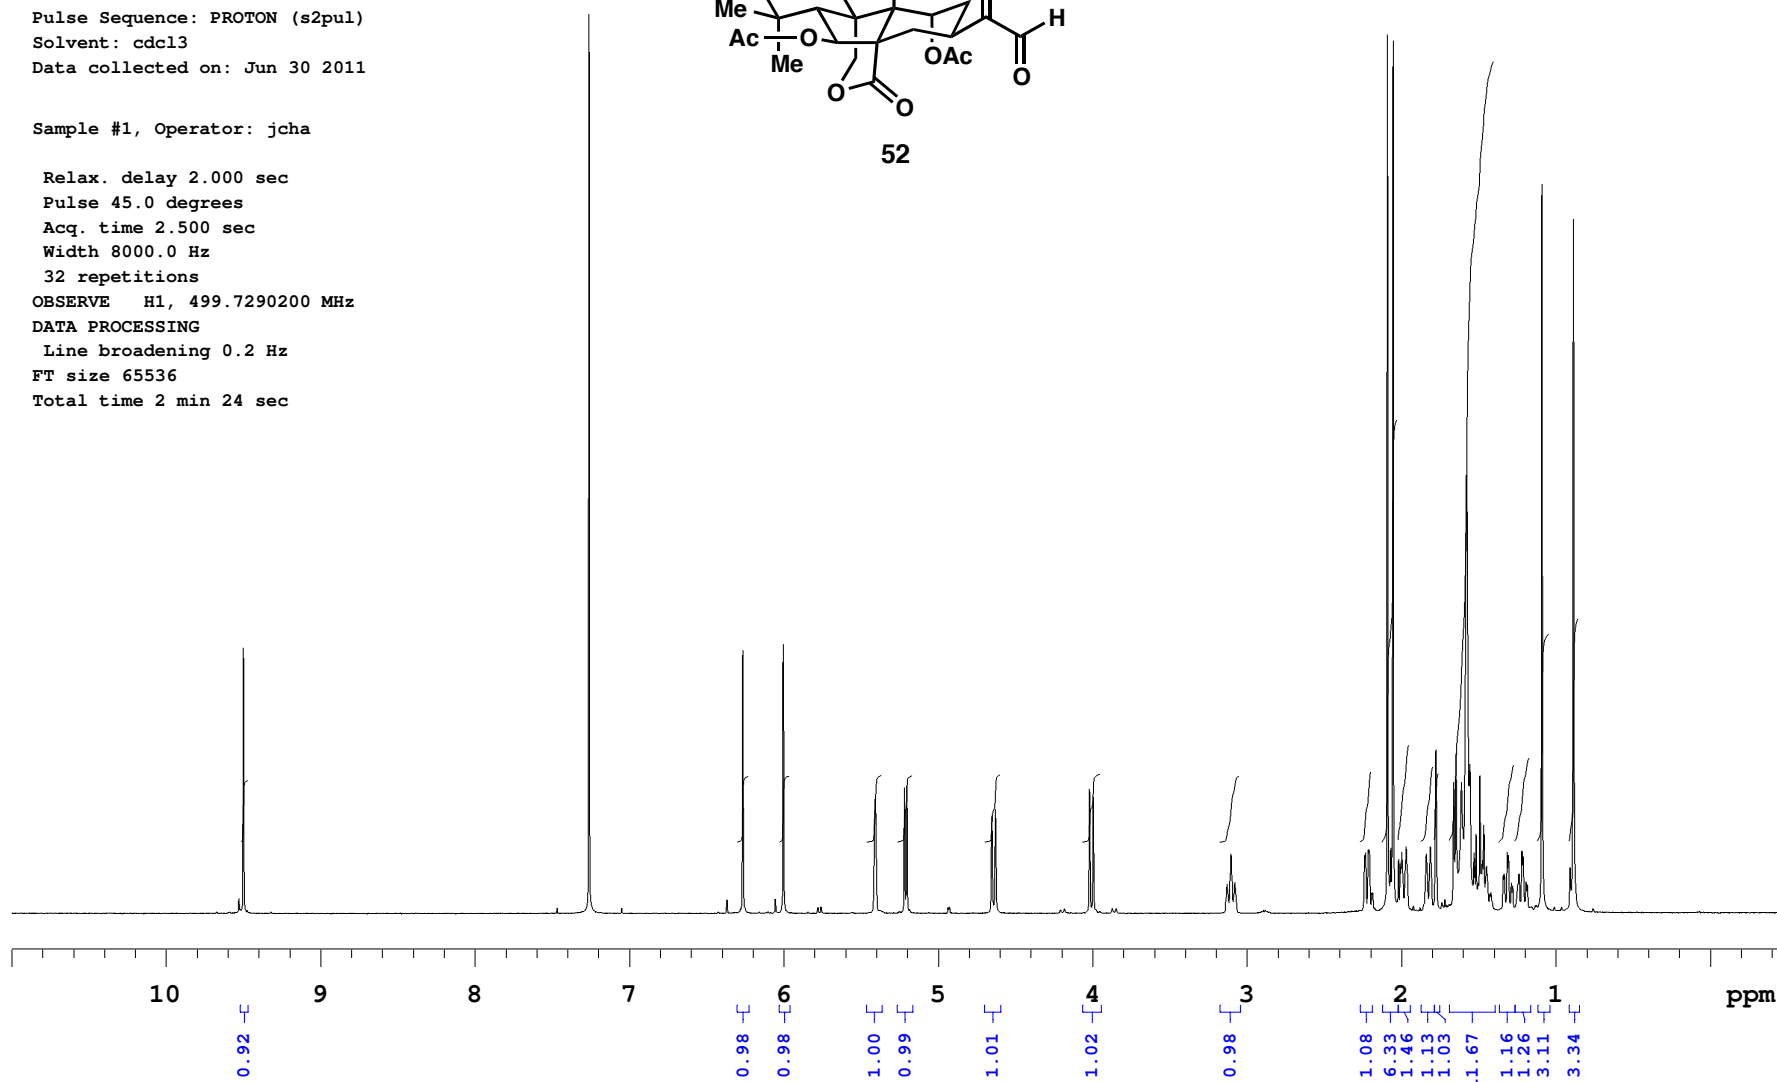

jc-1-276-A

Sample Name:  
jc-1-276-A  
Data Collected on:  
indy.caltech.edu-inova500  
Archive directory:  
/home/jcha/vnmrsys/data  
Sample directory:  
jc-1-276-A  
FidFile: CARBON01

Pulse Sequence: CARBON (s2pul)  
Solvent: cdc13  
Data collected on: Jun 30 2011

Sample #1, Operator: jcha

Relax. delay 2.000 sec  
Pulse 45.0 degrees  
Acq. time 1.042 sec  
Width 31446.5 Hz  
9400 repetitions  
OBSERVE C13, 125.6569623 MHz  
DECOUPLE H1, 499.7315163 MHz  
Power 39 dB  
continuously on  
WALTZ-16 modulated  
DATA PROCESSING  
Line broadening 0.5 Hz  
FT size 65536  
Total time 7 hr, 58 min

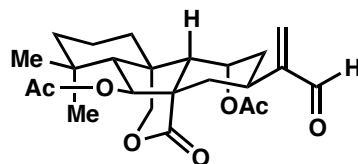

52

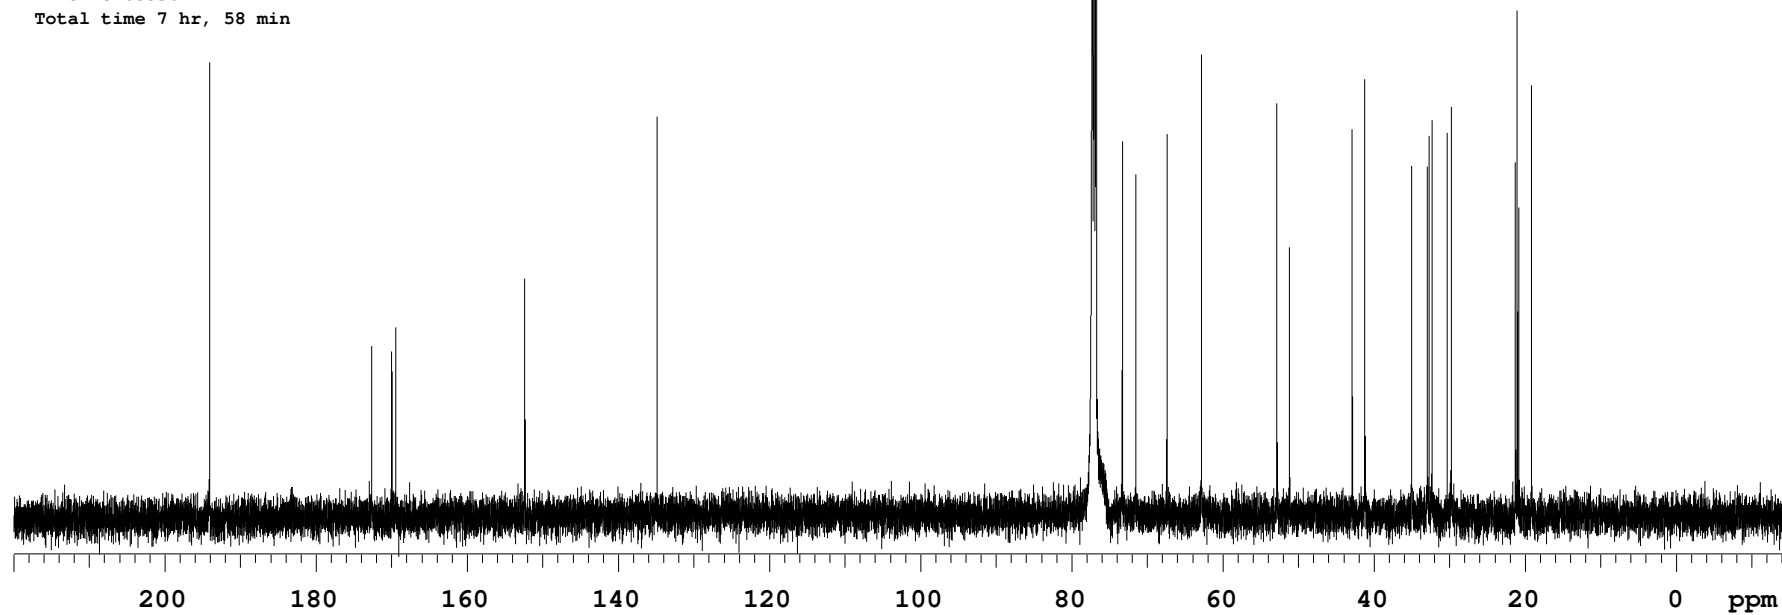

jc-1-277-pyridine

Sample Name:  
jc-1-277-pyridine  
Data Collected on:  
indy.caltech.edu-inova500  
Archive directory:  
/home/jcha/vnmrsys/data  
Sample directory:  
jc-1-277-pyridine  
FidFile: PROTON01

Pulse Sequence: PROTON (s2pul)  
Solvent: pyridine  
Data collected on: Aug 2 2011

Sample #46, Operator: jcha

Relax. delay 3.000 sec  
Pulse 45.0 degrees  
Acq. time 2.500 sec  
Width 8000.0 Hz  
128 repetitions  
OBSERVE H1, 499.7217631 MHz  
DATA PROCESSING  
Line broadening 0.4 Hz  
FT size 65536  
Total time 23 min

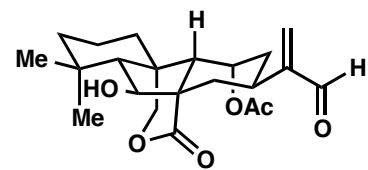

**(-)-maoecrystal Z (1)**

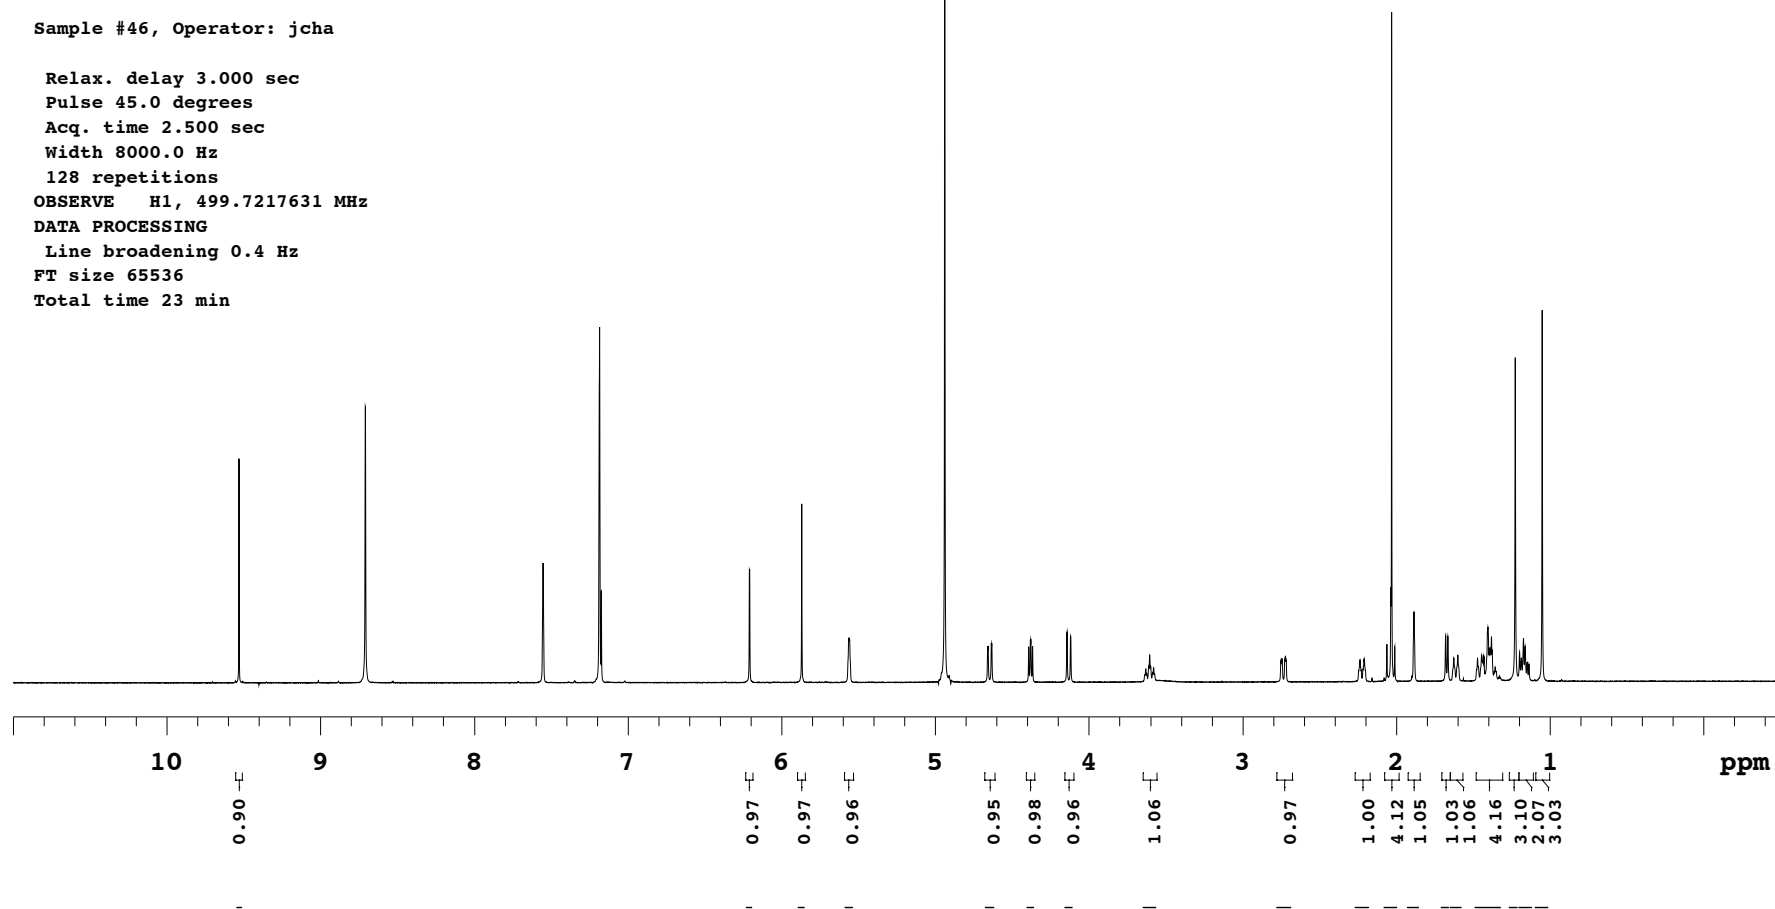



jc-1-277-pyridine

Sample Name:  
jc-1-277-pyridine  
Data Collected on:  
indy.caltech.edu-inova500  
Archive directory:  
/home/jcha/vnmrsys/data  
Sample directory:  
jc-1-277-pyridine  
FidFile: CARBON02

Pulse Sequence: CARBON (s2pul)  
Solvent: pyridine  
Data collected on: Aug 2 2011

Sample #1, Operator: jcha

Relax. delay 0.500 sec  
Pulse 45.0 degrees  
Acq. time 1.042 sec  
Width 31446.5 Hz  
15000 repetitions  
OBSERVE C13, 125.6552964 MHz  
DECOUPLE H1, 499.7248470 MHz  
Power 39 dB  
continuously on  
WALTZ-16 modulated  
DATA PROCESSING  
Line broadening 1.0 Hz  
FT size 65536  
Total time 6 hr, 27 min

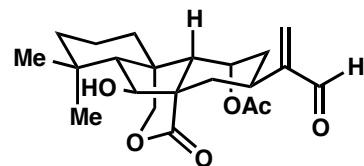

(-)-maoecrystal Z (1)

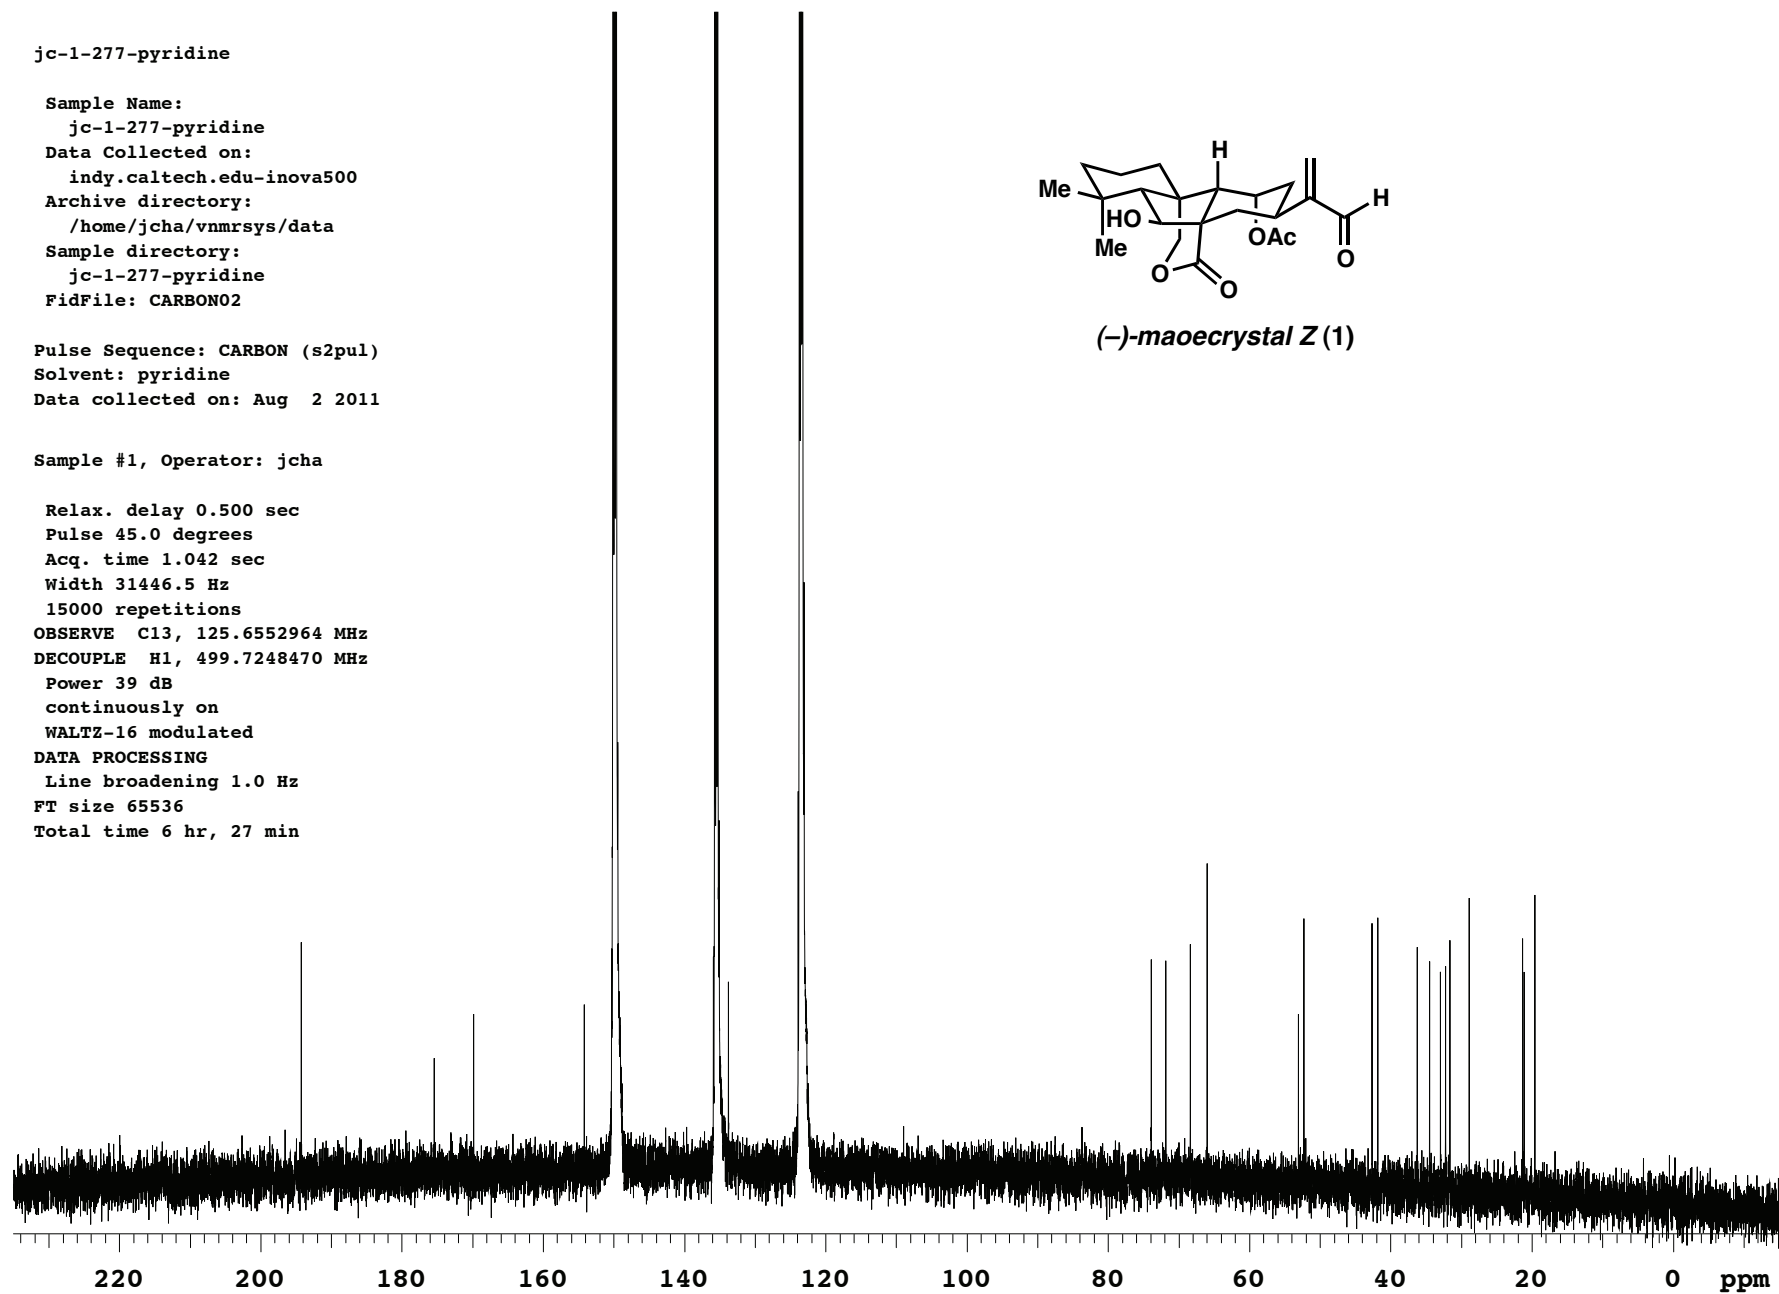

jc-1-277-cdcl3

Sample Name:  
jc-1-277-cdcl3  
Data Collected on:  
indy.caltech.edu-inova500  
Archive directory:  
/home/jcha/vnmrsys/data  
Sample directory:  
jc-1-277-cdcl3  
FidFile: PROTON01

Pulse Sequence: PROTON (s2pul)  
Solvent: cdcl3  
Data collected on: Aug 2 2011

Sample #46, Operator: jcha

Relax. delay 3.000 sec  
Pulse 45.0 degrees  
Acq. time 2.500 sec  
Width 8000.0 Hz  
128 repetitions  
OBSERVE H1, 499.7225128 MHz  
DATA PROCESSING  
Line broadening 0.4 Hz  
FT size 65536  
Total time 23 min

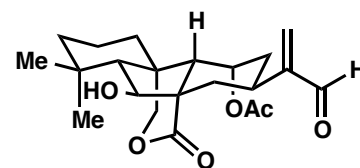

(-)-maoecrystal Z (1)

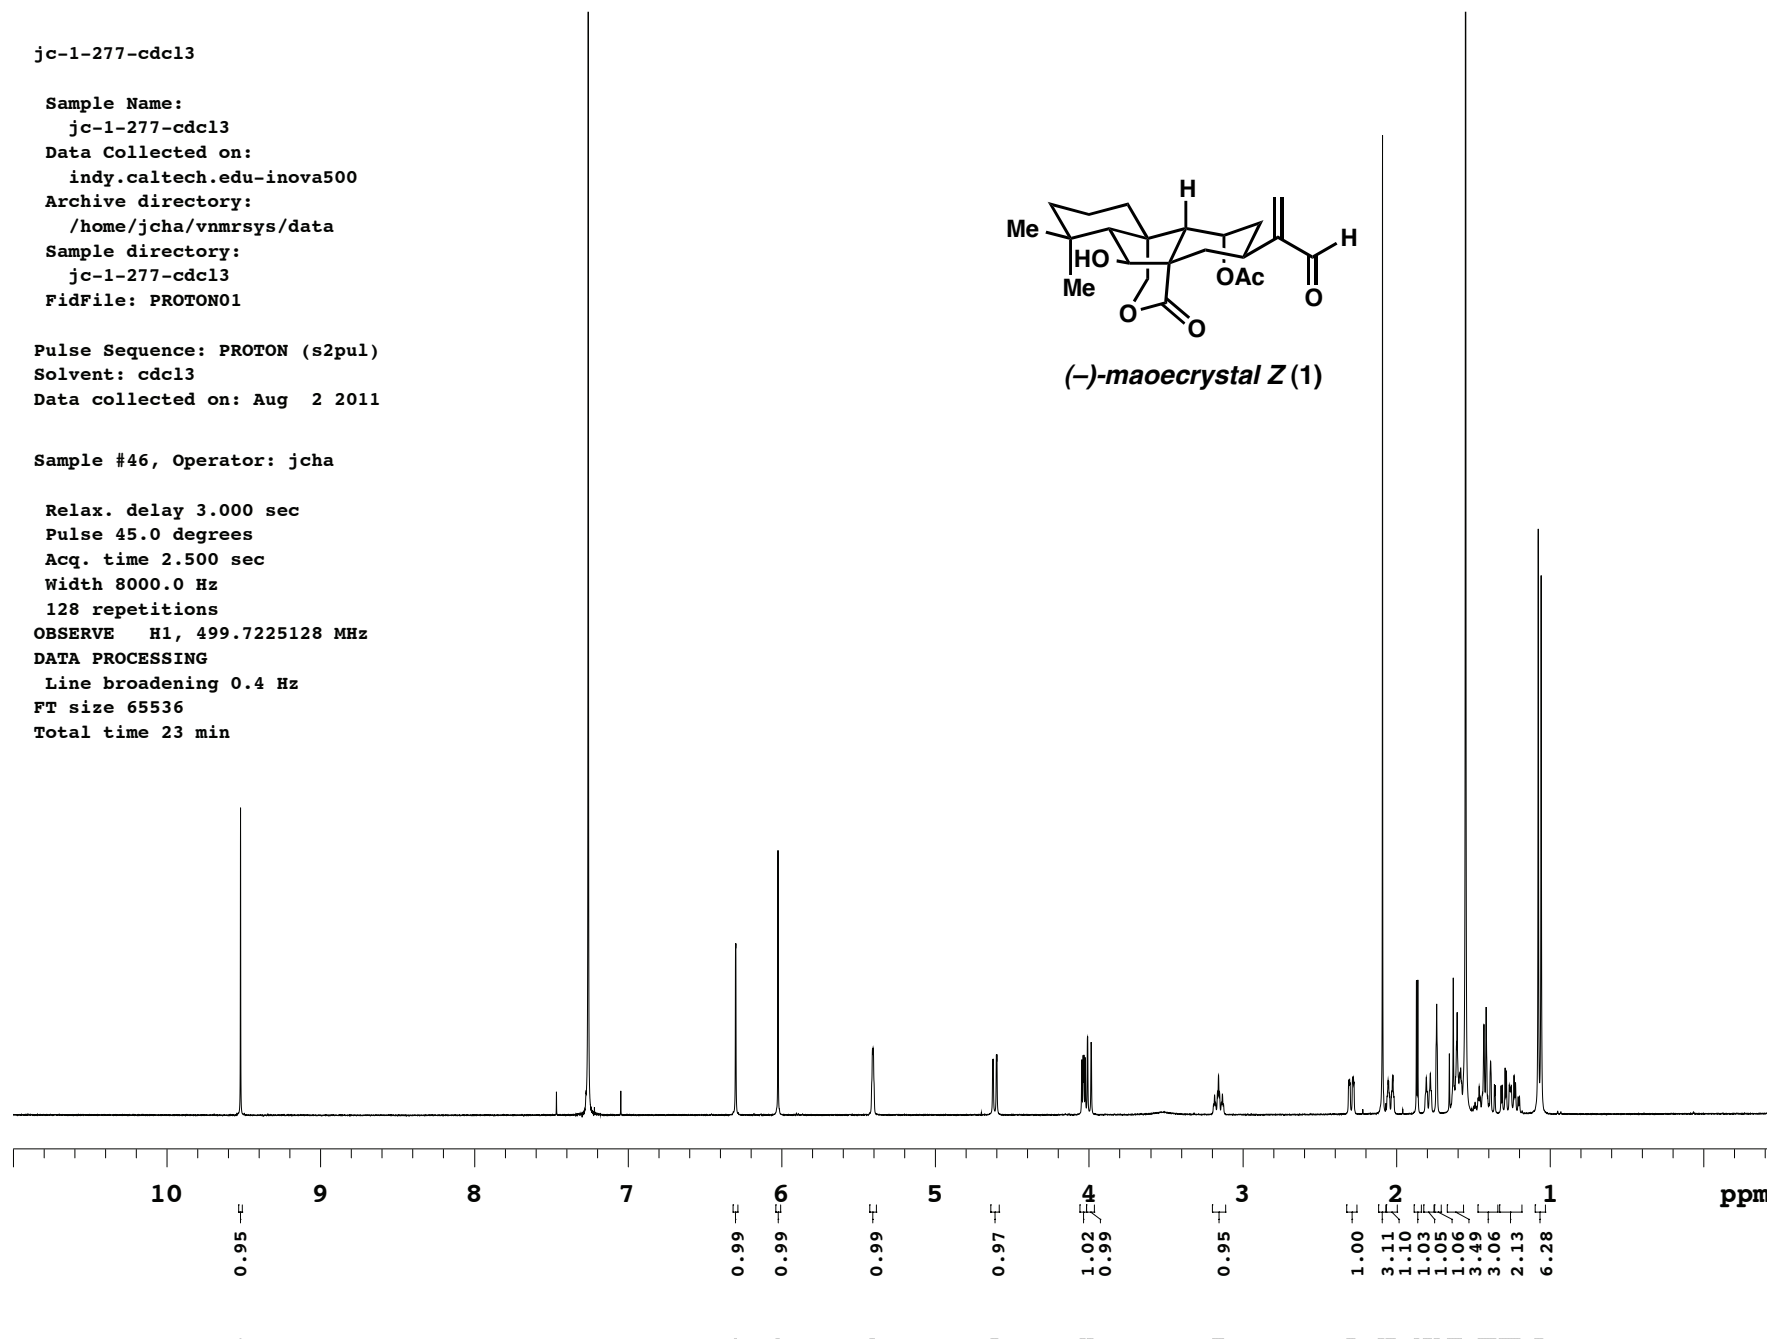

natural sample, from isolation paper:  
*Org. Lett.* **2006**, 8, 4727-4730

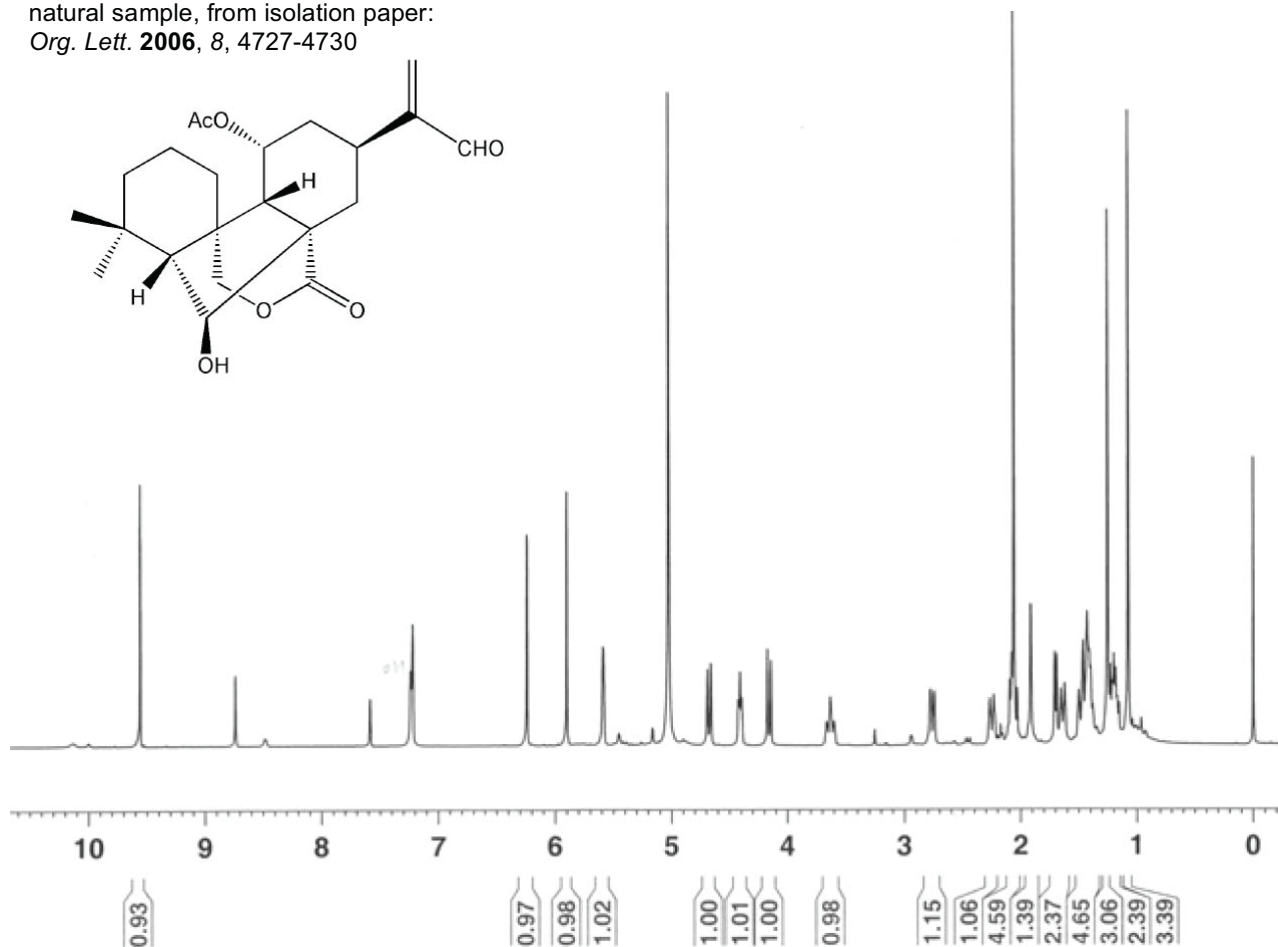

pie #40, operator: jona  
 lax. delay 3.000 sec  
 lse 45.0 degrees  
 q. time 2.500 sec  
 dth 8000.0 Hz  
 8 repetitions  
 ERVE H1, 499.7217632 MHz  
 A PROCESSING  
 ne broadening 0.2 Hz  
 size 65536  
 al time 23 min

synthetic sample

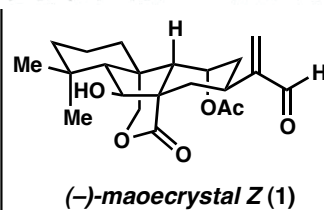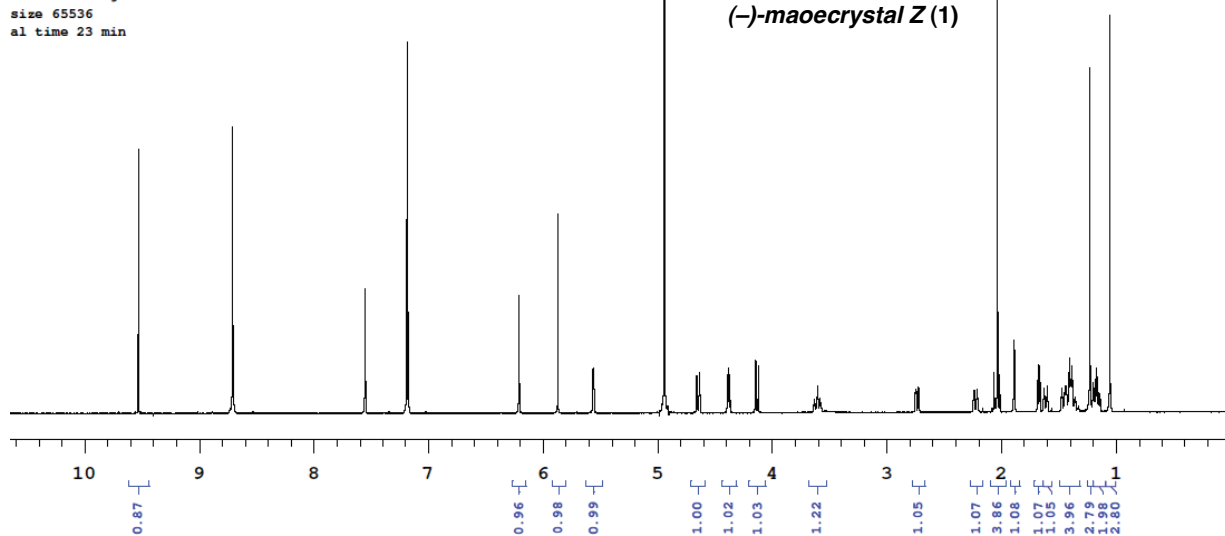

jtsy-viii-101

Sample Name:

jtsy-viii-101

Data Collected on:

indy.caltech.edu-inova500

Archive directory:

/home/yeomanjo/vnmrsys/data

Sample directory:

jtsy-viii-101

FidFile: PROTON01

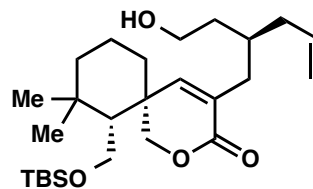

SI-4

Pulse Sequence: PROTON (s2pul)

Solvent: cdcl3

Data collected on: May 31 2012

Sample #13, Operator: yeomanjo

Relax. delay 10.000 sec

Pulse 45.0 degrees

Acq. time 2.500 sec

Width 8000.0 Hz

8 repetitions

OBSERVE H1, 499.7127407 MHz

DATA PROCESSING

Line broadening 0.2 Hz

FT size 65536

Total time 1 min 40 sec

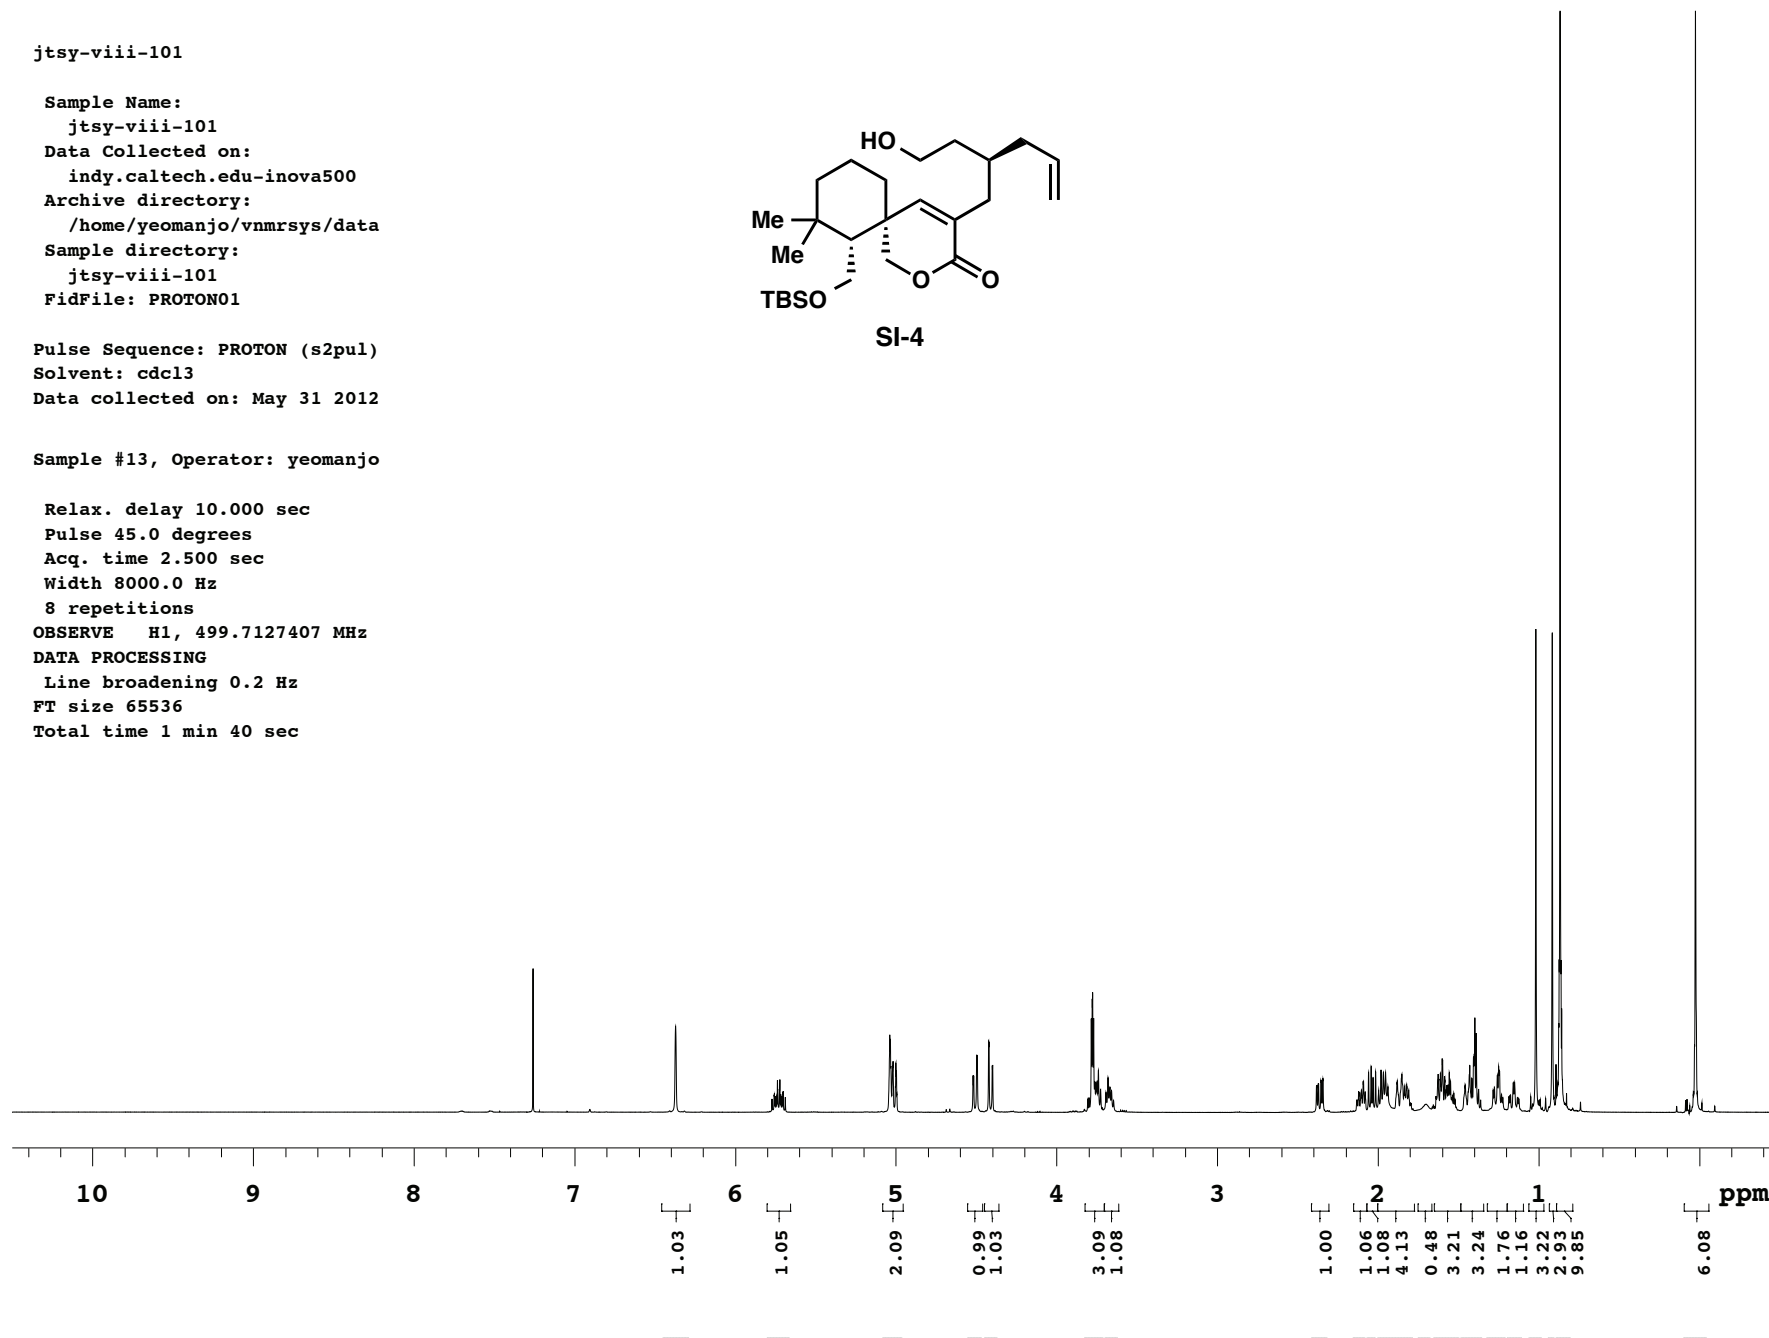

jtsy-viii-101

Sample Name:

jtsy-viii-101

Data Collected on:

indy.caltech.edu-inova500

Archive directory:

/home/yeomanjo/vnmrsys/data

Sample directory:

jtsy-viii-101

FidFile: CARBON01

Pulse Sequence: CARBON (s2pul)

Solvent: cdcl3

Data collected on: May 31 2012

Sample #13, Operator: yeomanjo

Relax. delay 1.000 sec

Pulse 45.0 degrees

Acq. time 1.042 sec

Width 31446.5 Hz

512 repetitions

OBSERVE C13, 125.6528709 MHz

DECOUPLE H1, 499.7152303 MHz

Power 39 dB

continuously on

WALTZ-16 modulated

DATA PROCESSING

Line broadening 1.0 Hz

FT size 65536

Total time 17 min

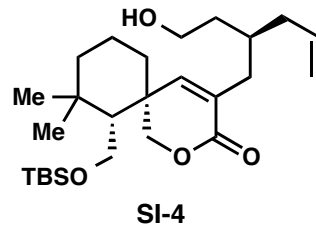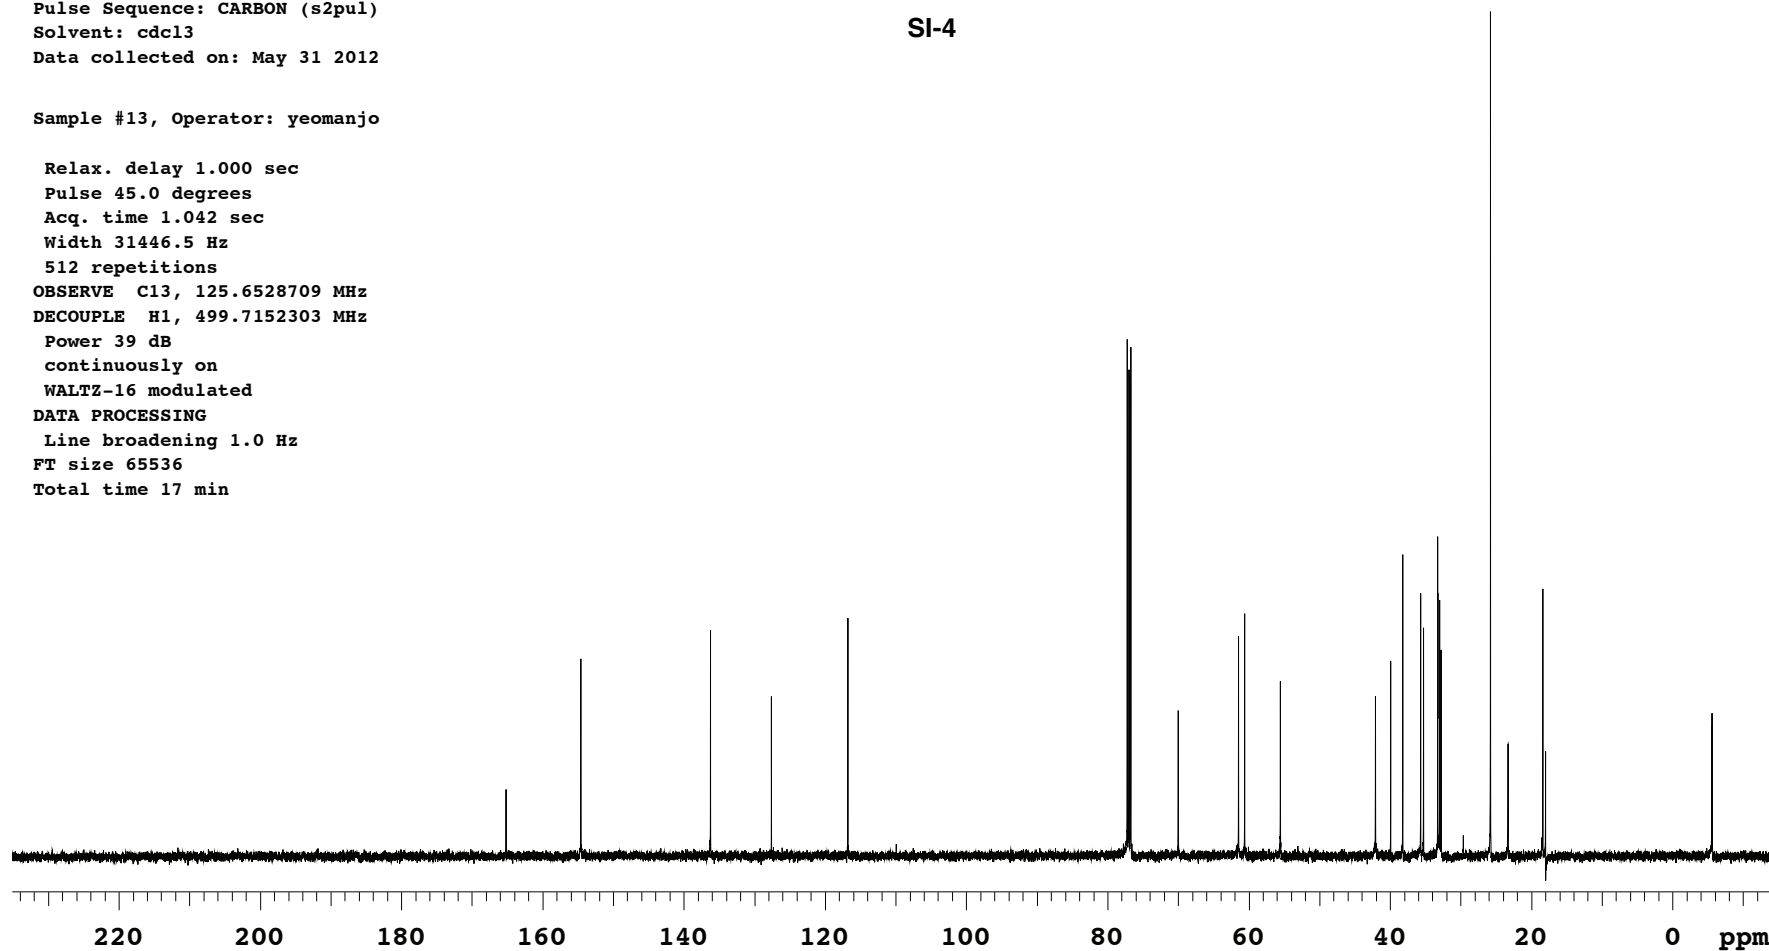

Sample Name:  
 jtsy-viii-097  
 Data Collected on:  
 indy.caltech.edu-inova500  
 Archive directory:  
 /home/yeomanjo/vnmrsys/data  
 Sample directory:  
 jtsy-viii-097  
 FidFile: PROTON01

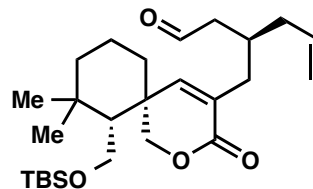

21

Pulse Sequence: PROTON (s2pul)  
 Solvent: cdcl3  
 Data collected on: May 30 2012

Sample #48, Operator: yeomanjo

Relax. delay 10.000 sec  
 Pulse 45.0 degrees  
 Acq. time 2.500 sec  
 Width 8000.0 Hz  
 8 repetitions  
 OBSERVE H1, 499.7127410 MHz  
 DATA PROCESSING  
 Line broadening 0.2 Hz  
 FT size 65536  
 Total time 1 min 40 sec

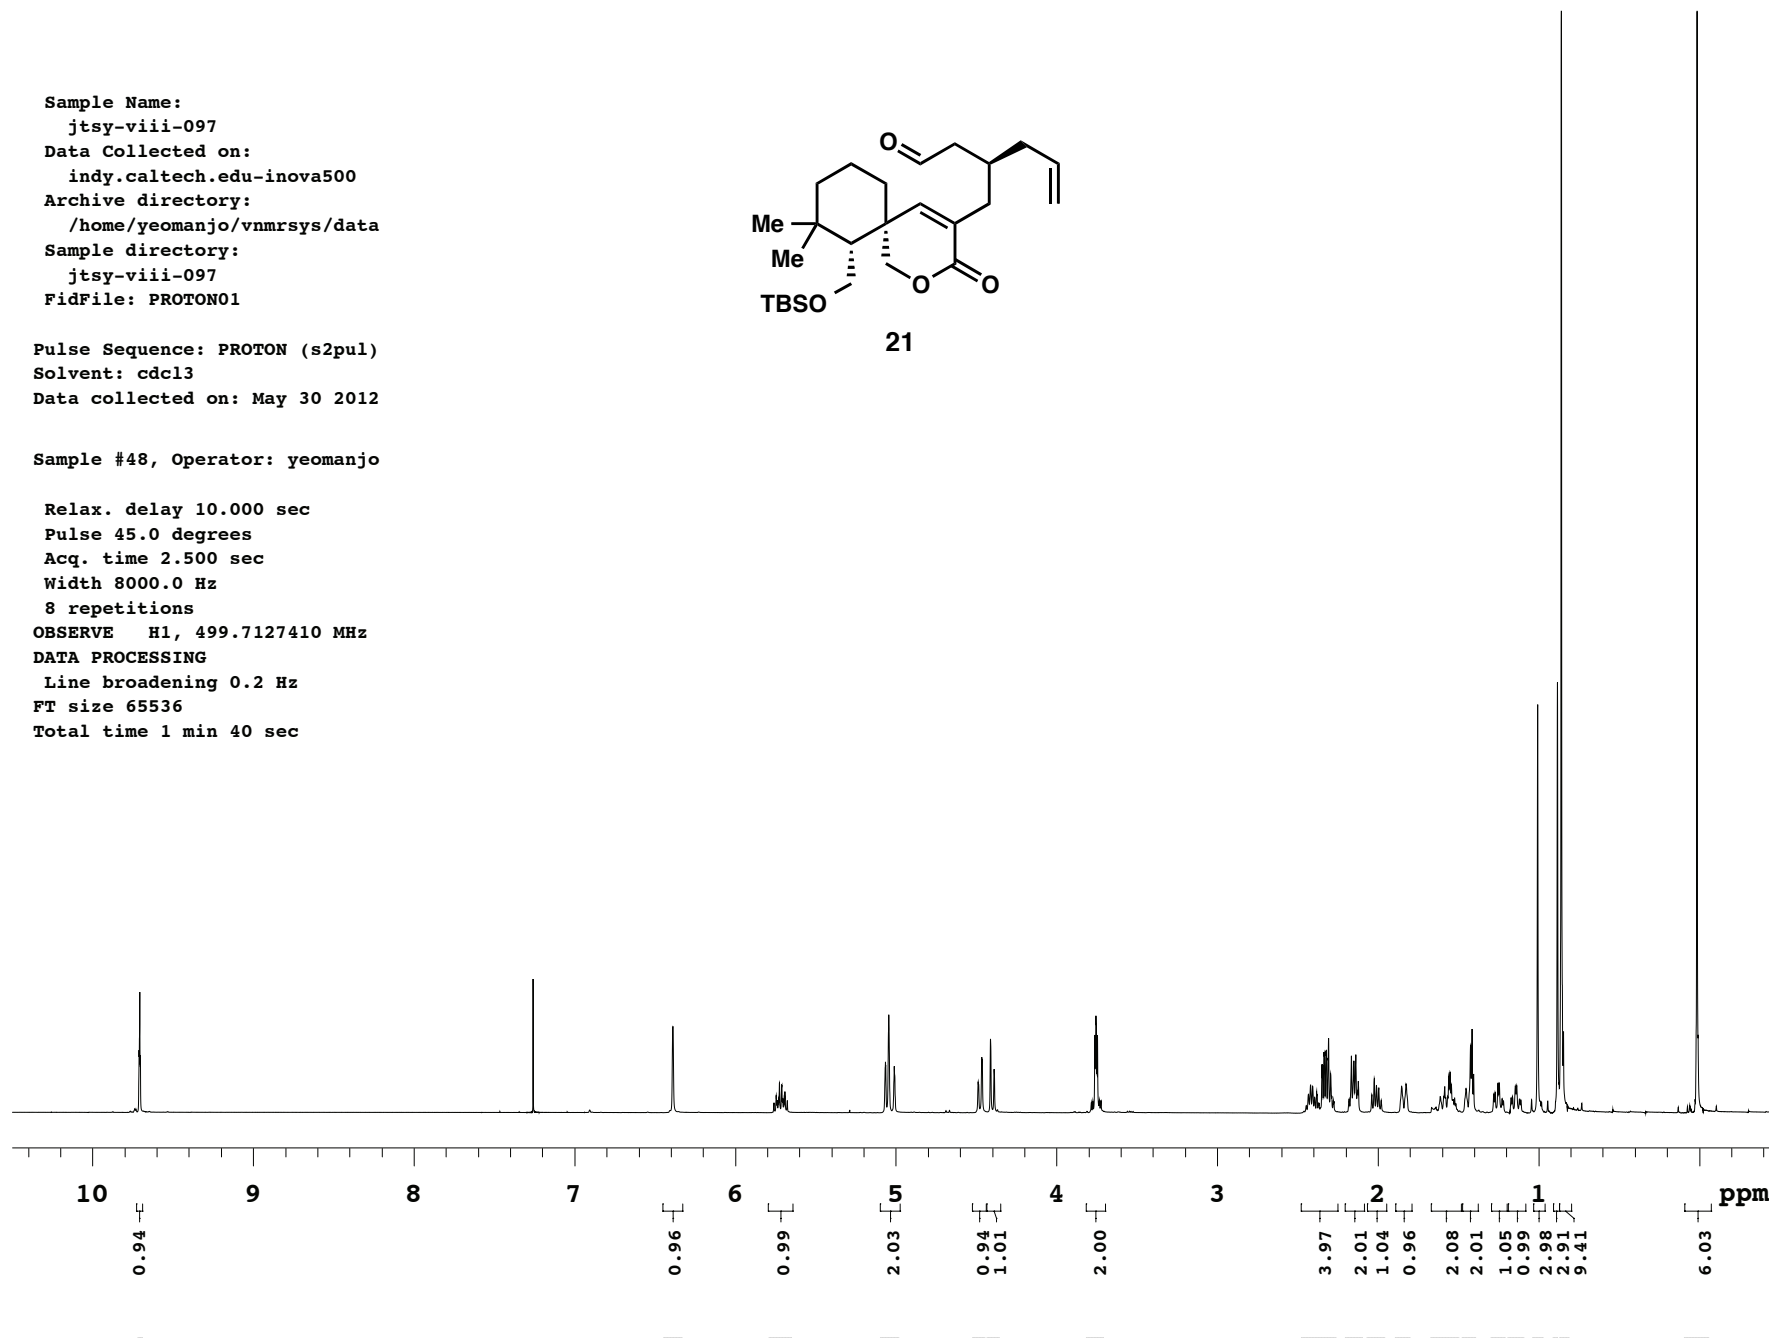

Sample Name:  
jtsy-viii-097  
Data Collected on:  
indy.caltech.edu-inova500  
Archive directory:  
/home/yeomanjo/vnmrsys/data  
Sample directory:  
jtsy-viii-097  
FidFile: CARBON01

Pulse Sequence: CARBON (s2pul)  
Solvent: cdcl3  
Data collected on: May 30 2012

Sample #48, Operator: yeomanjo

Relax. delay 1.000 sec  
Pulse 45.0 degrees  
Acq. time 1.042 sec  
Width 31446.5 Hz  
512 repetitions  
OBSERVE C13, 125.6528718 MHz  
DECOUPLE H1, 499.7152303 MHz  
Power 39 dB  
continuously on  
WALTZ-16 modulated  
DATA PROCESSING  
Line broadening 0.5 Hz  
FT size 65536  
Total time 17 min

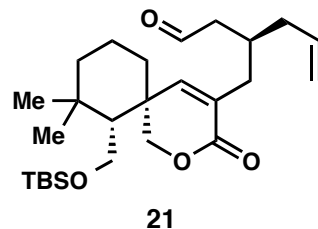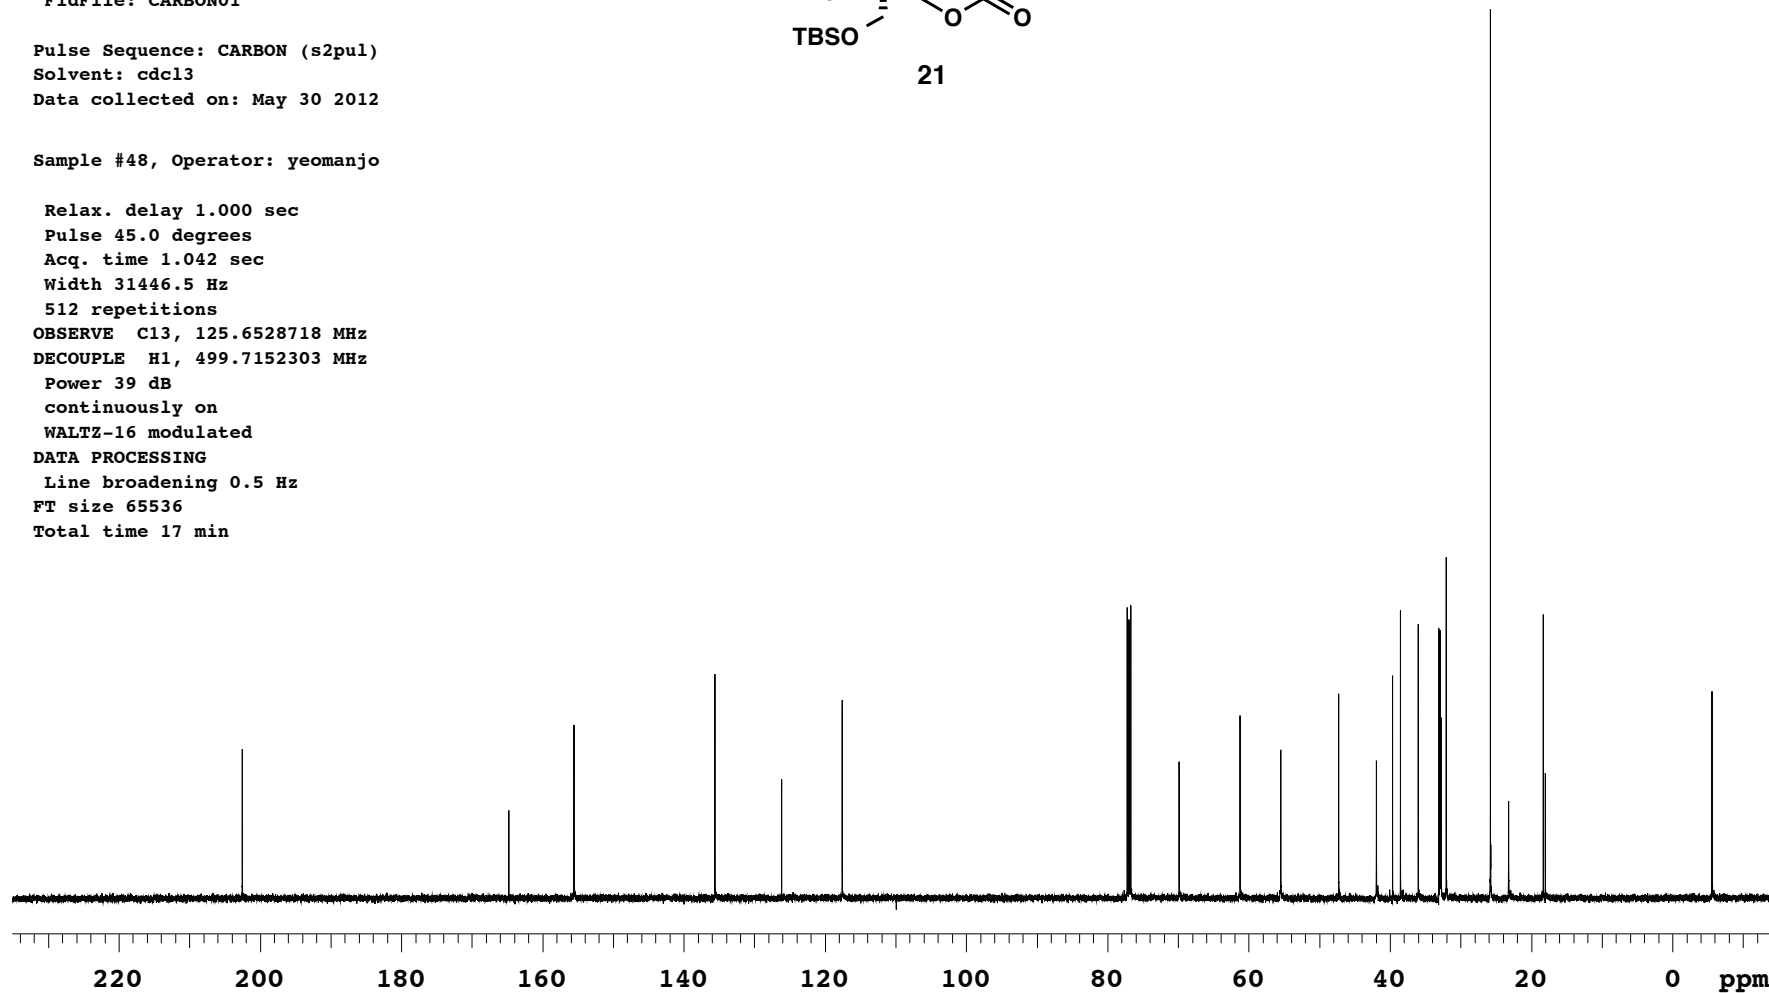

Sample Name:  
 jtsy-vii-089char  
 Data Collected on:  
 indy.caltech.edu-inova500  
 Archive directory:  
 /home/yeomanjo/vnmrsys/data  
 Sample directory:  
 jtsy-vii-089char  
 FidFile: PROTON01

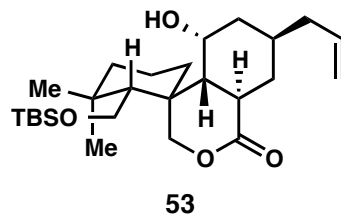

Pulse Sequence: PROTON (s2pul)  
 Solvent: cdcl3  
 Data collected on: Mar 15 2012

Sample #20, Operator: yeomanjo

Relax. delay 10.000 sec  
 Pulse 45.0 degrees  
 Acq. time 2.500 sec  
 Width 8000.0 Hz  
 8 repetitions  
 OBSERVE H1, 499.7225128 MHz  
 DATA PROCESSING  
 Line broadening 0.2 Hz  
 FT size 65536  
 Total time 1 min 40 sec

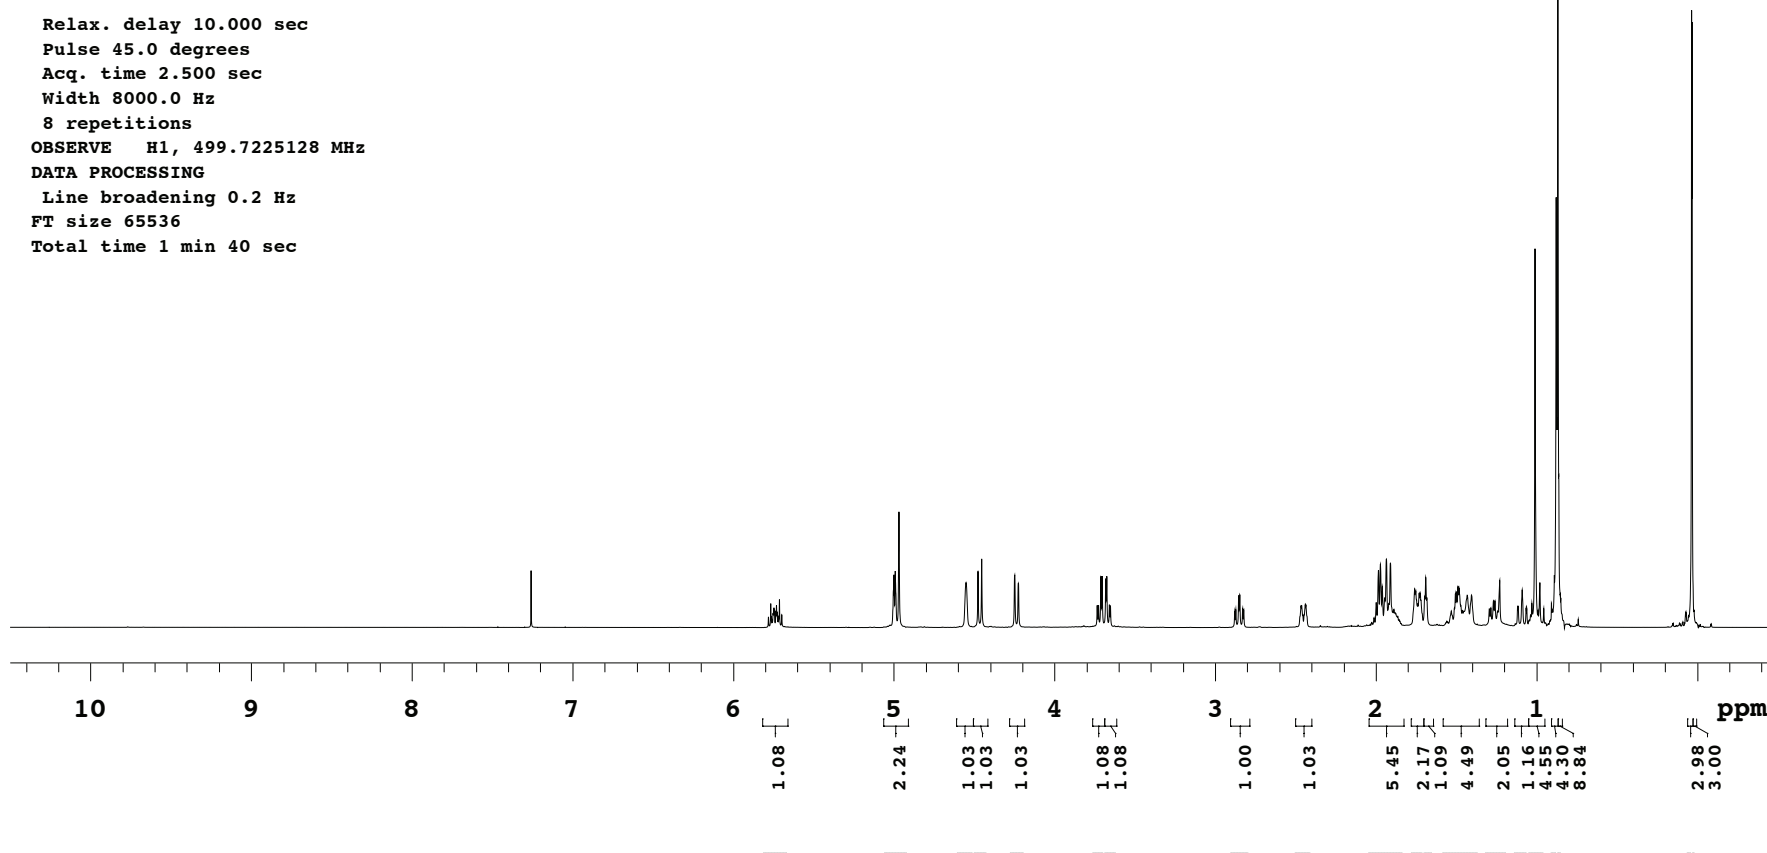



Sample Name:  
 jtsy-vii-089char  
 Data Collected on:  
 indy.caltech.edu-inova500  
 Archive directory:  
 /home/yeomanjo/vnmrsys/data  
 Sample directory:  
 jtsy-vii-089char  
 FidFile: CARBON01

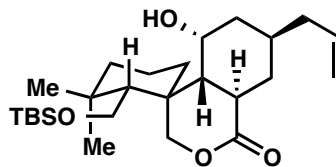

53

Pulse Sequence: CARBON (s2pul)  
 Solvent: cdcl3  
 Data collected on: Mar 15 2012

Sample #20, Operator: yeomanjo

Relax. delay 1.000 sec  
 Pulse 45.0 degrees  
 Acq. time 1.042 sec  
 Width 31446.5 Hz  
 512 repetitions  
 OBSERVE C13, 125.6553299 MHz  
 DECOUPLE H1, 499.7250019 MHz  
 Power 39 dB  
 continuously on  
 WALTZ-16 modulated  
 DATA PROCESSING  
 Line broadening 0.5 Hz  
 FT size 65536  
 Total time 17 min

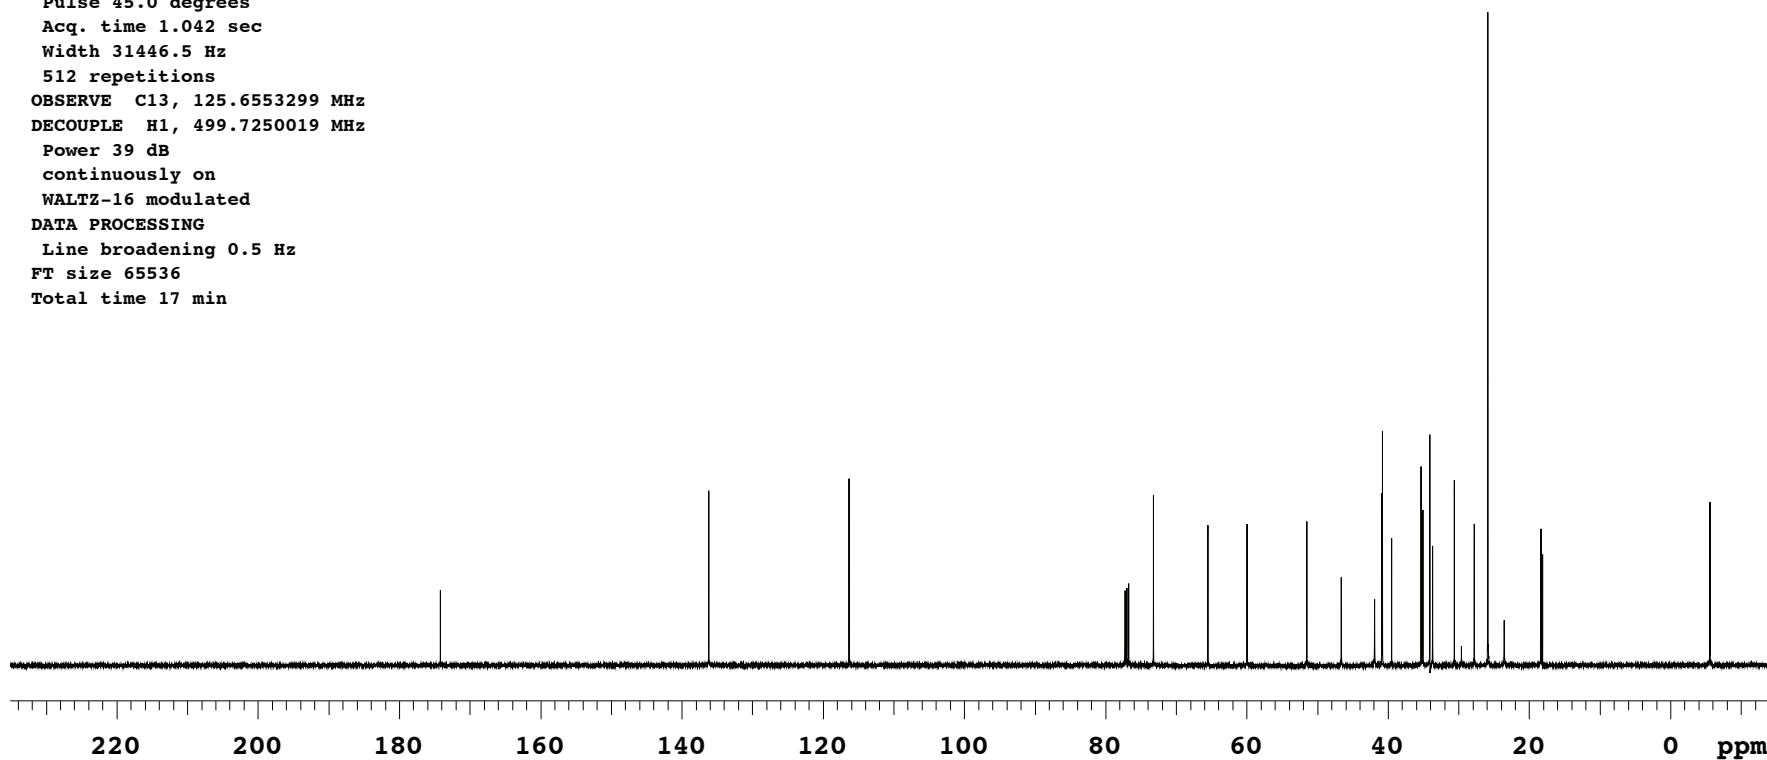

Sample Name:  
 jtsy-vii-191char  
 Data Collected on:  
 indy.caltech.edu-inova500  
 Archive directory:  
 /home/yeomanjo/vnmrsys/data  
 Sample directory:  
 jtsy-vii-191char  
 FidFile: PROTON01

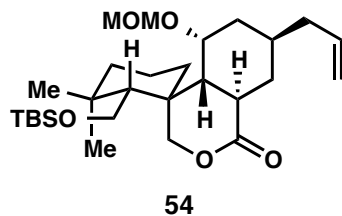

Pulse Sequence: PROTON (s2pul)  
 Solvent: cdcl3  
 Data collected on: Feb 14 2012

Sample #14, Operator: yeomanjo

Relax. delay 10.000 sec  
 Pulse 45.0 degrees  
 Acq. time 2.500 sec  
 Width 8000.0 Hz  
 8 repetitions  
 OBSERVE H1, 499.7225195 MHz  
 DATA PROCESSING  
 Line broadening 0.2 Hz  
 FT size 65536  
 Total time 1 min 40 sec

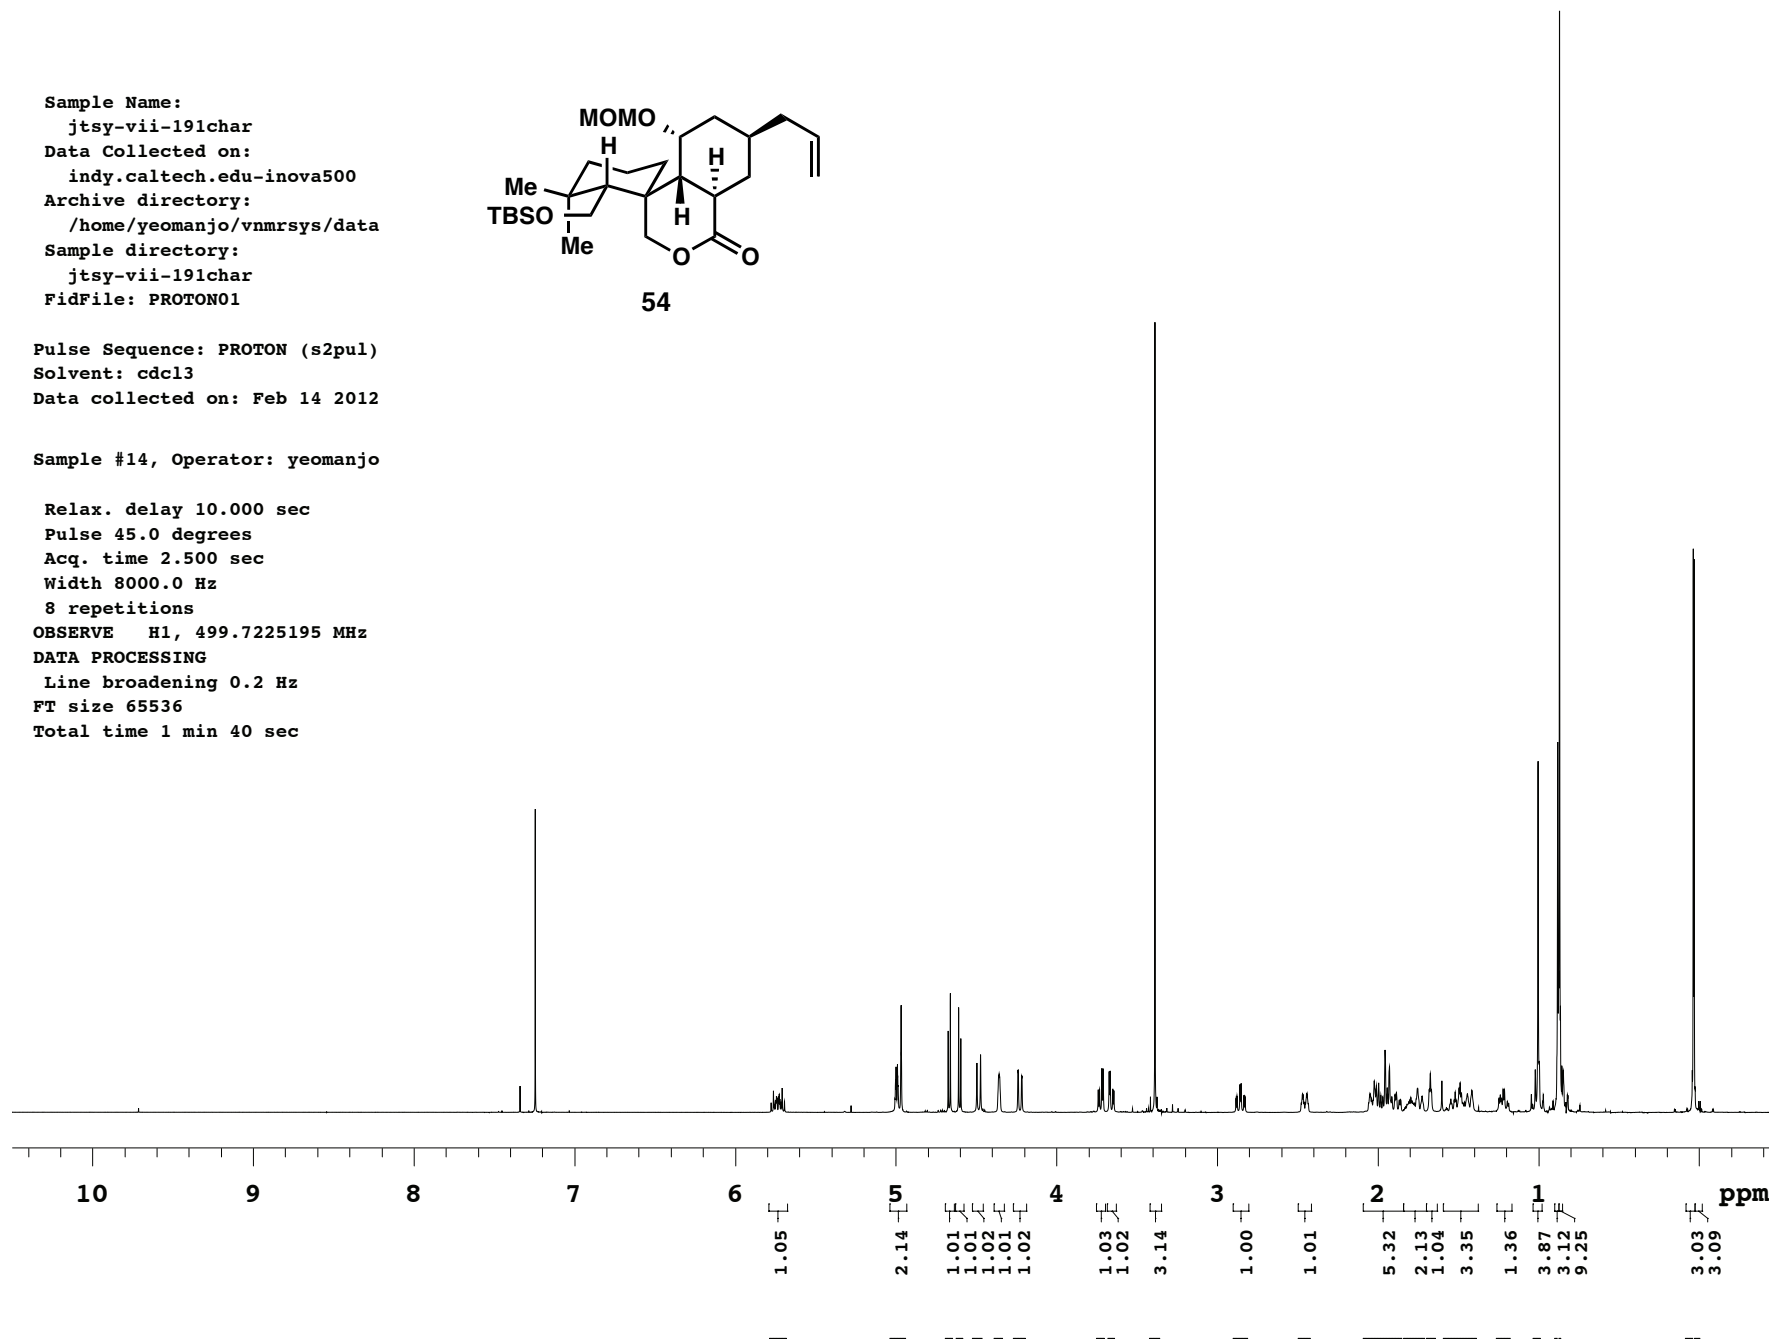

Sample Name:  
jtsy-vii-191char  
Data Collected on:  
indy.caltech.edu-inova500  
Archive directory:  
/home/yeomanjo/vnmrsys/data  
Sample directory:  
jtsy-vii-191char  
FidFile: CARBON01

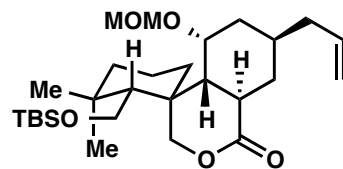

54

Pulse Sequence: CARBON (s2pul)  
Solvent: cdcl3  
Data collected on: Feb 14 2012

Sample #14, Operator: yeomanjo

Relax. delay 1.000 sec  
Pulse 45.0 degrees  
Acq. time 1.042 sec  
Width 31446.5 Hz  
512 repetitions  
OBSERVE C13, 125.6553270 MHz  
DECOUPLE H1, 499.7250019 MHz  
Power 39 dB  
continuously on  
WALTZ-16 modulated  
DATA PROCESSING  
Line broadening 0.5 Hz  
FT size 65536  
Total time 17 min

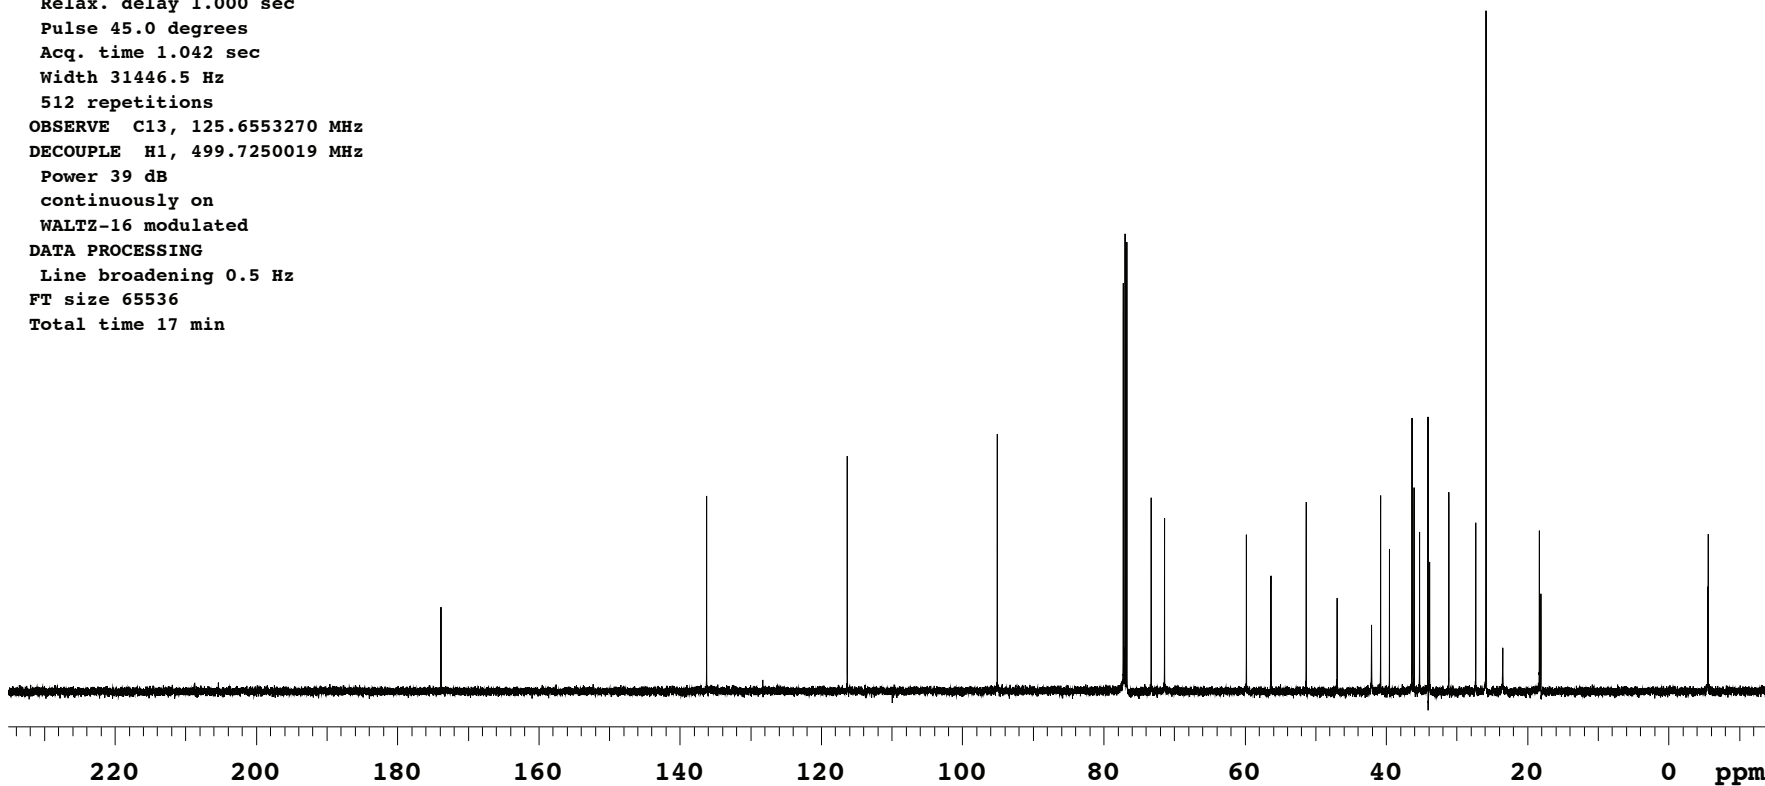

Sample Name:  
 jtsy-vii-231plug  
 Data Collected on:  
 indy.caltech.edu-inova500  
 Archive directory:  
 /home/yeomanjo/vnmrsys/data  
 Sample directory:  
 jtsy-vii-231plug  
 FidFile: PROTON01

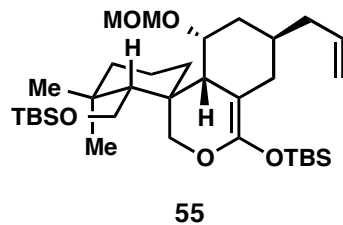

Pulse Sequence: PROTON (s2pul)  
 Solvent: cdcl3  
 Data collected on: Feb 28 2012

Sample #20, Operator: yeomanjo

Relax. delay 10.000 sec  
 Pulse 45.0 degrees  
 Acq. time 2.500 sec  
 Width 8000.0 Hz  
 8 repetitions  
 OBSERVE H1, 499.7225125 MHz  
 DATA PROCESSING  
 Line broadening 0.2 Hz  
 FT size 65536  
 Total time 1 min 40 sec

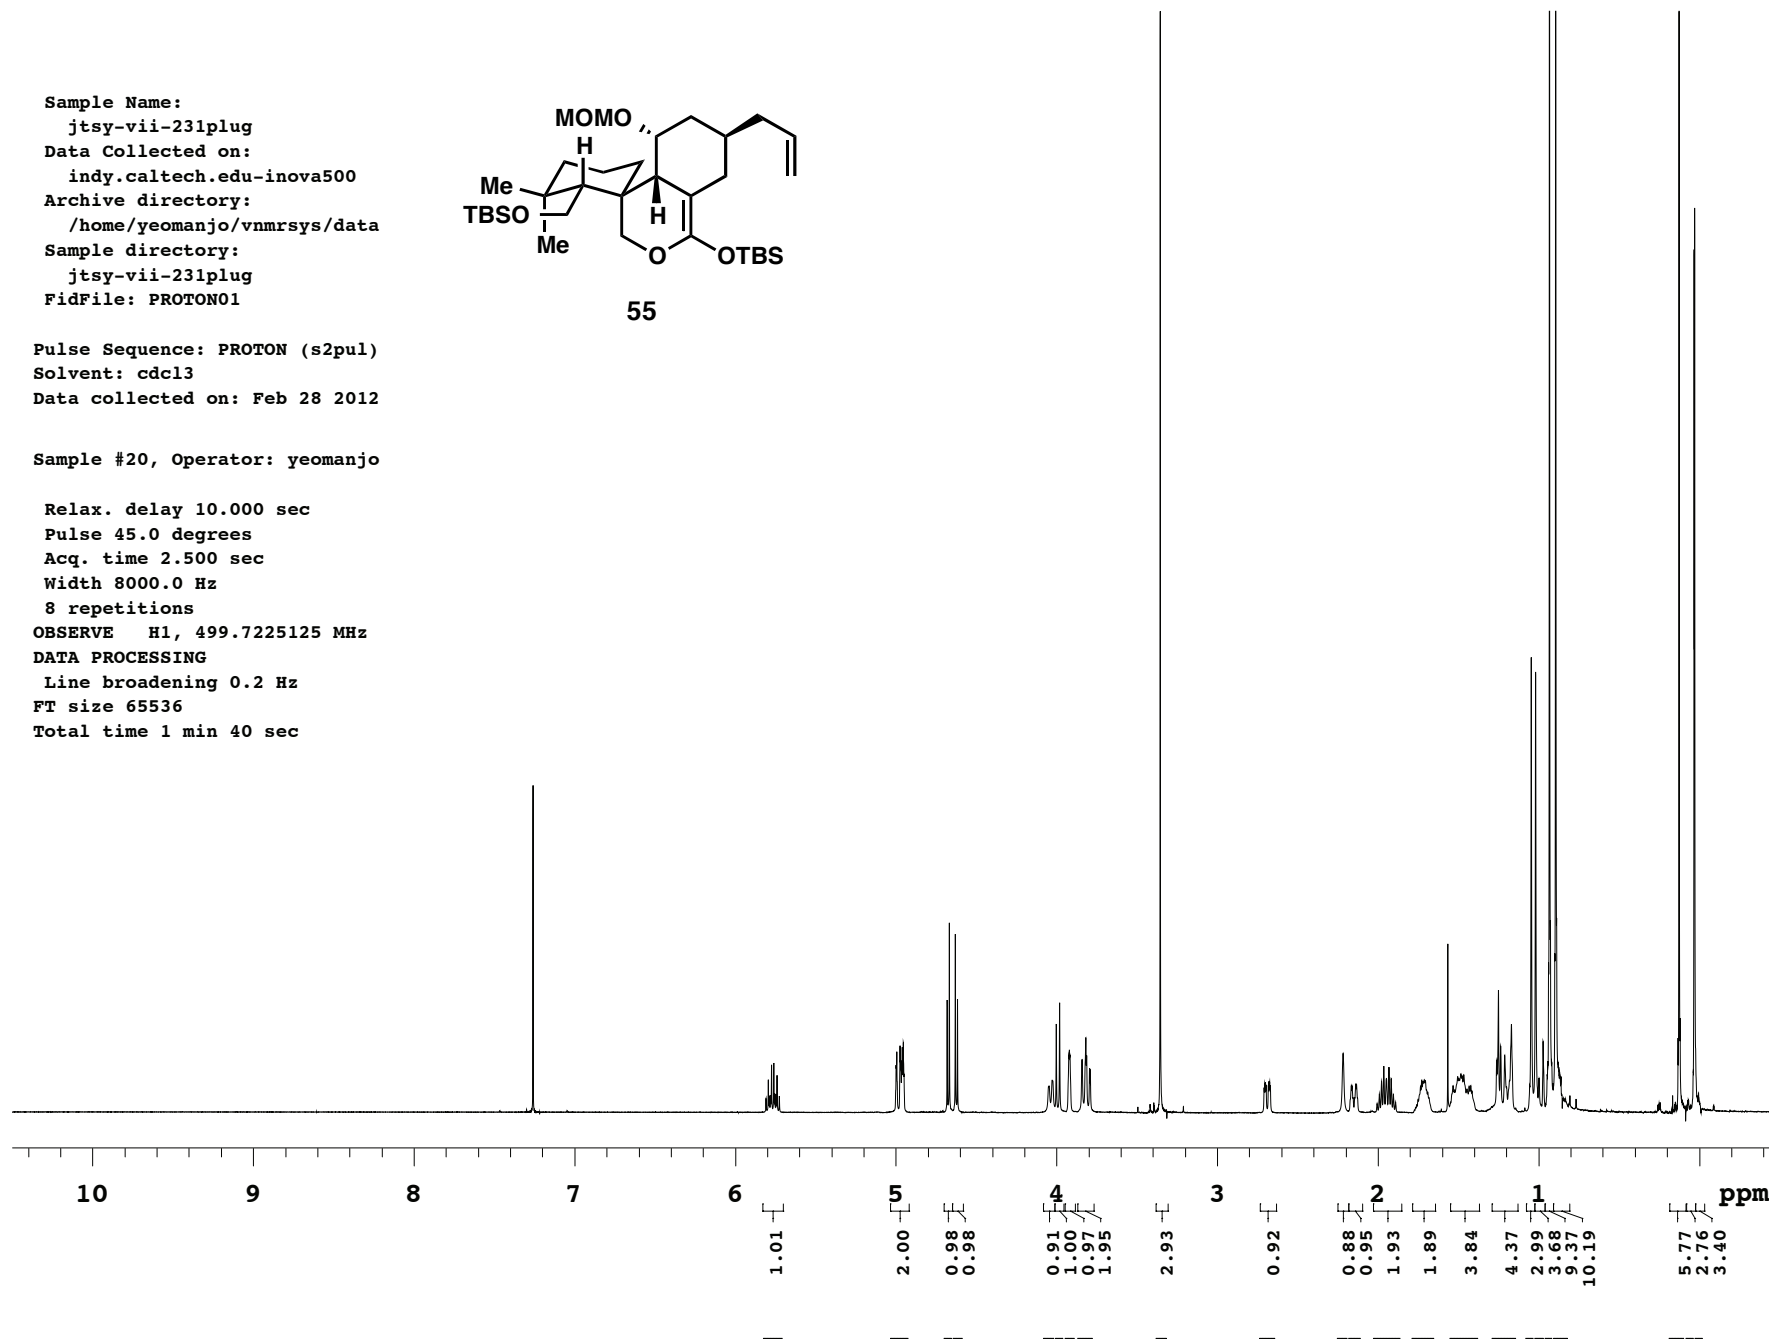

Sample Name:  
 jtsy-vii-231plug  
 Data Collected on:  
 indy.caltech.edu-inova500  
 Archive directory:  
 /home/yeomanjo/vnmrsys/data  
 Sample directory:  
 jtsy-vii-231plug  
 FidFile: CARBON01

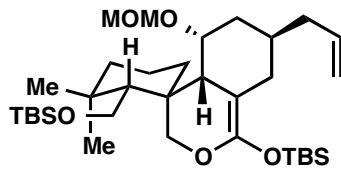

55

Pulse Sequence: CARBON (s2pul)  
 Solvent: cdcl3  
 Data collected on: Feb 28 2012

Sample #20, Operator: yeomanjo

Relax. delay 1.000 sec  
 Pulse 45.0 degrees  
 Acq. time 1.042 sec  
 Width 31446.5 Hz  
 1700 repetitions  
 OBSERVE C13, 125.6553261 MHz  
 DECOUPLE H1, 499.7250019 MHz  
 Power 39 dB  
 continuously on  
 WALTZ-16 modulated  
 DATA PROCESSING  
 Line broadening 1.0 Hz  
 FT size 65536  
 Total time 58 min

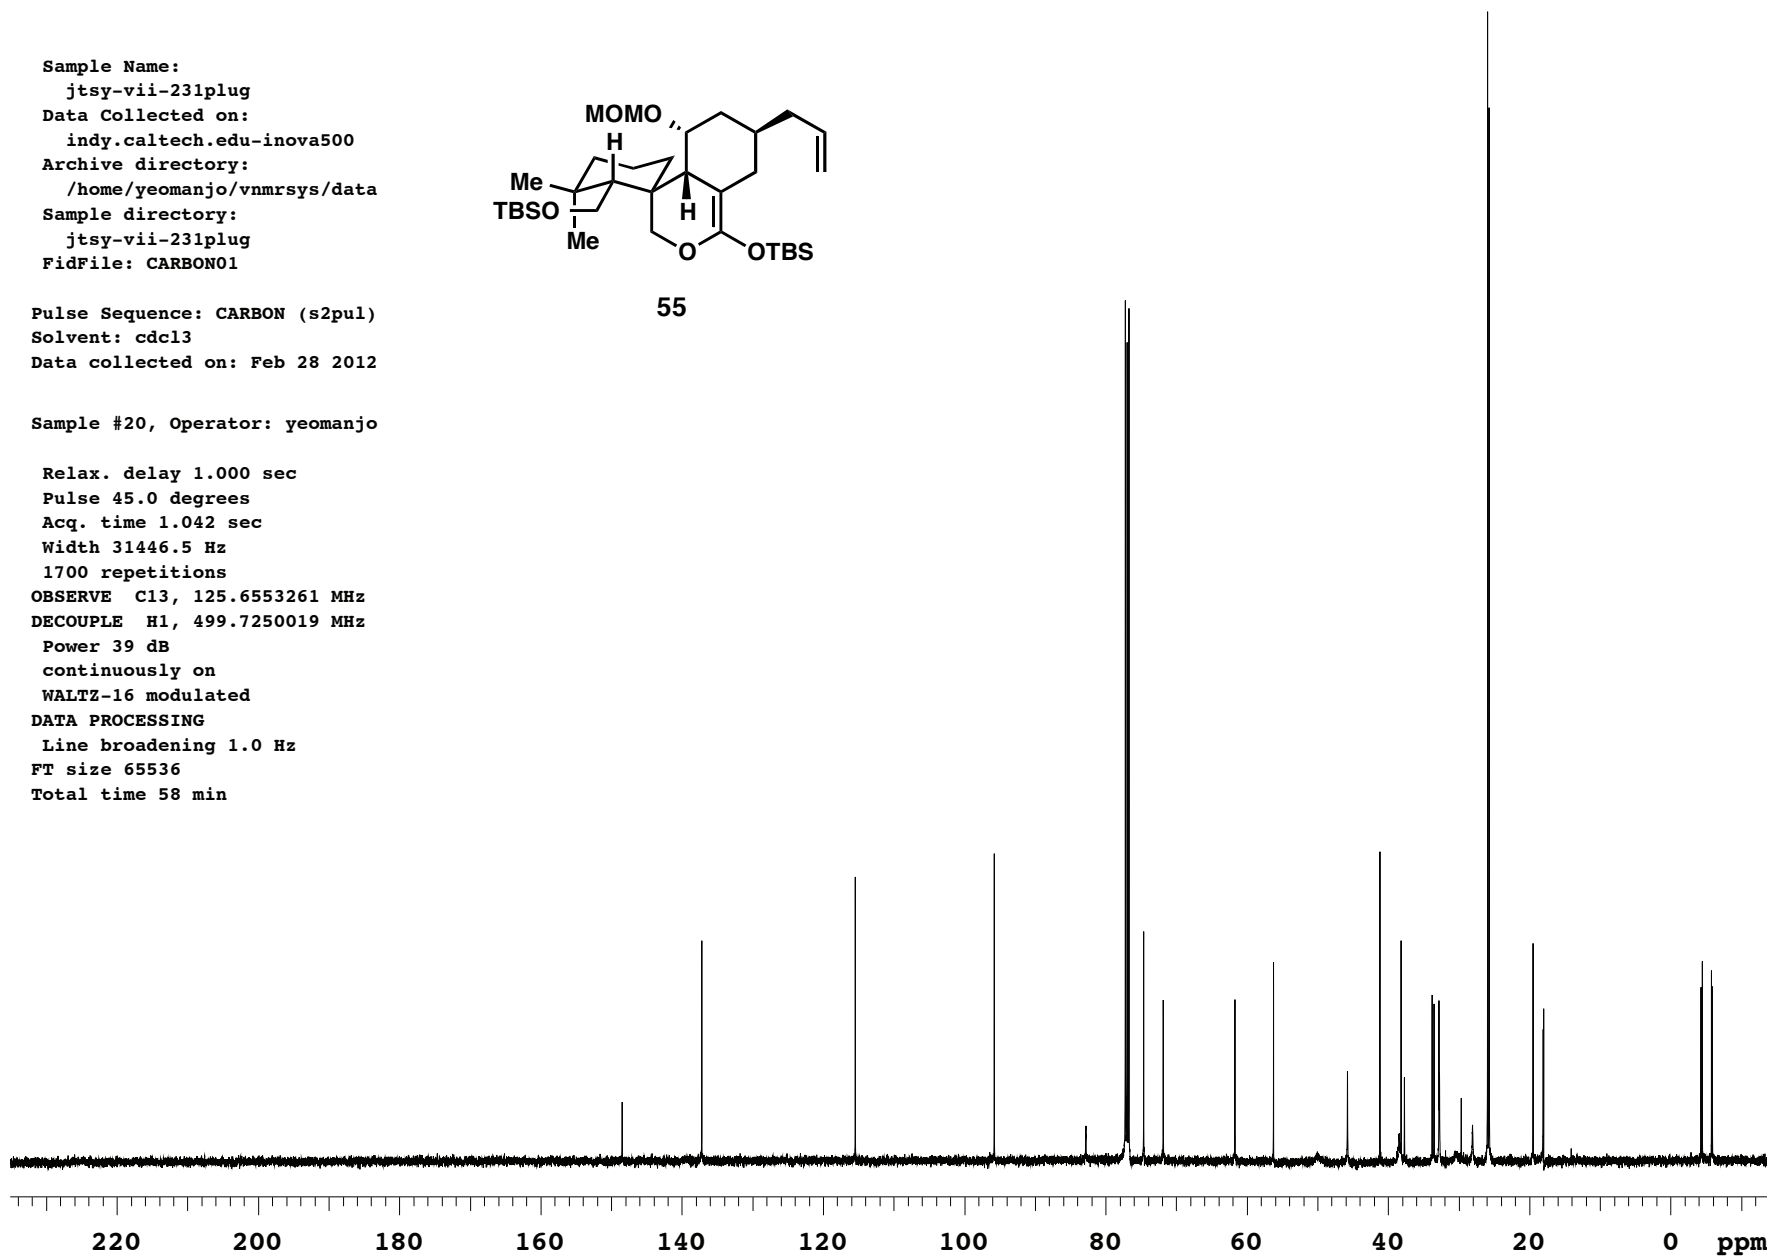

Sample Name:  
 jtsy-ix-081B-f23-39  
 Data Collected on:  
 indy.caltech.edu-inova500  
 Archive directory:  
 /home/yeomanjo/vnmrsys/data  
 Sample directory:  
 jtsy-ix-081B-f23-39  
 FidFile: PROTON01

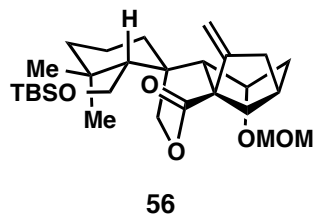

Pulse Sequence: PROTON (s2pul)  
 Solvent: cdcl3  
 Data collected on: Jan 23 2013

Sample #46, Operator: yeomanjo

Relax. delay 2.000 sec  
 Pulse 45.0 degrees  
 Acq. time 3.000 sec  
 Width 7995.2 Hz  
 8 repetitions  
 OBSERVE H1, 499.7049152 MHz  
 DATA PROCESSING  
 Line broadening 0.5 Hz  
 FT size 65536  
 Total time 0 min 40 sec

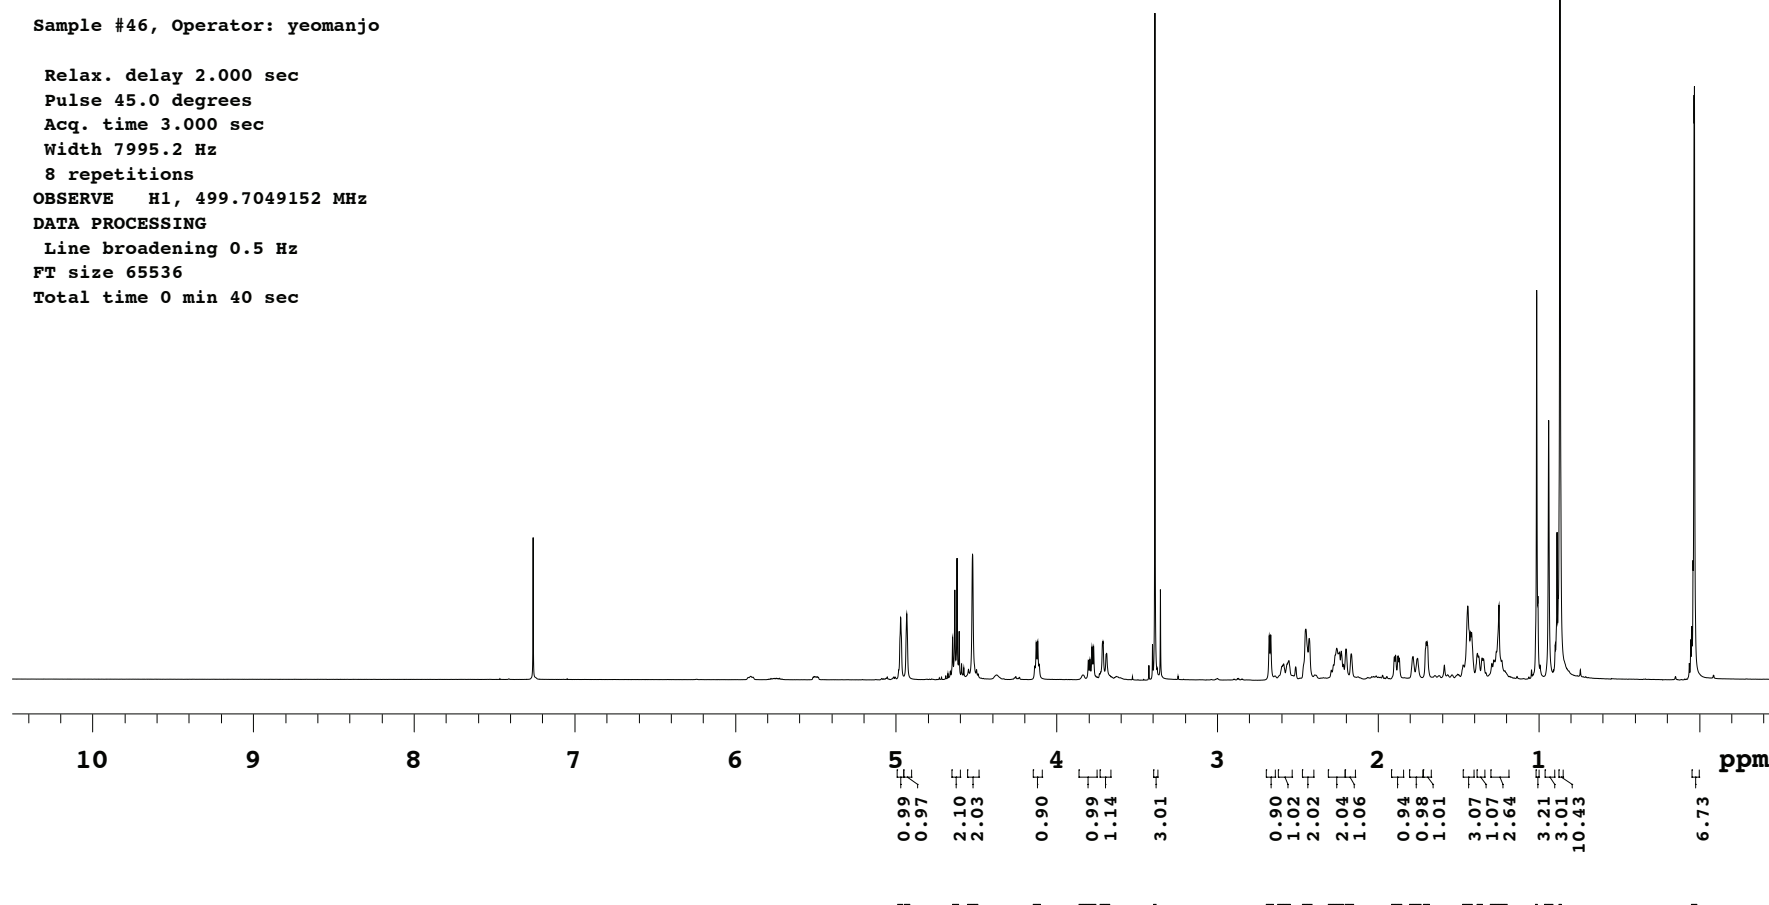

Sample Name:  
jtsy-vii-125  
Data Collected on:  
daytona.caltech.edu-inova500  
Archive directory:

Sample directory:

FidFile: jtsy-vii-125-c13

Pulse Sequence: CARBON (s2pul)  
Solvent: cdcl3  
Data collected on: Jan 12 2012

Temp. 25.0 C / 298.1 K  
Operator: yeomanjo

Relax. delay 0.100 sec  
Pulse 45.0 degrees  
Acq. time 1.043 sec  
Width 31421.8 Hz  
48000 repetitions  
OBSERVE C13, 125.6871022 MHz  
DECOUPLE H1, 499.8513810 MHz  
Power 39 dB  
continuously on  
WALTZ-16 modulated  
DATA PROCESSING  
Line broadening 2.0 Hz  
FT size 65536  
Total time 15 hr, 14 min

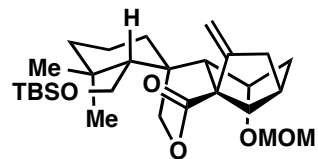

56

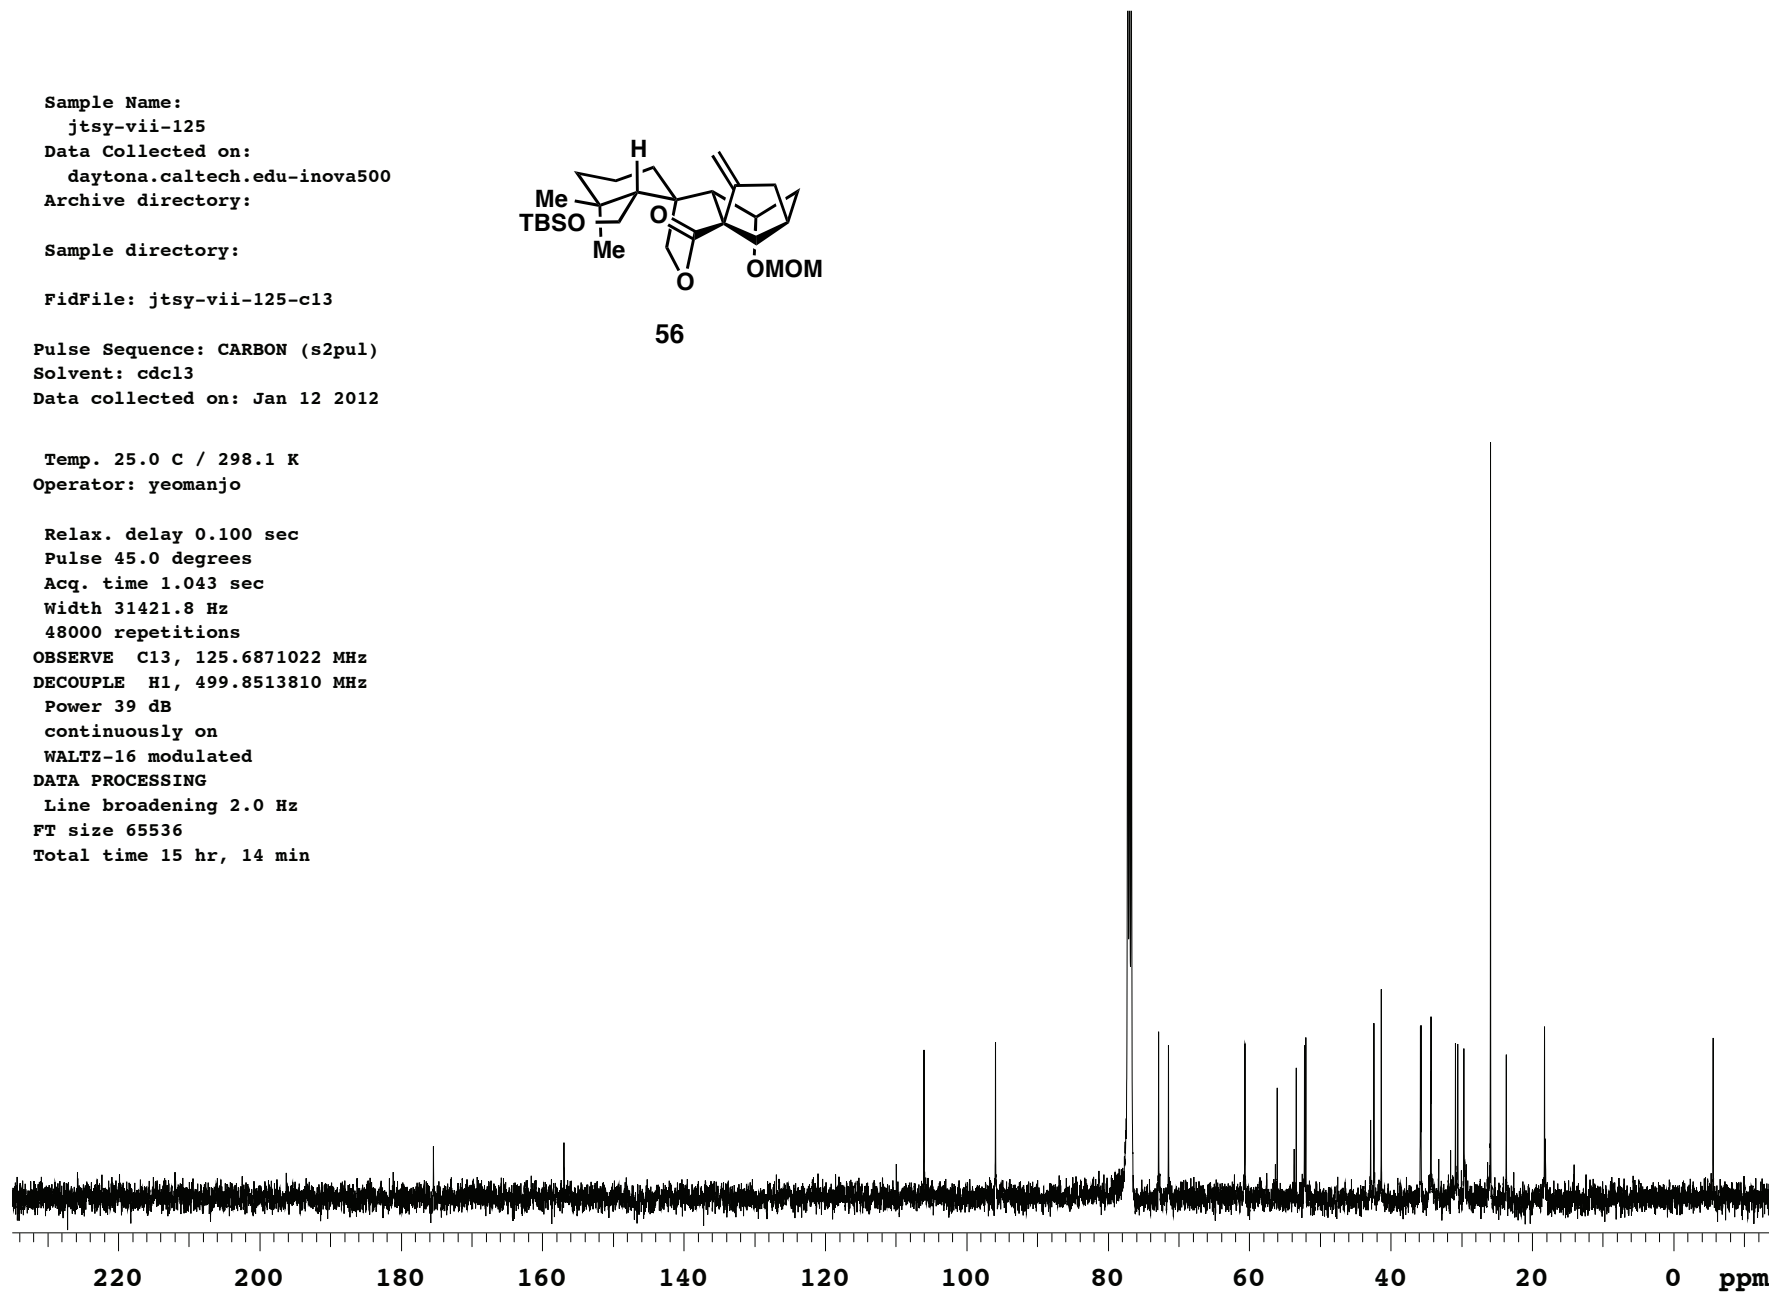





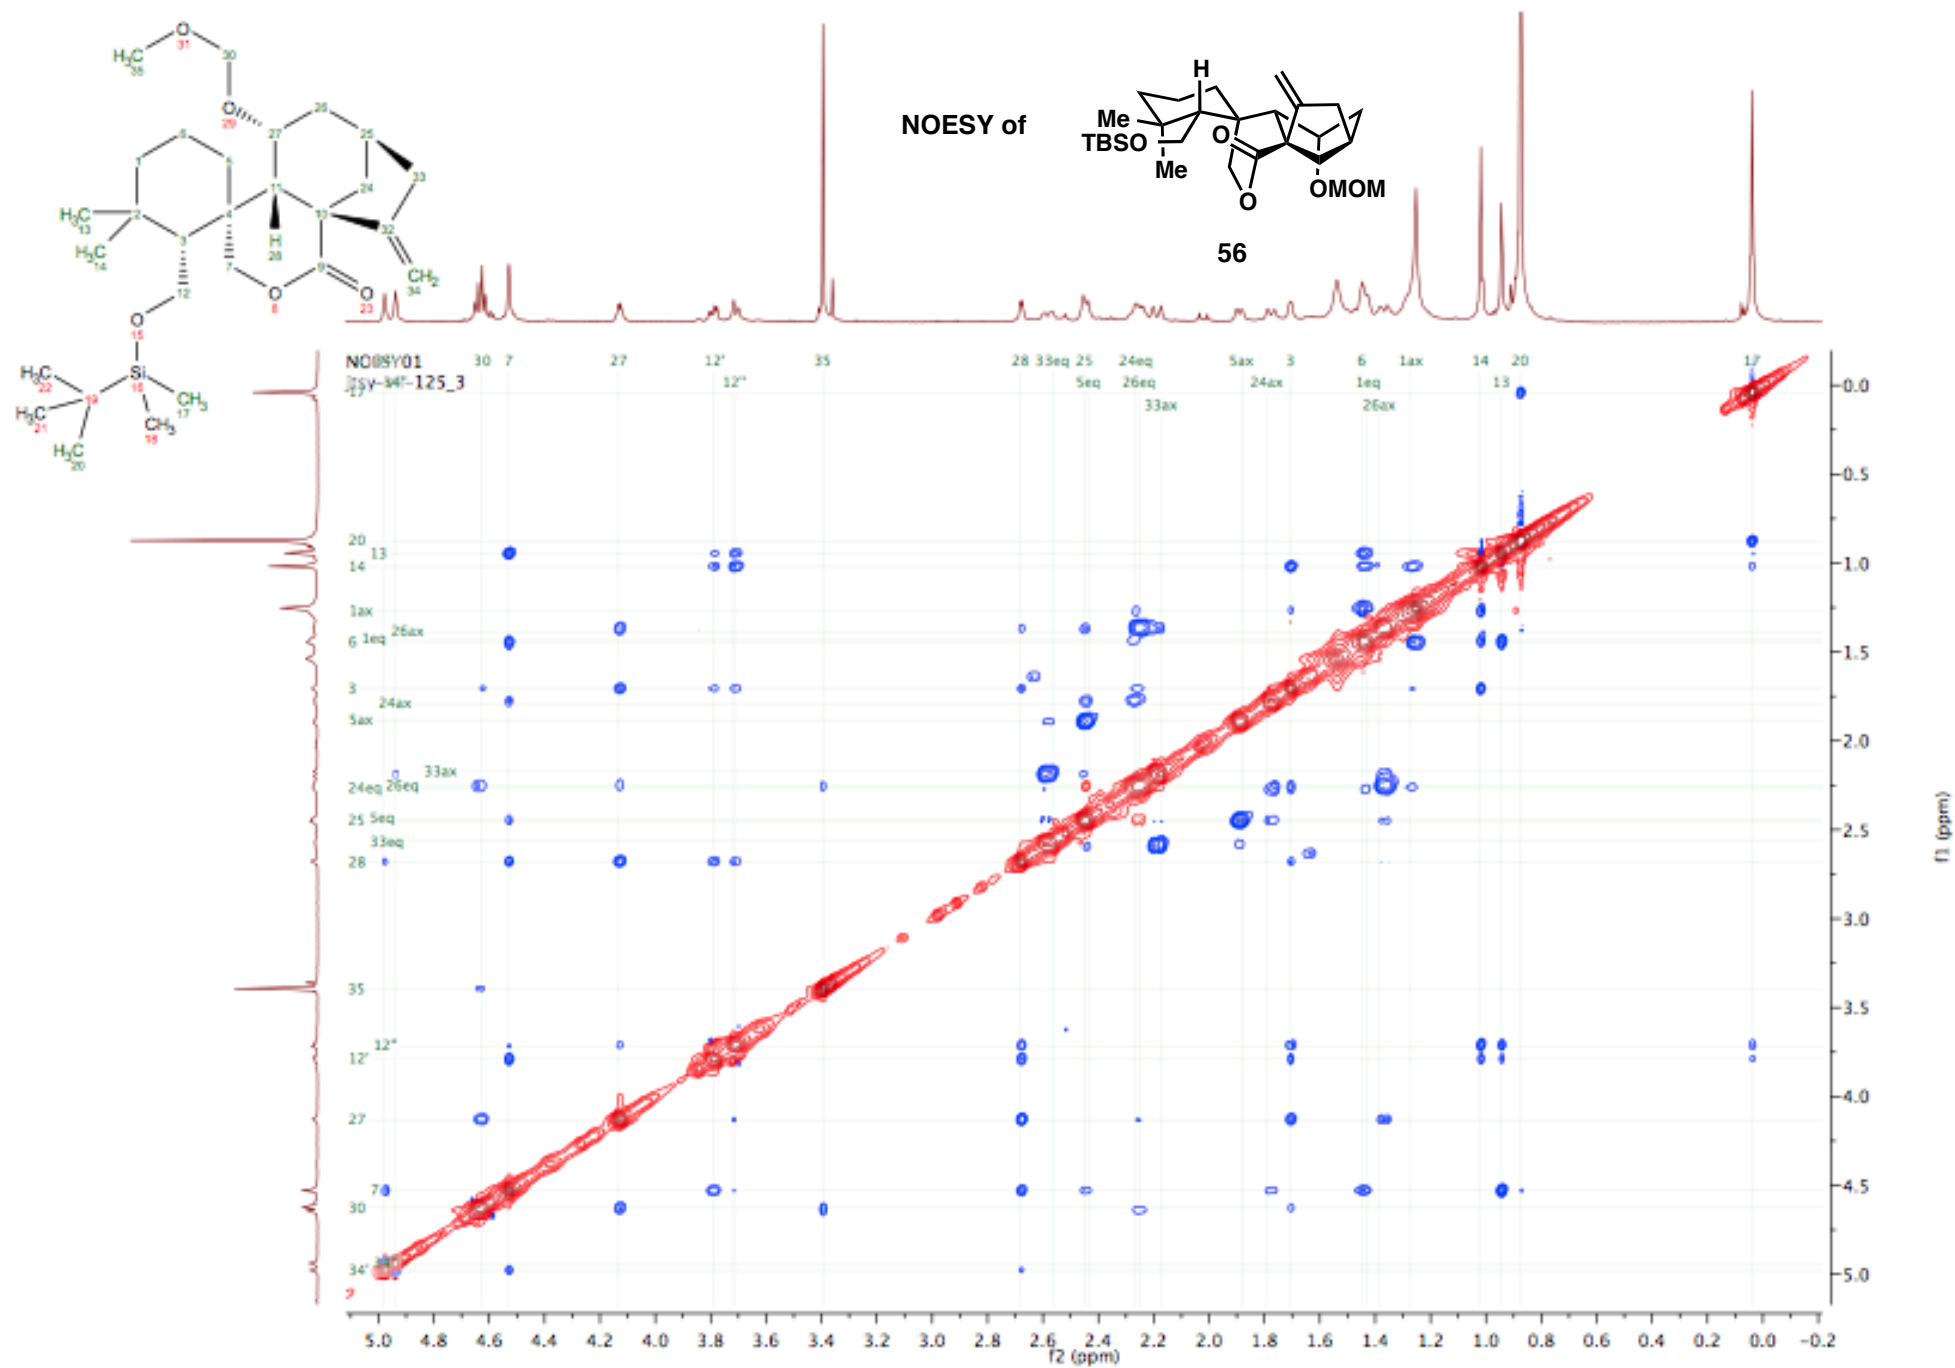

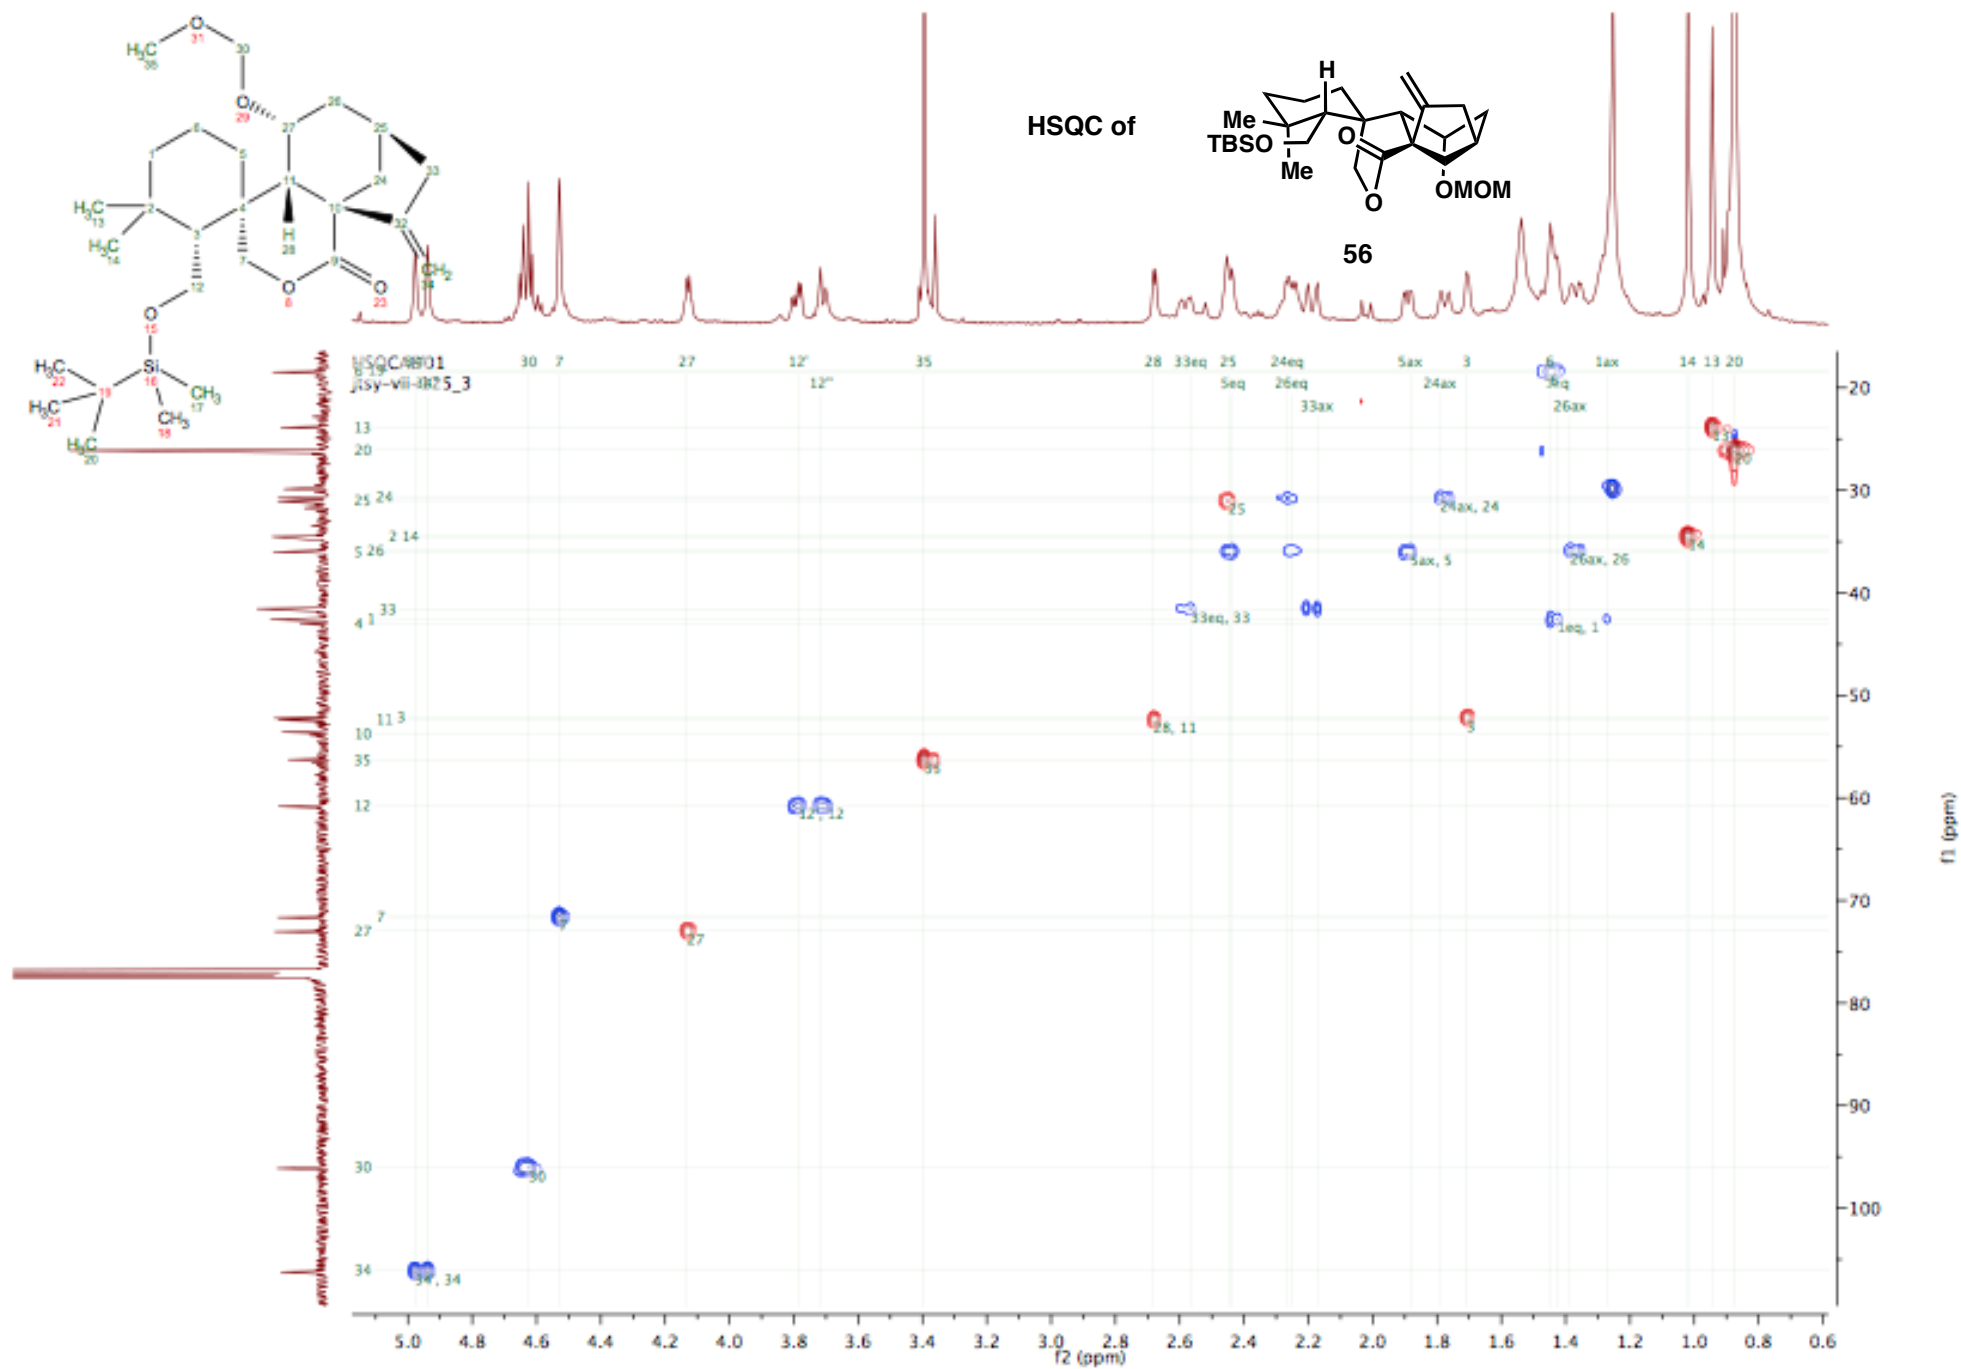

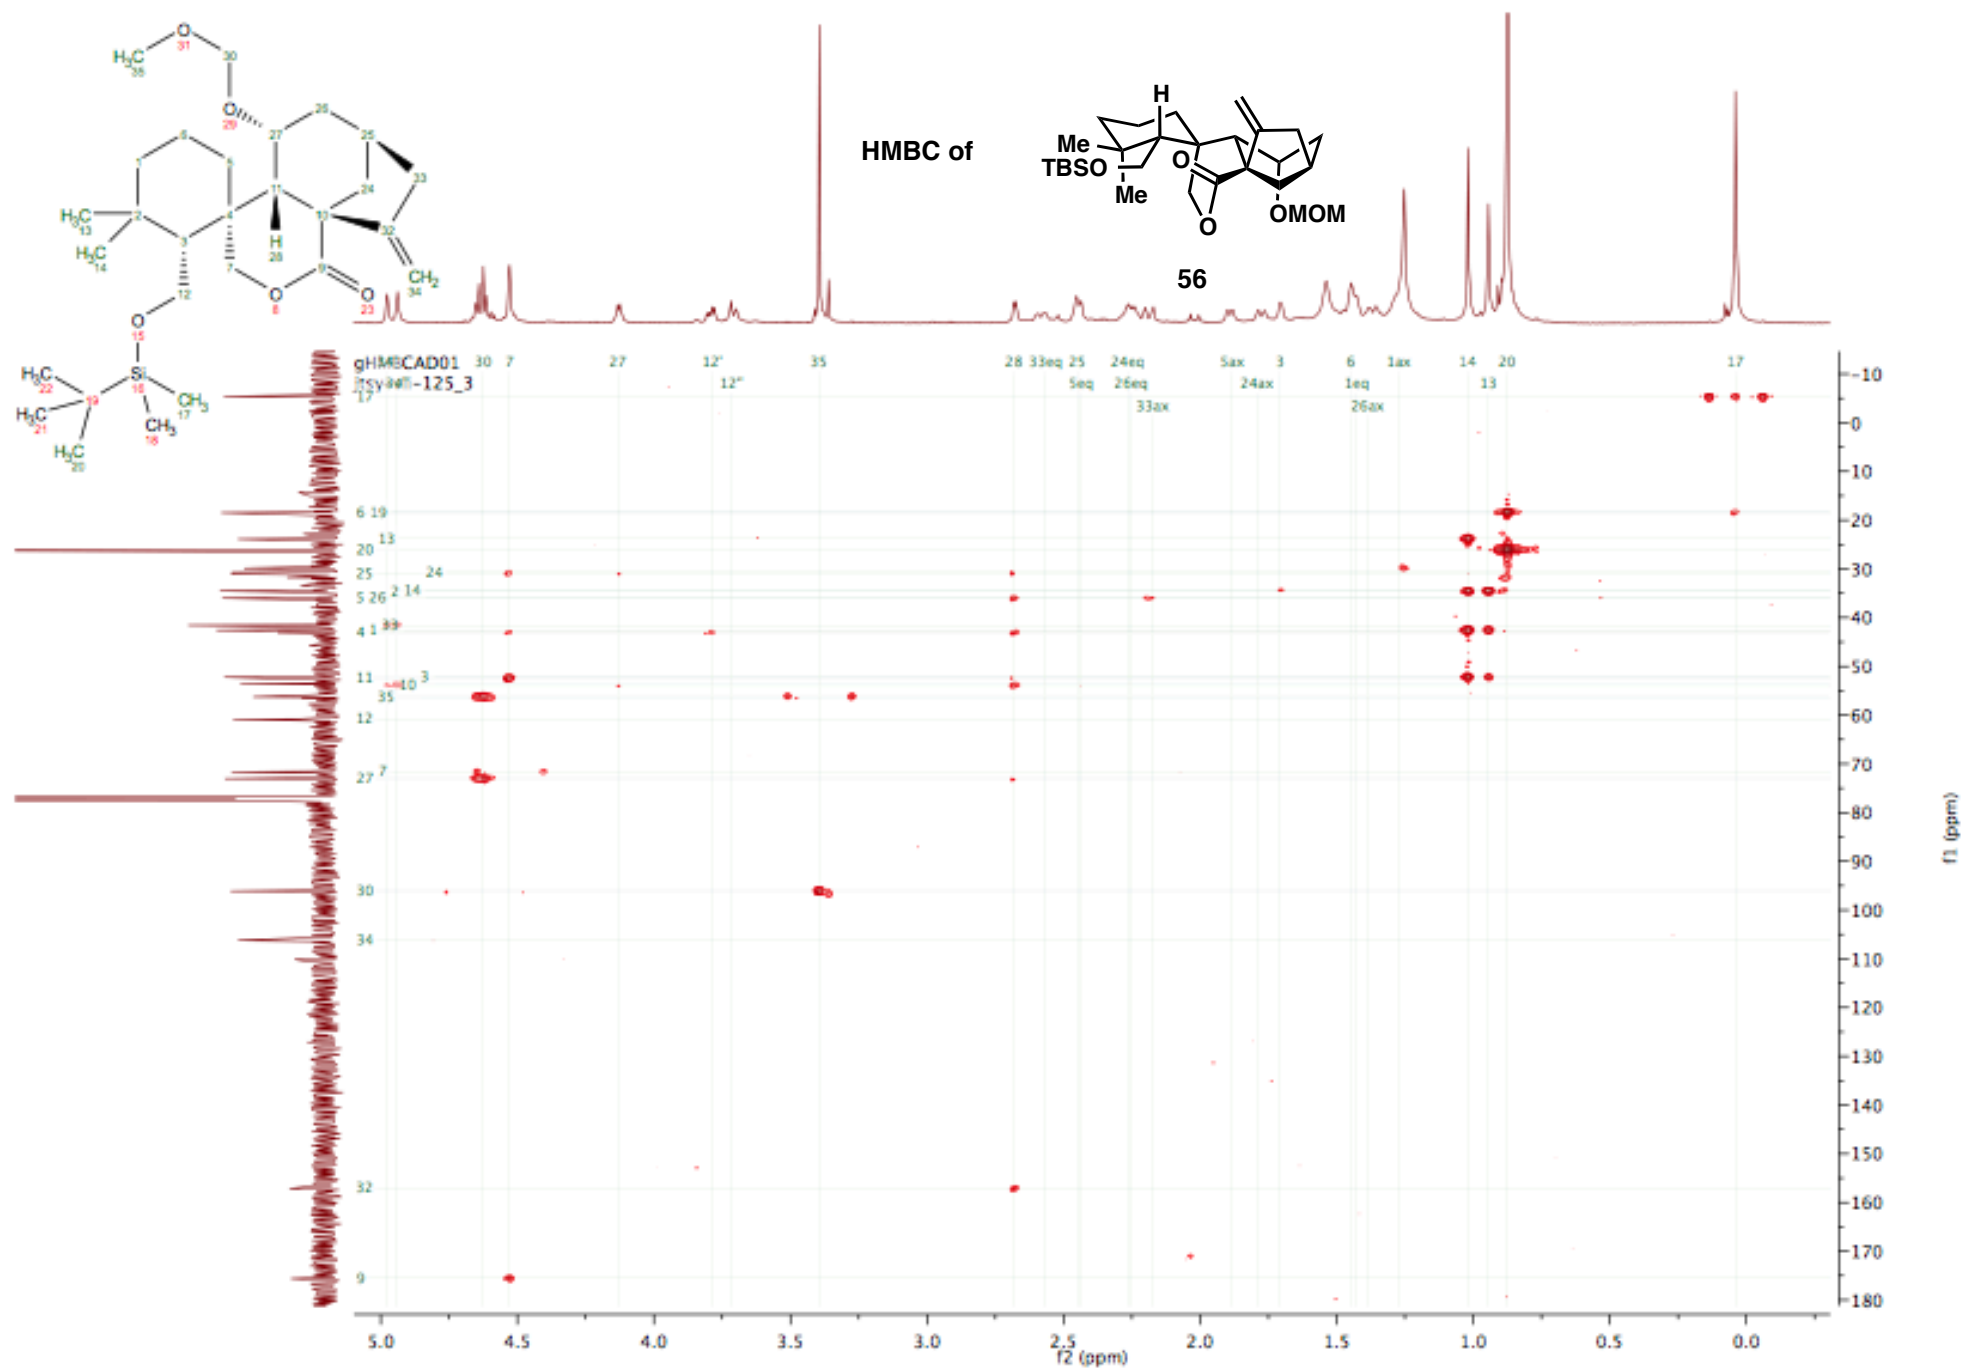

Sample Name:  
jtsy-ix-199f30-35  
Data Collected on:  
indy.caltech.edu-inova500  
Archive directory:  
/home/yeomanjo/vnmrsys/data  
Sample directory:  
jtsy-ix-199f30-35  
FidFile: PROTON01

Pulse Sequence: PROTON (s2pul)  
Solvent: cdcl3  
Data collected on: Jun 13 2013

Sample #46, Operator: yeomanjo

Relax. delay 10.000 sec  
Pulse 45.0 degrees  
Acq. time 3.000 sec  
Width 8000.0 Hz  
8 repetitions  
OBSERVE H1, 499.7049153 MHz  
DATA PROCESSING  
Line broadening 0.2 Hz  
FT size 65536  
Total time 1 min 44 sec

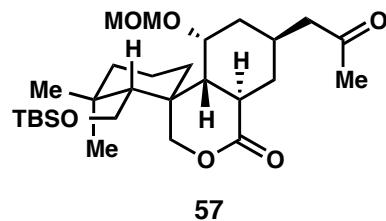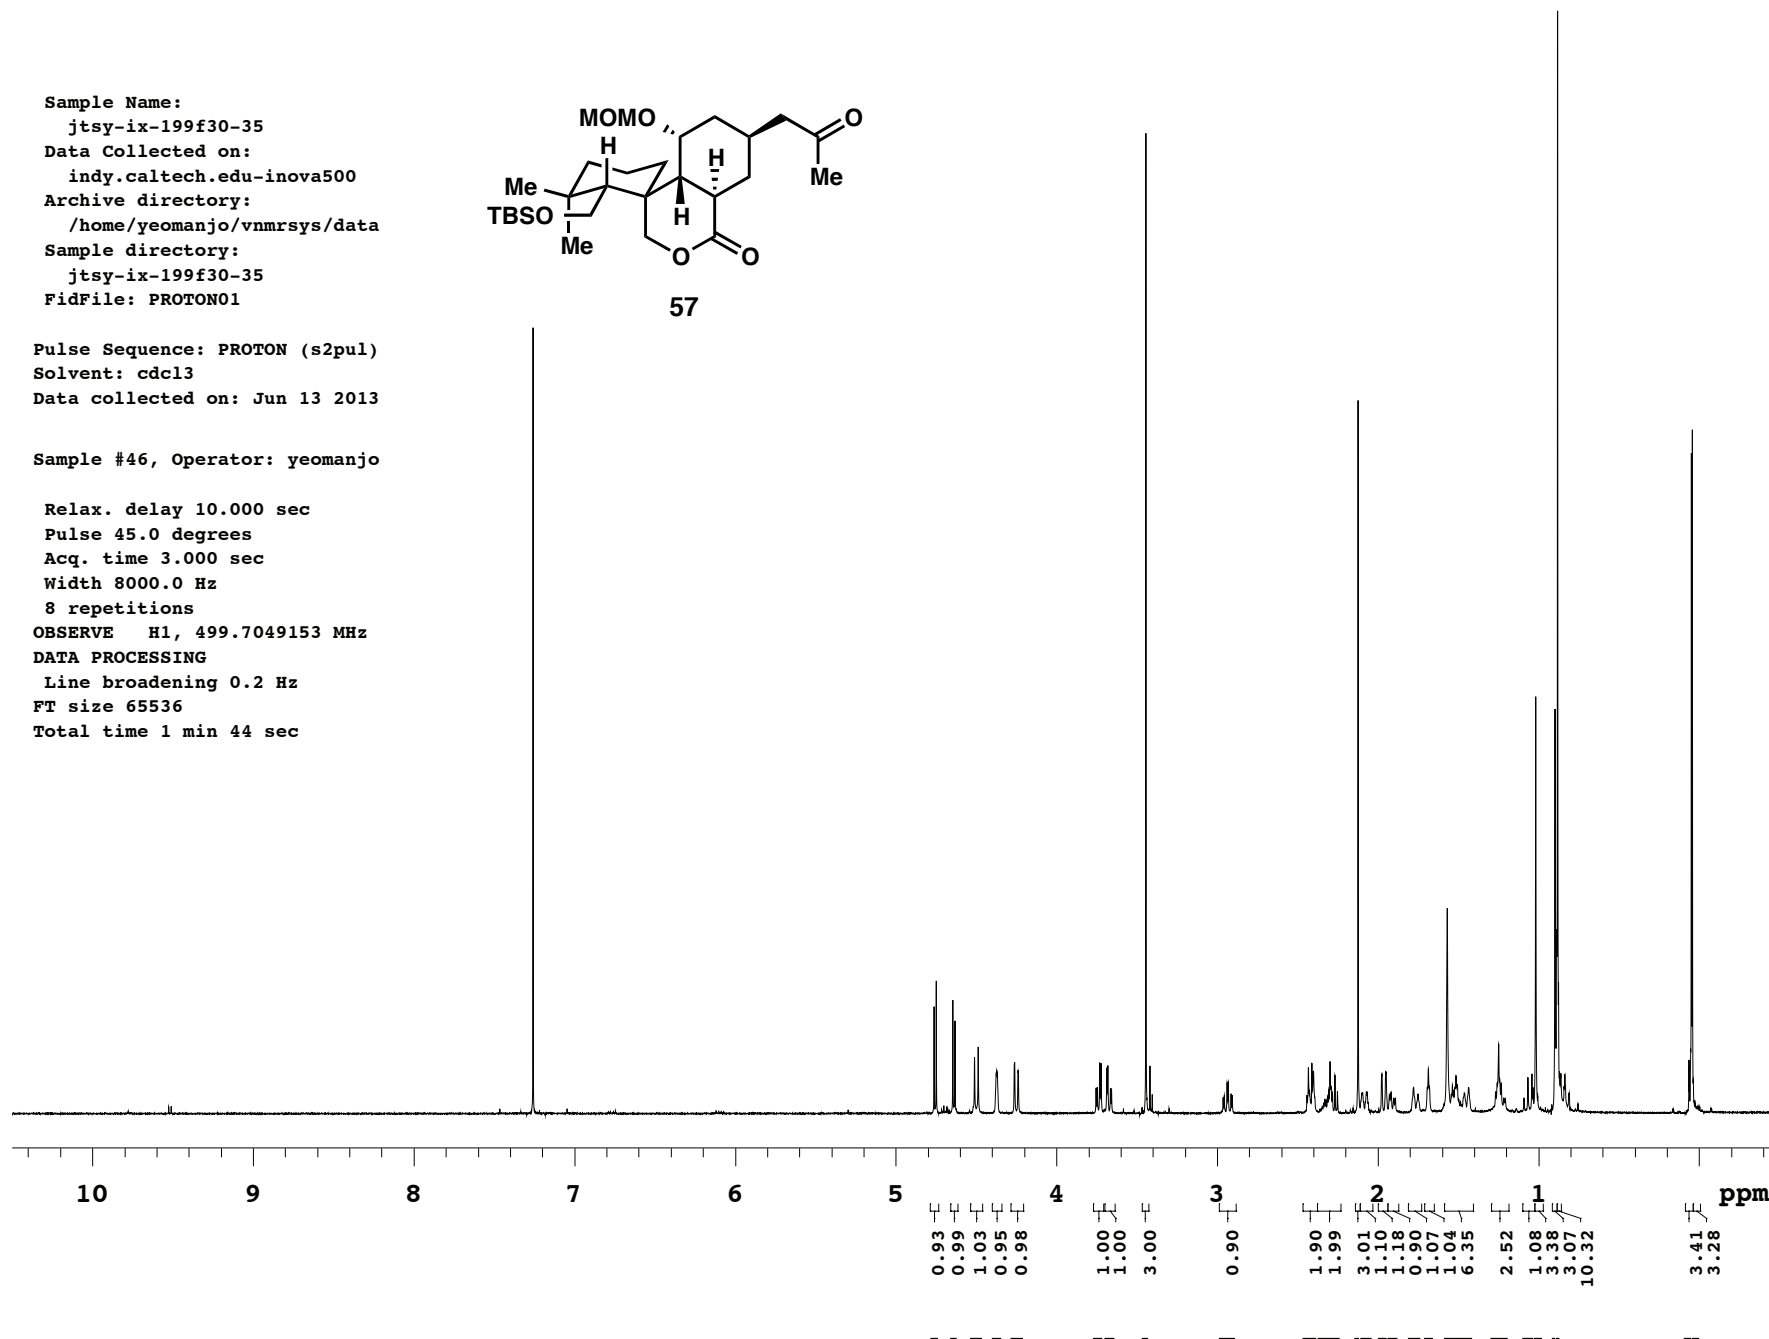

Sample Name:  
jtsy-ix-199f30-35  
Data Collected on:  
indy.caltech.edu-inova500  
Archive directory:  
/home/yeomanjo/vnmrsys/data  
Sample directory:  
jtsy-ix-199f30-35  
FidFile: CARBON01

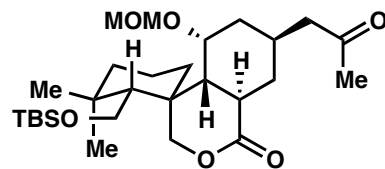

Pulse Sequence: CARBON (s2pul)  
Solvent: cdcl3  
Data collected on: Jun 13 2013

Sample #46, Operator: yeomanjo

Relax. delay 0.100 sec  
Pulse 45.0 degrees  
Acq. time 1.042 sec  
Width 31446.5 Hz  
3000 repetitions  
OBSERVE C13, 125.6509014 MHz  
DECOUPLE H1, 499.7074131 MHz  
Power 40 dB  
continuously on  
WALTZ-16 modulated  
DATA PROCESSING  
Line broadening 2.0 Hz  
FT size 65536  
Total time 57 min

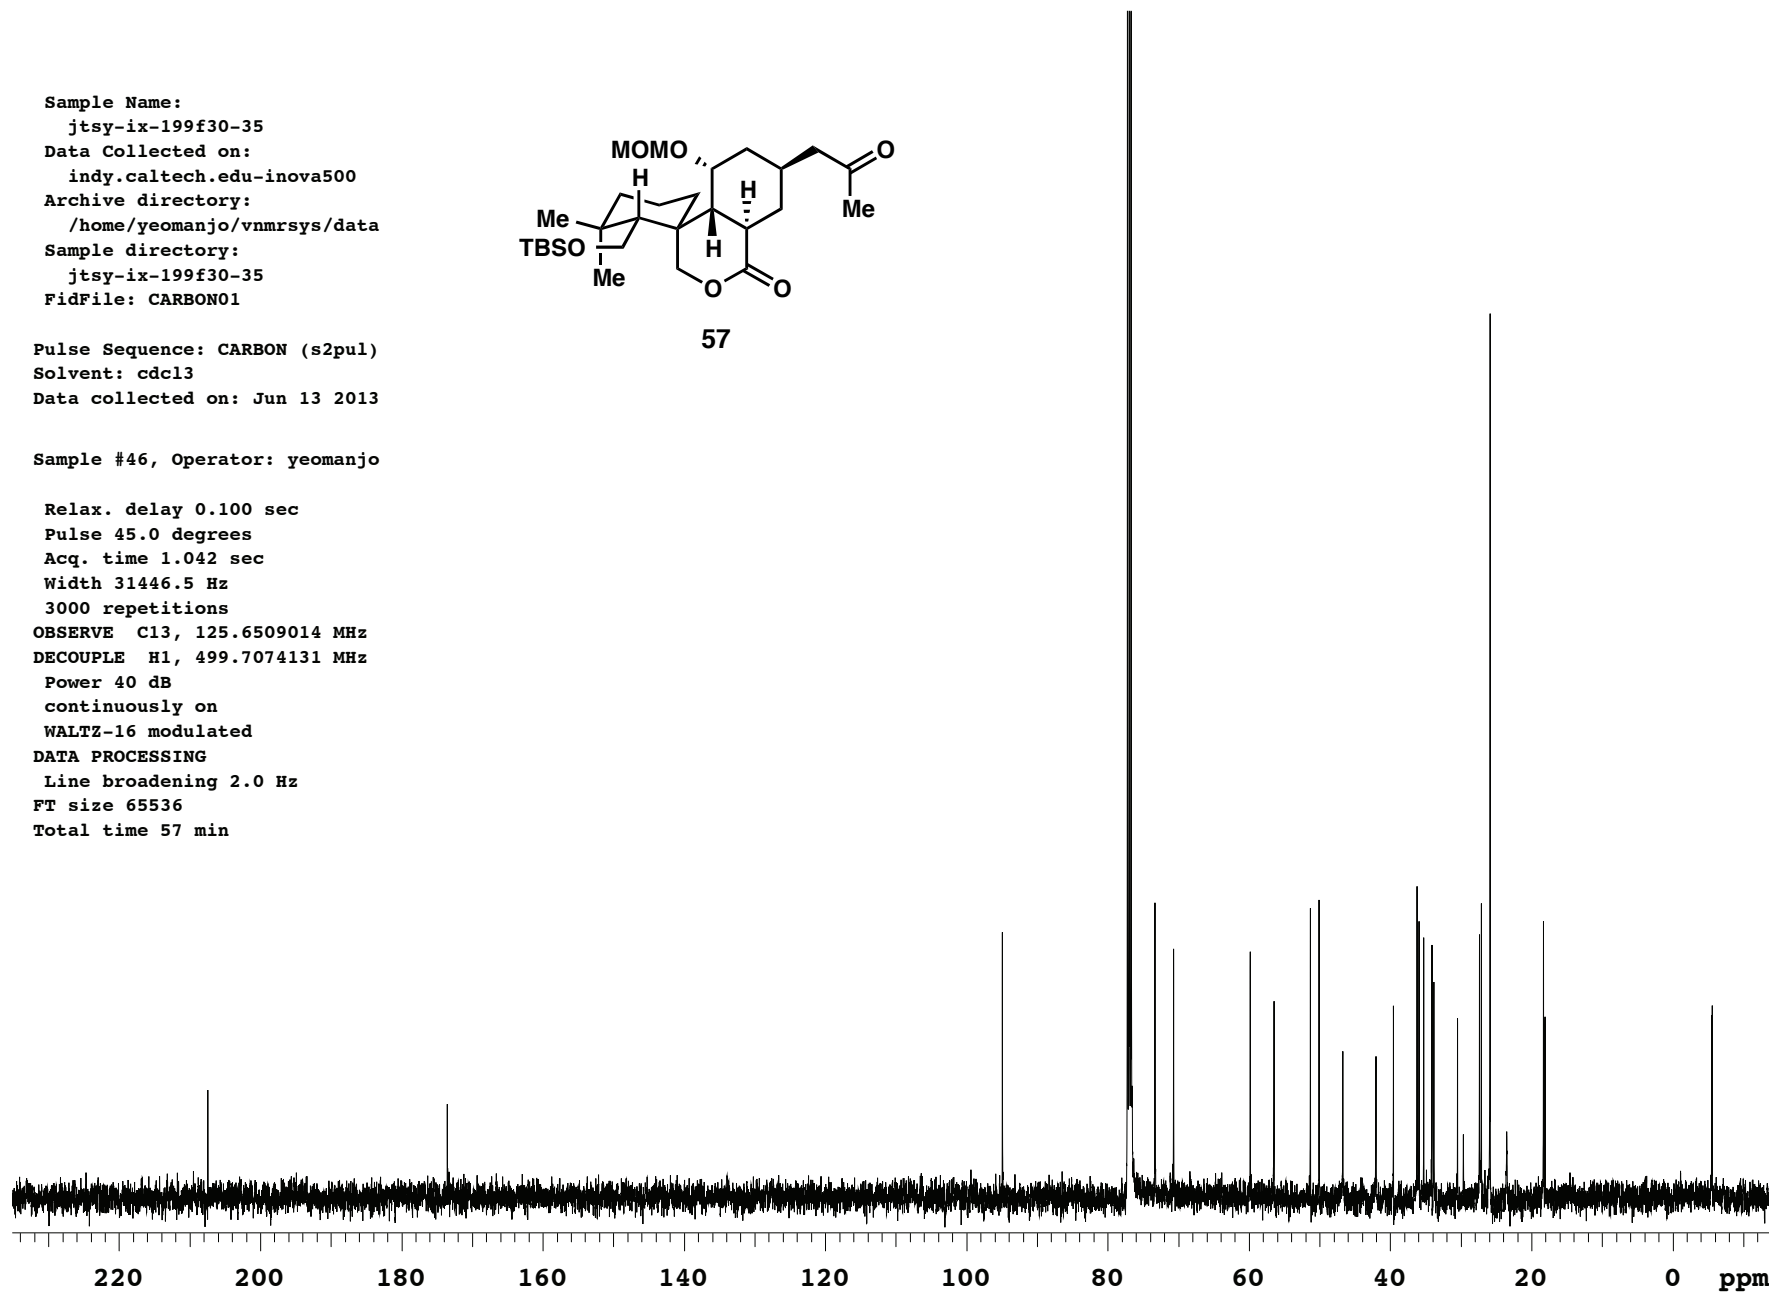

Sample Name:  
 jtsy-ix-133Bf15-23  
 Data Collected on:  
 indy.caltech.edu-inova500  
 Archive directory:  
 /home/yeomanjo/vnmrsys/data  
 Sample directory:  
 jtsy-ix-133Bf15-23  
 FidFile: PROTON01

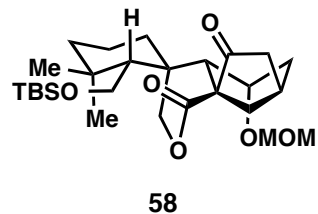

Pulse Sequence: PROTON (s2pul)  
 Solvent: cdcl3  
 Data collected on: Mar 5 2013

Sample #32, Operator: yeomanjo

Relax. delay 10.000 sec  
 Pulse 45.0 degrees  
 Acq. time 3.000 sec  
 Width 8000.0 Hz  
 8 repetitions  
 OBSERVE H1, 499.7049151 MHz  
 DATA PROCESSING  
 Line broadening 0.2 Hz  
 FT size 65536  
 Total time 1 min 44 sec

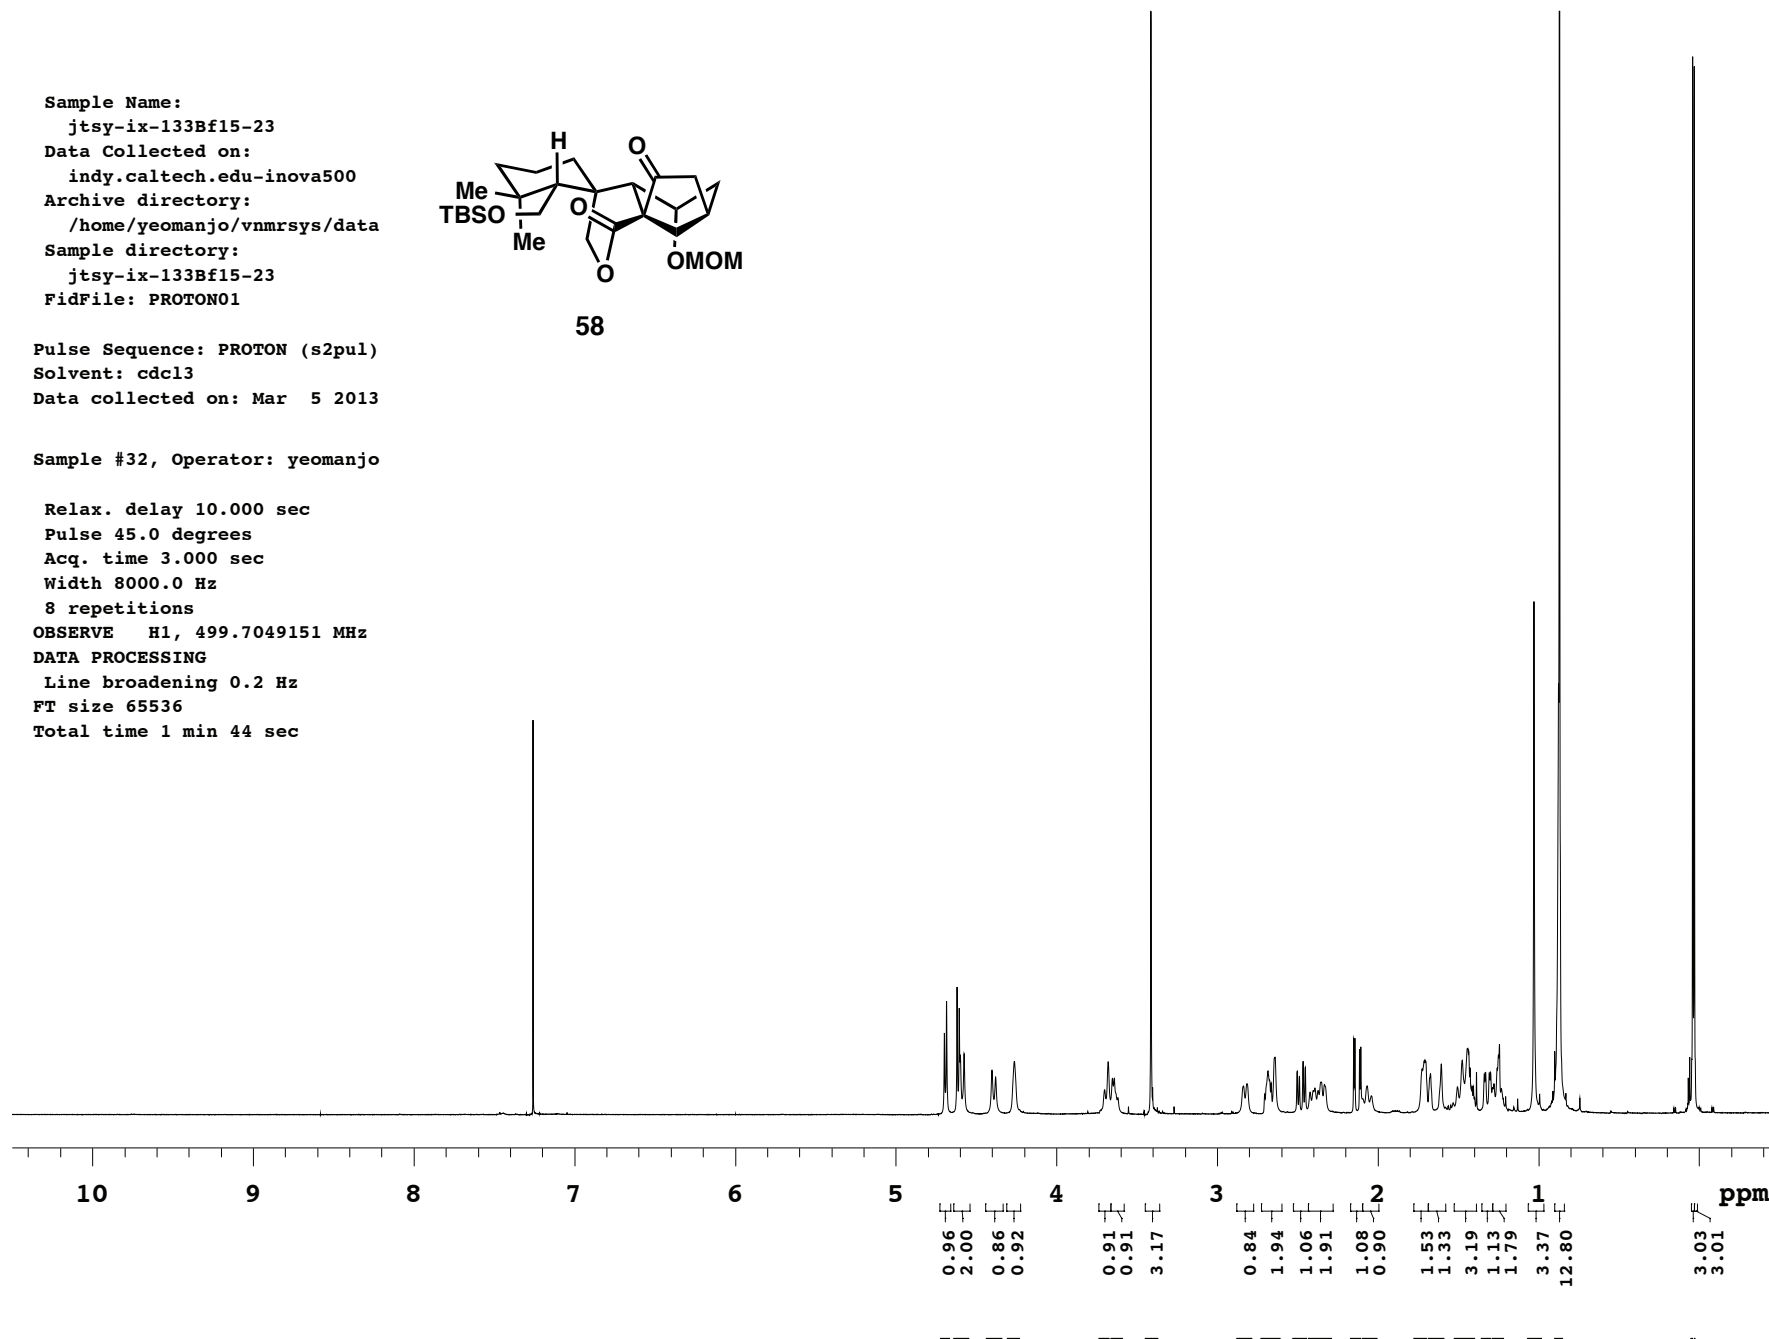

Sample Name:  
 jtsy-ix-133Bf15-23  
 Data Collected on:  
 indy.caltech.edu-inova500  
 Archive directory:  
 /home/yeomanjo/vnmrsys/data  
 Sample directory:  
 jtsy-ix-133Bf15-23  
 FidFile: CARBON01

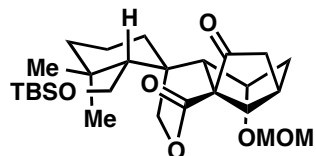

58

Pulse Sequence: CARBON (s2pul)  
 Solvent: cdcl3  
 Data collected on: Mar 5 2013

Sample #32, Operator: yeomanjo

Relax. delay 1.000 sec  
 Pulse 45.0 degrees  
 Acq. time 1.042 sec  
 Width 31446.5 Hz  
 1000 repetitions  
 OBSERVE C13, 125.6509033 MHz  
 DECOUPLE H1, 499.7074131 MHz  
 Power 39 dB  
 continuously on  
 WALTZ-16 modulated  
 DATA PROCESSING  
 Line broadening 1.0 Hz  
 FT size 65536  
 Total time 34 min

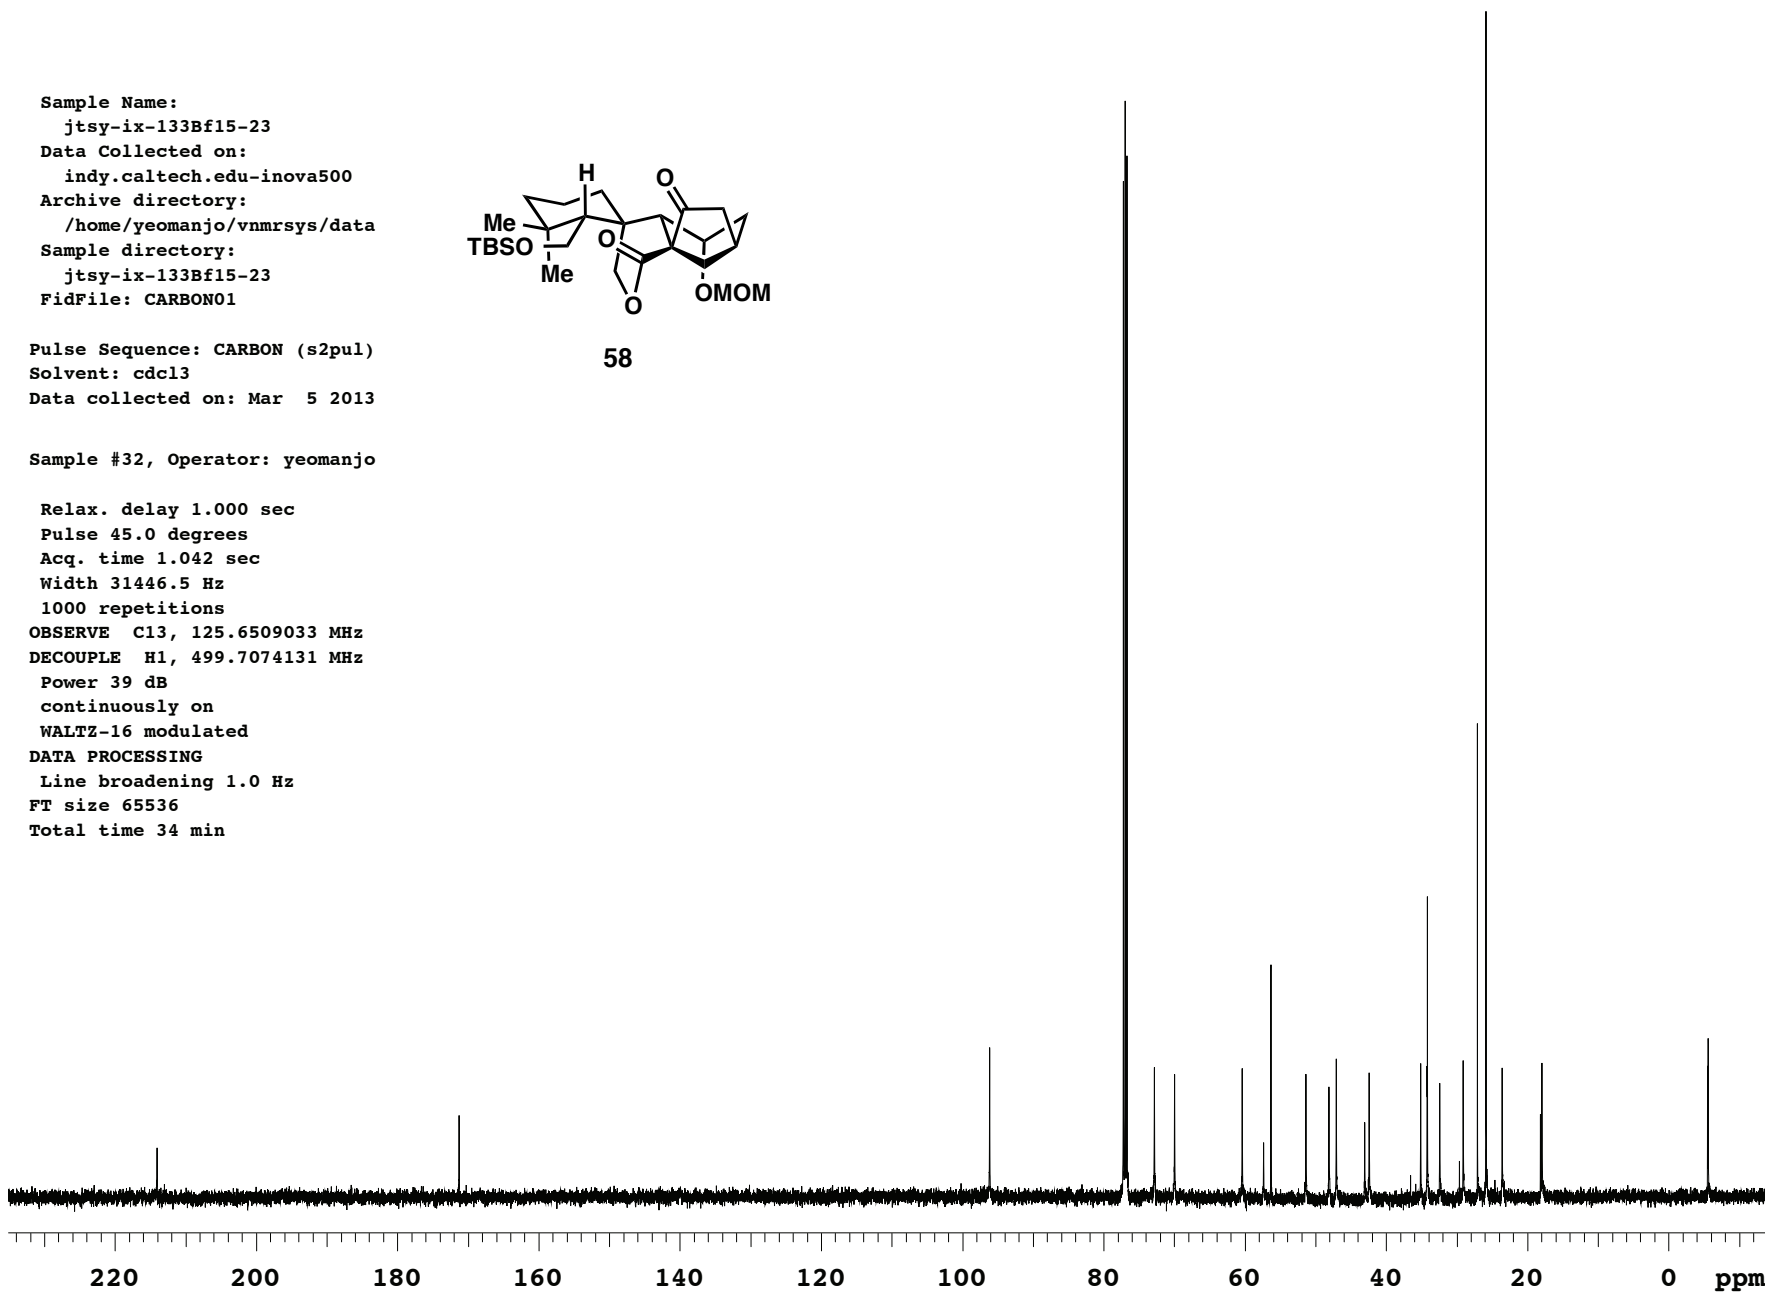

Sample Name:  
jtsy-ix-107  
Data Collected on:  
indy.caltech.edu-inova500  
Archive directory:  
/home/yeomanjo/vnmrsys/data  
Sample directory:  
jtsy-ix-107  
FidFile: PROTON01

Pulse Sequence: PROTON (s2pul)  
Solvent: cdcl3  
Data collected on: Feb 13 2013

Sample #39, Operator: yeomanjo

Relax. delay 10.000 sec  
Pulse 45.0 degrees  
Acq. time 3.000 sec  
Width 8000.0 Hz  
8 repetitions  
OBSERVE H1, 499.7049151 MHz  
DATA PROCESSING  
Line broadening 0.2 Hz  
FT size 65536  
Total time 1 min 44 sec

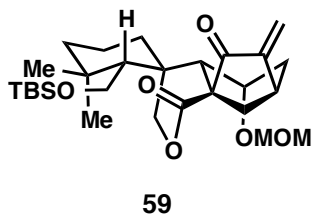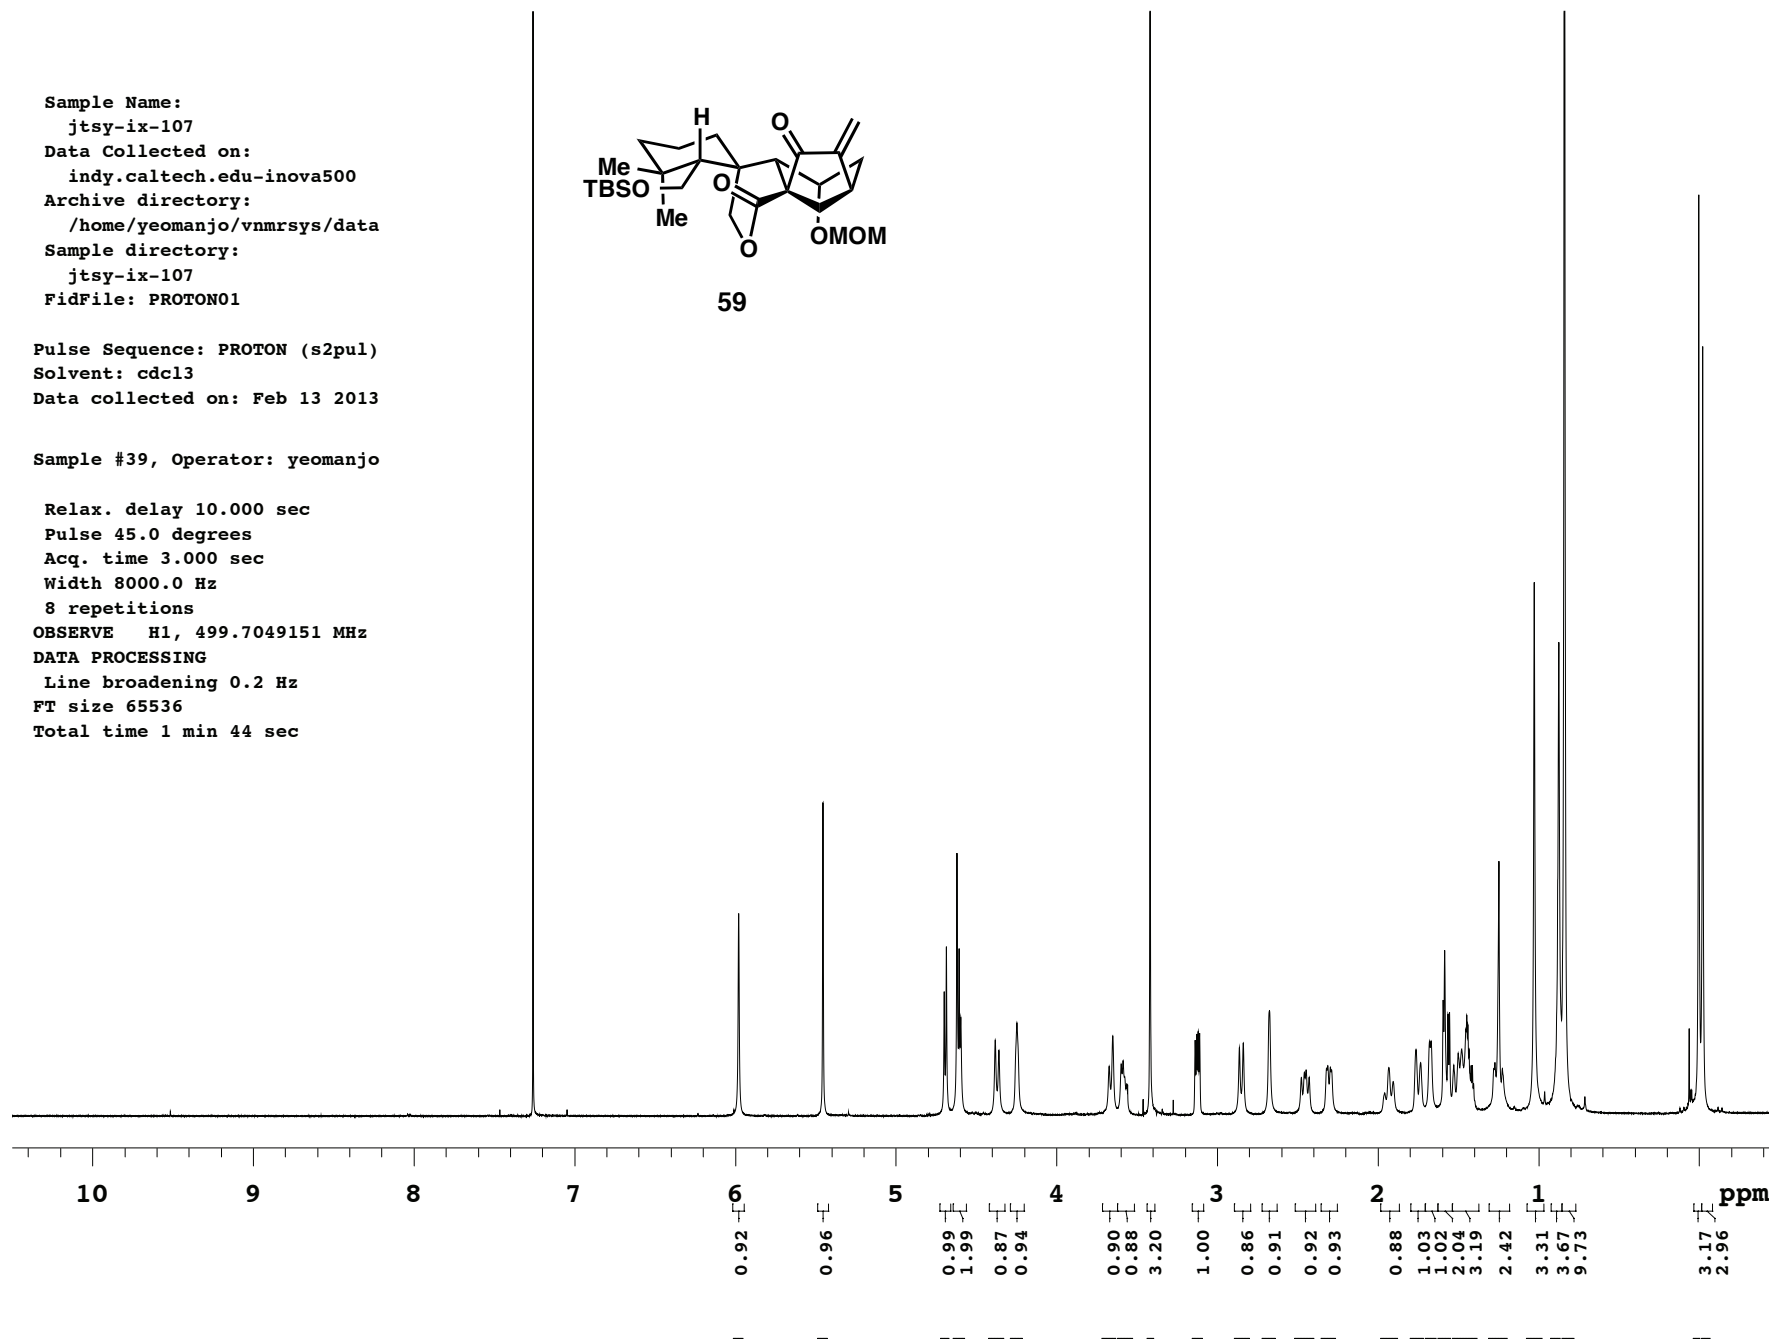



Sample Name:  
jtsy-ix-107  
Data Collected on:  
indy.caltech.edu-inova500  
Archive directory:  
/home/yeomanjo/vnmrsys/data  
Sample directory:  
jtsy-ix-107  
FidFile: CARBON01

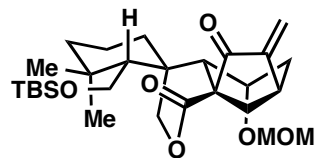

59

Pulse Sequence: CARBON (s2pul)  
Solvent: cdcl3  
Data collected on: Feb 13 2013

Sample #39, Operator: yeomanjo

Relax. delay 1.000 sec  
Pulse 45.0 degrees  
Acq. time 1.042 sec  
Width 31446.5 Hz  
1000 repetitions  
OBSERVE C13, 125.6509014 MHz  
DECOUPLE H1, 499.7074131 MHz  
Power 39 dB  
continuously on  
WALTZ-16 modulated  
DATA PROCESSING  
Line broadening 1.0 Hz  
FT size 65536  
Total time 34 min

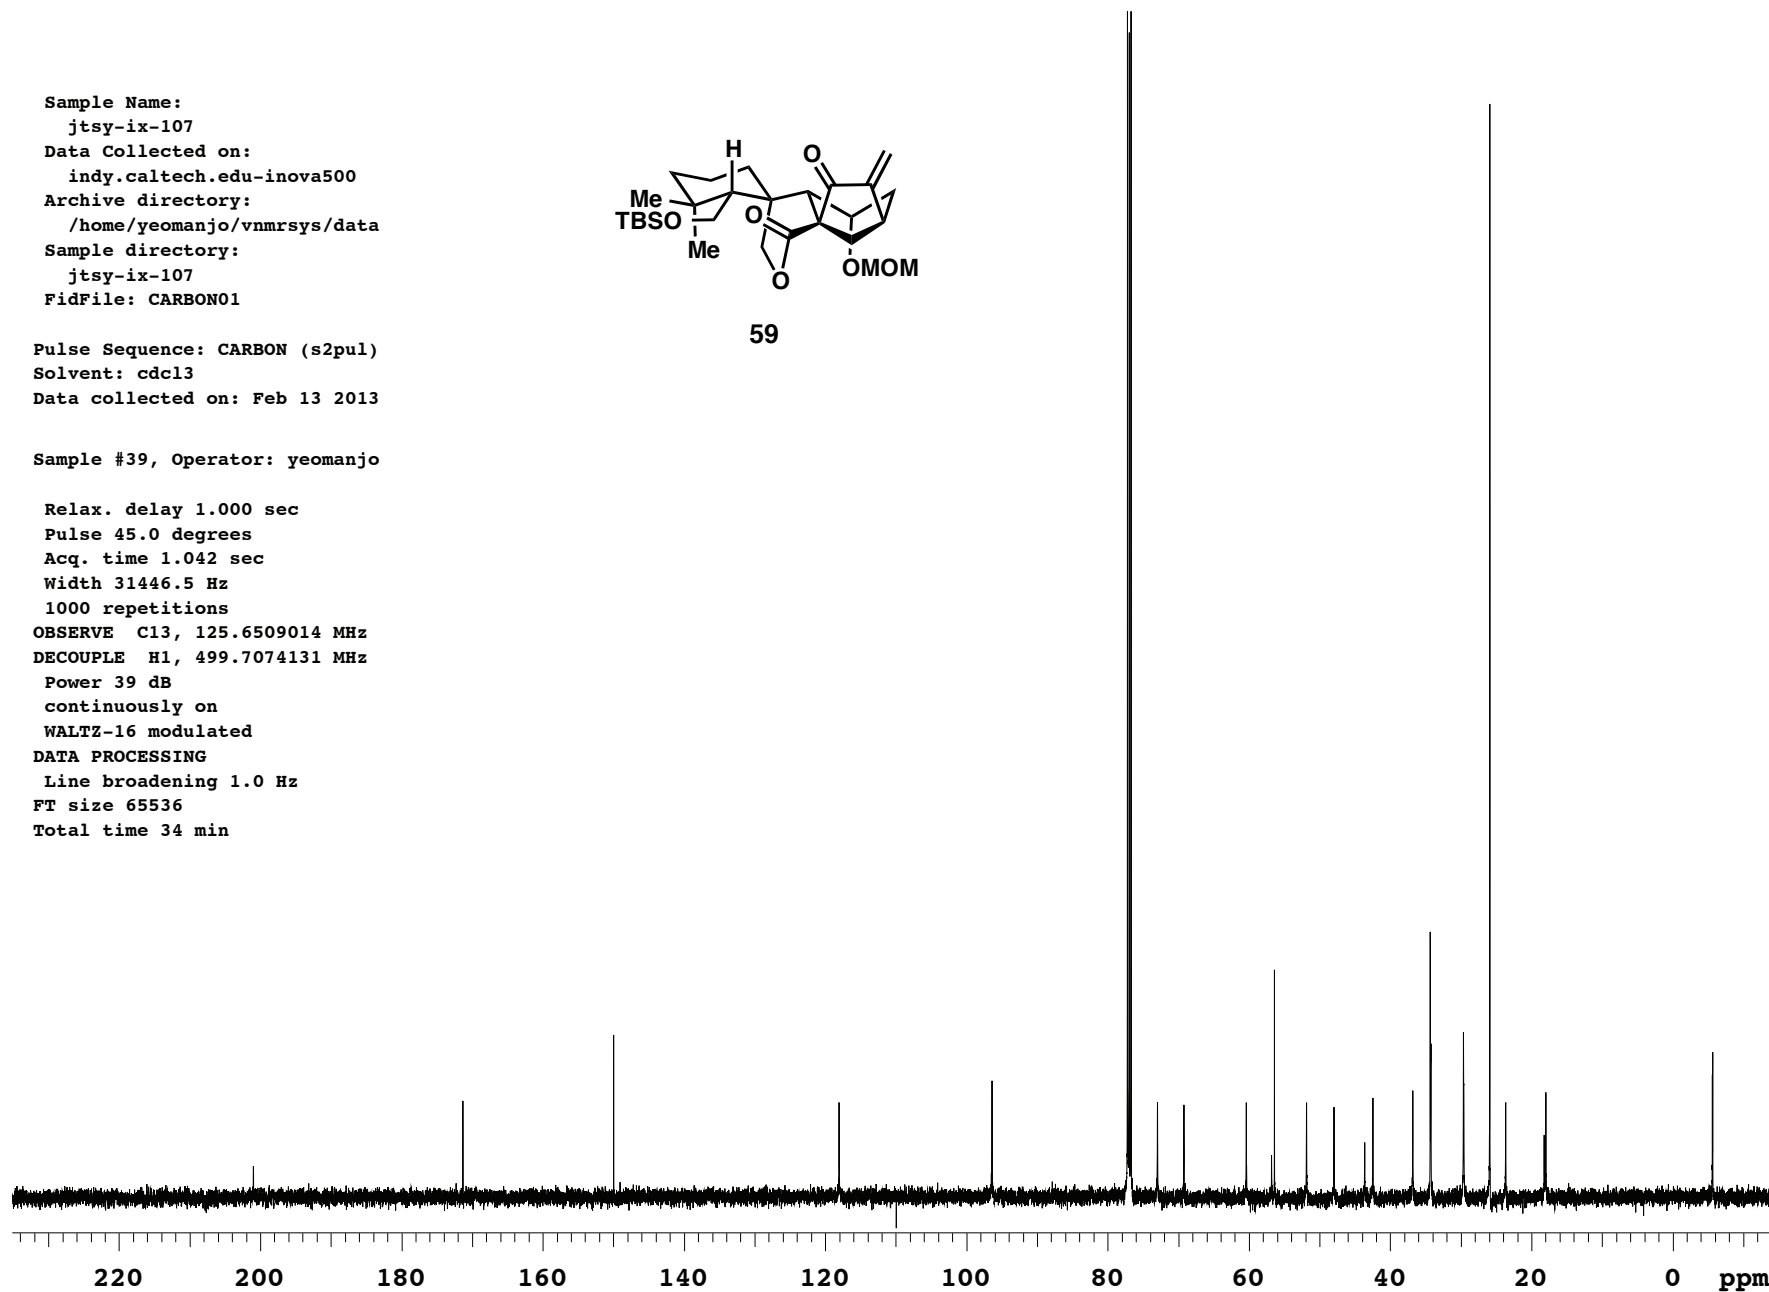

Sample Name:  
 jtsy-ix-115f16-35  
 Data Collected on:  
 indy.caltech.edu-inova500  
 Archive directory:  
 /home/yeomanjo/vnmrsys/data  
 Sample directory:  
 jtsy-ix-115f16-35  
 FidFile: PROTON01

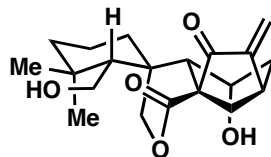

SI-5

Pulse Sequence: PROTON (s2pul)  
 Solvent: cdcl3  
 Data collected on: Feb 15 2013

Sample #39, Operator: yeomanjo

Relax. delay 10.000 sec  
 Pulse 45.0 degrees  
 Acq. time 3.000 sec  
 Width 8000.0 Hz  
 8 repetitions  
 OBSERVE H1, 499.7049151 MHz  
 DATA PROCESSING  
 Line broadening 0.2 Hz  
 FT size 65536  
 Total time 1 min 44 sec

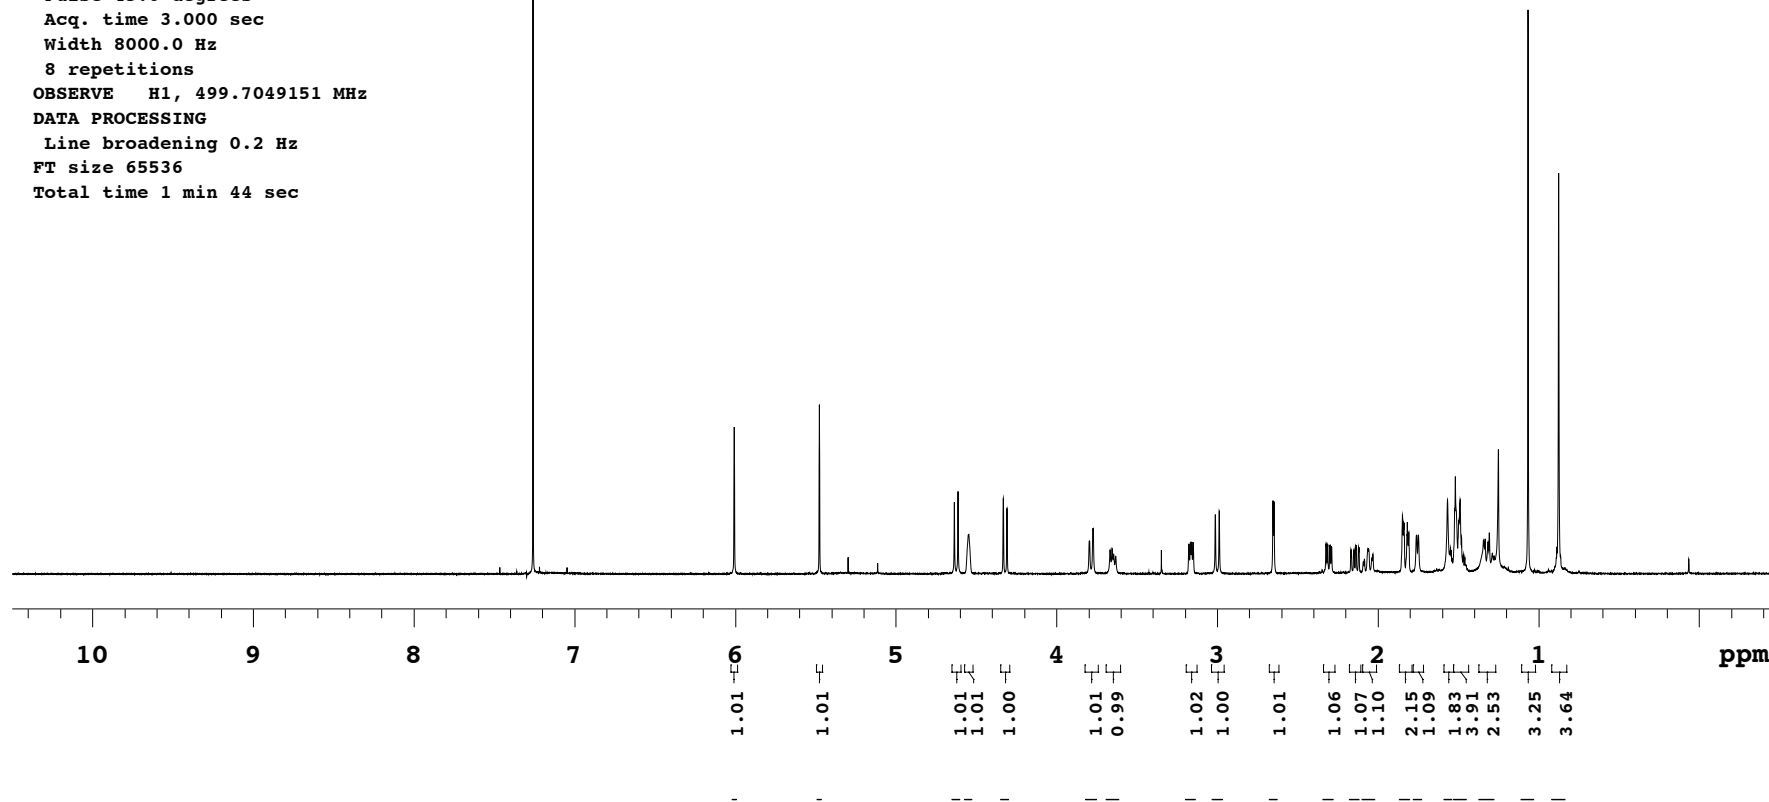



Sample Name:  
jtsy-ix-143prep  
Data Collected on:  
fid.caltech.edu-inova600  
Archive directory:  
/home/yeomanjo/vnmrsys/data  
Sample directory:  
jtsy-ix-143prep  
FidFile: PROTON01

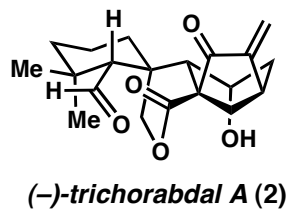

Pulse Sequence: PROTON (s2pul)  
Solvent: pyridine  
Data collected on: Mar 13 2013

Temp. 60.0 C / 333.1 K  
Operator: yeomanjo

Relax. delay 1.000 sec  
Pulse 45.0 degrees  
Acq. time 1.708 sec  
Width 9594.6 Hz  
8 repetitions  
OBSERVE H1, 599.6348295 MHz  
DATA PROCESSING  
Line broadening 0.2 Hz  
FT size 32768  
Total time 0 min 22 sec

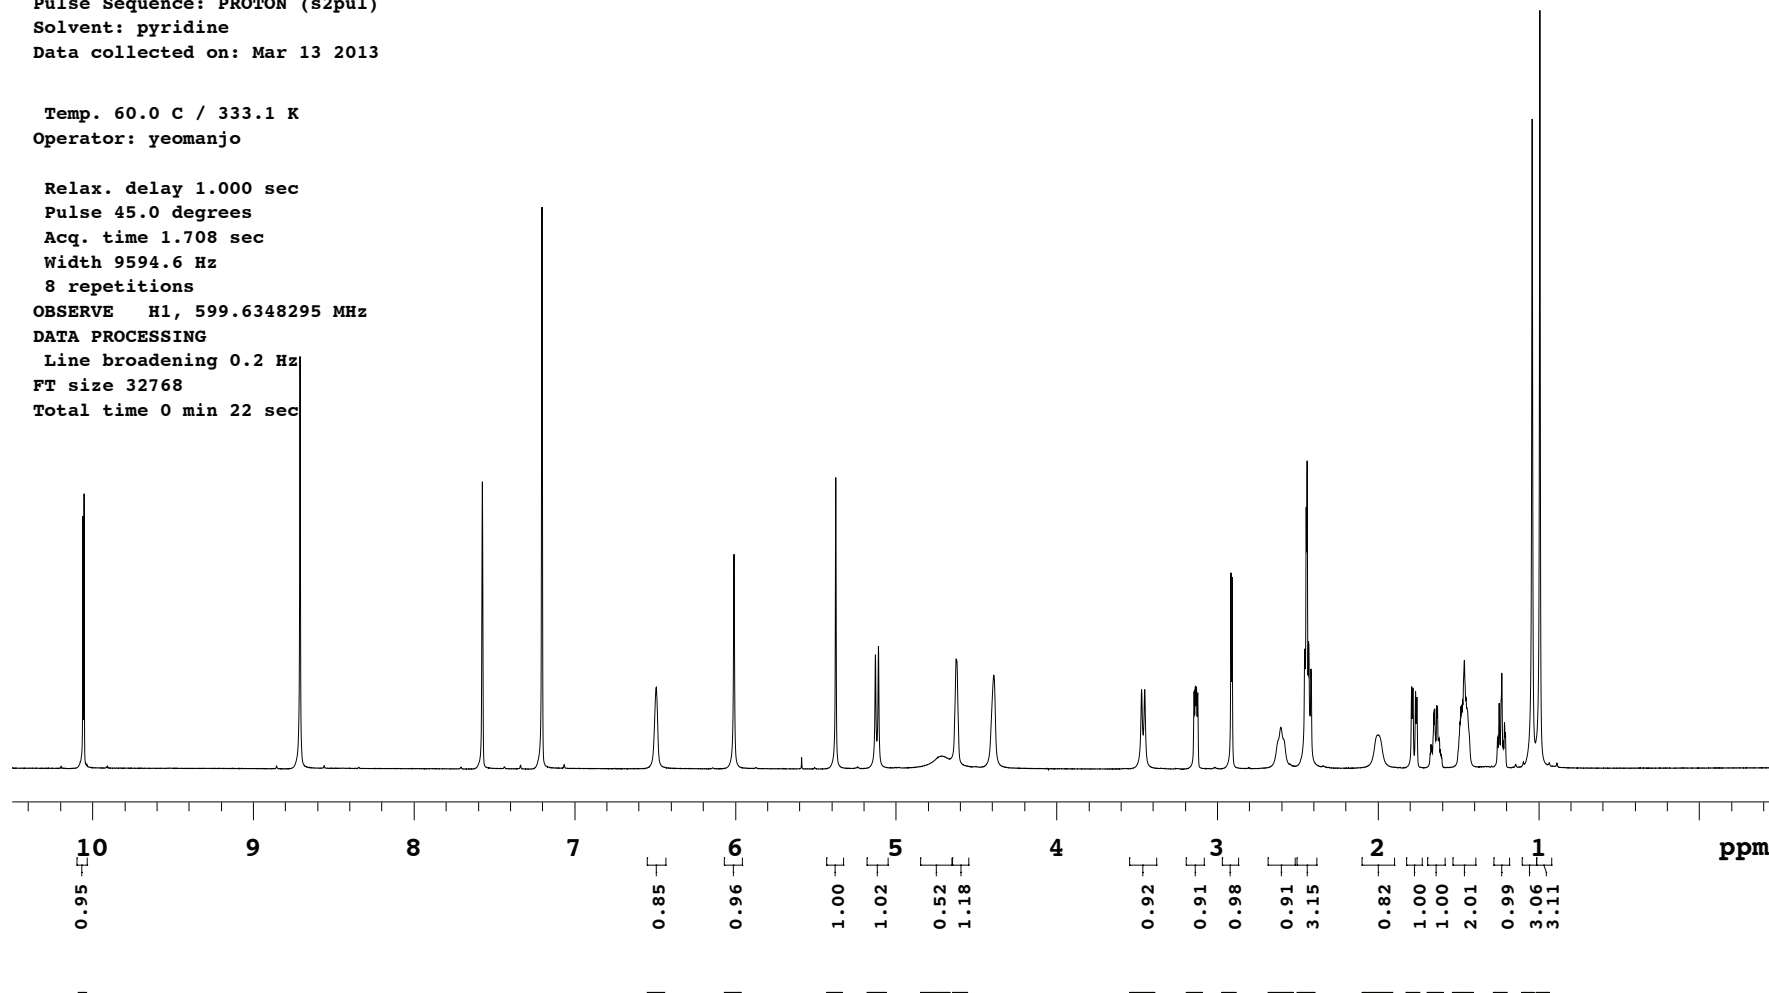

Sample Name:  
jtsy-ix-143prep  
Data Collected on:  
daytona.caltech.edu-inova500  
Archive directory:

Sample directory:

FidFile: jtsy-ix-143prep-c13

Pulse Sequence: CARBON (s2pul)  
Solvent: pyridine  
Data collected on: Mar 15 2013

Temp. 60.0 C / 333.1 K  
Operator: yeomanjo

Relax. delay 0.100 sec  
Pulse 45.0 degrees  
Acq. time 1.042 sec  
Width 31446.5 Hz  
13000 repetitions  
OBSERVE C13, 125.6870252 MHz  
DECOUPLE H1, 499.8512260 MHz  
Power 39 dB  
continuously on  
WALTZ-16 modulated  
DATA PROCESSING  
Line broadening 5.0 Hz  
FT size 65536  
Total time 4 hr, 7 min

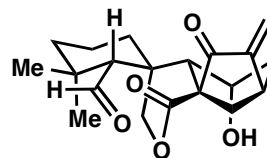

(-)-trichorabdal A (2)

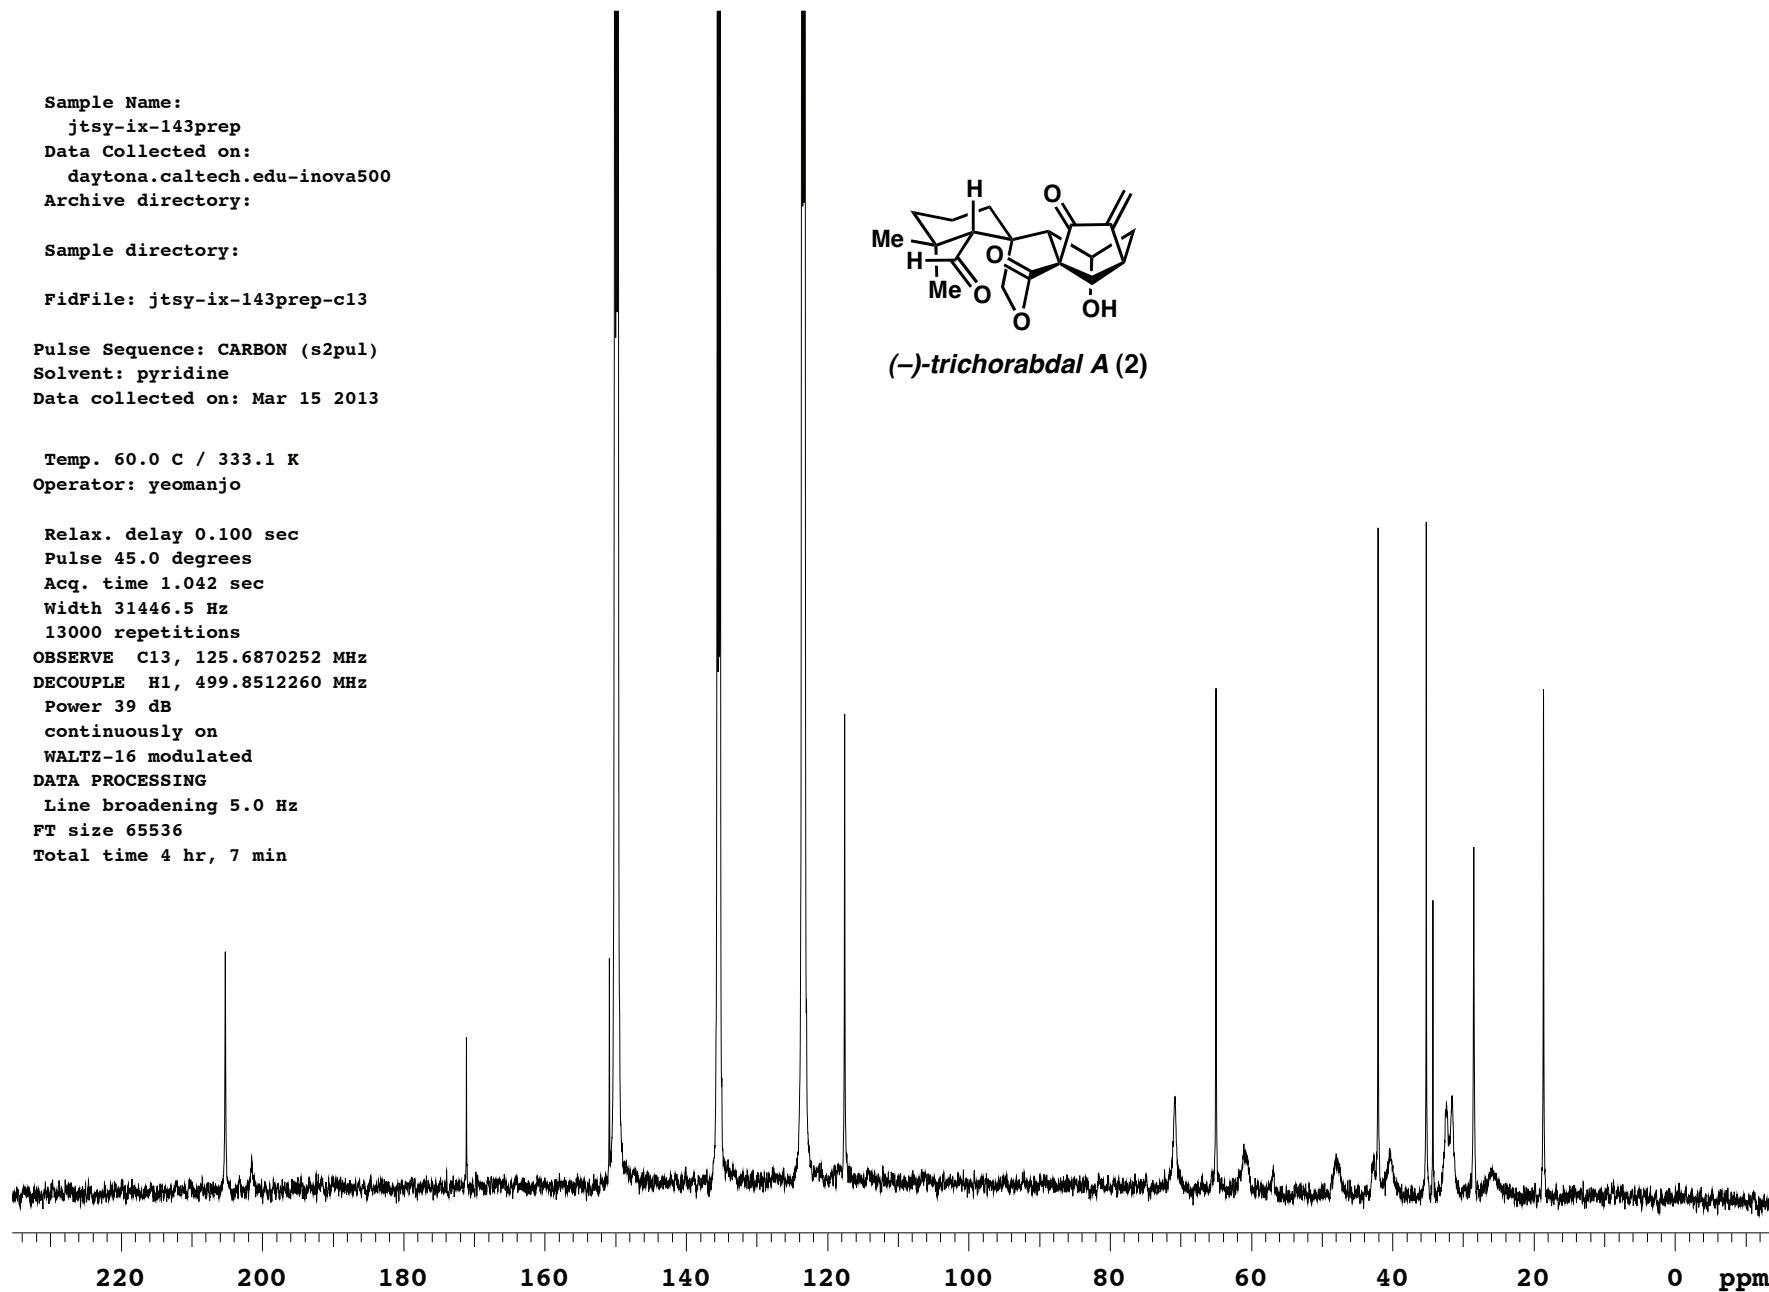

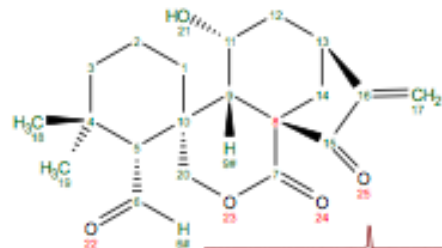

COSY of 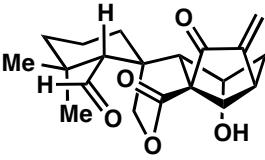  
 (-)-trichorabdal A (2)

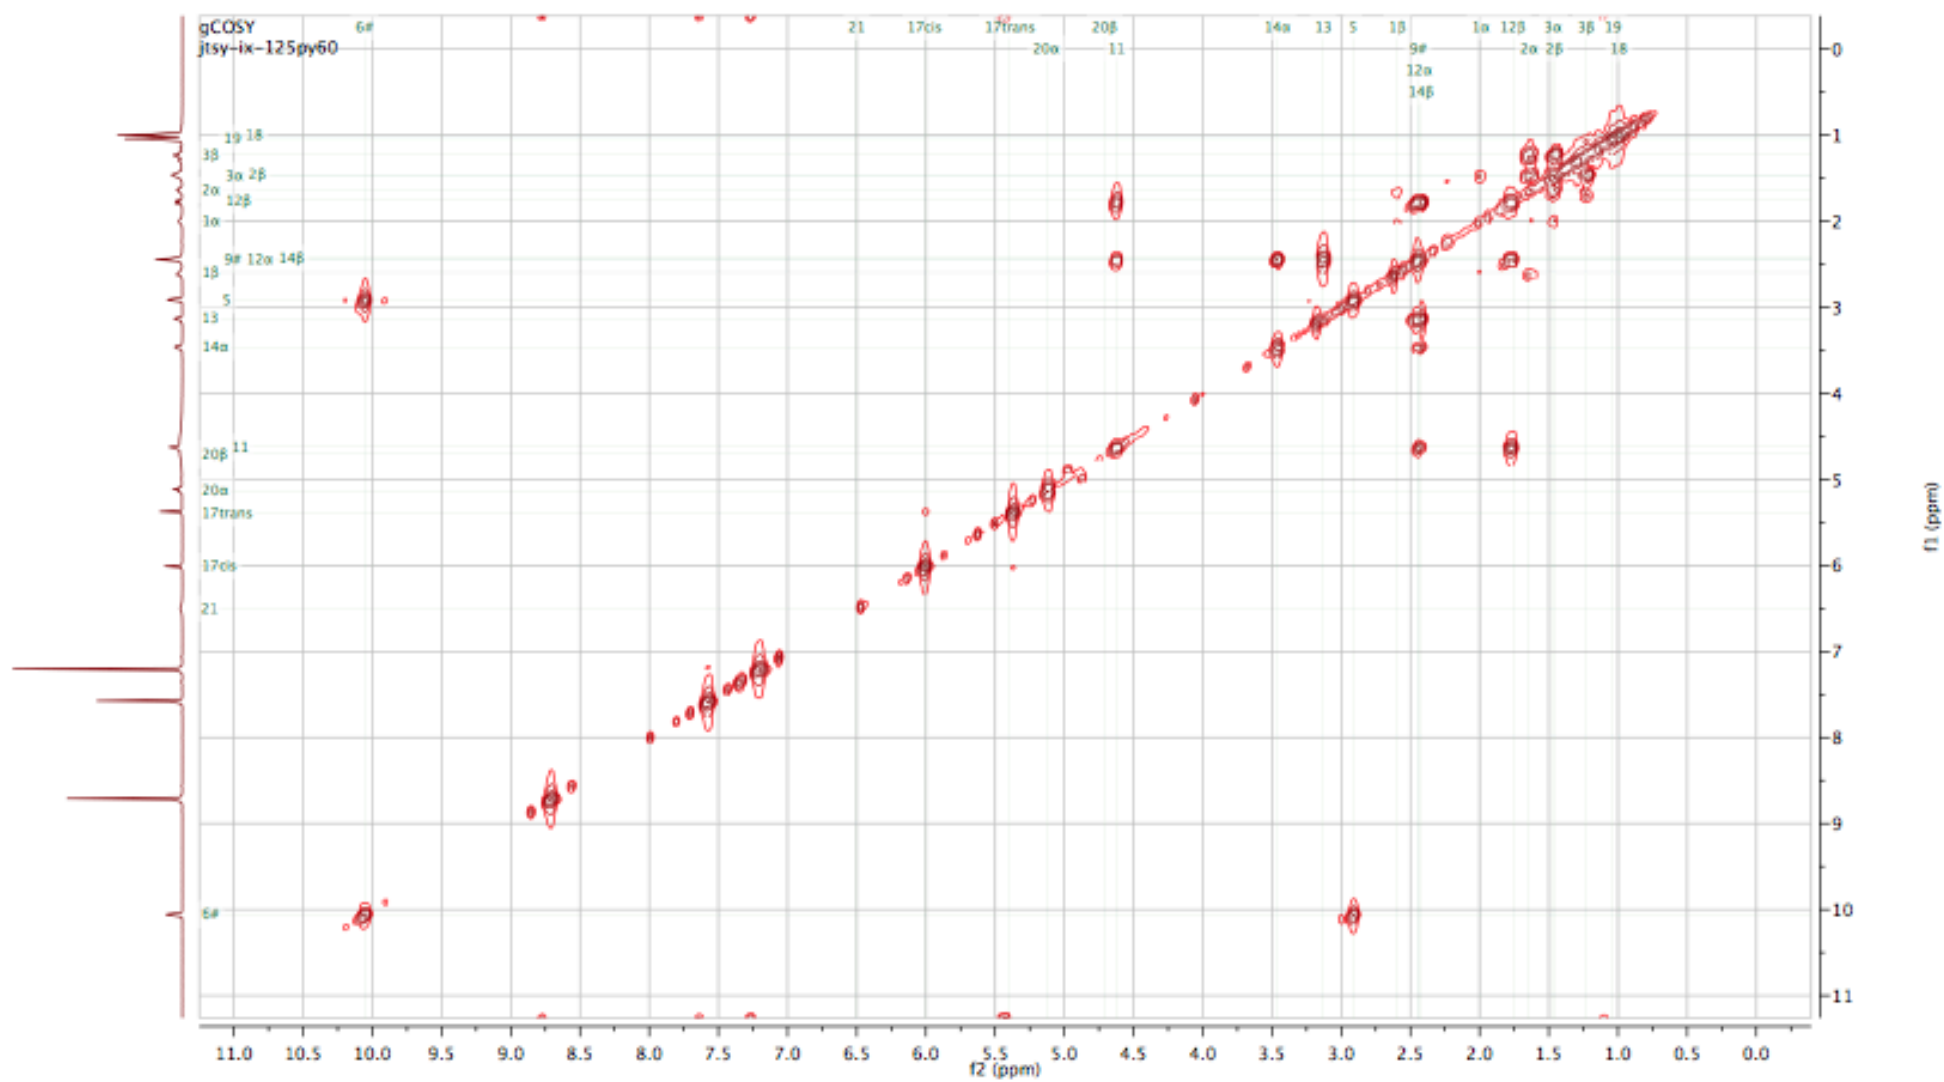

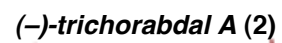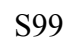

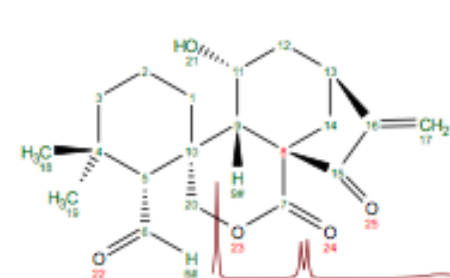

HSQC of **(-)-trichorabdal A (2)**

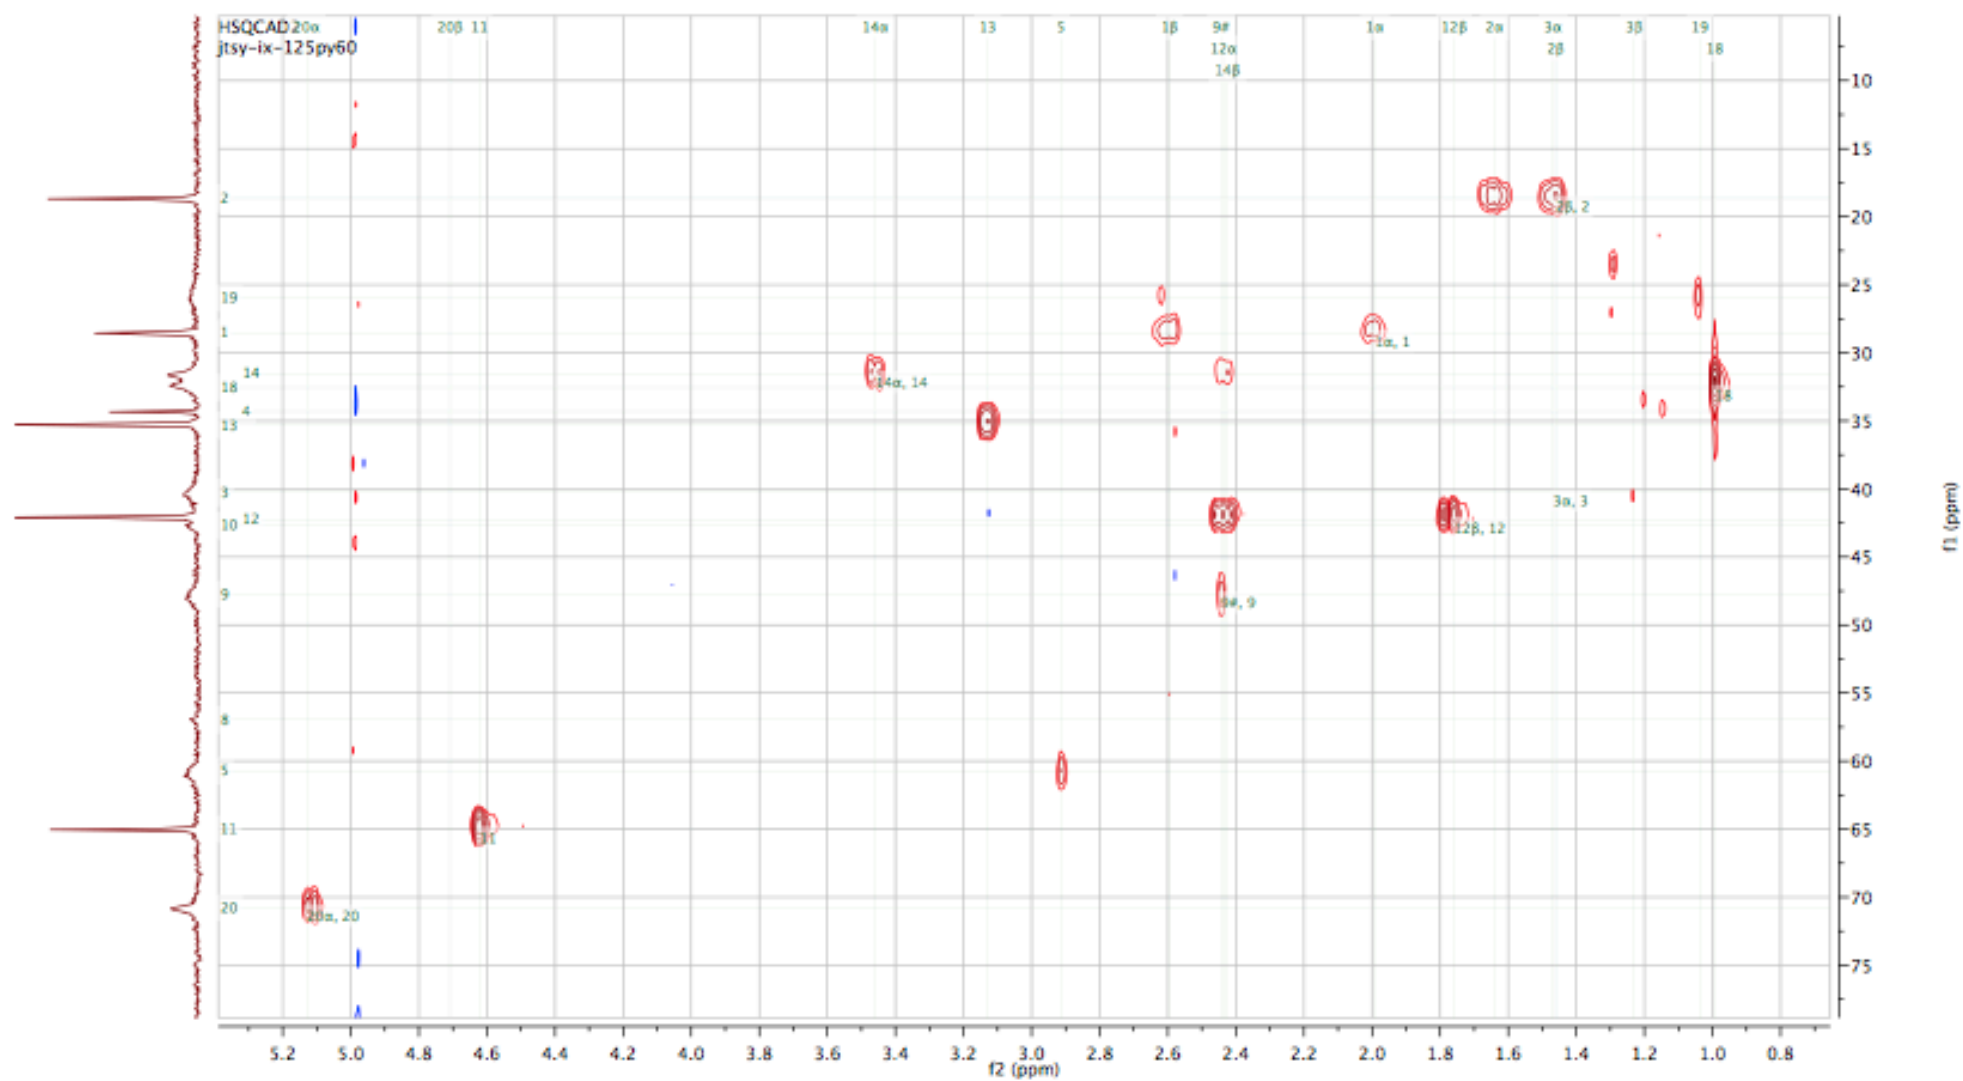



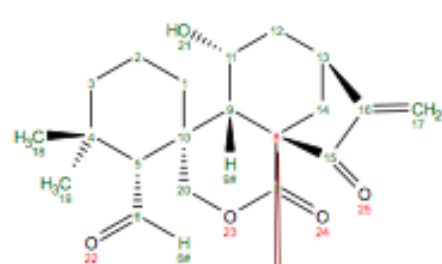

HMBC of

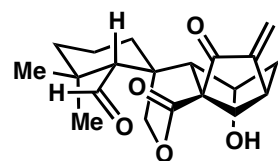

(-)-trichorabdal A (2)

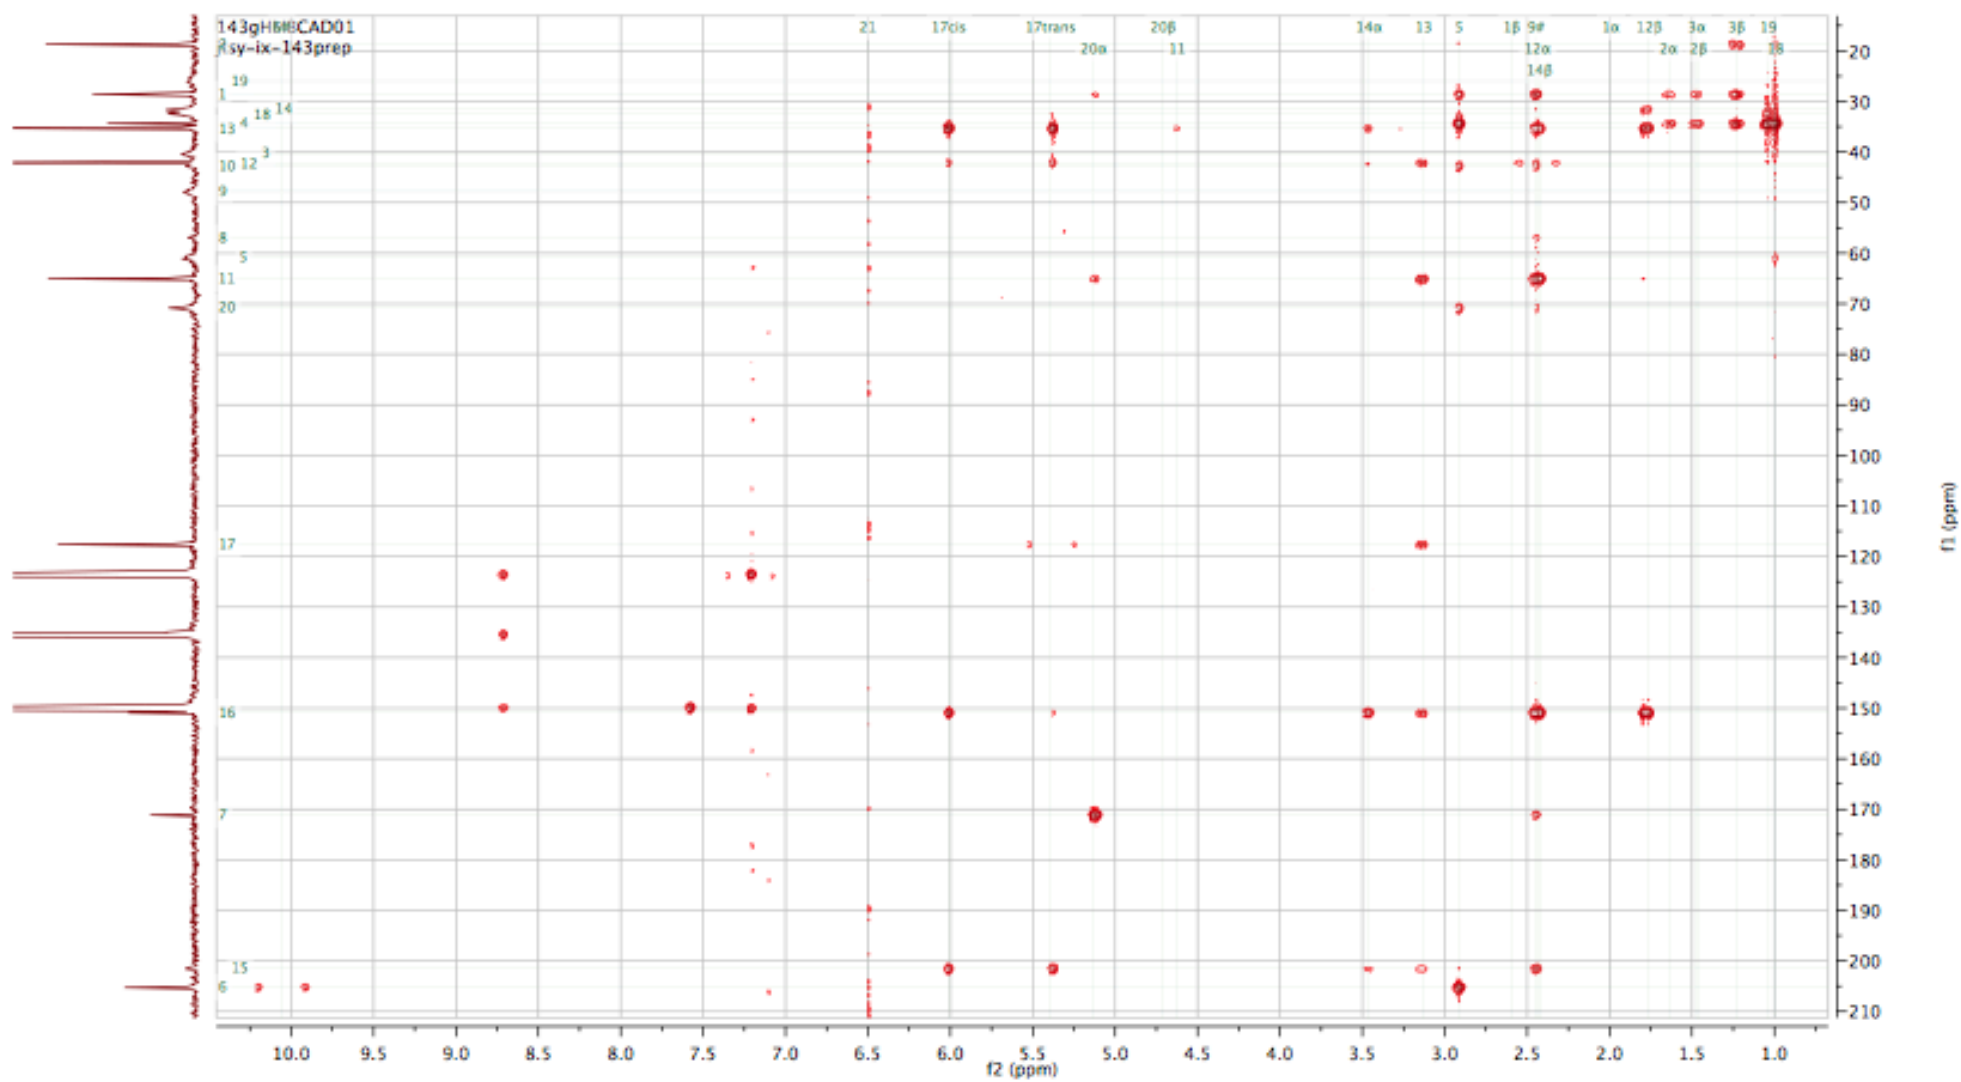

Sample Name:  
 VWM2-007-c2f13-24  
 Data Collected on:  
 indy.caltech.edu-inova500  
 Archive directory:  
 /home/vmak/vnmrsys/data  
 Sample directory:  
 VWM2-007-c2f13-24  
 FidFile: PROTON01

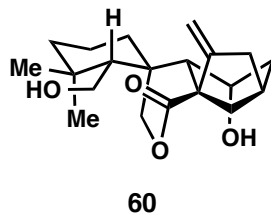

Pulse Sequence: PROTON (s2pul)  
 Solvent: cdcl3  
 Data collected on: May 1 2013

Sample #27, Operator: vmak

Relax. delay 1.000 sec  
 Pulse 45.0 degrees  
 Acq. time 2.621 sec  
 Width 6250.0 Hz  
 16 repetitions  
 OBSERVE H1, 499.7049153 MHz  
 DATA PROCESSING  
 Line broadening 0.2 Hz  
 FT size 32768  
 Total time 0 min 58 sec

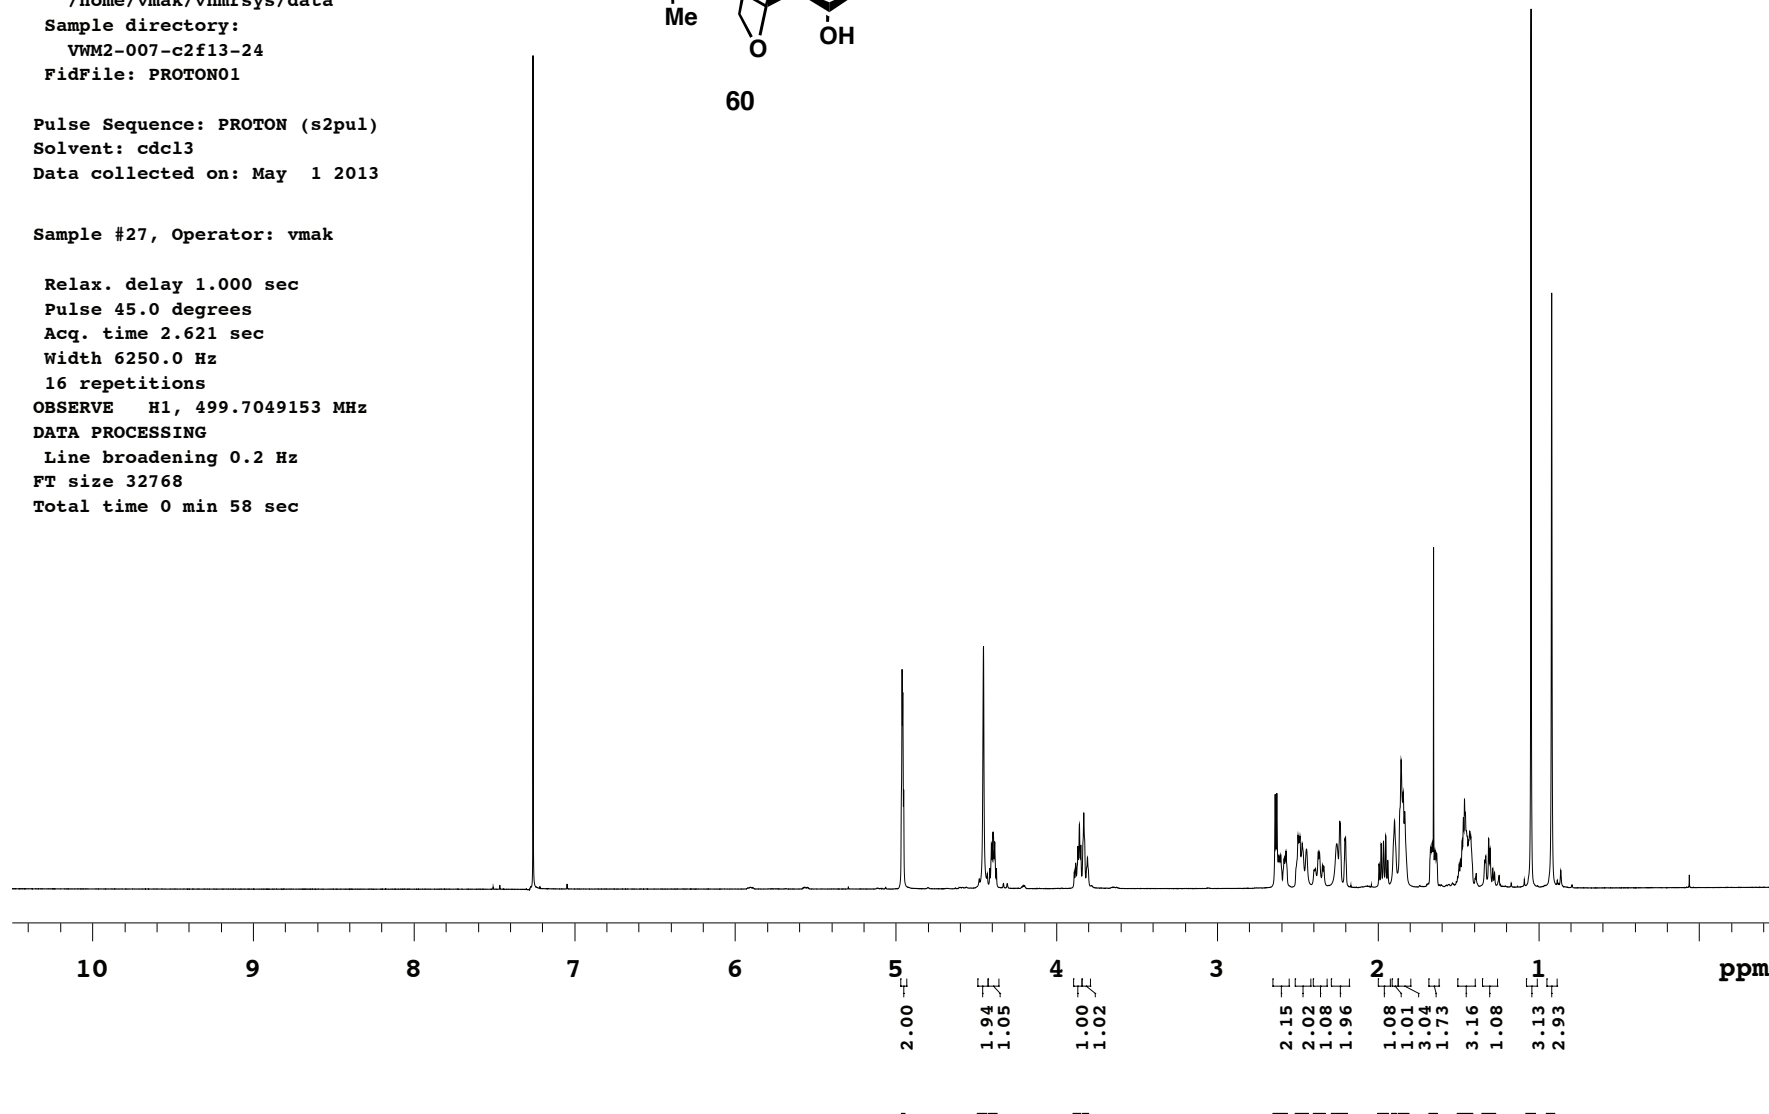

Sample Name:  
VWM2-007-c2f13-24  
Data Collected on:  
indy.caltech.edu-inova500  
Archive directory:  
/home/vmak/vnmrsys/data  
Sample directory:  
VWM2-007-c2f13-24  
FidFile: CARBON01

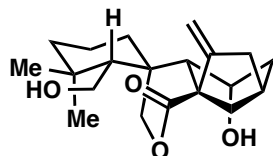

60

Pulse Sequence: CARBON (s2pul)  
Solvent: cdcl3  
Data collected on: May 1 2013

Sample #27, Operator: vmak

Relax. delay 1.000 sec  
Pulse 45.0 degrees  
Acq. time 1.042 sec  
Width 31446.5 Hz  
1000 repetitions  
OBSERVE C13, 125.6509033 MHz  
DECOUPLE H1, 499.7074131 MHz  
Power 40 dB  
continuously on  
WALTZ-16 modulated  
DATA PROCESSING  
Line broadening 1.0 Hz  
FT size 65536  
Total time 34 min

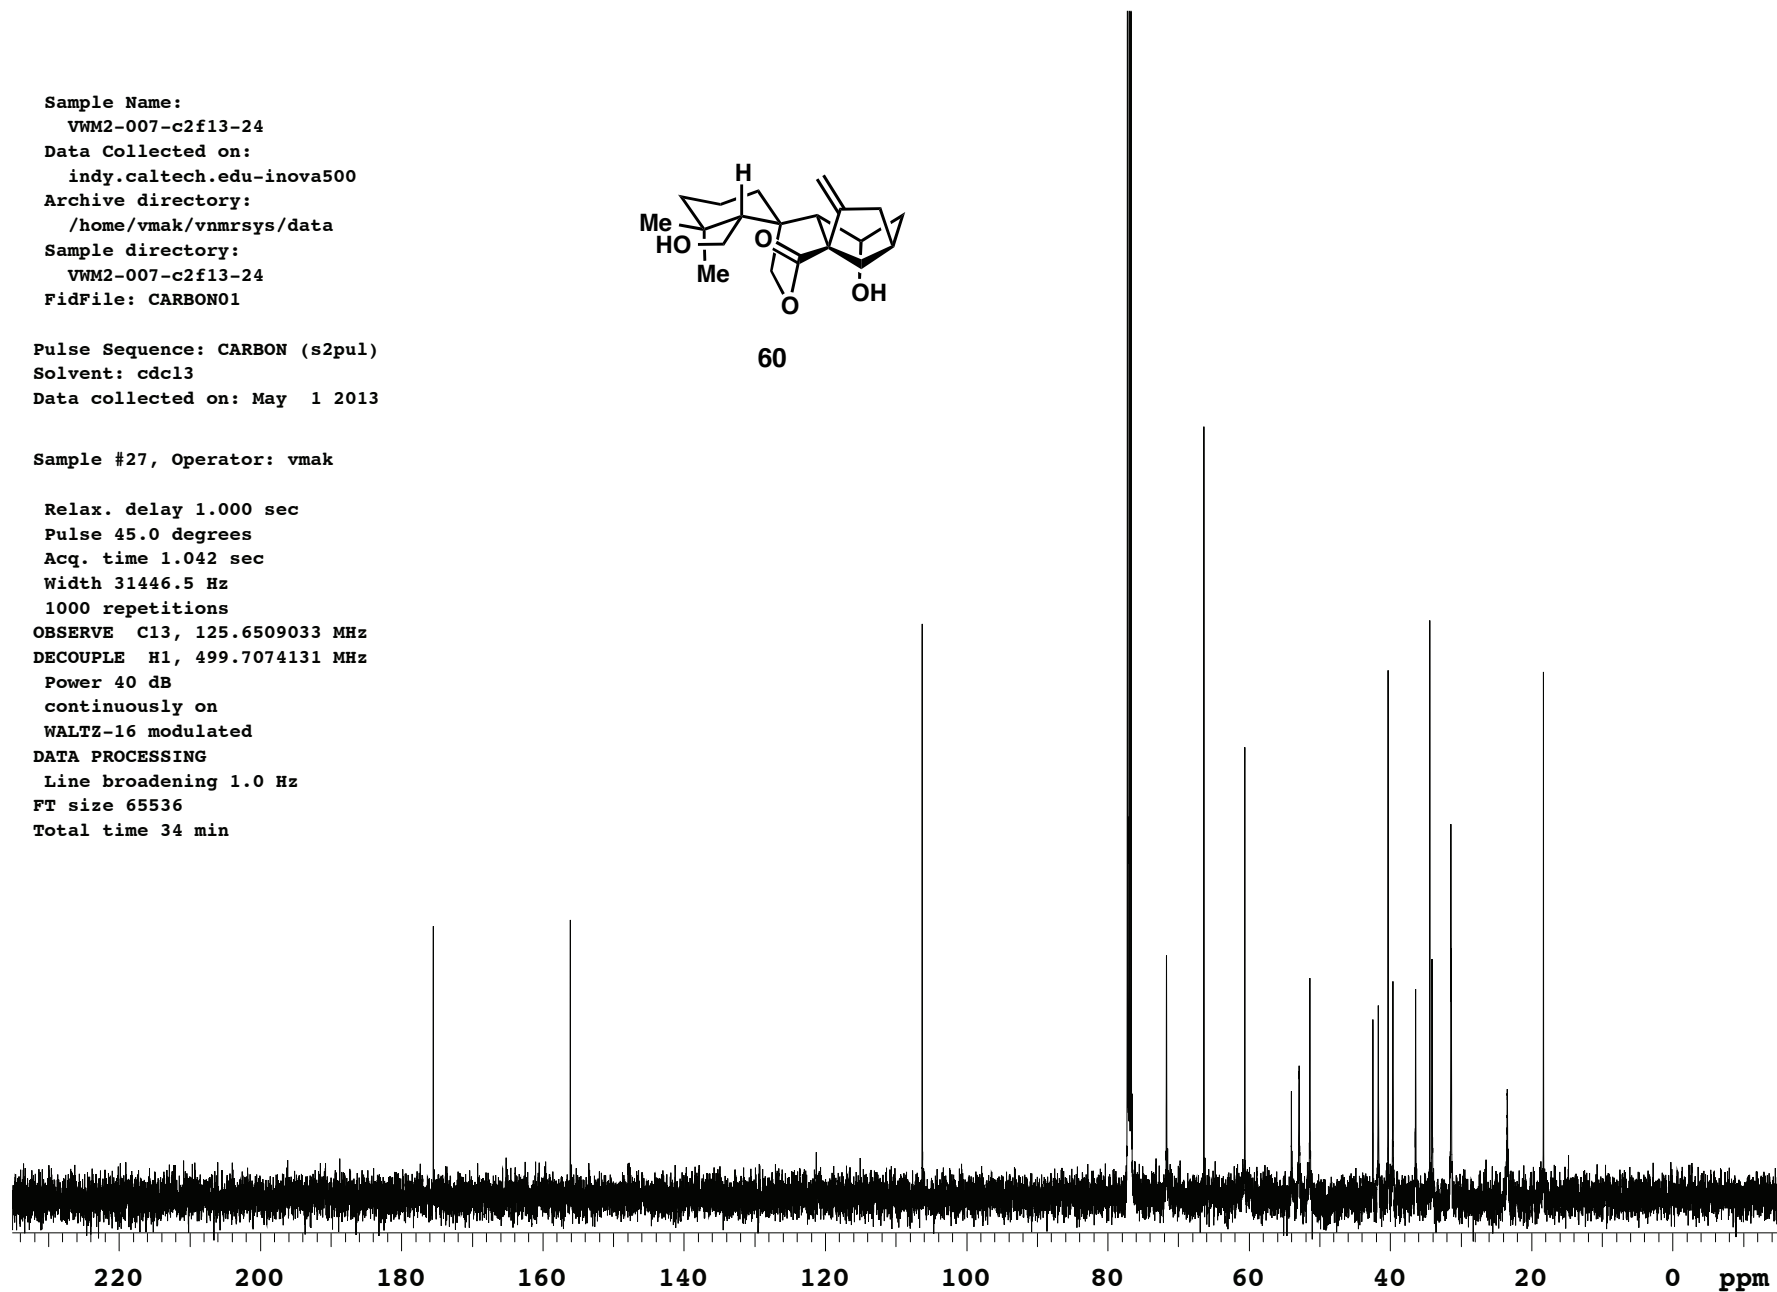

VWM2-019

Sample Name:  
VWM2-019  
Data Collected on:  
fid.caltech.edu-inova600  
Archive directory:  
/home/vmak/vnmrsys/data  
Sample directory:  
VWM2-019  
FidFile: PROTON01

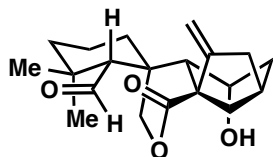

SI-6

Pulse Sequence: PROTON (s2pul)  
Solvent: CDCl3  
Data collected on: May 9 2013

Temp. 25.0 C / 298.1 K  
Operator: vmak

Relax. delay 1.000 sec  
Pulse 45.0 degrees  
Acq. time 1.705 sec  
Width 9611.9 Hz  
8 repetitions  
OBSERVE H1, 599.6357305 MHz  
DATA PROCESSING  
Line broadening 0.2 Hz  
FT size 32768  
Total time 0 min 22 sec

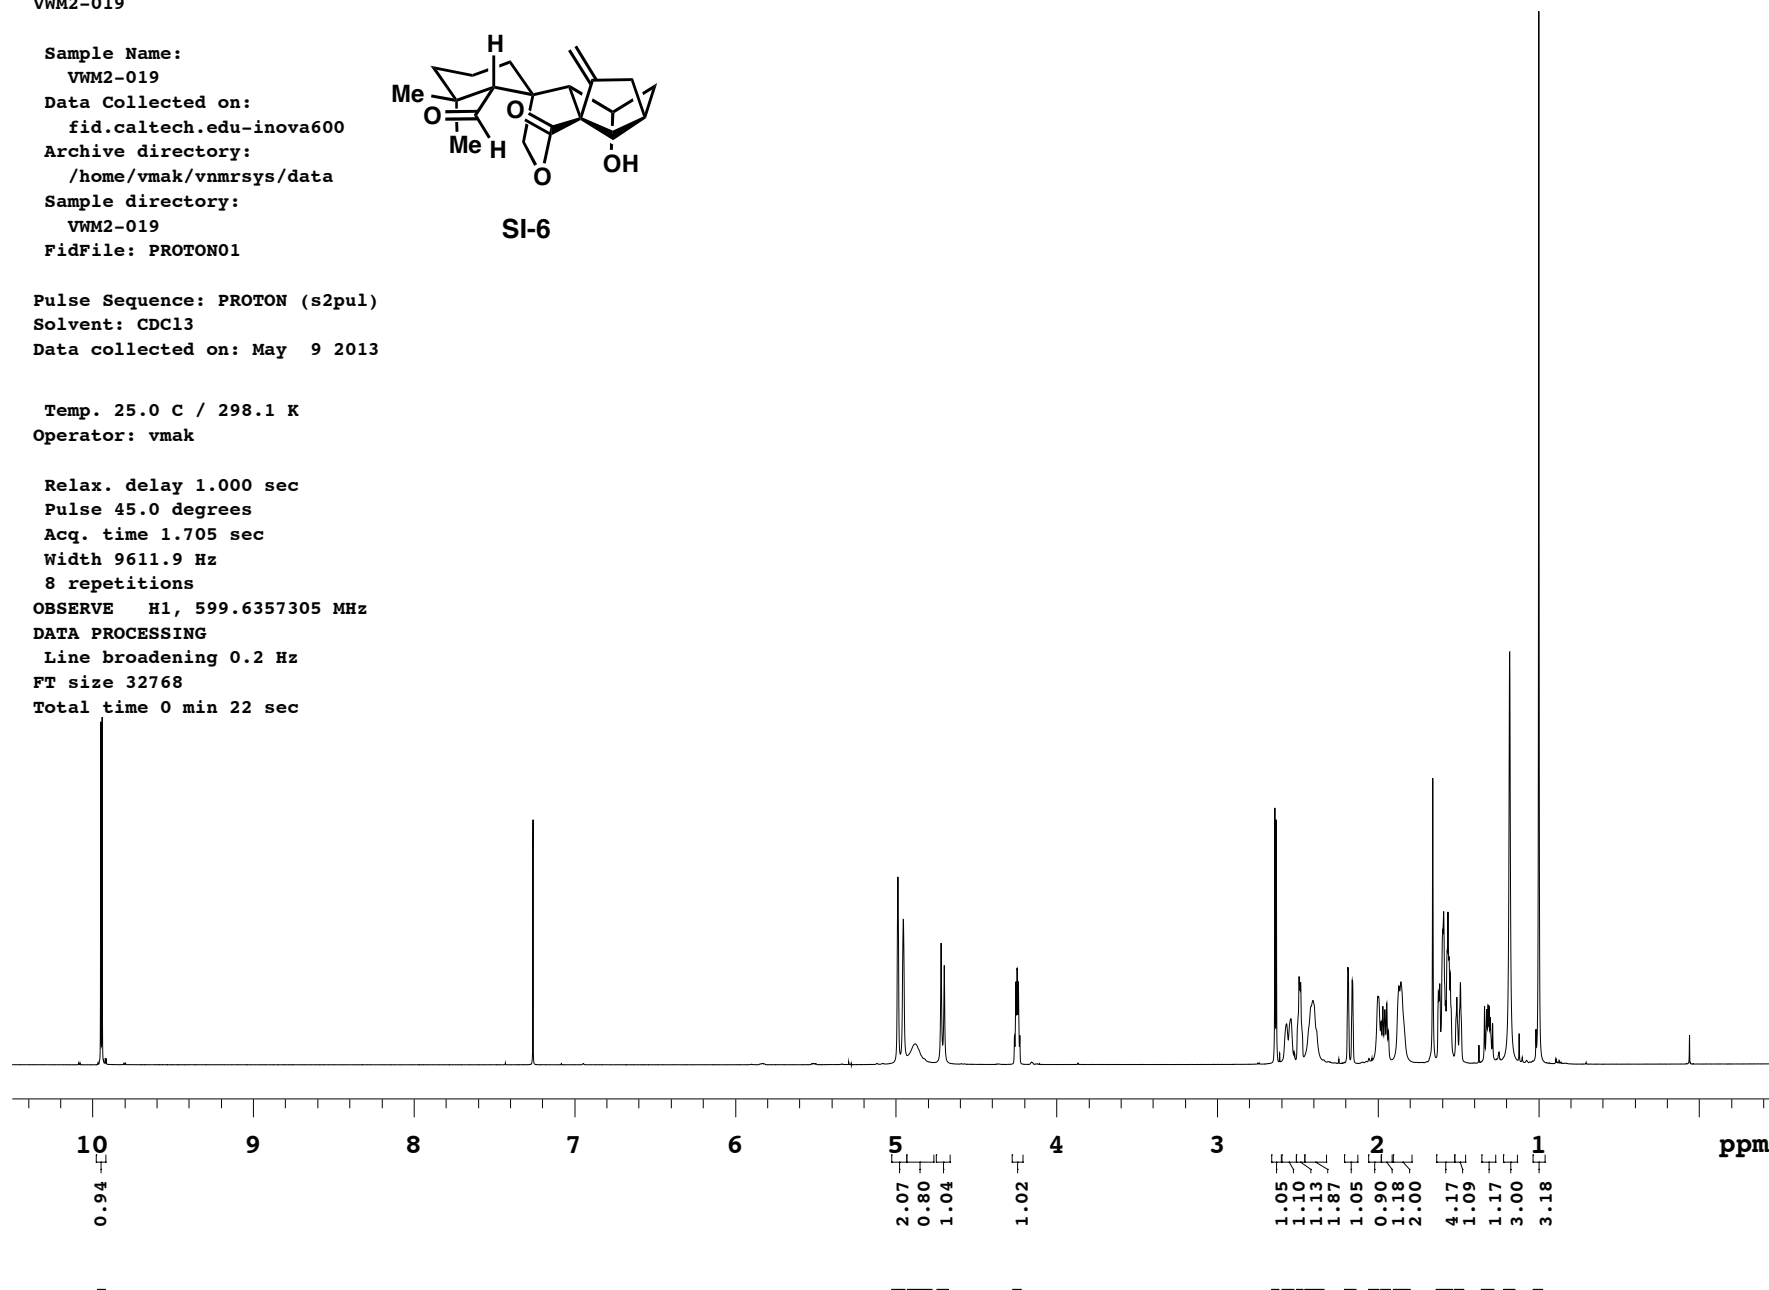

Sample Name:  
VWM2-019-comb  
Data Collected on:  
indy.caltech.edu-inova500  
Archive directory:  
/home/vmak/vnmrsys/data  
Sample directory:  
VWM2-019-comb  
FidFile: CARBON01

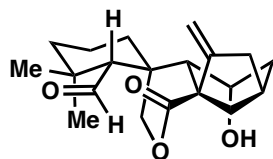

SI-6

Pulse Sequence: CARBON (s2pul)  
Solvent: cdcl3  
Data collected on: May 9 2013

Sample #22, Operator: vmak

Relax. delay 0.500 sec  
Pulse 45.0 degrees  
Acq. time 1.042 sec  
Width 31446.5 Hz  
2250 repetitions  
OBSERVE C13, 125.6509043 MHz  
DECOUPLE H1, 499.7074131 MHz  
Power 40 dB  
continuously on  
WALTZ-16 modulated  
DATA PROCESSING  
Line broadening 4.0 Hz  
FT size 65536  
Total time 58 min

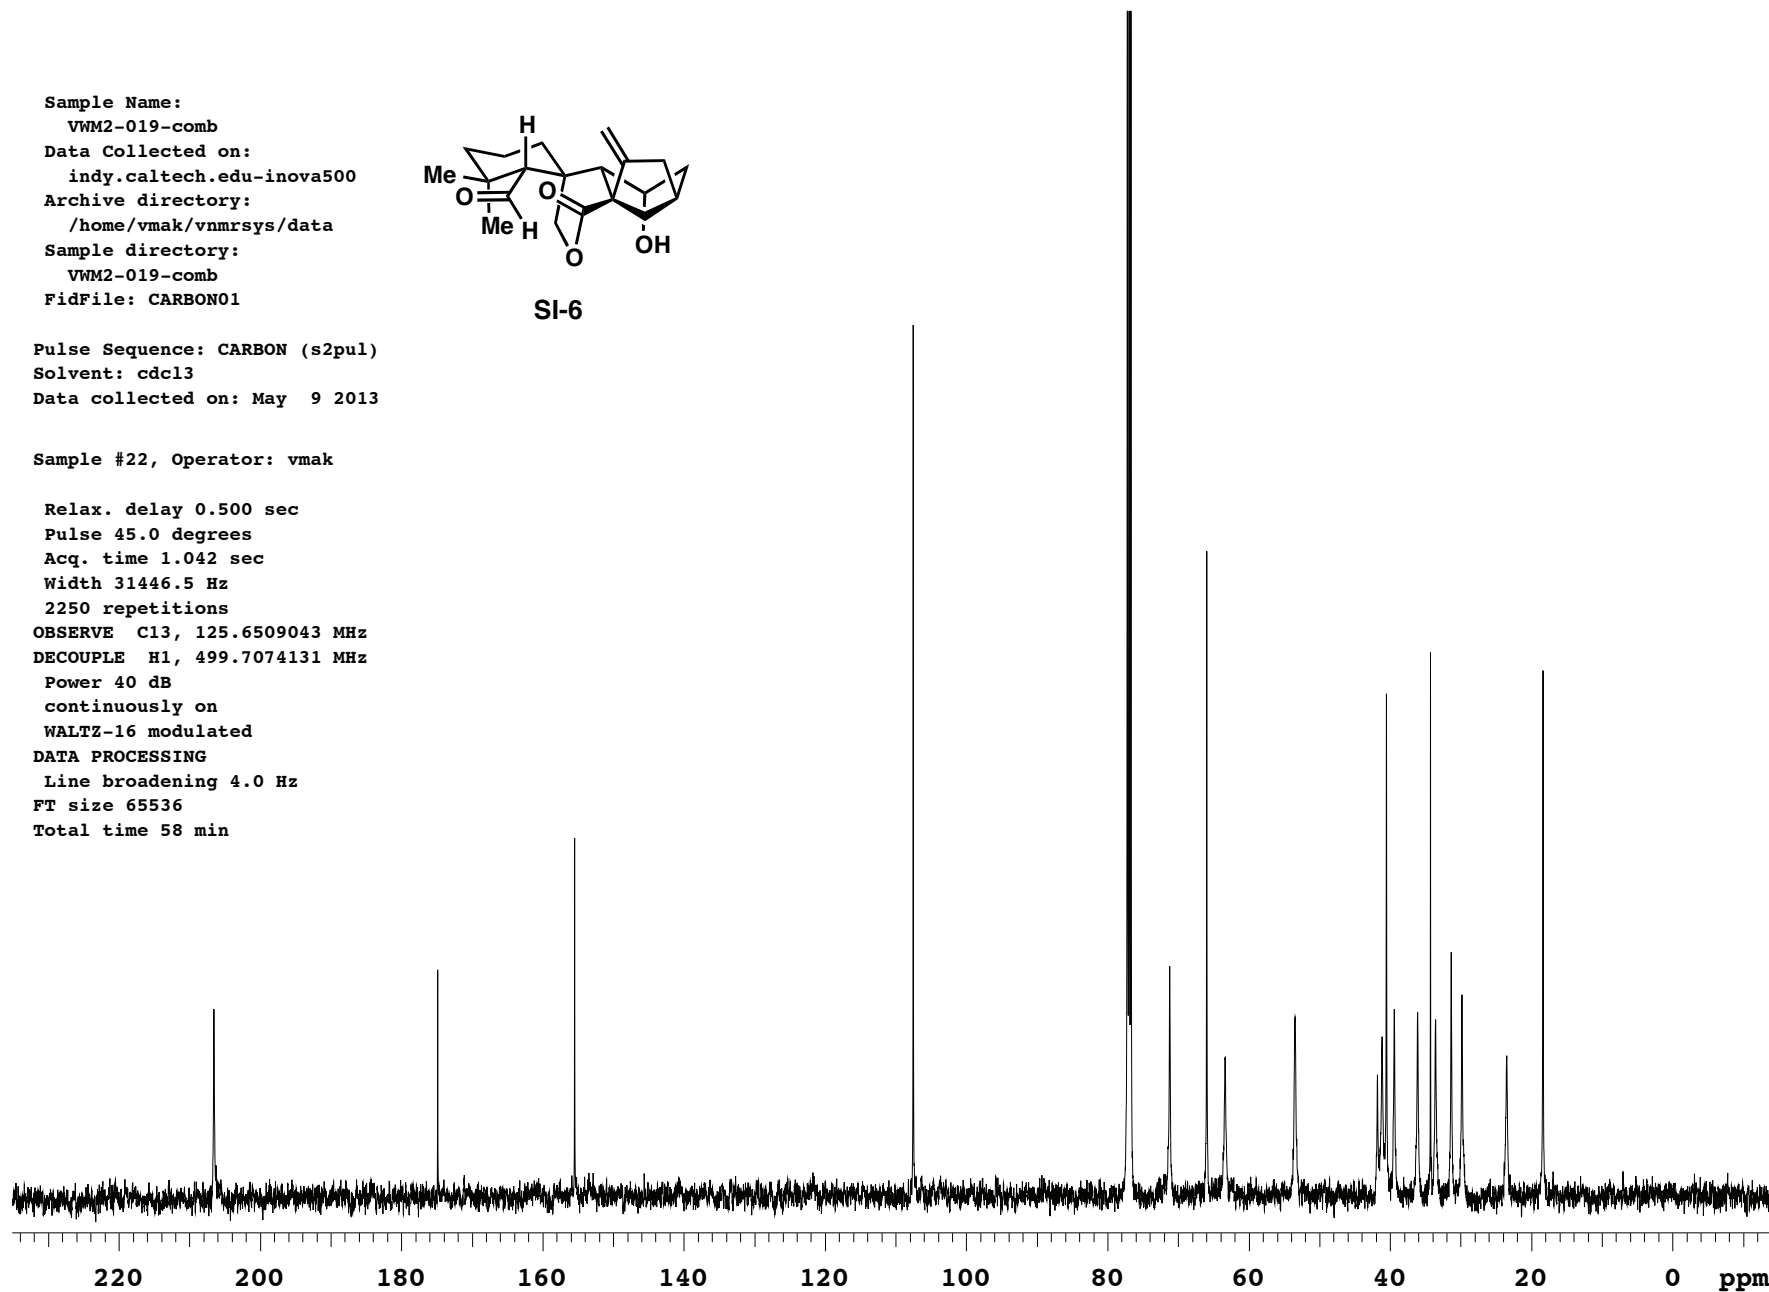

Sample Name:  
 VWM2-017-f14-19  
 Data Collected on:  
 indy.caltech.edu-inova500  
 Archive directory:  
 /home/vmak/vnmrsys/data  
 Sample directory:  
 VWM2-017-f14-19  
 FidFile: PROTON01

Pulse Sequence: PROTON (s2pul)  
 Solvent: cdcl3  
 Data collected on: May 7 2013

Sample #35, Operator: vmak

Relax. delay 2.000 sec  
 Pulse 45.0 degrees  
 Acq. time 2.048 sec  
 Width 8000.0 Hz  
 32 repetitions  
 OBSERVE H1, 499.7049153 MHz  
 DATA PROCESSING  
 Line broadening 0.2 Hz  
 FT size 32768  
 Total time 2 min 10 sec

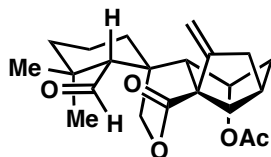

61

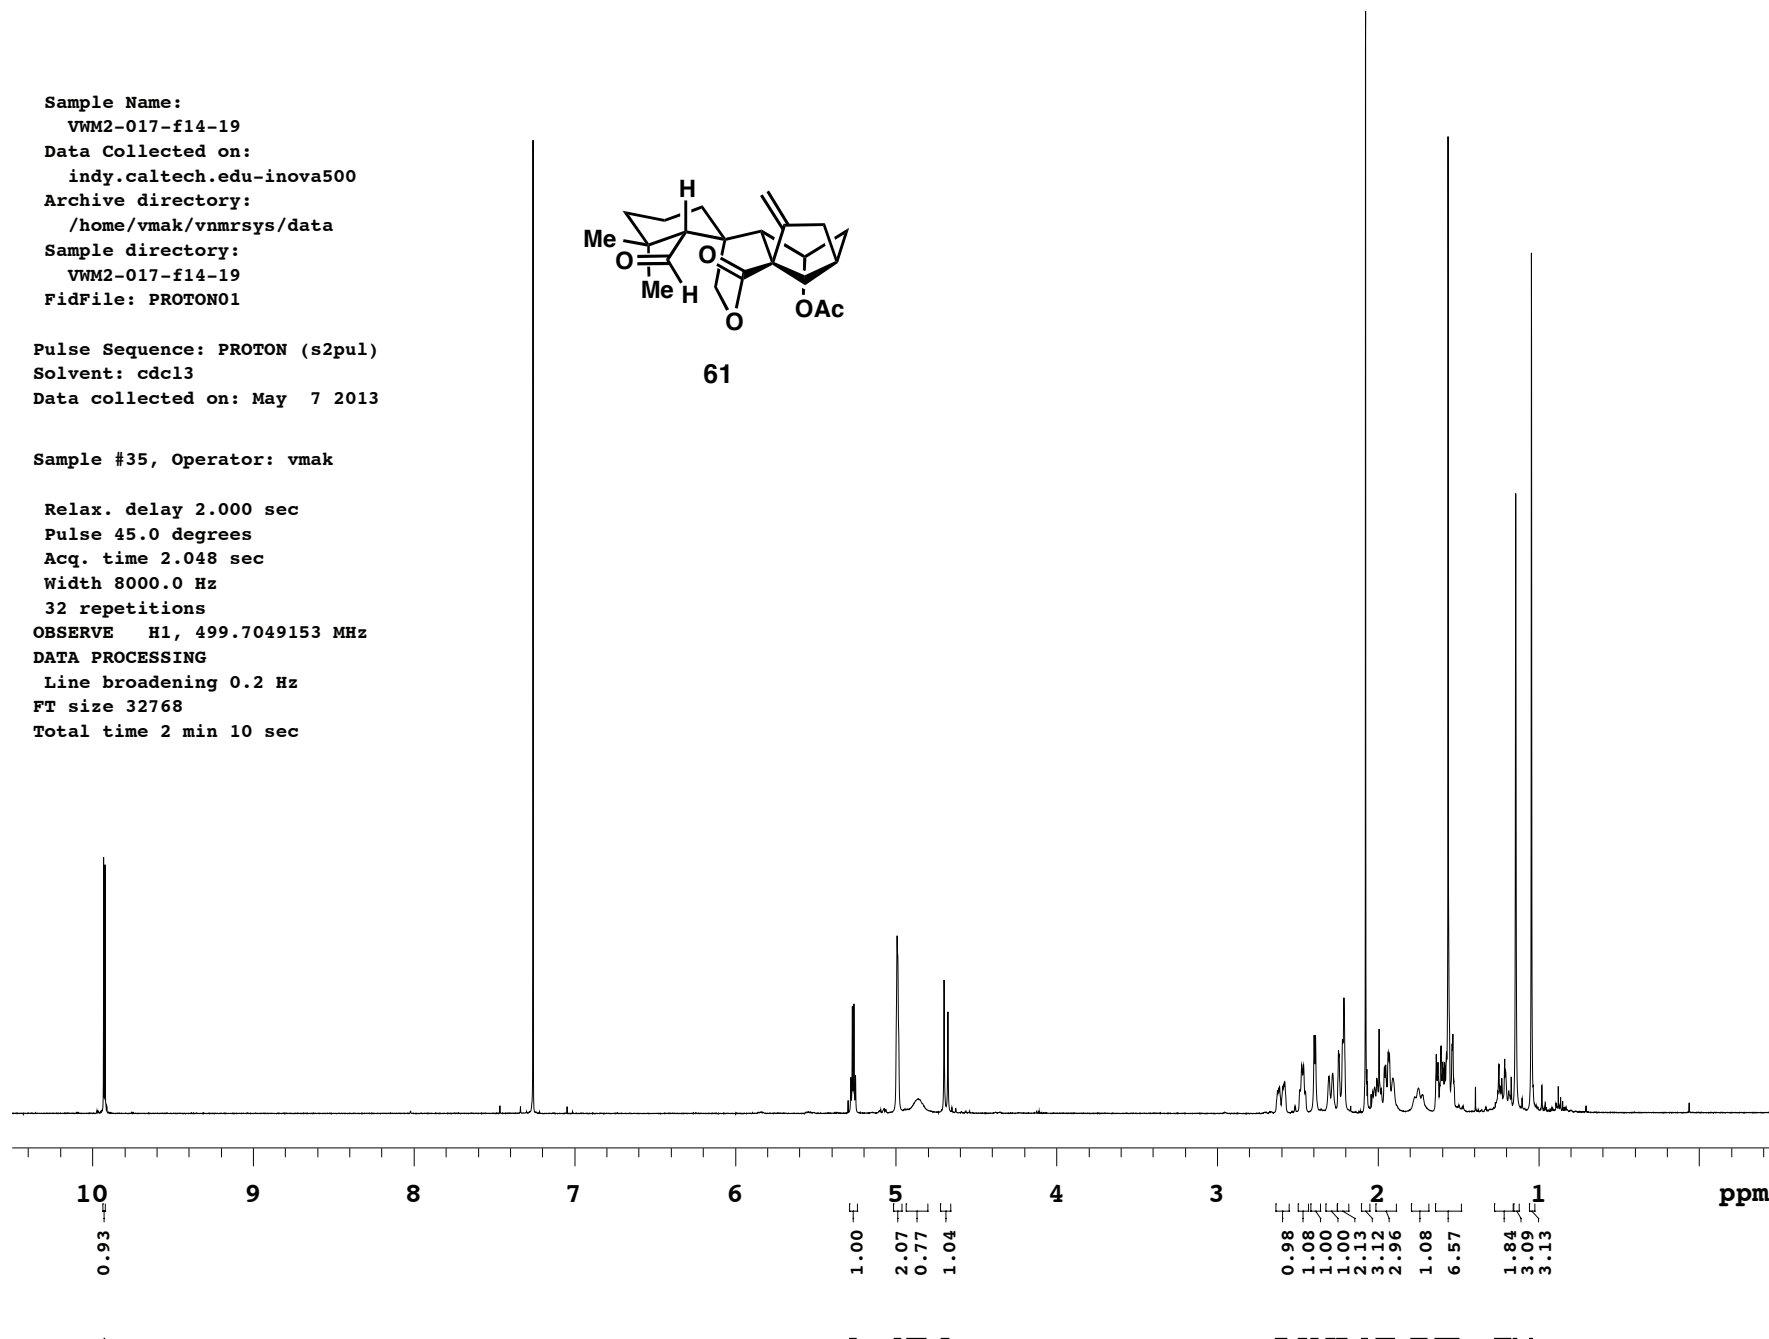

Pulse Sequence: CARBON (s2pul)  
Solvent: cdcl3  
Data collected on: May 9 2013

61

Sample #21, Operator: vmak

```

Relax. delay 0.500 sec
Pulse 45.0 degrees
Acq. time 1.042 sec
Width 31446.5 Hz
2250 repetitions
OBSERVE C13, 125.6509033 MHz
DECOUPLE H1, 499.7074131 MHz
Power 40 dB
continuously on
WALTZ-16 modulated
DATA PROCESSING
Line broadening 4.0 Hz
FT size 65536
Total time 58 min

```

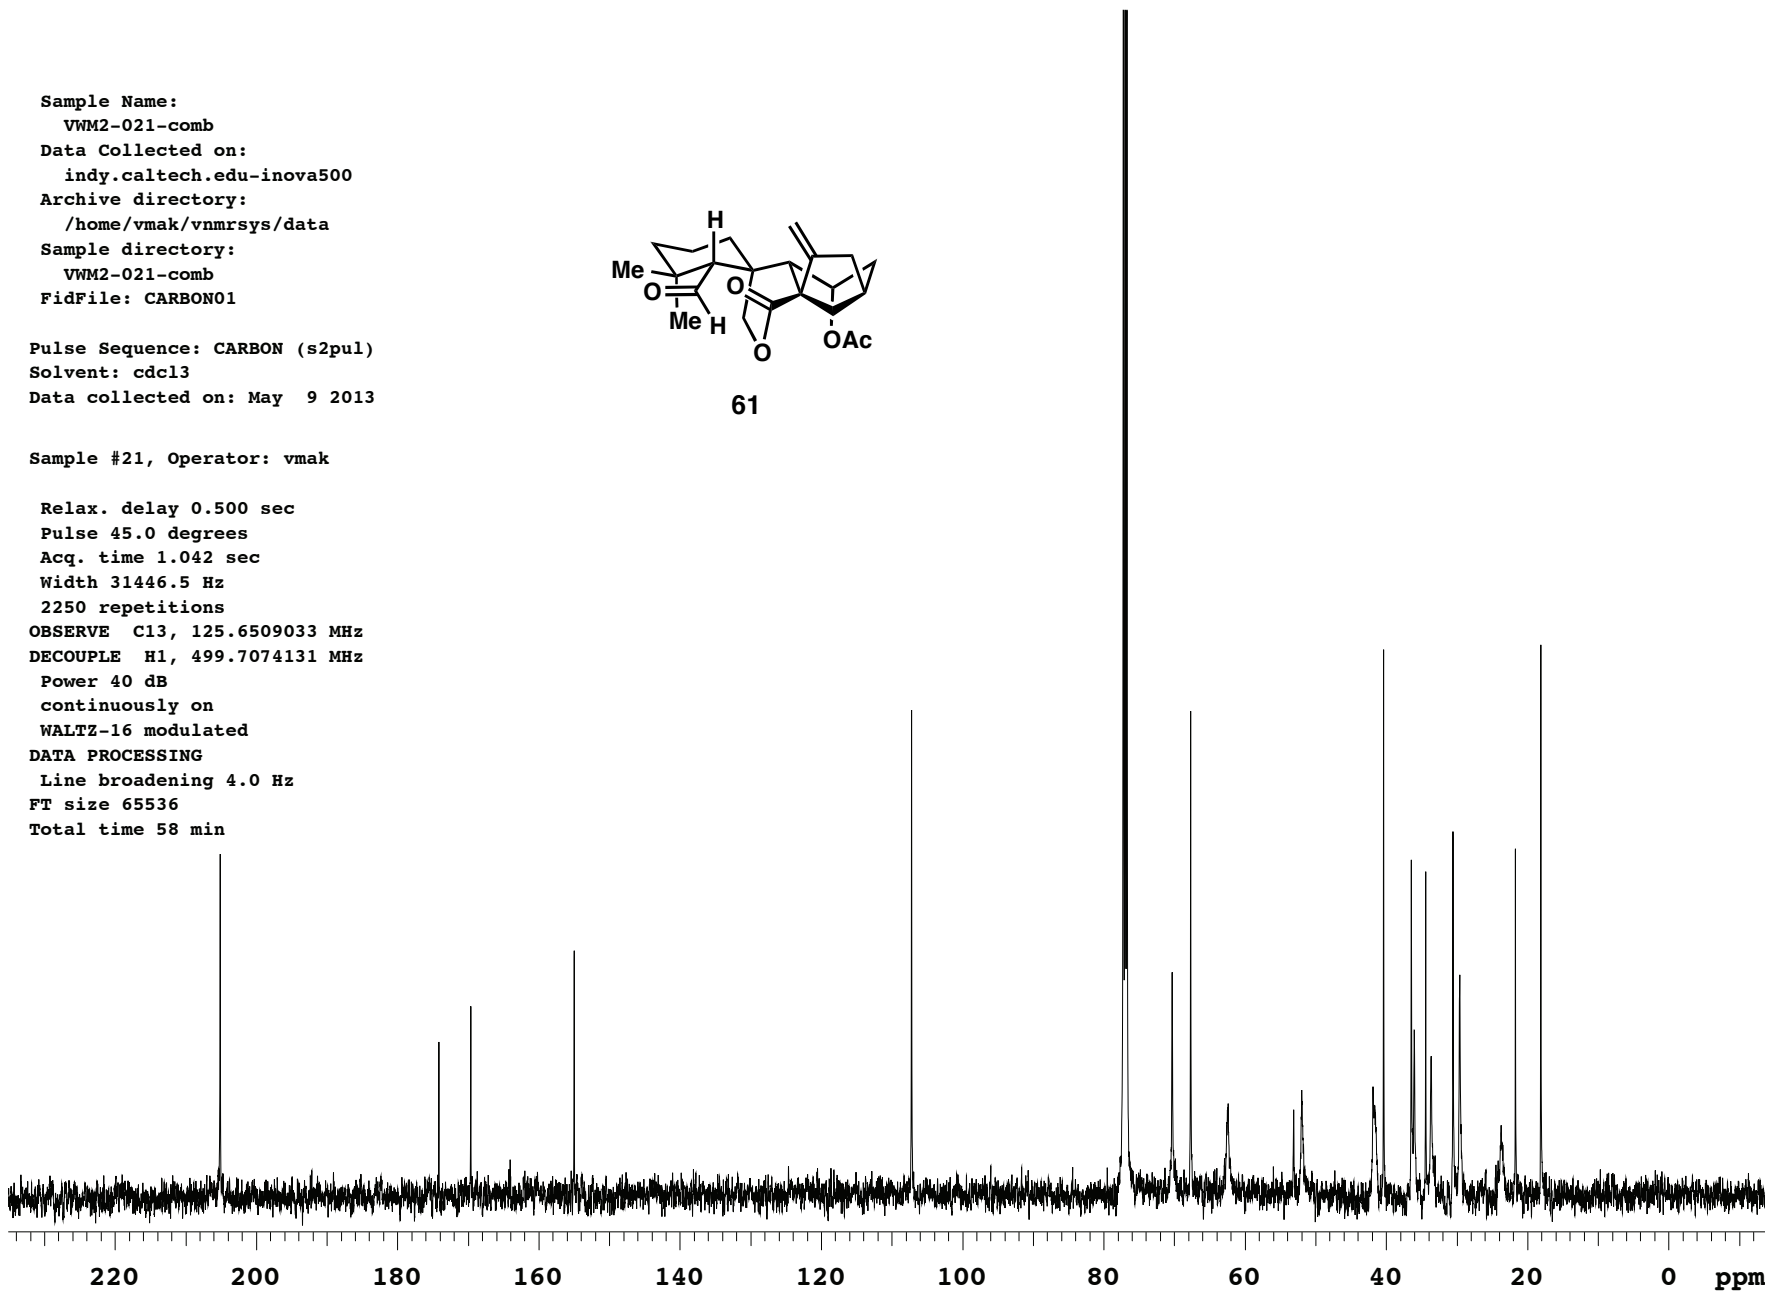

Sample Name:  
VWM2-033c  
Data Collected on:  
indy.caltech.edu-inova500  
Archive directory:  
/home/vmak/vnmrsys/data  
Sample directory:  
VWM2-033c  
FidFile: PROTON01

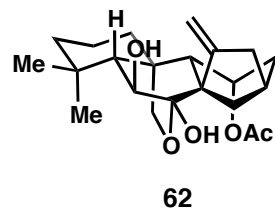

Pulse Sequence: PROTON (s2pul)  
Solvent: cdcl3  
Data collected on: May 17 2013

Sample #33, Operator: vmak

Relax. delay 2.000 sec  
Pulse 45.0 degrees  
Acq. time 2.621 sec  
Width 6250.0 Hz  
32 repetitions  
OBSERVE H1, 499.7049149 MHz  
DATA PROCESSING  
Line broadening 0.2 Hz  
FT size 32768  
Total time 2 min 28 sec

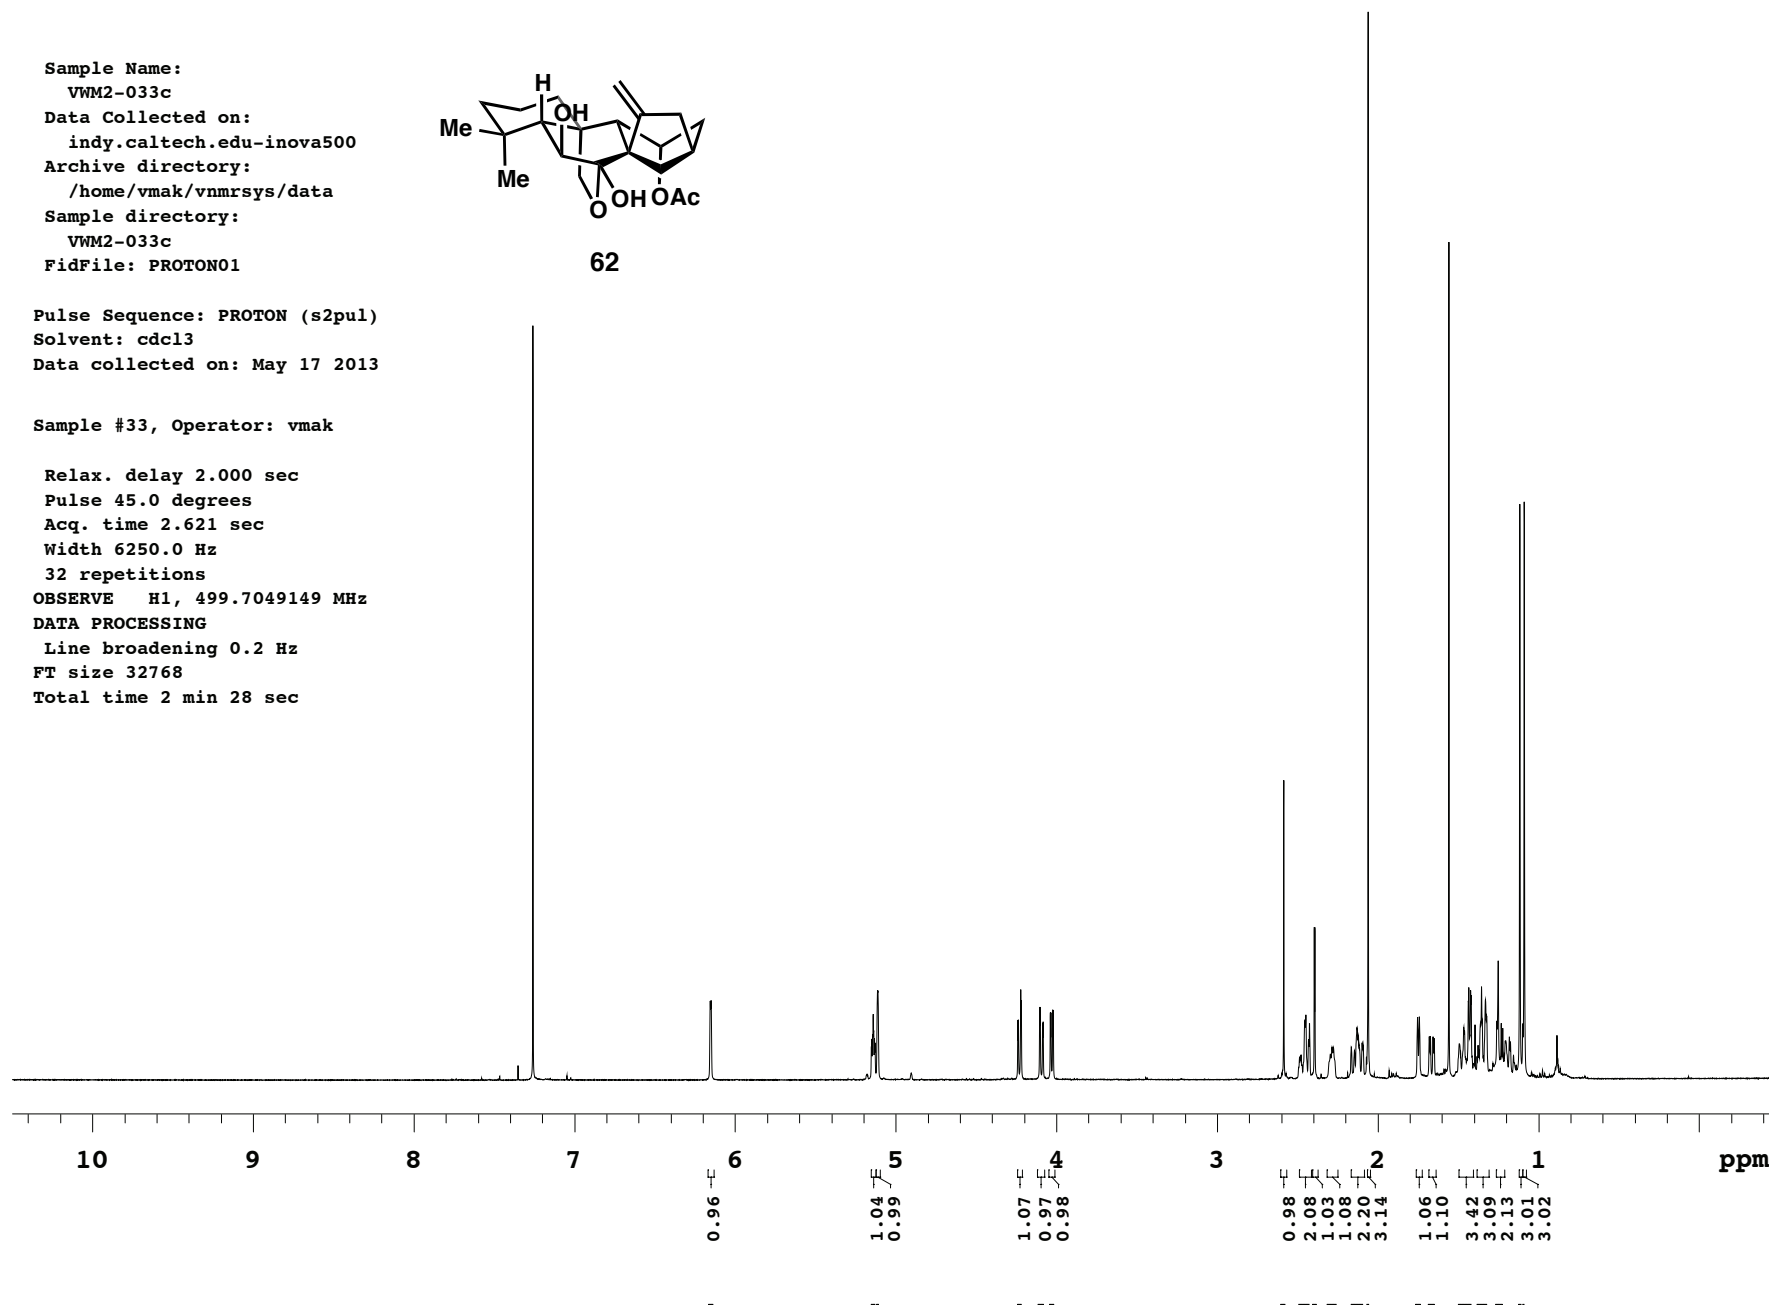



Sample Name:  
VWM2-033c  
Data Collected on:  
indy.caltech.edu-inova500  
Archive directory:  
/home/vmak/vnmrsys/data  
Sample directory:  
VWM2-033c  
FidFile: CARBON01

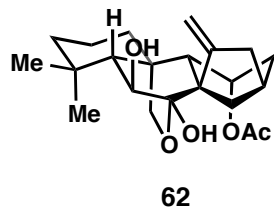

Pulse Sequence: CARBON (s2pul)  
Solvent: cdcl3  
Data collected on: May 17 2013

Sample #33, Operator: vmak

Relax. delay 0.100 sec  
Pulse 45.0 degrees  
Acq. time 1.042 sec  
Width 31446.5 Hz  
3000 repetitions  
OBSERVE C13, 125.6509004 MHz  
DECOUPLE H1, 499.7074131 MHz  
Power 40 dB  
continuously on  
WALTZ-16 modulated  
DATA PROCESSING  
Line broadening 0.5 Hz  
FT size 65536  
Total time 57 min

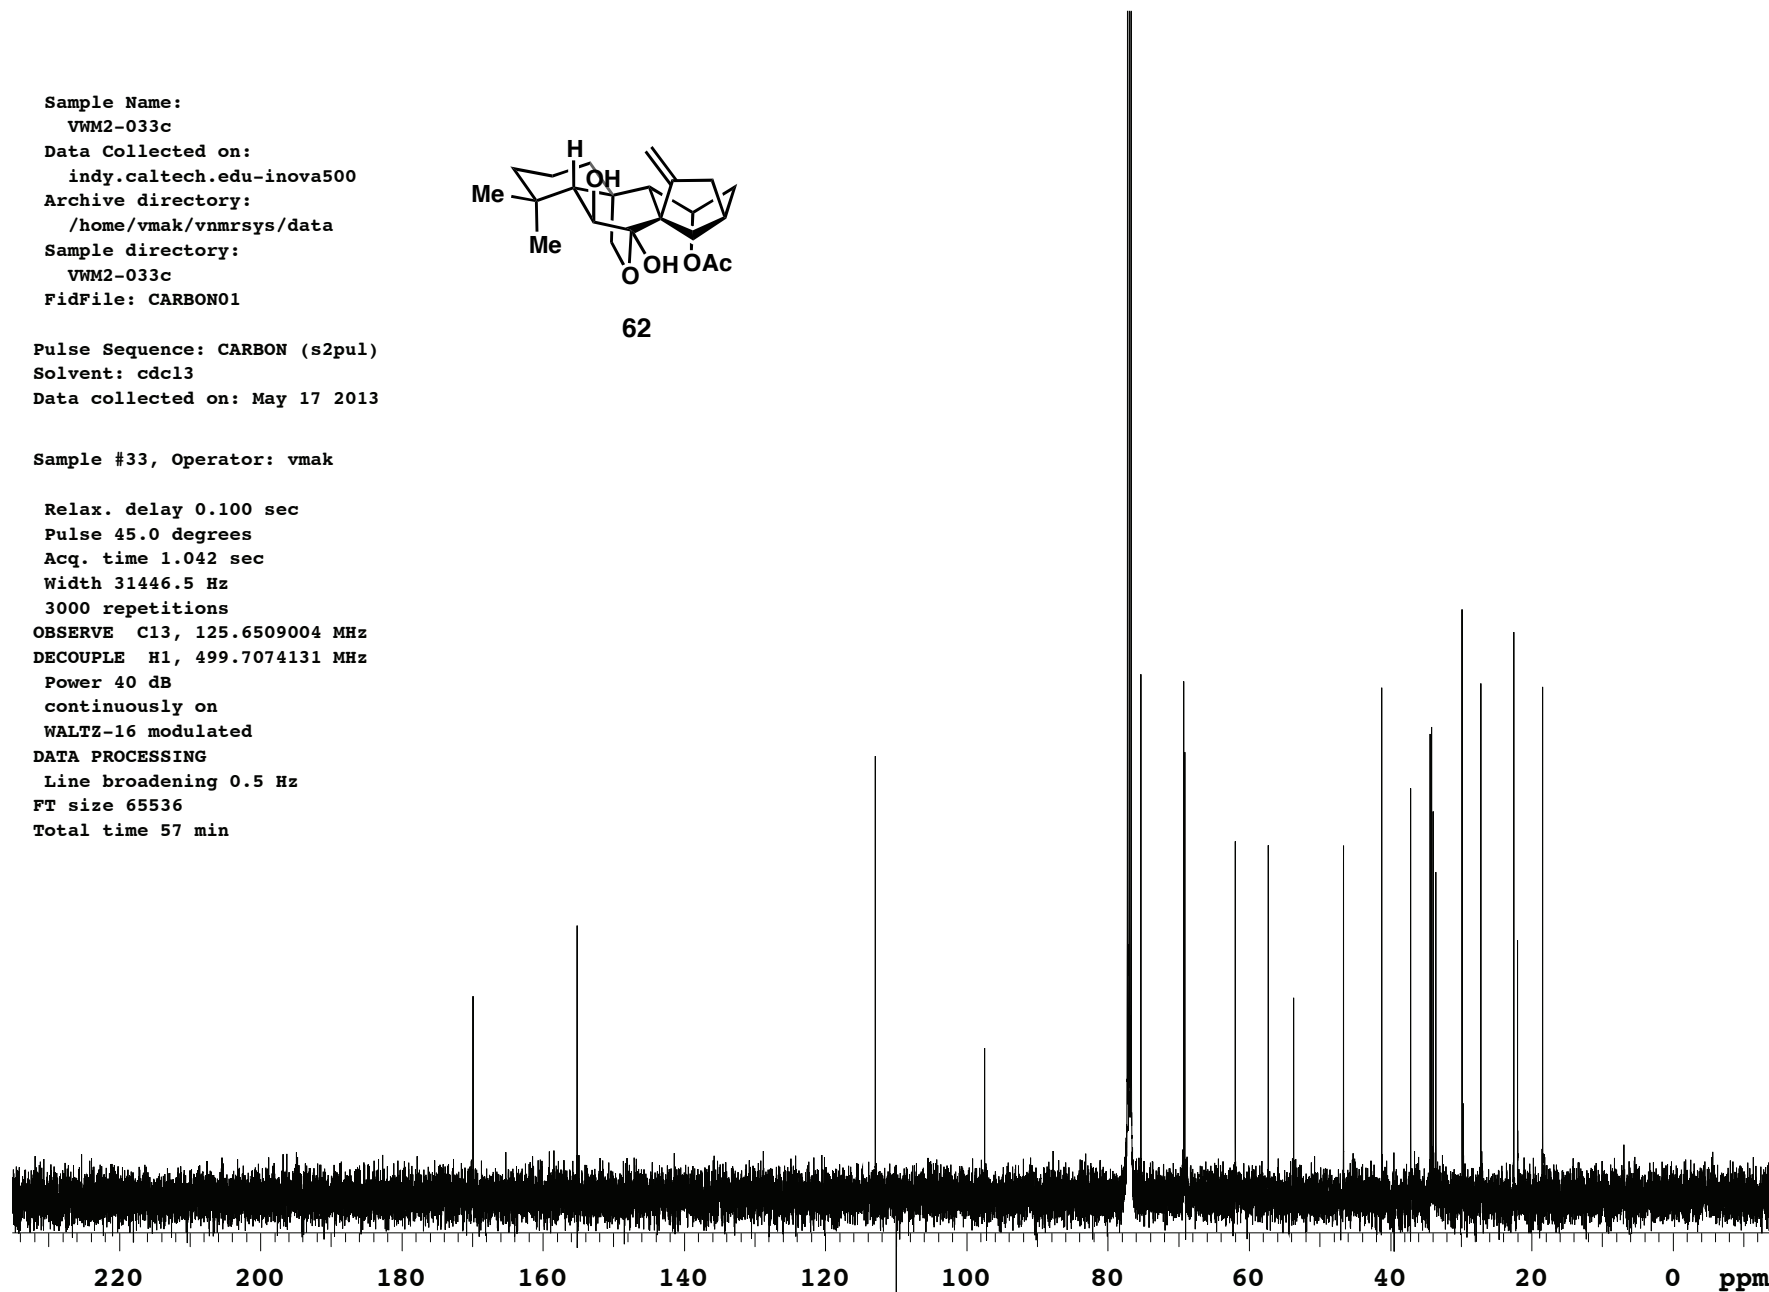

Sample Name:  
VWM2-063-f24-41  
Data Collected on:  
indy.caltech.edu-inova500  
Archive directory:  
/home/vmak/vnmrsys/data  
Sample directory:  
VWM2-063-f24-41  
FidFile: PROTON01

Pulse Sequence: PROTON (s2pul)  
Solvent: cdcl3  
Data collected on: Jun 13 2013

Sample #22, Operator: vmak

Relax. delay 2.000 sec  
Pulse 45.0 degrees  
Acq. time 2.621 sec  
Width 6250.0 Hz  
64 repetitions  
OBSERVE H1, 499.7049153 MHz  
DATA PROCESSING  
Line broadening 0.2 Hz  
FT size 32768  
Total time 4 min 56 sec

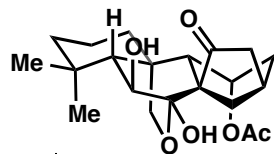

63

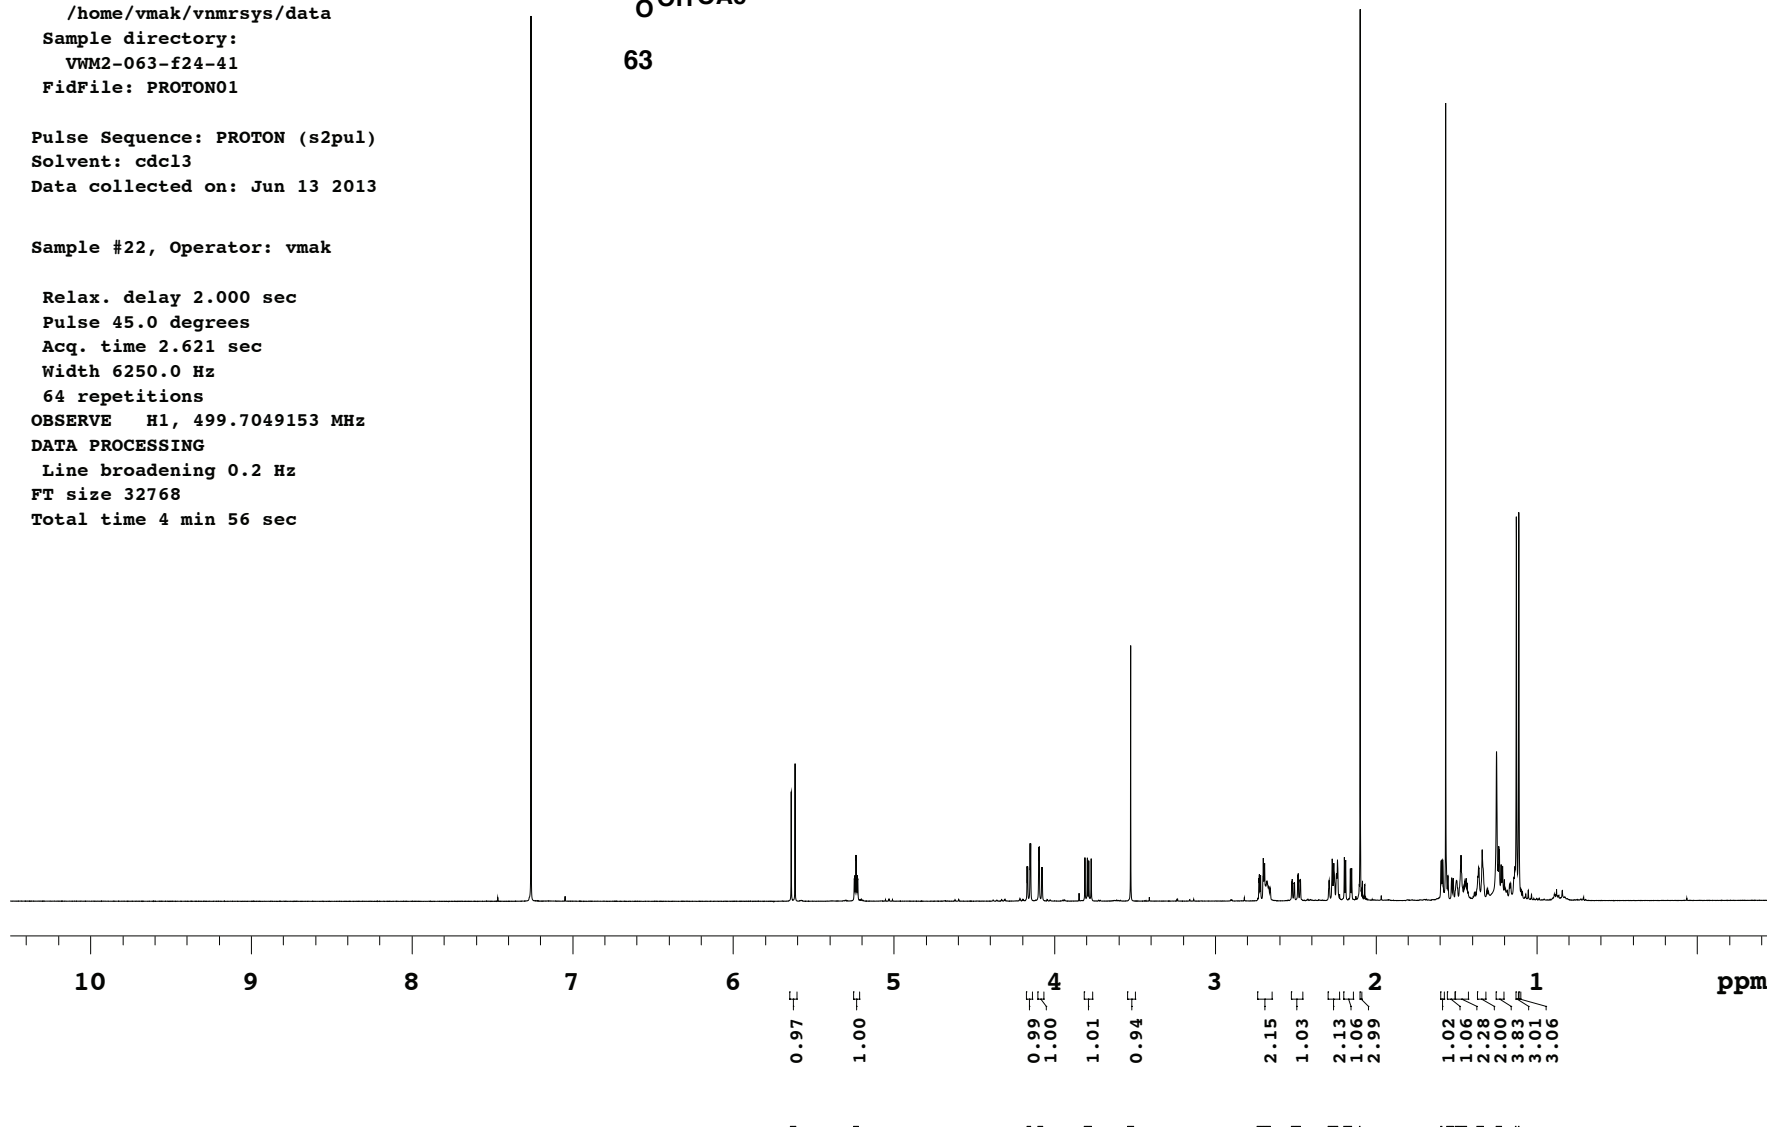

Sample Name:  
VWM2-043-f26-36  
Data Collected on:  
indy.caltech.edu-inova500  
Archive directory:  
/home/vmak/vnmrsys/data  
Sample directory:  
VWM2-043-f26-36  
FidFile: CARBON01

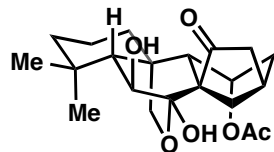

63

Pulse Sequence: CARBON (s2pul)  
Solvent: cdcl3  
Data collected on: May 24 2013

Sample #34, Operator: vmak

Relax. delay 0.100 sec  
Pulse 45.0 degrees  
Acq. time 1.042 sec  
Width 31446.5 Hz  
3100 repetitions  
OBSERVE C13, 125.6509011 MHz  
DECOUPLE H1, 499.7074131 MHz  
Power 40 dB  
continuously on  
WALTZ-16 modulated  
DATA PROCESSING  
Line broadening 1.0 Hz  
FT size 65536  
Total time 59 min

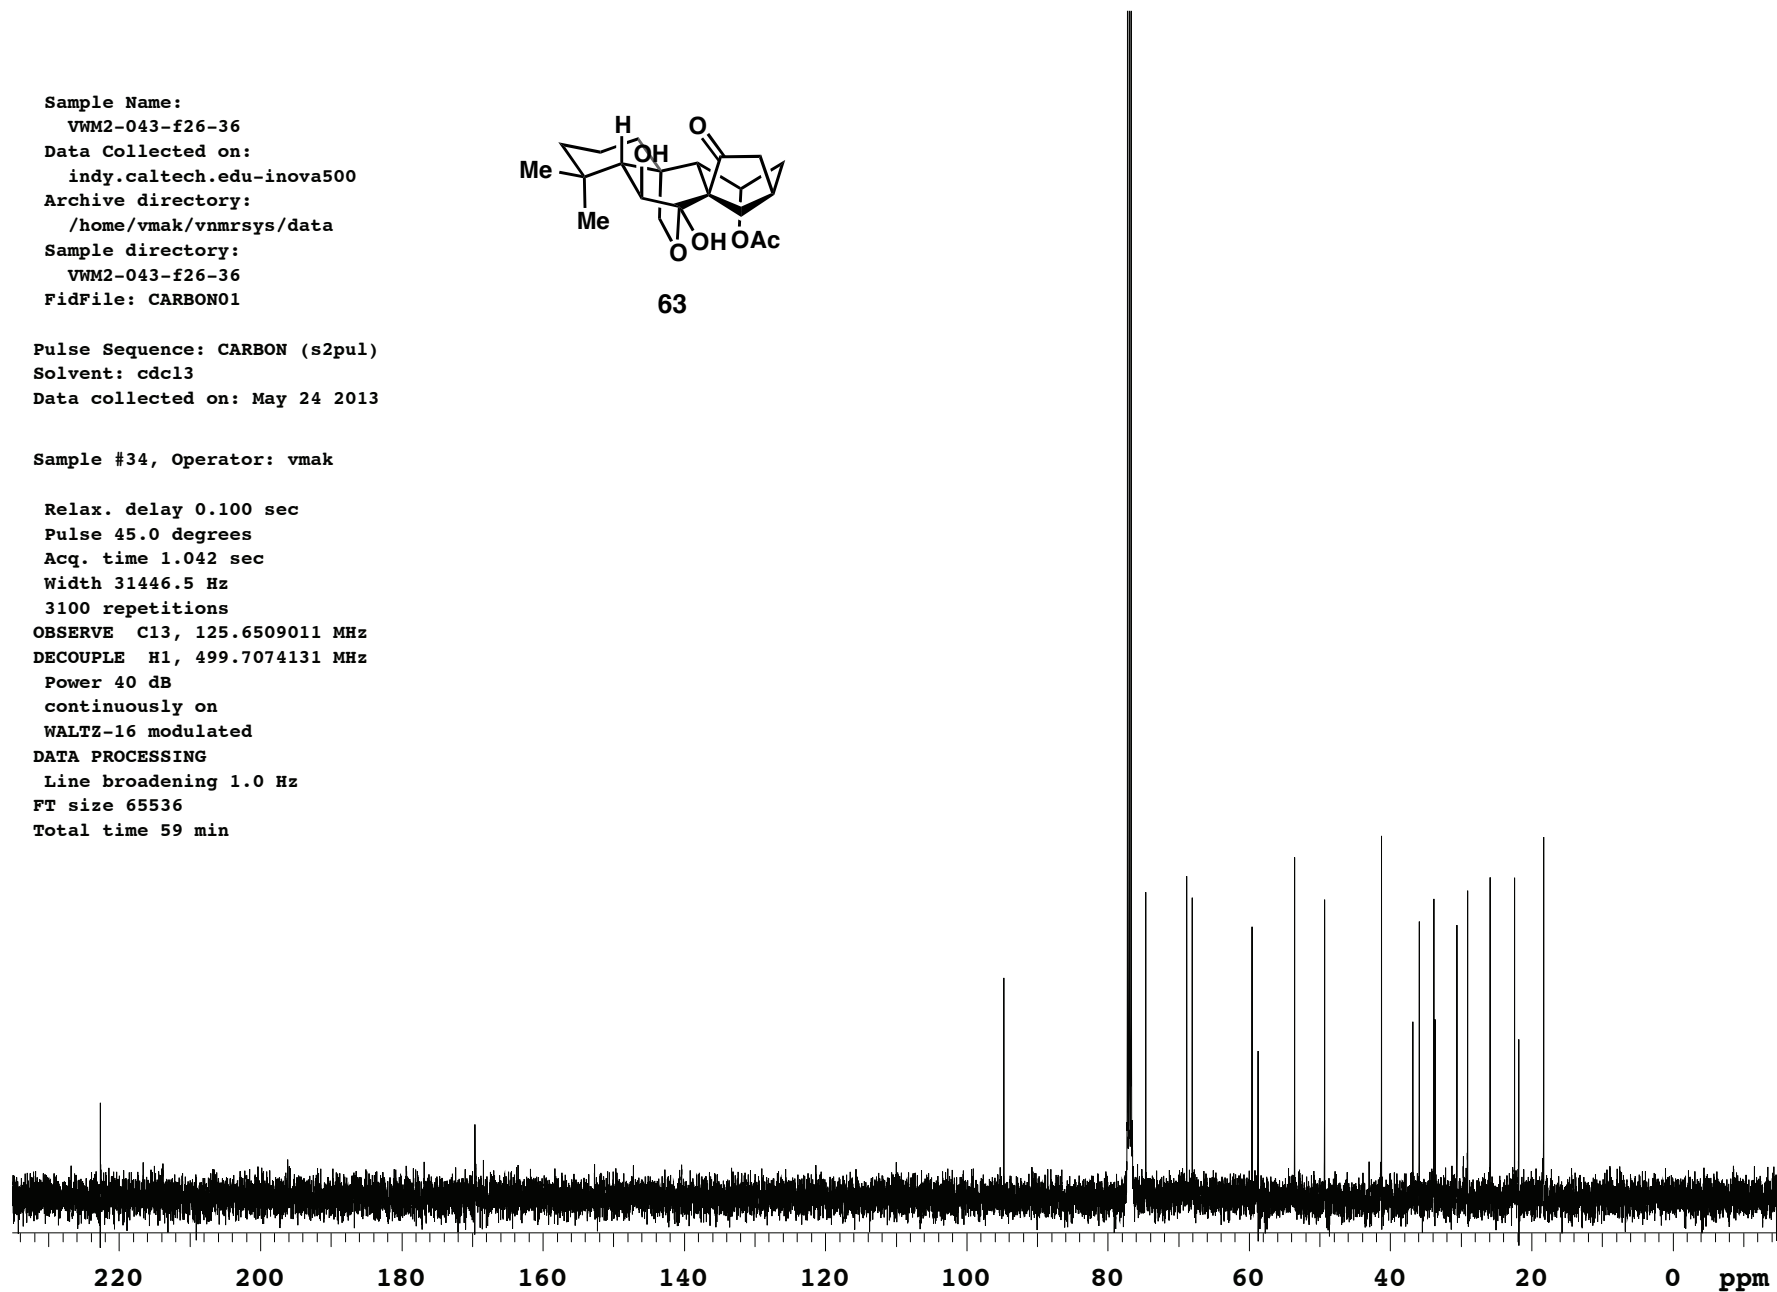

Sample Name:  
VWM2-067-c2  
Data Collected on:  
indy.caltech.edu-inova500  
Archive directory:  
/home/vmak/vnmrsys/data  
Sample directory:  
VWM2-067-c2  
FidFile: PROTON06

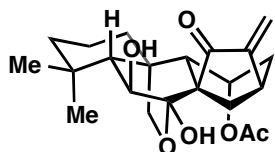

*(-)-longikaurin E (4)*

Pulse Sequence: PROTON (s2pul)  
Solvent: cdcl3  
Data collected on: Jun 23 2013

Sample #35, Operator: vmak

Relax. delay 2.000 sec  
Pulse 45.0 degrees  
Acq. time 2.621 sec  
Width 6250.0 Hz  
128 repetitions  
OBSERVE H1, 499.7049153 MHz  
DATA PROCESSING  
Line broadening 0.2 Hz  
FT size 32768  
Total time 9 min 53 sec

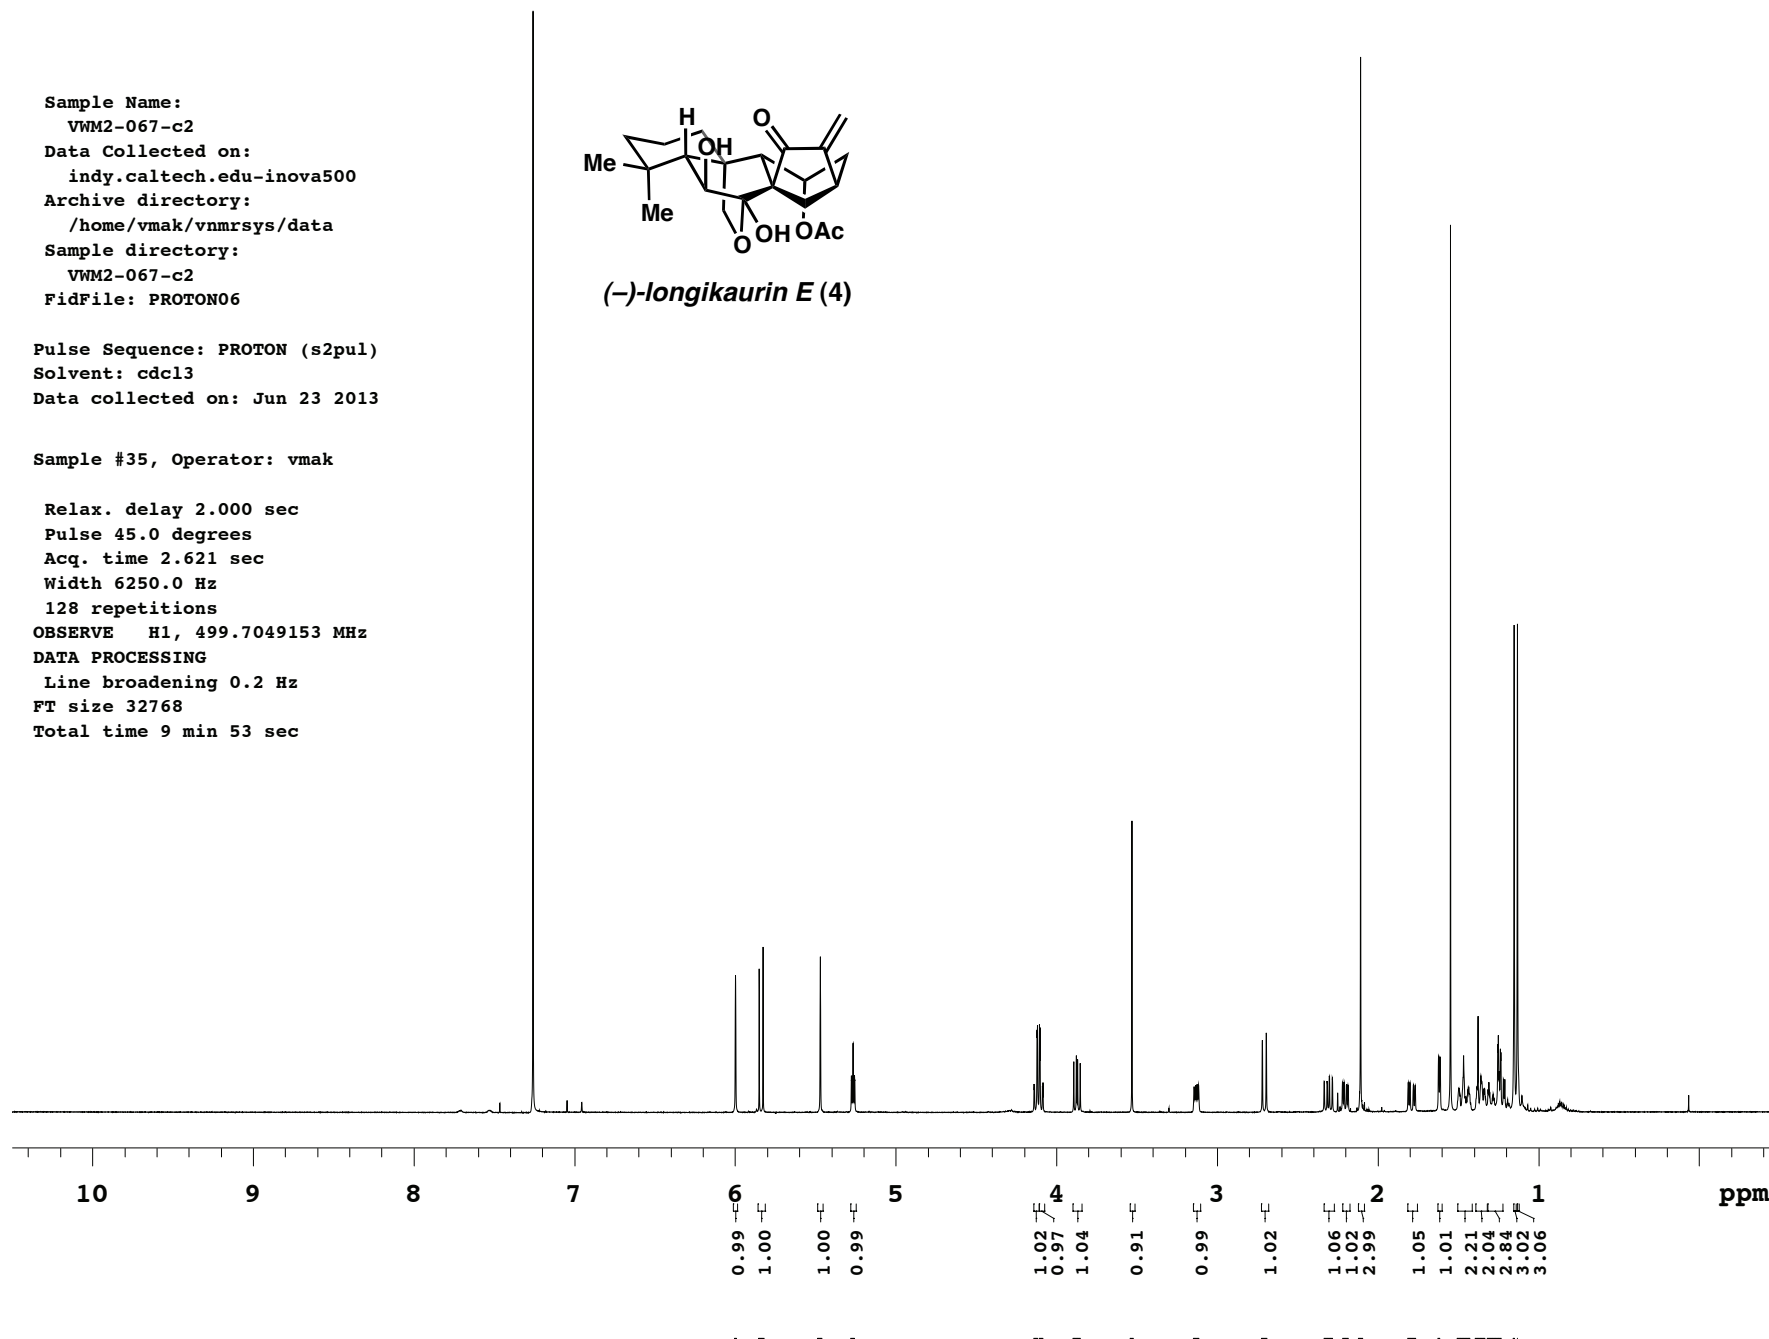

Sample Name:  
VWM2-067-c2  
Data Collected on:  
indy.caltech.edu-inova500  
Archive directory:  
/home/vmak/vnmrsys/data  
Sample directory:  
VWM2-067-c2  
FidFile: CARBON01

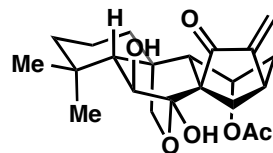

*(-)-longikaurin E (4)*

Pulse Sequence: CARBON (s2pul)  
Solvent: cdcl3  
Data collected on: Jun 22 2013

Sample #20, Operator: vmak

Relax. delay 1.000 sec  
Pulse 45.0 degrees  
Acq. time 1.042 sec  
Width 31446.5 Hz  
12500 repetitions  
OBSERVE C13, 125.6509014 MHz  
DECOUPLE H1, 499.7074131 MHz  
Power 40 dB  
continuously on  
WALTZ-16 modulated  
DATA PROCESSING  
Line broadening 0.5 Hz  
FT size 65536  
Total time 7 hr, 7 min

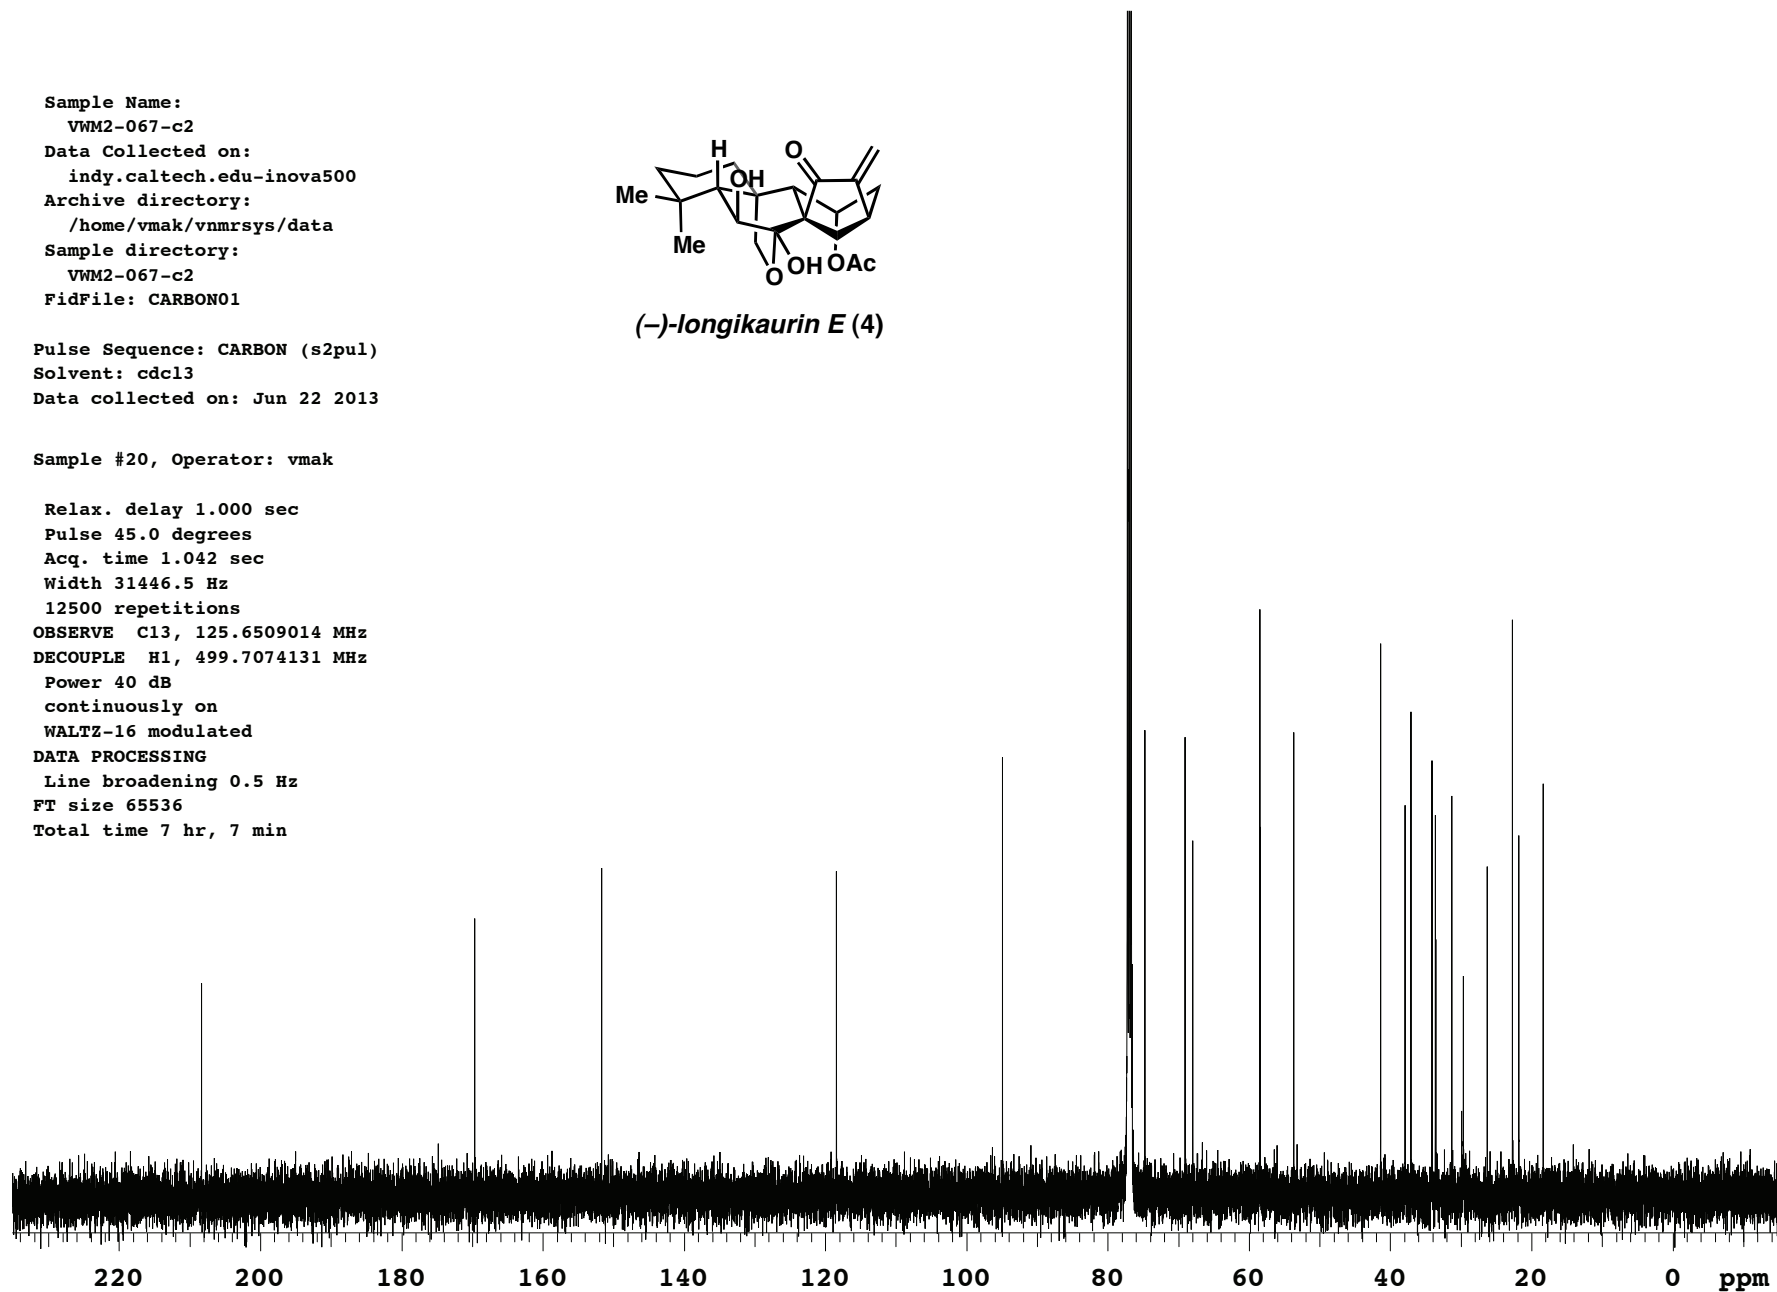

Sample Name:  
VWM2-025-652013  
Data Collected on:  
indy.caltech.edu-inova500  
Archive directory:  
/home/vmak/vnmrsys/data  
Sample directory:  
VWM2-025-652013  
FidFile: PROTON02

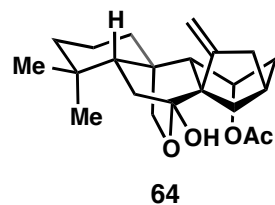

Pulse Sequence: PROTON (s2pul)  
Solvent: cdcl3  
Data collected on: Jun 5 2013

Sample #36, Operator: vmak

Relax. delay 2.000 sec  
Pulse 45.0 degrees  
Acq. time 2.621 sec  
Width 6250.0 Hz  
128 repetitions  
OBSERVE H1, 499.7049153 MHz  
DATA PROCESSING  
Line broadening 0.2 Hz  
FT size 32768  
Total time 9 min 53 sec

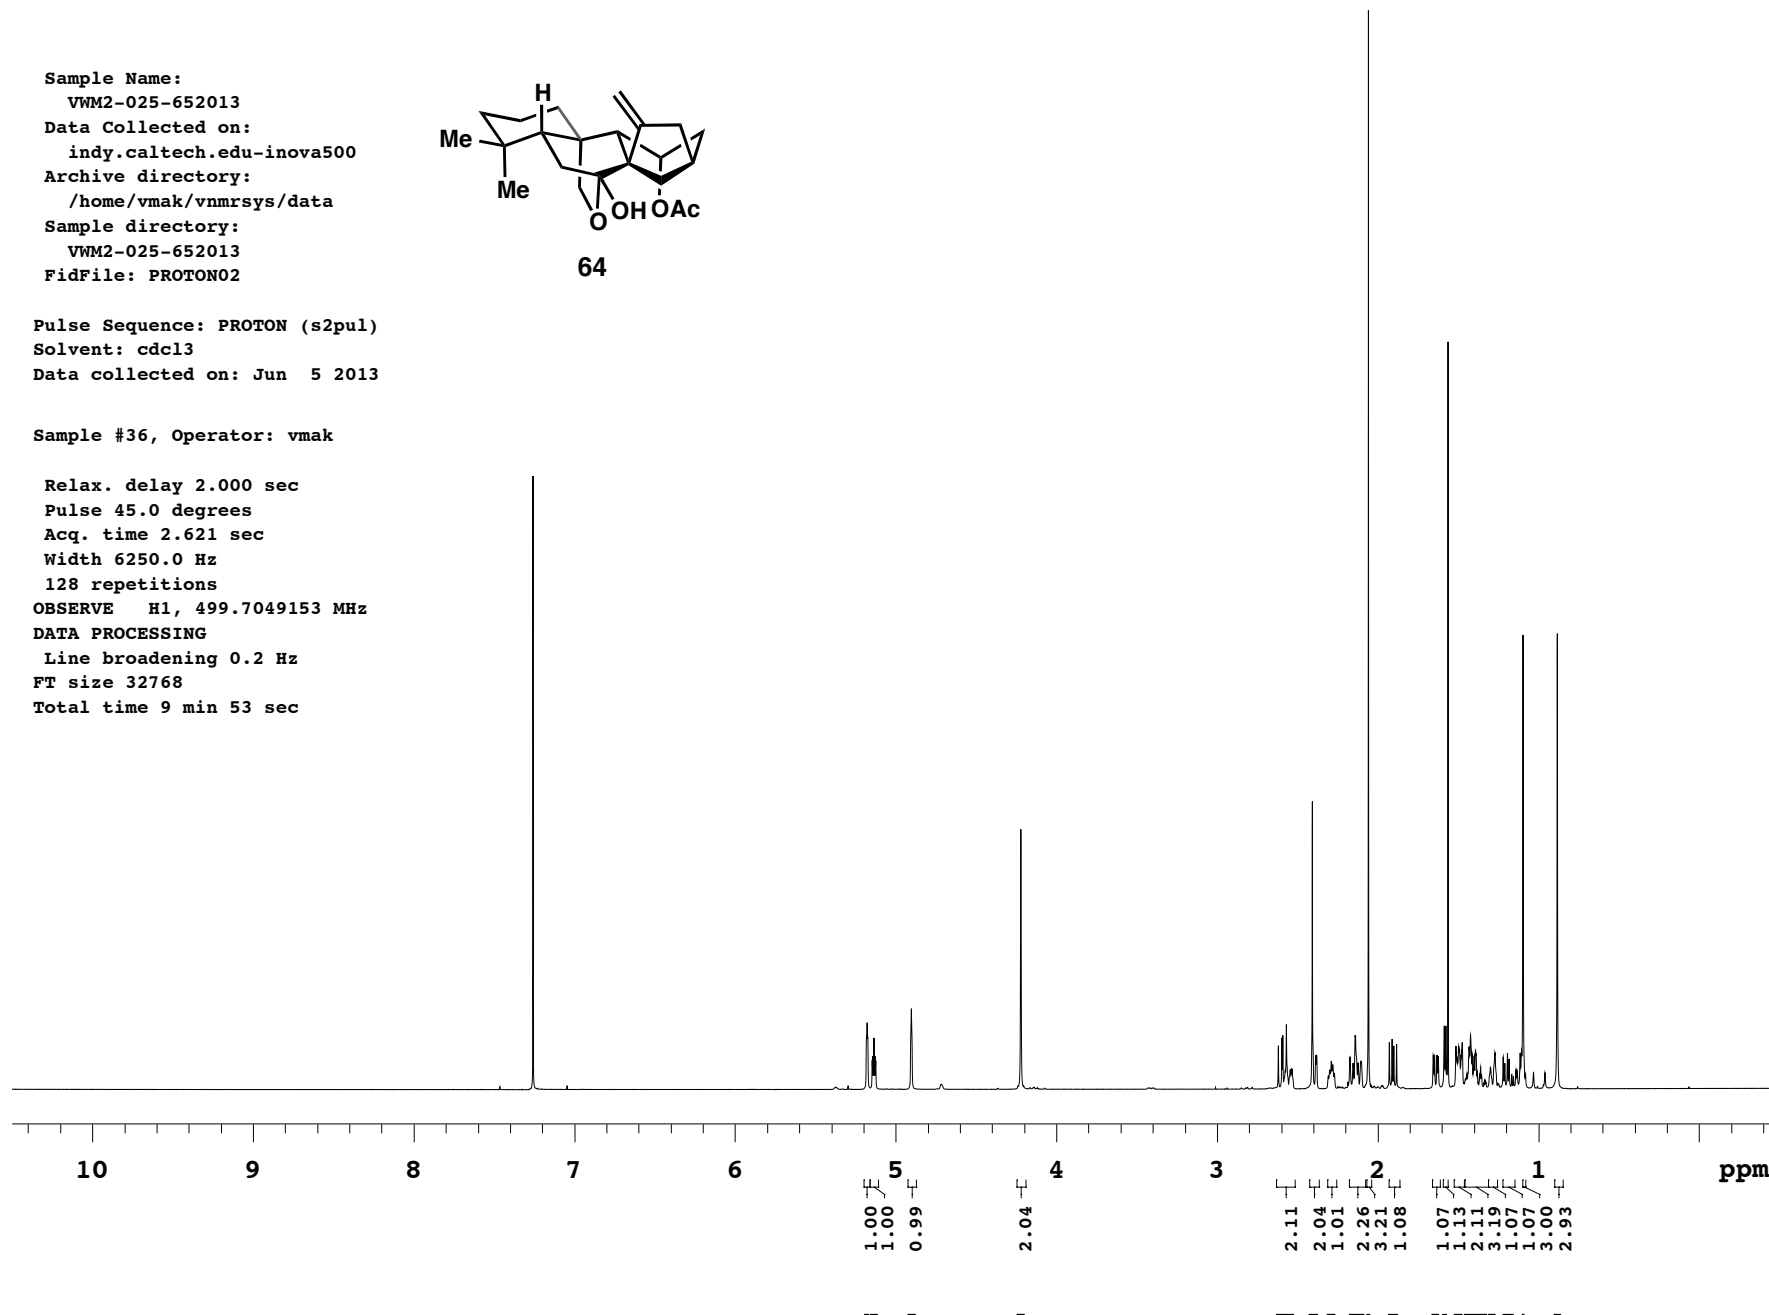

Sample Name:  
VWM2-025-652013  
Data Collected on:  
indy.caltech.edu-inova500  
Archive directory:  
/home/vmak/vnmrsys/data  
Sample directory:  
VWM2-025-652013  
FidFile: CARBON01

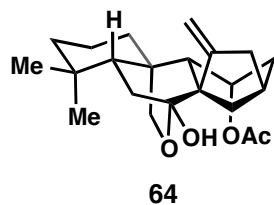

Pulse Sequence: CARBON (s2pul)  
Solvent: cdcl3  
Data collected on: Jun 5 2013

Sample #36, Operator: vmak

Relax. delay 1.000 sec  
Pulse 45.0 degrees  
Acq. time 1.042 sec  
Width 31446.5 Hz  
8000 repetitions  
OBSERVE C13, 125.6509021 MHz  
DECOUPLE H1, 499.7074131 MHz  
Power 40 dB  
continuously on  
WALTZ-16 modulated  
DATA PROCESSING  
Line broadening 0.5 Hz  
FT size 65536  
Total time 4 hr, 33 min

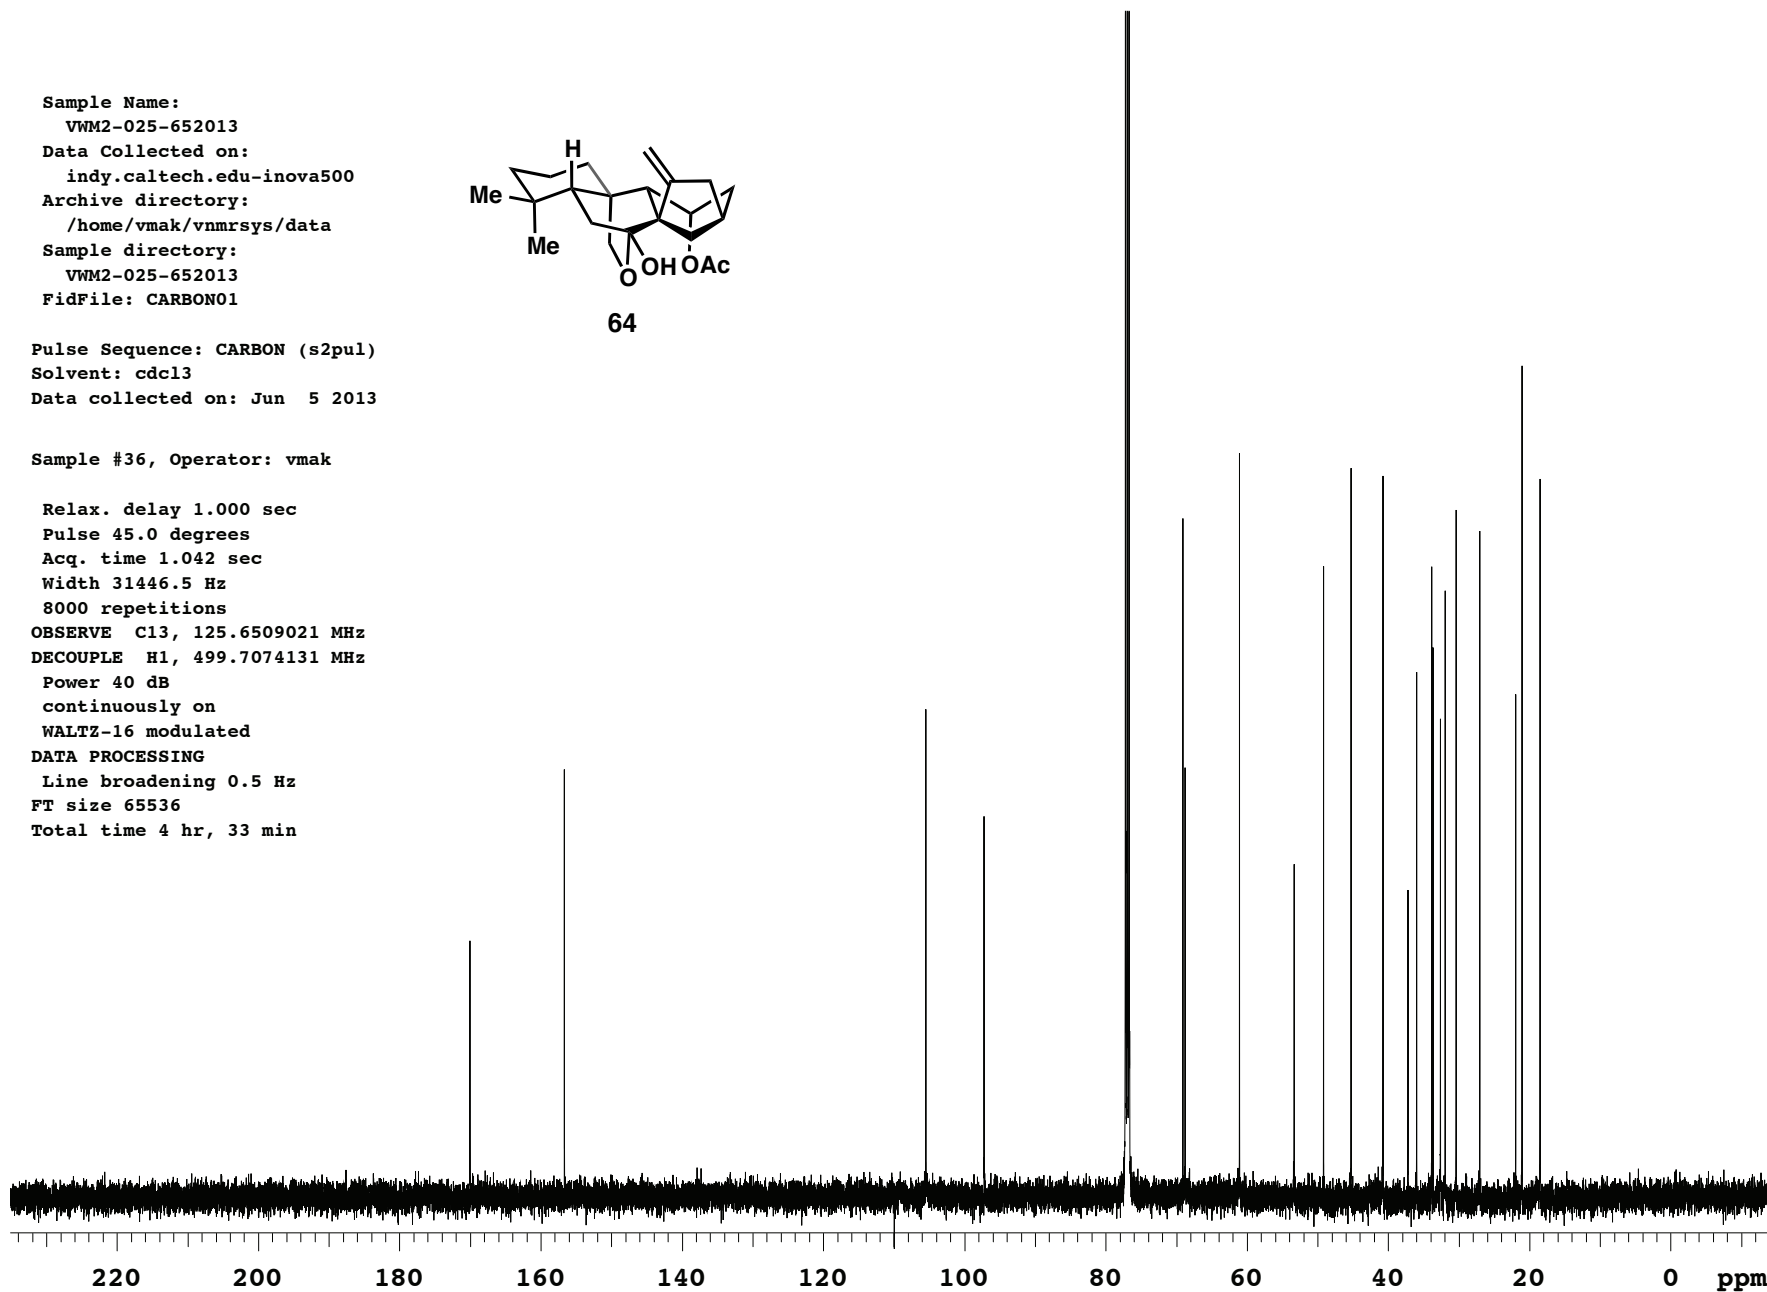

VWM3-063

Sample Name:  
VWM3-063  
Data Collected on:  
indy.caltech.edu-inova500  
Archive directory:  
/home/vmak/vnmrsys/data  
Sample directory:  
VWM3-063  
FidFile: PROTON05

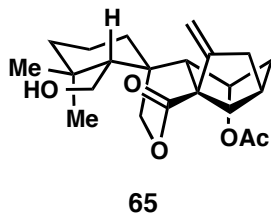

Pulse Sequence: PROTON (s2pul)  
Solvent: cdcl3  
Data collected on: Jan 21 2014

Sample #18, Operator: vmak

Relax. delay 1.000 sec  
Pulse 45.0 degrees  
Acq. time 3.000 sec  
Width 8000.0 Hz  
32 repetitions  
OBSERVE H1, 499.6951455 MHz  
DATA PROCESSING  
Line broadening 0.5 Hz  
FT size 65536  
Total time 2 min 8 sec

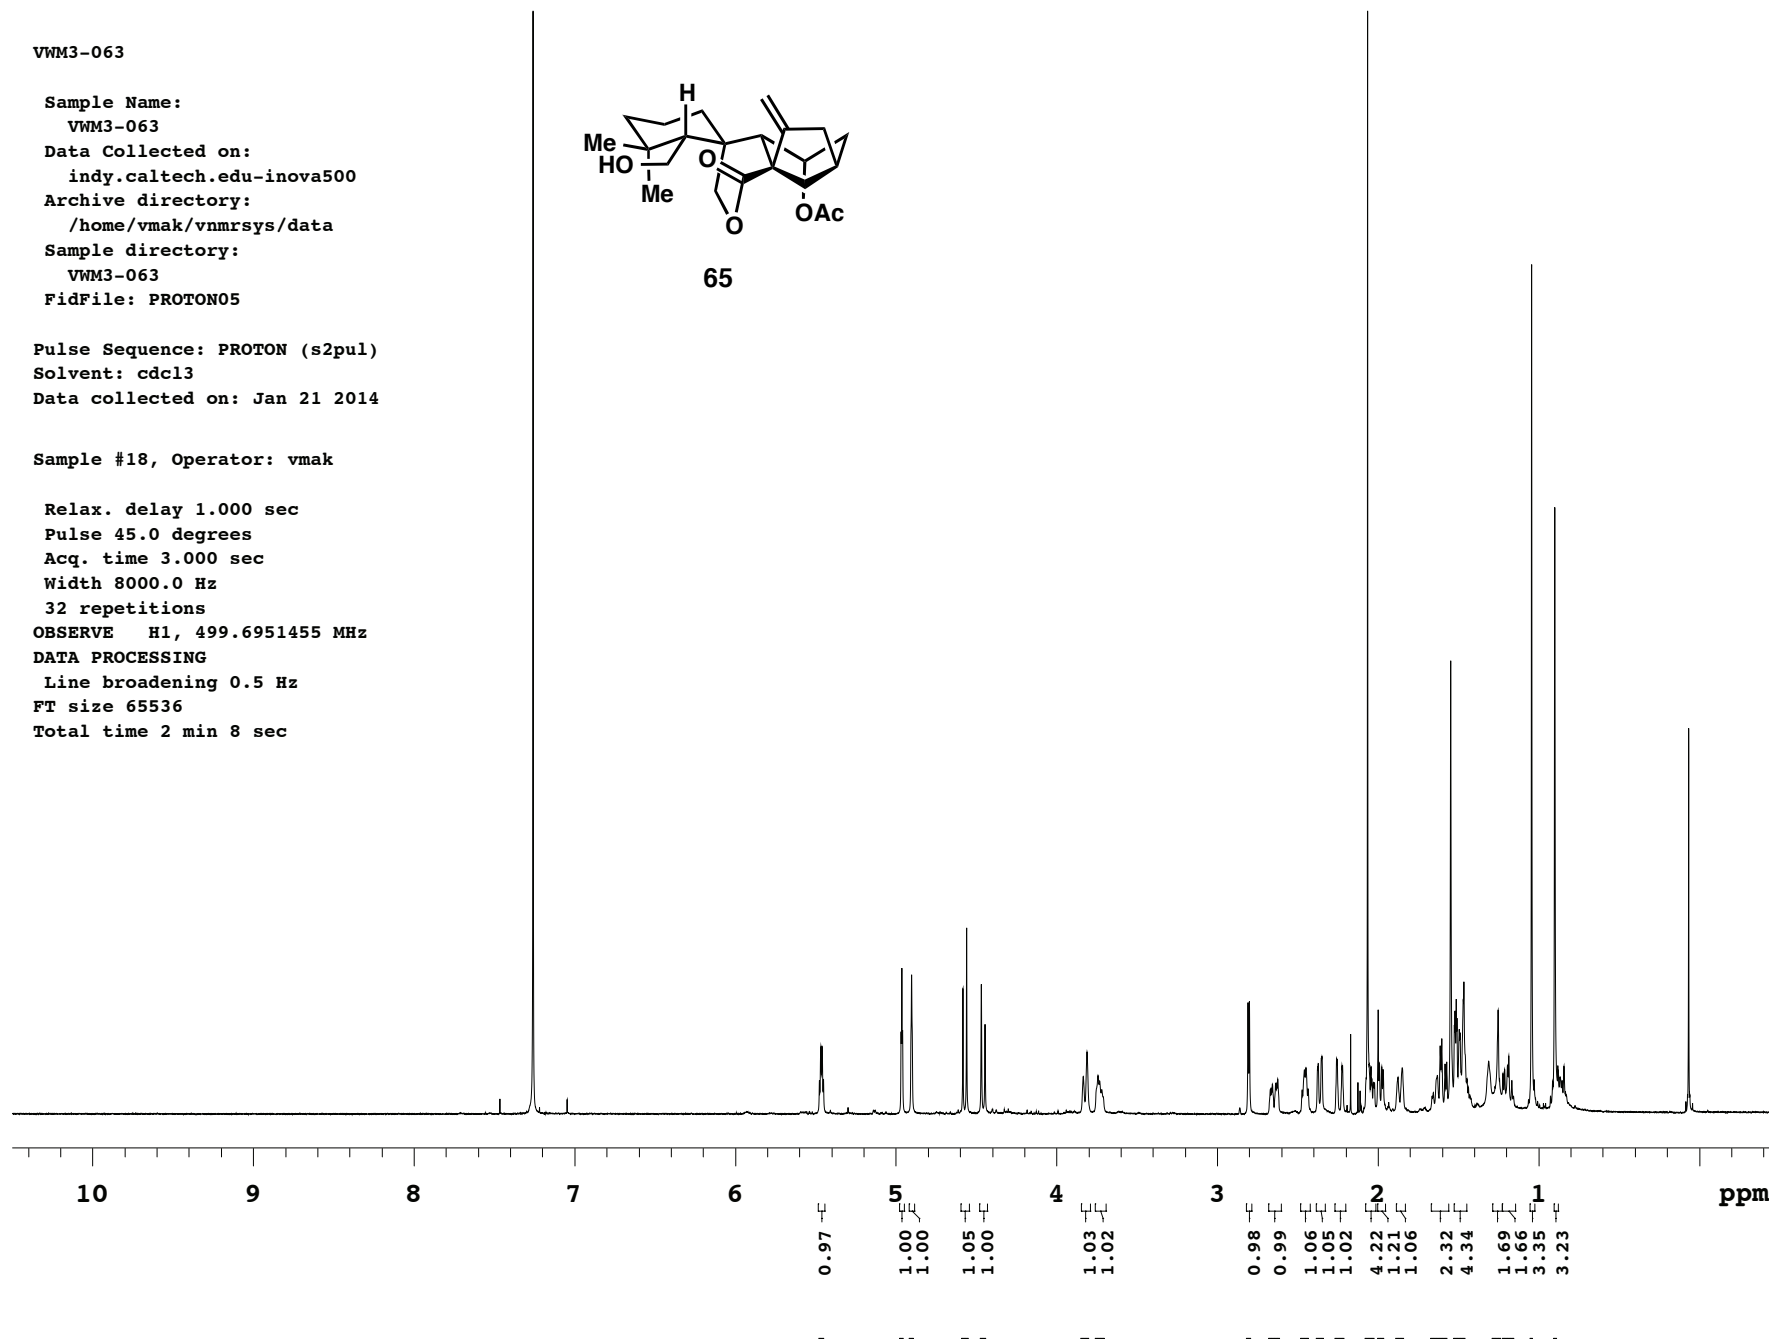



VWM3-063

Sample Name:  
VWM3-063  
Data Collected on:  
indy.caltech.edu-inova500  
Archive directory:  
/home/vmak/vnmrsys/data  
Sample directory:  
VWM3-063  
FidFile: CARBON01

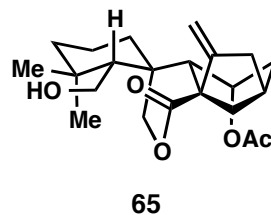

Pulse Sequence: CARBON (s2pul)  
Solvent: cdcl3  
Data collected on: Jan 21 2014

Sample #18, Operator: vmak

Relax. delay 1.000 sec  
Pulse 45.0 degrees  
Acq. time 1.042 sec  
Width 31446.5 Hz  
5000 repetitions  
OBSERVE C13, 125.6484443 MHz  
DECOUPLE H1, 499.6976415 MHz  
Power 40 dB  
continuously on  
WALTZ-16 modulated  
DATA PROCESSING  
Line broadening 2.0 Hz  
FT size 65536  
Total time 2 hr, 50 min

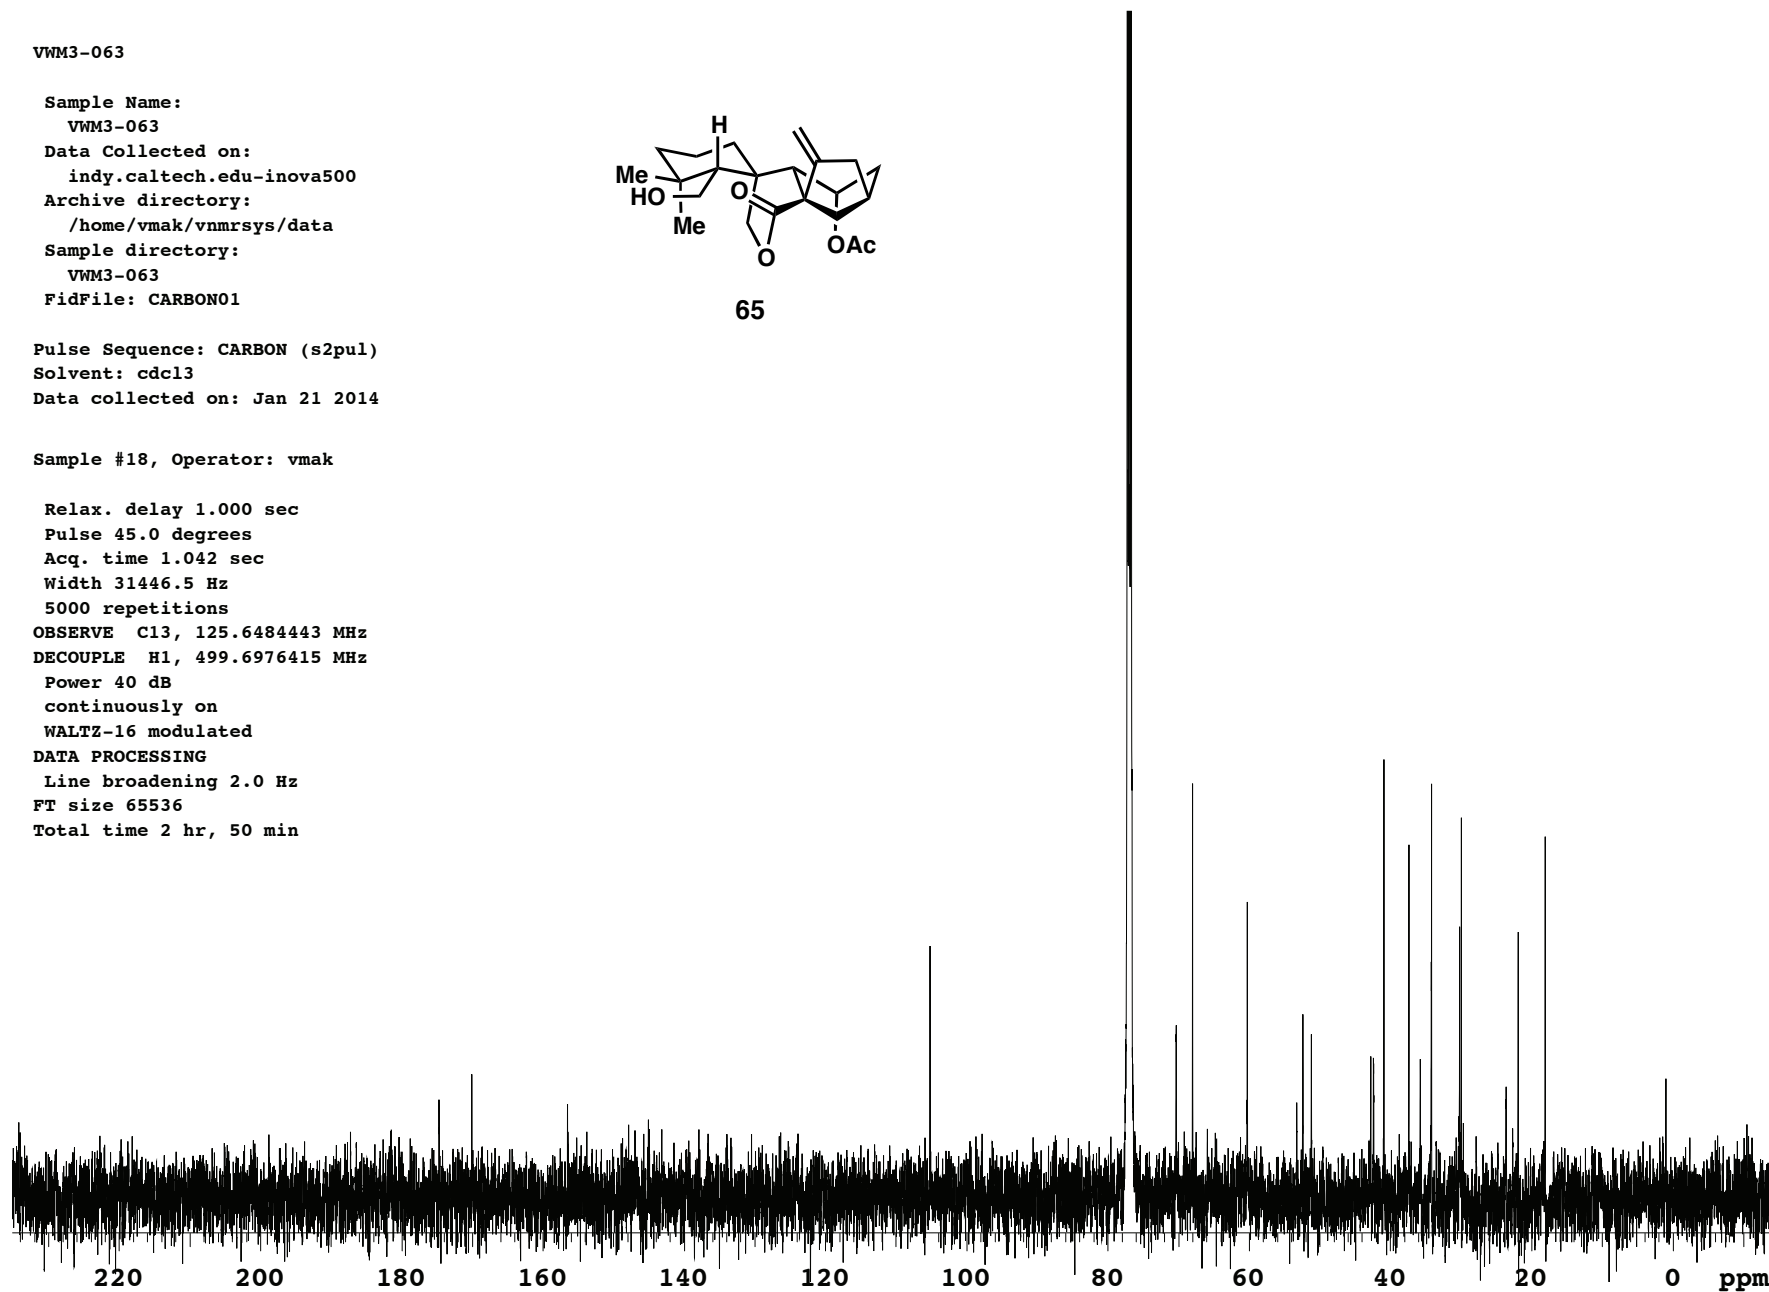

Supplement: mmc1 [file mmc1.pdf]
